# Supplementary material for: Genomics Reveal Staphylococcus aureus Persists during Long-term Urinary Catheterization Despite Antimicrobial Therapy and Catheter Exchanges
Source: Research Square preprint supplement (doi:10.21203/rs.3.rs-6702271/v1), 2025-05-29
Supplement: Supplementary file 1 [file 9d644b4d2bc1d98ec3592d7f.docx]

**Supplemental Figures**

**
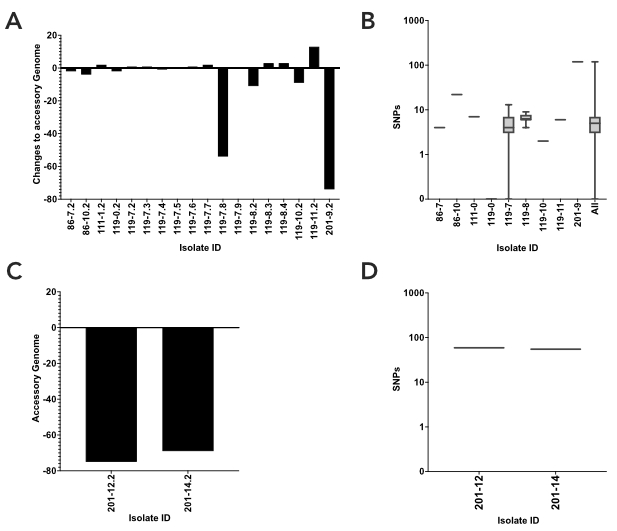
**

**Figure S1**. Analyses of accessory genomes and single nucleotide polymorphisms (SNPs) from co-isolated strains. **A)** Analysis of the changes in the accessory genome of isolates from within a participant collected at the same time point – termed co-isolates. Changes in the accessory genomes are shown as changes from the reference isolates: a positive number indicates a gain of genes, a negative number denotes a loss of genes, and a value of 0 represents no change. Co-isolate accessory genome changes compared to the isolate selected for future analysis include: 86-7 (n=2, 1 comparison), 86-10 (n=2, 1 comparison), 111-0 (n=2, 1 comparison), 119-0 (n=2, 1 comparison), 119-7 (n=9, 8 comparisons), 119-8 (n=4, 3 comparisons), 119-10 (n=2, 1 comparison), 119-11 (n=2, 1 comparison), and 201-9 (n=2, 1 comparison). **B)** SNP analyses of co-isolates from **(A)** including: 86-7 (n=2, 1 comparison), 86-10 (n=2, 1 comparison), 111-0 (n=2, 1 comparison), 119-0 (n=2, 1 comparison), 119-7 (n=9, 71 comparisons), 119-8 (n=4, 12 comparisons), 119-10 (n=2, 1 comparison), 119-11 (n=2, 1 comparison), and 201-9 (n=2, 1 comparison). **C)** Analysis of the changes in the accessory genome of the methicillin susceptible *S. aureus* (MSSA) co-isolates from NHR 201 – 201-12.2 (n=2, 1 comparison) and 201-14.2 (n=2, 1 comparison) – using the methicillin resistant *S. aureus* (MRSA) isolate as the reference. **D)** SNP analyses of MRSA and MSSA co-isolates from NHR 201 collected at the same collection time point from C. Box and whisker plots display the median as a solid bar within the interquartile range (IQR) box, with the whiskers representing the range.


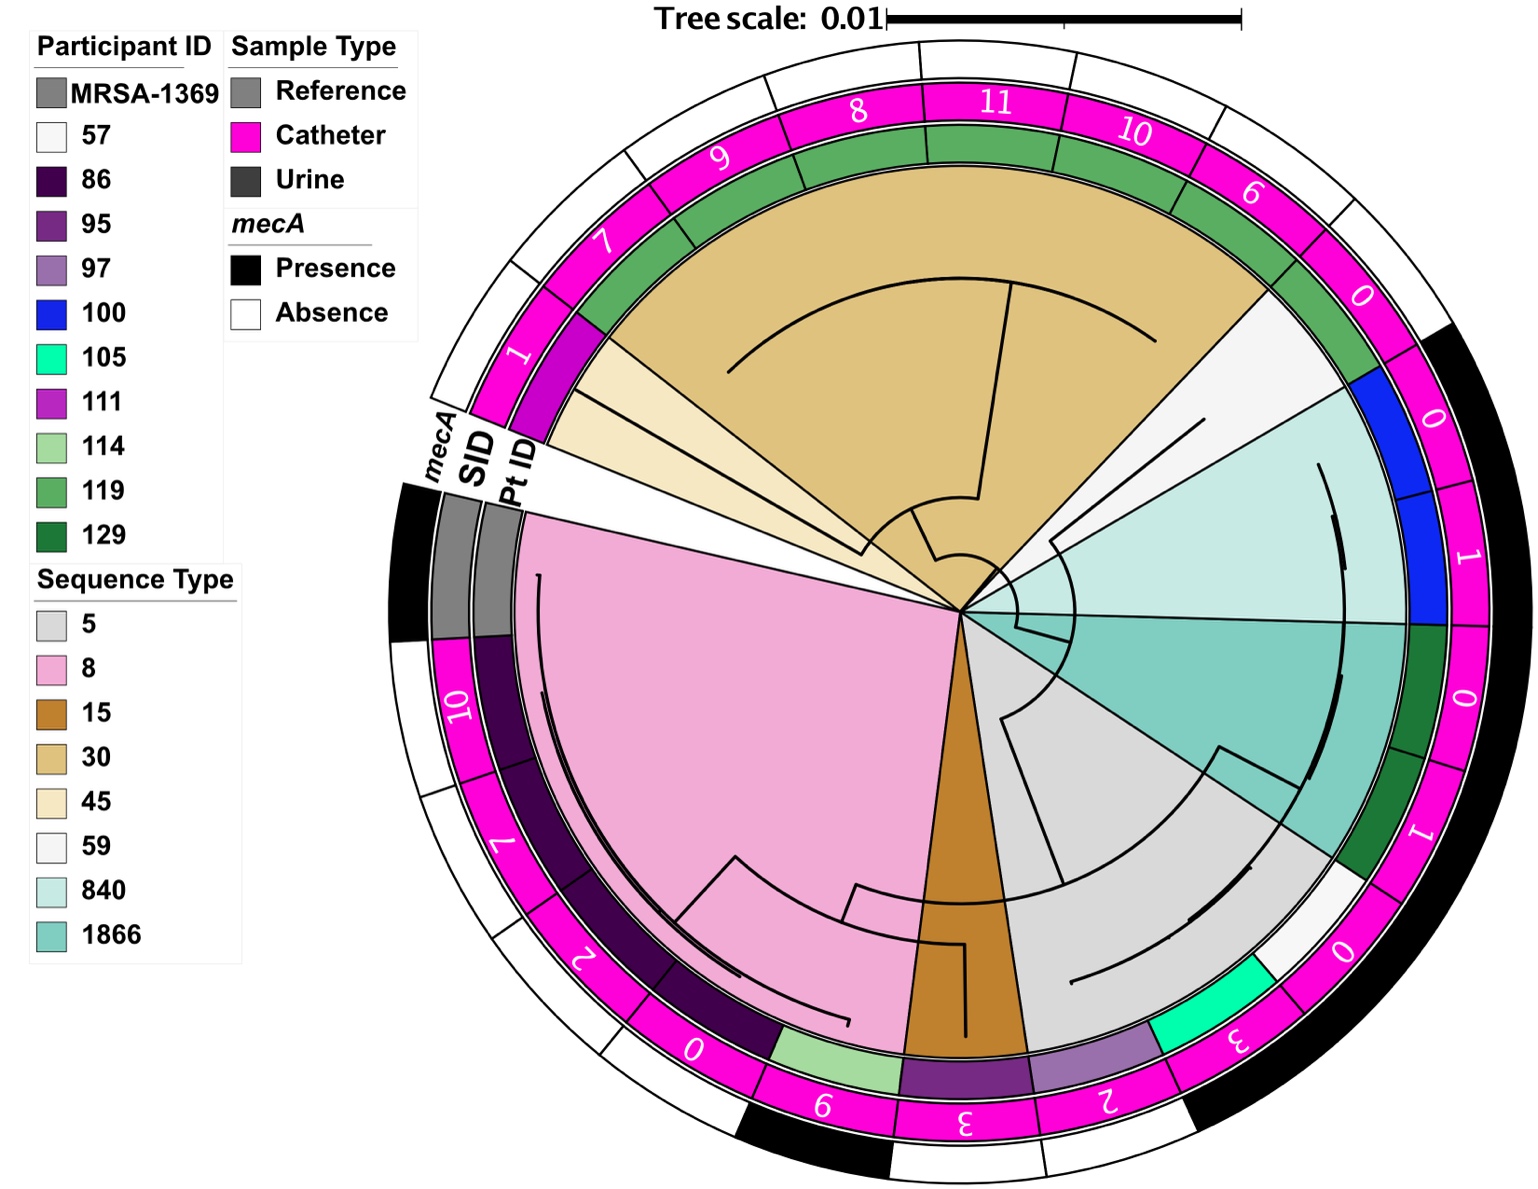


**Figure S2.** Phylogenetic tree of urology outpatient (UP) isolates with the well characterized MRSA-1369 used to root the tree. The participant ID (PT ID), sample type and collection time point (SID), and the presence or absence of *mecA* (*mecA*) are denoted starting from the inner and moving to the outer rings. The multi-locus sequence type (ST) is denoted in the within the branches of the tree.


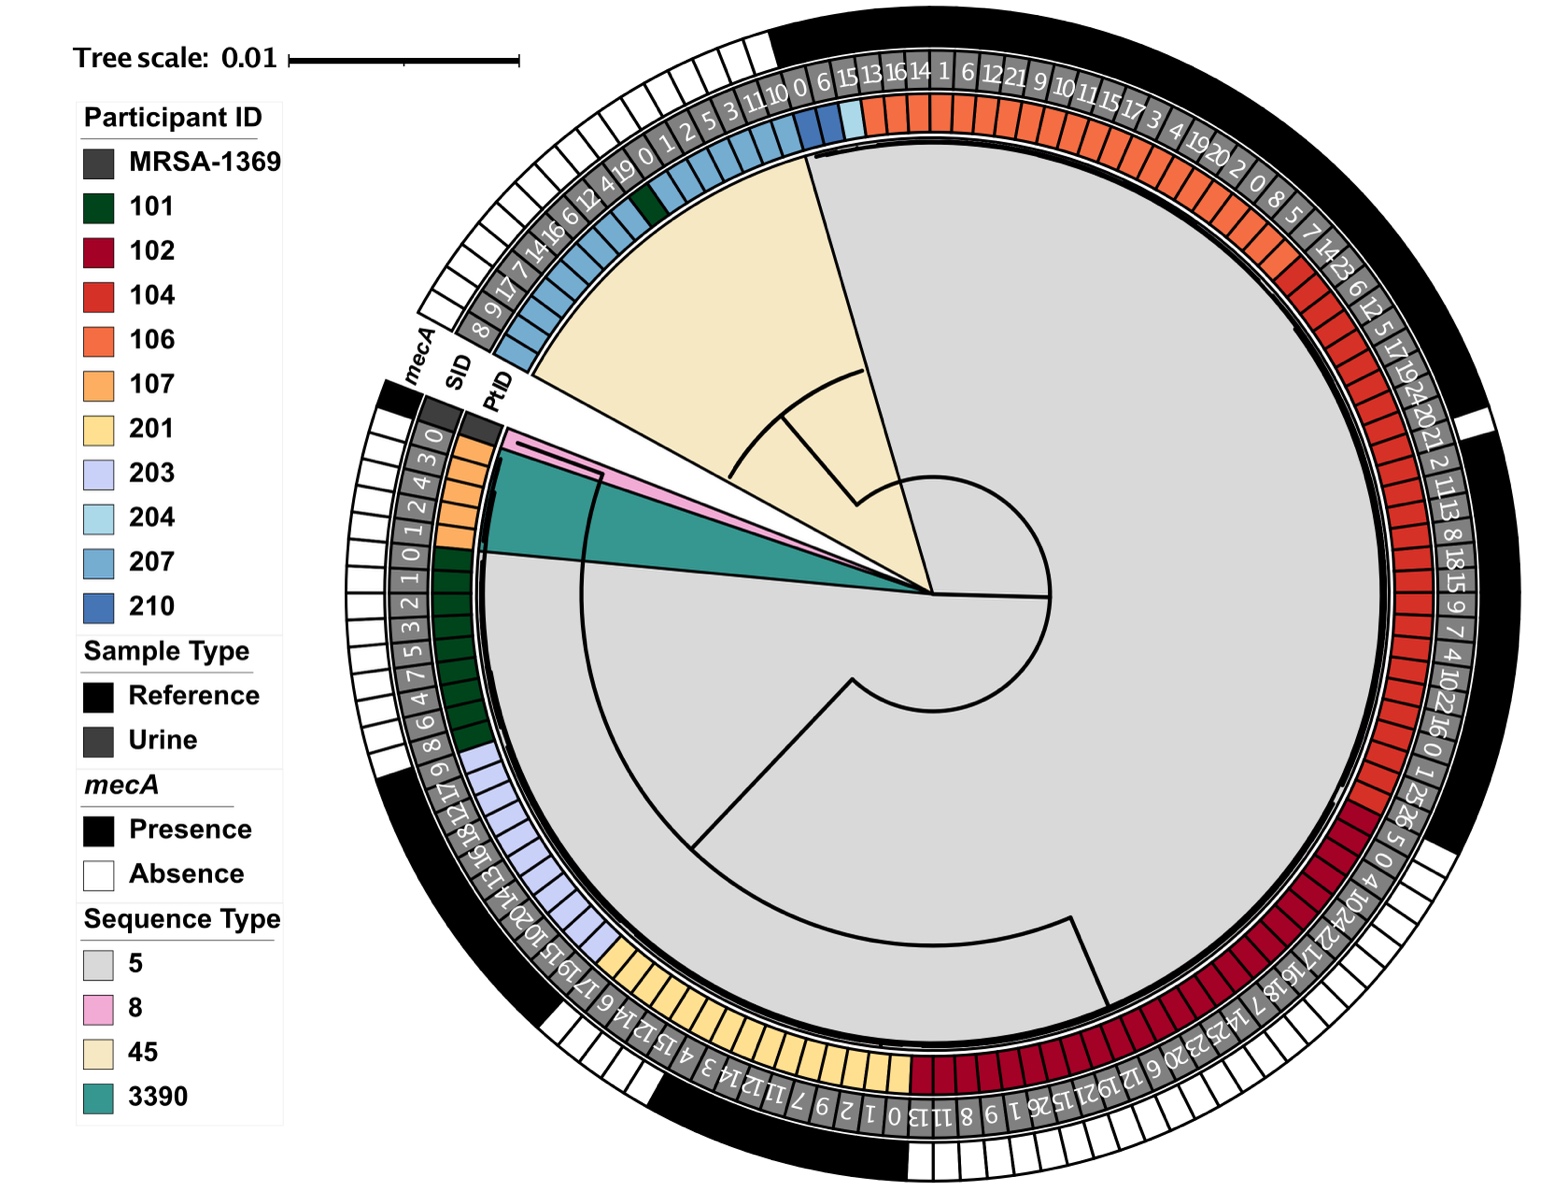


**Figure S3.** Phylogenetic tree of nursing home resident (NHR) isolates with the well characterized MRSA-1369 used to root the tree. The participant ID (PT ID), sample type and collection time point (SID), and the presence or absence of *mecA* (*mecA*) are denoted starting from the inner and moving to the outer rings. The multi-locus sequence type (ST) is denoted in the within the branches of the tree.


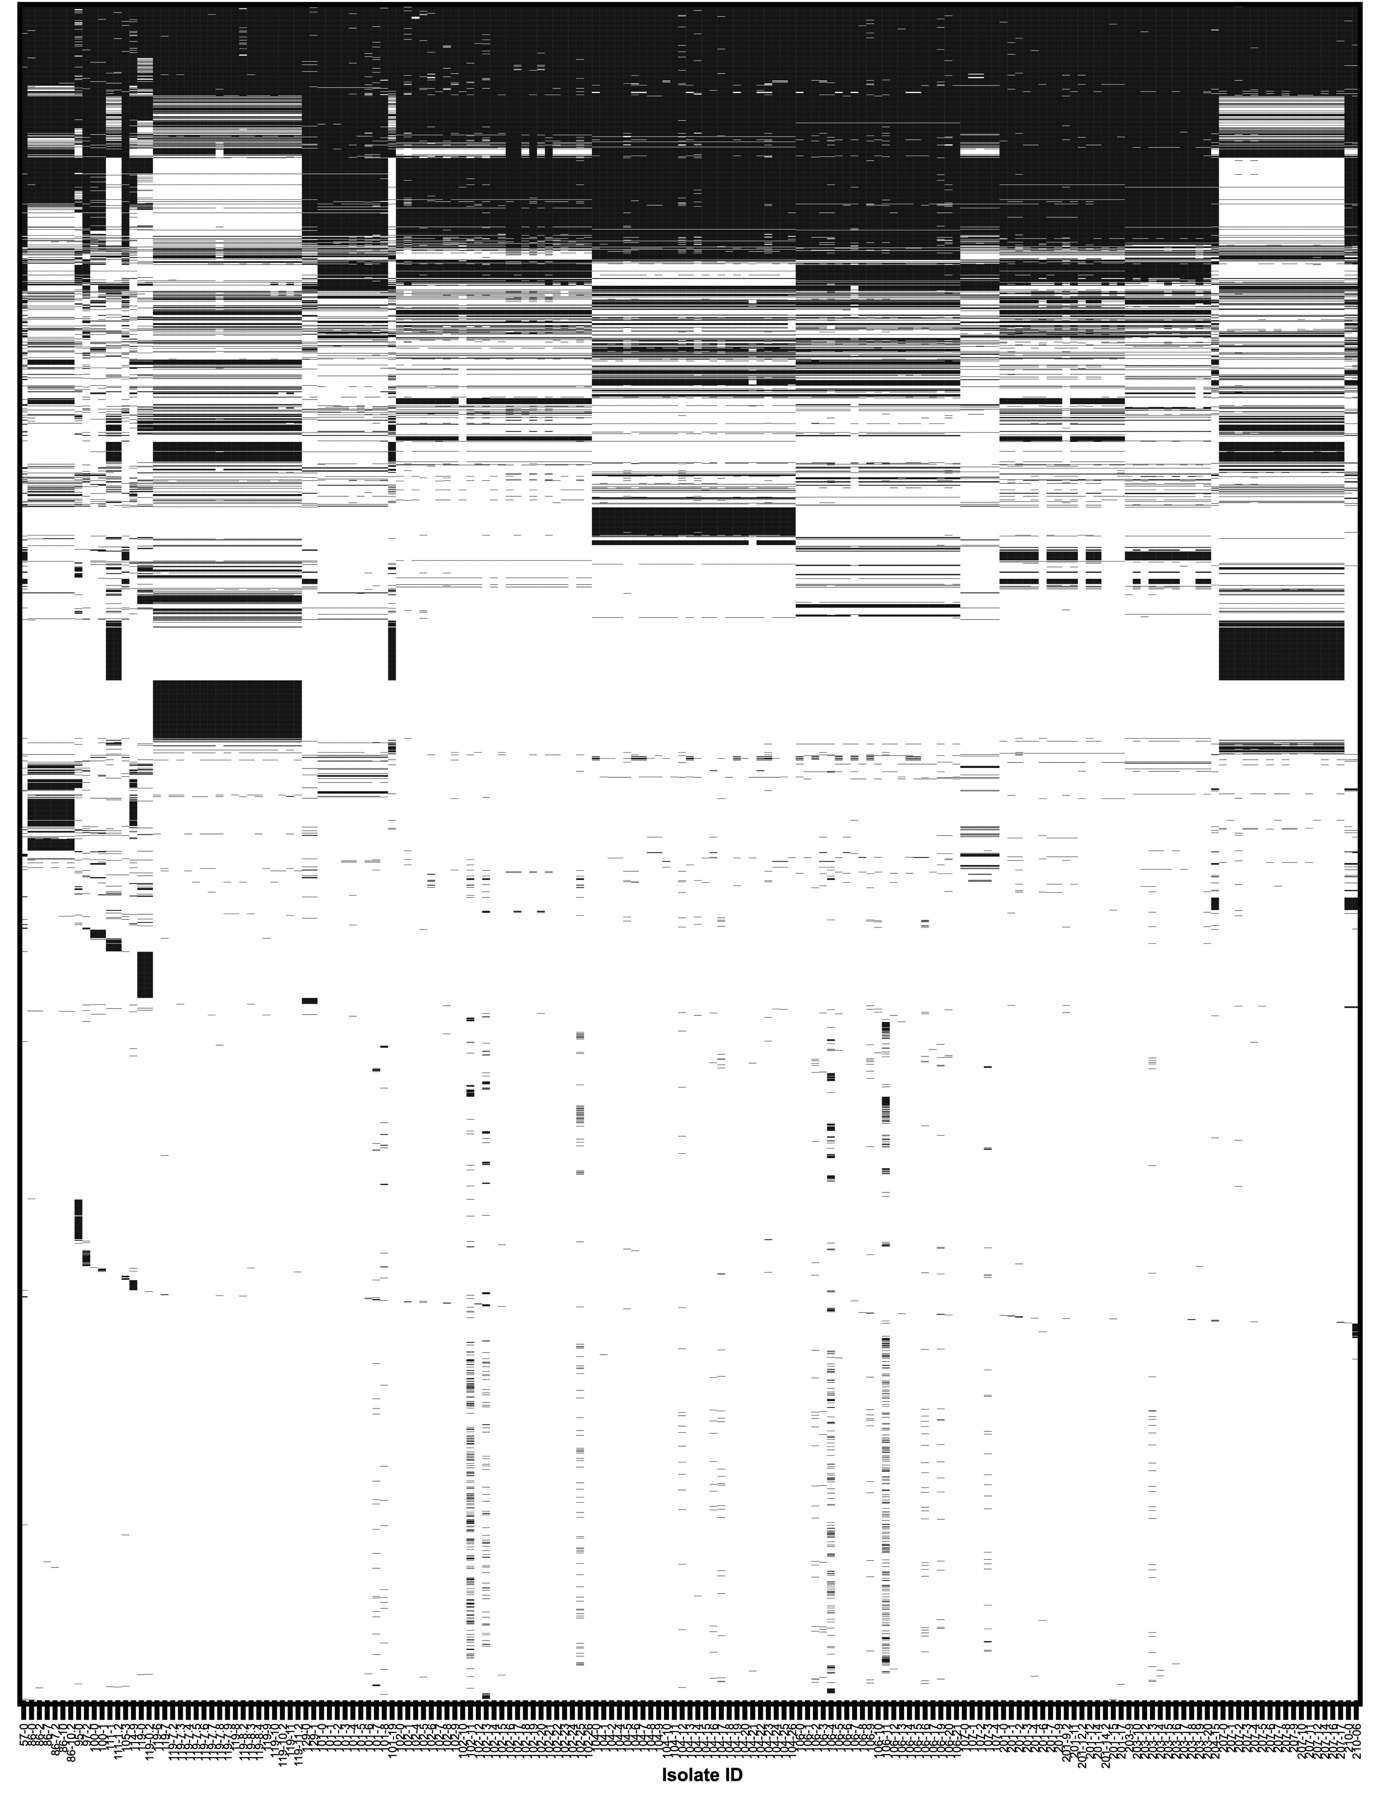


**Figure S4.** Accessory genomes of longitudinal *S. aureus* isolates. Strain ID is shown along the x-axis, and accessory gene presence (black) or absence (white) are shown vertically. Full list of genes in the accessory genome can be found in Supplemental **Table S4**.


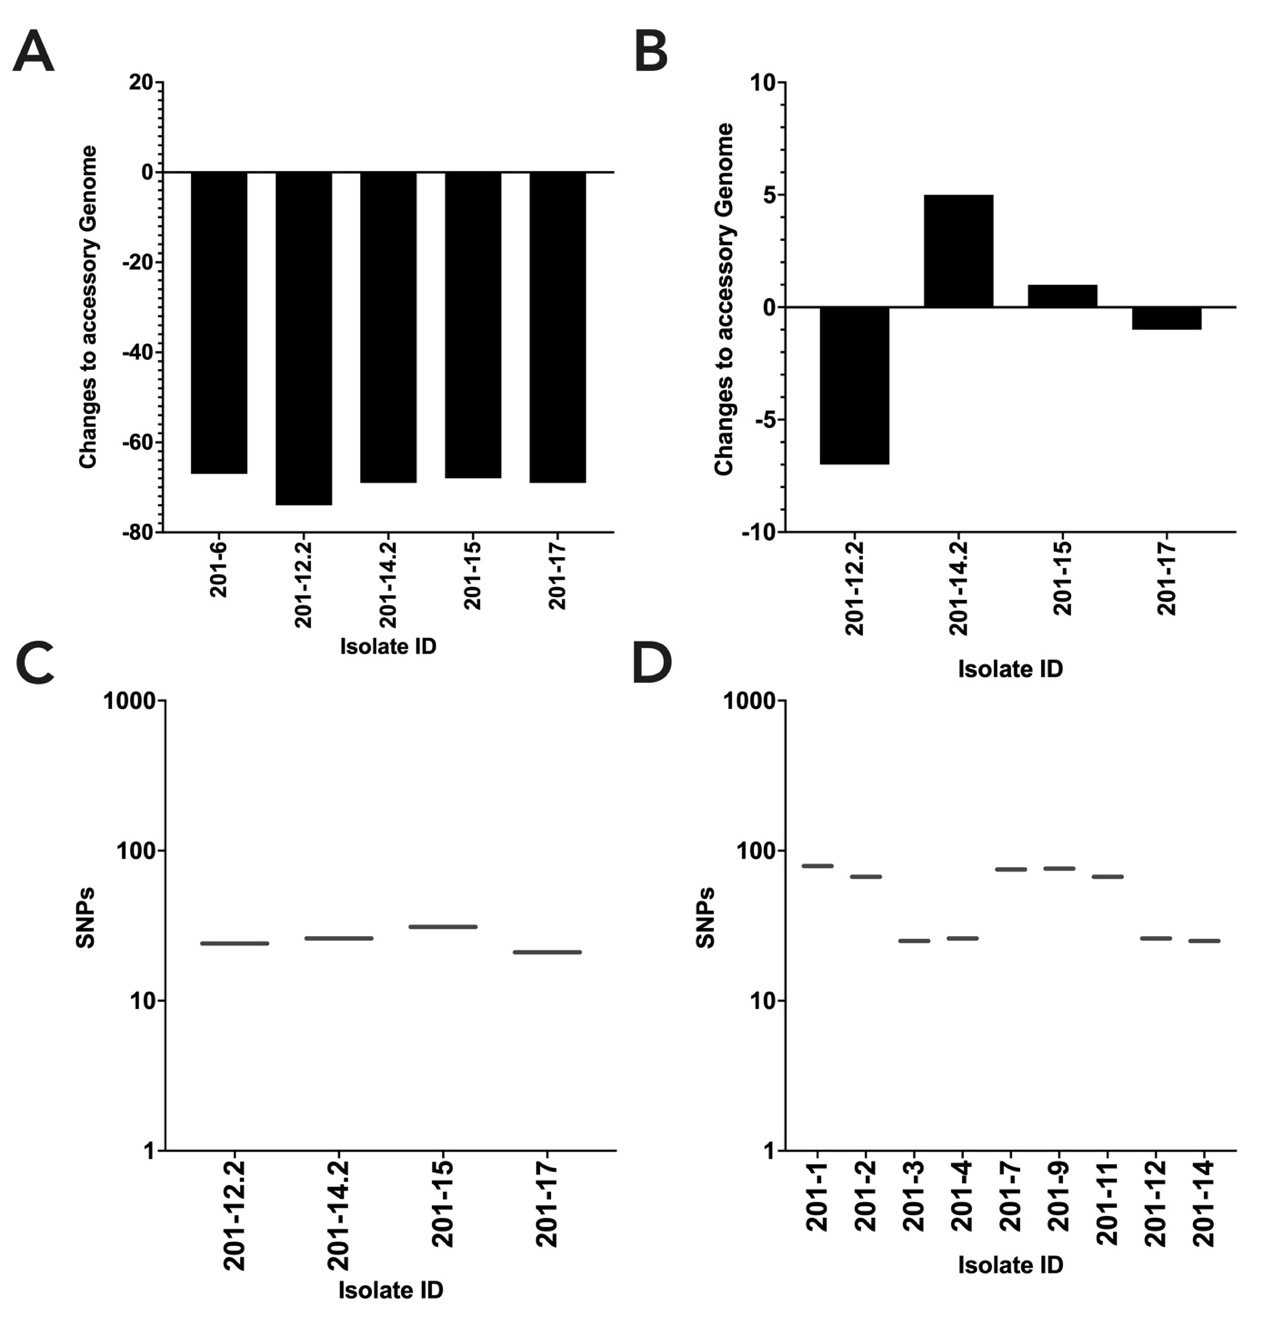


**Figure S5.** Single nucleotide polymorphism (SNP) and accessory genome analyses of NHR 201 methicillin susceptible *S. aureus* (MSSA) longitudinal isolates. **A)** Analysis of the changes in the accessory genome of the MSSA isolates compared to the methicillin resistant *S. aureus* (MRSA) index isolate 201-0: 201-6, 201-12.2, 201-14.2, 201-15, 201-17. Changes in the accessory genomes are shown as changes from the reference isolates: a positive number indicates a gain of genes, a negative number denotes a loss of genes, and a value of 0 represents no change. **B)** Analysis of the changes in the accessory genome of the MSSA isolates compared to the MSSA index isolate 201-6: 201-12.2, 201-14.2, 201-15, 201-17. **C)** SNP analyses of isolates from NHR 201 comparing the index MSSA isolate (201-6) to the rest of the MSSA isolates: 201-12.2 (n=2, 1 comparison), 201-14.2 (n=2, 1 comparison), 201-15 (n=2, 1 comparison), 201-17 (n=2, 1 comparison). **D)** SNP analyses of isolates from NHR 201 comparing the index MRSA isolate (201-0) to the rest of the MRSA isolates: 201-1 (n=2, 1 comparison), 201-2 (n=2, 1 comparison), 201-3 (n=2, 1 comparison), 201-7 (n=2, 1 comparison), 201-9 (n=2, 1 comparison), 201-11 (n=2, 1 comparison), 201-12 (n=2, 1 comparison), and 201-14 (n=2, 1 comparison. Box and whisker plots display the median as a solid bar within the interquartile range (IQR) box, with the whiskers representing the range.


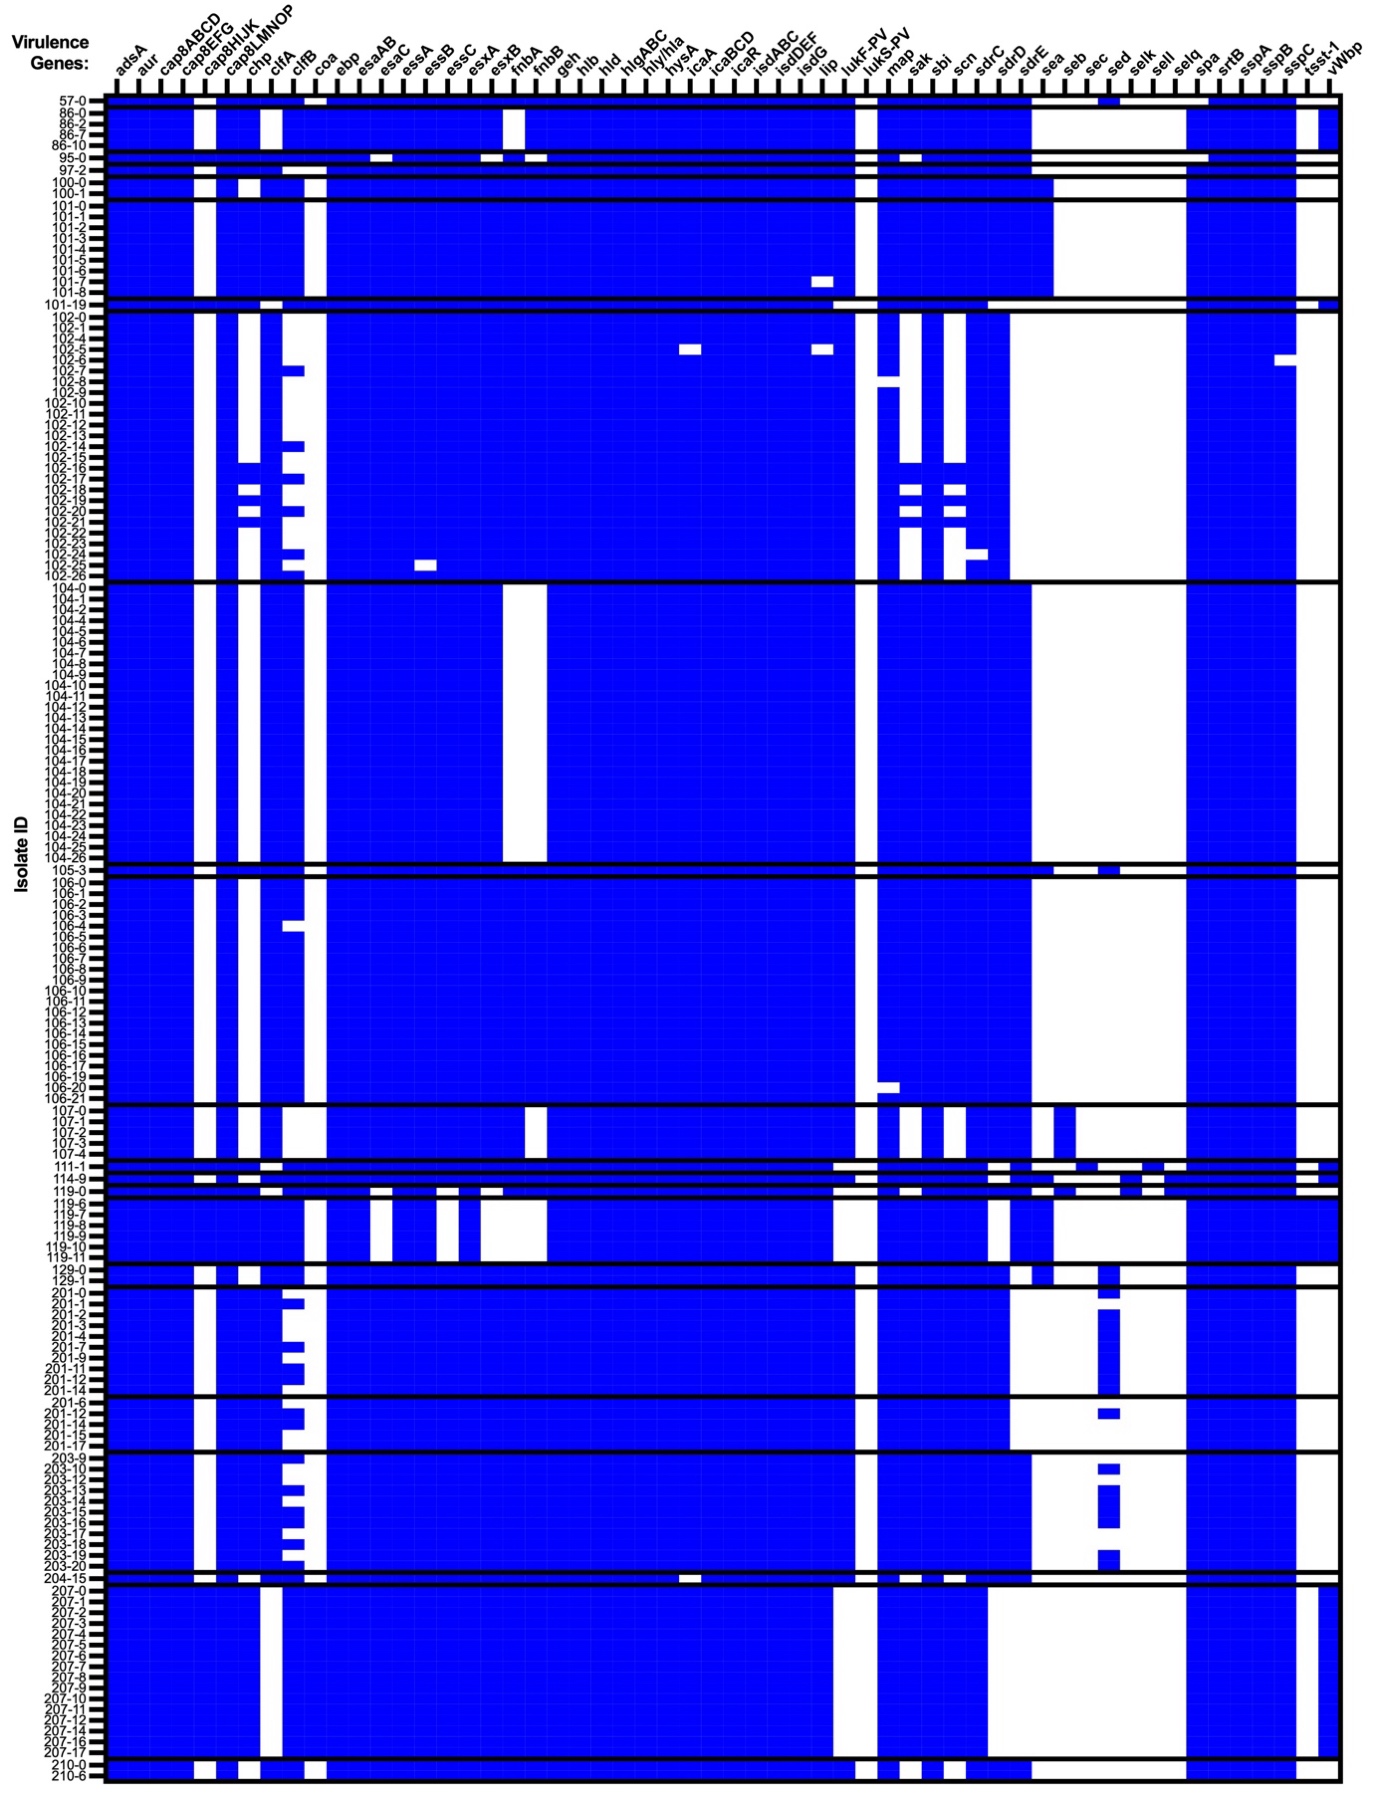


**Figure S6.** Virulence factor profiles of longitudinal *S. aureus* isolates. Virulence factors are shown on top x-axis and clinical isolates, organized by participant and chronologically, are shown on the left y-axis. Isolates with ST changes or different methicillin resistance profiles were organized separately.
