# Supplementary material for: Genomics Reveal Staphylococcus aureus Persists during Long-term Urinary Catheterization Despite Antimicrobial Therapy and Catheter Exchanges
Source: Research Square preprint supplement (doi:10.21203/rs.3.rs-6702271/v1), 2025-05-29
Supplement: Supplementary file 2 [file e893696bedc8b4b4889c6d08.xlsx]

## Sheet: Supplemental Glossary
Table_of_Context	Table_Title	Description_
Table S1	Isolate List	List of all isolates sequenced, including their cohort origin and its reference (PMID), classification as an index or sequential, if it was co-isolated with other S. aureus isolates, inclusion in final analysis, and sample type origin.
Table S2	Sequencing quality control, CheckM and MLST reports	CheckM report from short read sequencing sequences, including GC content and its standard deviation, genome size, the number of contigs/scaffolds, longest contig/scaffold, N50, predicted gene number. The MLST report include the sequence type and the allele for each of the seven housekeeping genes.
Table S3	Sequencing Quality Control report: BUSCOs report	The BUSCO reports on the quality of the assembly based on single-copy ortthologs conserved per species based on complete (single or duplicated), framented, and missing orthologs. The number of contigs, the length of the genome, and the N50 of the contigs are also reported.
Table S4	Roary Genome Report	Roary analysis reports showing the gene presence (1) and absence (0) in each genome comparing all isolates to each other. The report contains the number of isolates that share the same gene, sequences, and quality control for gene calling. Each strain has its own gene presence and absence column.
Table S5	Single Nucleotide Polymorphisms analysis	Snippy report of all comparisons showing number of single nuclotide polymorphisms. Reference and queried isolate identification as well as participant and isolate ST are shown.
Table S6	AMRFinder Antimicrobial Resistance	AMRFinder plus report of antimicrobial resistance factors in the AMRFinder plus Staphylococcus aureus dataset in a gene absence (0) and presence (1) matrix. The class and subclass of each antimicrobial that the gene confers resistance to is also reported. The total number of genes found in each isolate is found at the bottom of tha table.
Table S7	Minimum Inhibitory Concentraions	Minimum inhibitory concentrations of selected isolates showing the average OD of at least 4 techinical replicates at the susceptibility and resistant breakpoints. An average OD less than 0.1 was used as an indication of susceptibility.
Table S8	ABRicate Virulence Factors report	ABRicate virulence factor database identified in the each genome based on the VFDB dataset. The report includes the total number of factors identified and each gene is represented based on its coverage percent. Absence is depicted by ".".

## Sheet: Table S1
Isolate_ID	Strain Name	Cohort	PMID	Index	Sequential	Co-isolated	Inclusion_in_Longitudinal_Analysis	Strain_Origin	Sample_Type
MRSA-1369	MRSA-1369	Reference	36173194	NO	NO	NO	YES	MRSA-1369	Urine
86-0	HUC86-0	Urology Outpatient	38168042	YES	NO	NO	YES	HUC86-Collection_0	Catheter
86-2	HUC86-2	Urology Outpatient	38168042	NO	YES	NO	YES	HUC86-Collection_2	Catheter
95-0	HUC95-0	Urology Outpatient	38168042	YES	NO	NO	YES	HUC95-Collection_0	Urine
97-02	HUC97-02	Urology Outpatient	38168042	YES	NO	NO	YES	HUC97-Collection_2	Urine
100-0	HUC100-0	Urology Outpatient	38168042	YES	NO	NO	YES	HUC100-Collection_0	Catheter
100-1	HUC100-01	Urology Outpatient	38168042	NO	YES	NO	YES	HUC100-Collection_1	Catheter
111-1	HUC111-1	Urology Outpatient	34473649	YES	NO	YES	YES	HUC111-Collection_1	Catheter
111-1.2	HUC111-1U	Urology Outpatient	34473649	NO	NO	YES	NO	HUC111-Collection_1	Urine
86-10	HUC86-10	Urology Outpatient	38168042	NO	YES	YES	YES	HUC86-Collection_10	Catheter
86-10.2	HUC86-10CY	Urology Outpatient	38168043	NO	YES	YES	NO	HUC86-Collection_10	Catheter
105-3	HUC105-3	Urology Outpatient	34473649	YES	NO	NO	YES	HUC105-Collection_3	Urine
86-7	HUC86-7	Urology Outpatient	38168042	NO	YES	YES	YES	HUC86-Collection_7	Catheter
86-7.2	HUC86-7U	Urology Outpatient	38168042	NO	YES	YES	NO	HUC86-Collection_7	Urine
114-9	HUC114-9	Urology Outpatient	34473649	YES	NO	NO	YES	HUC114-Collection_9	Urine
119-7.3	HUC119-7CWM	Urology Outpatient	34473649	NO	NO	YES	NO	HUC119-Collection_7	Catheter
119-7.8	HUC119-7U	Urology Outpatient	34473649	NO	YES	YES	NO	HUC119-Collection_7	Urine
129-0	HUC129-0	Urology Outpatient	34473649	YES	NO	NO	YES	HUC129-Collection_0	Catheter
119-8.3	HUC119-8U	Urology Outpatient	34473649	NO	YES	YES	NO	HUC119-Collection_8	Urine
129-1	HUC129-1	Urology Outpatient	34473649	NO	YES	NO	YES	HUC129-Collection_1	Catheter
119-0	HUC119-0	Urology Outpatient	34473649	YES	NO	YES	YES	HUC119-Collection_0	Catheter
119-0.2	HUC119-0U	Urology Outpatient	34473649	NO	YES	YES	NO	HUC119-Collection_0	Urine
119-8.2	HUC119-8UR	Urology Outpatient	34473649	NO	YES	YES	NO	HUC119-Collection_8	Urine
119-6	HUC119-6	Urology Outpatient	34473649	NO	YES	NO	YES	HUC119-Collection_6	Catheter
119-7	HUC119-7	Urology Outpatient	34473649	NO	YES	YES	NO	HUC119-Collection_7	Catheter
119-7.4	HUC119-7CM	Urology Outpatient	38168042	NO	YES	YES	NO	HUC119-Collection_7	Catheter
119-7.2	HUC119-7CTW	Urology Outpatient	34473649	NO	YES	YES	YES	HUC119-Collection_7	Catheter
119-7.5	HUC119-7CTY	Urology Outpatient	34473649	YES	NO	YES	NO	HUC119-Collection_7	Catheter
119-8.4	HUC119-8UY	Urology Outpatient	34473649	NO	YES	YES	NO	HUC119-Collection_8	Urine
119-9	HUC119-9	Urology Outpatient	34473649	NO	YES	NO	YES	HUC119-Collection_9	Urine
119-10.2	HUC119-10UW	Urology Outpatient	34473649	NO	YES	YES	NO	HUC119-Collection_10	Urine
119-11.2	HUC119-11CM	Urology Outpatient	34473649	NO	YES	YES	YES	HUC119-Collection_11	Catheter
119-10	HUC119-10	Urology Outpatient	34473649	NO	YES	YES	YES	HUC119-Collection_10	Catheter
119-11	HUC119-11	Urology Outpatient	34473649	NO	YES	YES	NO	HUC119-Collection_11	Catheter
119-7.7	HUC119-7UM	Urology Outpatient	34473649	NO	YES	YES	NO	HUC119-Collection_7	Urine
119-7.9	HUC119-7UY	Urology Outpatient	34473649	NO	YES	YES	NO	HUC119-Collection_7	Urine
119-7.6	HUC119-7CW	Urology Outpatient	34473649	NO	YES	YES	NO	HUC119-Collection_7	Catheter
119-8	HUC119-8	Urology Outpatient	34473649	NO	YES	YES	YES	HUC119-Collection_8	Catheter
57-0	HUC57-0	Urology Outpatient	31792577	YES	NO	NO	YES	HUC57-Collection_0	Catheter
101-0	101-0	Nursing Home Residents	34473649	YES	NO	NO	YES	B-Visit_0	Urine
101-1	101-1	Nursing Home Residents	34473649	NO	YES	NO	YES	B-Visit_1	Urine
101-3	101-3	Nursing Home Residents	34473649	NO	YES	NO	YES	B-Visit_3	Urine
101-4	101-4	Nursing Home Residents	34473649	NO	YES	NO	YES	B-Visit_4	Urine
101-5	101-5	Nursing Home Residents	34473649	NO	YES	NO	YES	B-Visit_5	Urine
101-6	101-6	Nursing Home Residents	34473649	NO	YES	NO	YES	B-Visit_6	Urine
101-7	101-7	Nursing Home Residents	34473649	NO	YES	NO	YES	B-Visit_7	Urine
101-8	101-8	Nursing Home Residents	34473649	NO	YES	NO	YES	B-Visit_8	Urine
101-19	101-19	Nursing Home Residents	34473649	YES	NO	NO	YES	B-Visit_19	Urine
101-2	101-2	Nursing Home Residents	34473649	NO	YES	NO	YES	B-Visit_2	Urine
102-0	102-0	Nursing Home Residents	34473649	YES	NO	NO	YES	A-Visit_0	Urine
102-1	102-1	Nursing Home Residents	34473649	NO	YES	NO	YES	A-Visit_1	Urine
102-21	102-21	Nursing Home Residents	34473649	NO	YES	NO	YES	A-Visit_21	Urine
102-22	102-22	Nursing Home Residents	34473649	NO	YES	NO	YES	A-Visit_22	Urine
102-23	102-23	Nursing Home Residents	34473649	NO	YES	NO	YES	A-Visit_23	Urine
102-24	102-24	Nursing Home Residents	34473649	NO	YES	NO	YES	A-Visit_24	Urine
102-25	102-25	Nursing Home Residents	34473649	NO	YES	NO	YES	A-Visit_25	Urine
102-26	102-26	Nursing Home Residents	34473649	NO	YES	NO	YES	A-Visit_26	Urine
102-4	102-4	Nursing Home Residents	34473649	NO	YES	NO	YES	A-Visit_4	Urine
102-5	102-5	Nursing Home Residents	34473649	NO	YES	NO	YES	A-Visit_5	Urine
102-6	102-6	Nursing Home Residents	34473649	NO	YES	NO	YES	A-Visit_6	Urine
102-7	102-7	Nursing Home Residents	34473649	NO	YES	NO	YES	A-Visit_7	Urine
102-8	102-8	Nursing Home Residents	34473649	NO	YES	NO	YES	A-Visit_8	Urine
102-9	102-9	Nursing Home Residents	34473649	NO	YES	NO	YES	A-Visit_9	Urine
102-10	102-10	Nursing Home Residents	34473649	NO	YES	NO	YES	A-Visit_10	Urine
102-11	102-11	Nursing Home Residents	34473649	NO	YES	NO	YES	A-Visit_11	Urine
102-12	102-12	Nursing Home Residents	34473649	NO	YES	NO	YES	A-Visit_12	Urine
102-13	102-13	Nursing Home Residents	34473649	NO	YES	NO	YES	A-Visit_13	Urine
102-14	102-14	Nursing Home Residents	34473649	NO	YES	NO	YES	A-Visit_14	Urine
102-15	102-15	Nursing Home Residents	34473649	NO	YES	NO	YES	A-Visit_15	Urine
102-16	102-16	Nursing Home Residents	34473649	NO	YES	NO	YES	A-Visit_16	Urine
102-17	102-17	Nursing Home Residents	34473649	NO	YES	NO	YES	A-Visit_17	Urine
102-18	102-18	Nursing Home Residents	34473649	NO	YES	NO	YES	A-Visit_18	Urine
102-19	102-19	Nursing Home Residents	34473649	NO	YES	NO	YES	A-Visit_19	Urine
102-20	102-20	Nursing Home Residents	34473649	NO	YES	NO	YES	A-Visit_20	Urine
104-0	104-0	Nursing Home Residents	34473649	YES	NO	NO	YES	C-Visit_0	Urine
104-1	104-1	Nursing Home Residents	34473649	NO	YES	NO	YES	C-Visit_1	Urine
104-13	104-13	Nursing Home Residents	34473649	NO	YES	NO	YES	C-Visit_13	Urine
104-21	104-21	Nursing Home Residents	34473649	NO	YES	NO	YES	C-Visit_21	Urine
104-22	104-22	Nursing Home Residents	34473649	NO	YES	NO	YES	C-Visit_22	Urine
104-23	104-23	Nursing Home Residents	34473649	NO	YES	NO	YES	C-Visit_23	Urine
104-24	104-24	Nursing Home Residents	34473649	NO	YES	NO	YES	C-Visit_24	Urine
104-25	104-25	Nursing Home Residents	34473649	NO	YES	NO	YES	C-Visit_25	Urine
104-26	104-26	Nursing Home Residents	34473649	NO	YES	NO	YES	C-Visit_26	Urine
104-2	104-2	Nursing Home Residents	34473649	NO	YES	NO	YES	C-Visit_2	Urine
104-4	104-4	Nursing Home Residents	34473649	NO	YES	NO	YES	C-Visit_4	Urine
104-5	104-5	Nursing Home Residents	34473649	NO	YES	NO	YES	C-Visit_5	Urine
104-6	104-6	Nursing Home Residents	34473649	NO	YES	NO	YES	C-Visit_6	Urine
104-7	104-7	Nursing Home Residents	34473649	NO	YES	NO	YES	C-Visit_7	Urine
104-8	104-8	Nursing Home Residents	34473649	NO	YES	NO	YES	C-Visit_8	Urine
104-9	104-9	Nursing Home Residents	34473649	NO	YES	NO	YES	C-Visit_9	Urine
104-10	104-10	Nursing Home Residents	34473649	NO	YES	NO	YES	C-Visit_10	Urine
104-11	104-11	Nursing Home Residents	34473649	NO	YES	NO	YES	C-Visit_11	Urine
104-12	104-12	Nursing Home Residents	34473649	NO	YES	NO	YES	C-Visit_12	Urine
104-14	104-14	Nursing Home Residents	34473649	NO	YES	NO	YES	C-Visit_14	Urine
104-15	104-15	Nursing Home Residents	34473649	NO	YES	NO	YES	C-Visit_15	Urine
104-16	104-16	Nursing Home Residents	34473649	NO	YES	NO	YES	C-Visit_16	Urine
104-17	104-17	Nursing Home Residents	34473649	NO	YES	NO	YES	C-Visit_17	Urine
104-18	104-18	Nursing Home Residents	34473649	NO	YES	NO	YES	C-Visit_18	Urine
104-19	104-19	Nursing Home Residents	34473649	NO	YES	NO	YES	C-Visit_19	Urine
104-20	104-20	Nursing Home Residents	34473649	NO	YES	NO	YES	C-Visit_20	Urine
106-0	106-0	Nursing Home Residents	34473649	YES	NO	NO	YES	H-Visit_0	Urine
106-1	106-1	Nursing Home Residents	34473649	NO	YES	NO	YES	H-Visit_1	Urine
106-11	106-11	Nursing Home Residents	34473649	NO	YES	NO	YES	H-Visit_11	Urine
106-14	106-14	Nursing Home Residents	34473649	NO	YES	NO	YES	H-Visit_14	Urine
106-15	106-15	Nursing Home Residents	34473649	NO	YES	NO	YES	H-Visit_15	Urine
106-16	106-16	Nursing Home Residents	34473649	NO	YES	NO	YES	H-Visit_16	Urine
106-17	106-17	Nursing Home Residents	34473649	NO	YES	NO	YES	H-Visit_17	Urine
106-19	106-19	Nursing Home Residents	34473649	NO	YES	NO	YES	H-Visit_19	Urine
106-20	106-20	Nursing Home Residents	34473649	NO	YES	NO	YES	H-Visit_20	Urine
106-21	106-21	Nursing Home Residents	34473649	NO	YES	NO	YES	H-Visit_21	Urine
106-2	106-2	Nursing Home Residents	34473649	NO	YES	NO	YES	H-Visit_2	Urine
106-3	106-3	Nursing Home Residents	34473649	NO	YES	NO	YES	H-Visit_3	Urine
106-4	106-4	Nursing Home Residents	34473649	NO	YES	NO	YES	H-Visit_4	Urine
106-5	106-5	Nursing Home Residents	34473649	NO	YES	NO	YES	H-Visit_5	Urine
106-6	106-6	Nursing Home Residents	34473649	NO	YES	NO	YES	H-Visit_6	Urine
106-7	106-7	Nursing Home Residents	34473649	NO	YES	NO	YES	H-Visit_7	Urine
106-8	106-8	Nursing Home Residents	34473649	NO	YES	NO	YES	H-Visit_8	Urine
106-9	106-9	Nursing Home Residents	34473649	NO	YES	NO	YES	H-Visit_9	Urine
106-10	106-10	Nursing Home Residents	34473649	NO	YES	NO	YES	H-Visit_10	Urine
106-12	106-12	Nursing Home Residents	34473649	NO	YES	NO	YES	H-Visit_12	Urine
106-13	106-13	Nursing Home Residents	34473649	NO	YES	NO	YES	H-Visit_13	Urine
107-0	107-0	Nursing Home Residents	34473649	YES	NO	NO	YES	K-Visit_0	Urine
107-1	107-1	Nursing Home Residents	34473649	NO	YES	NO	YES	K-Visit_1	Urine
107-2	107-2	Nursing Home Residents	34473649	NO	YES	NO	YES	K-Visit_2	Urine
107-3	107-3	Nursing Home Residents	34473649	NO	YES	NO	YES	K-Visit_3	Urine
107-4	107-4	Nursing Home Residents	34473649	NO	YES	NO	YES	K-Visit_4	Urine
201-0	201-0	Nursing Home Residents	34473649	YES	NO	NO	YES	G-Visit_0	Urine
201-1	201-1	Nursing Home Residents	34473649	NO	YES	NO	YES	G-Visit_1	Urine
201-11	201-11	Nursing Home Residents	34473649	NO	YES	NO	YES	G-Visit_11	Urine
201-12.2	201-12-CNA1	Nursing Home Residents	34473649	NO	YES	NO	YES	G-Visit_12	Urine
201-12	201-12-CNA2	Nursing Home Residents	34473649	NO	YES	NO	YES	G-Visit_12	Urine
201-14	201-14	Nursing Home Residents	34473649	NO	YES	NO	YES	G-Visit_14	Urine
201-14.2	201-14-CNA3	Nursing Home Residents	34473649	NO	YES	NO	YES	G-Visit_14	Urine
201-15	201-15	Nursing Home Residents	34473649	NO	YES	NO	YES	G-Visit_15	Urine
201-17	201-17	Nursing Home Residents	34473649	NO	YES	NO	YES	G-Visit_17	Urine
201-2	201-2	Nursing Home Residents	34473649	NO	YES	NO	YES	G-Visit_2	Urine
201-3	201-3	Nursing Home Residents	34473649	NO	YES	NO	YES	G-Visit_3	Urine
201-4	201-4	Nursing Home Residents	34473649	NO	YES	NO	YES	G-Visit_4	Urine
201-6	201-6	Nursing Home Residents	34473649	NO	YES	NO	YES	G-Visit_6	Urine
201-7	201-7	Nursing Home Residents	34473649	NO	YES	NO	YES	G-Visit_7	Urine
201-9	201-9-CNA1	Nursing Home Residents	34473649	NO	YES	NO	YES	G-Visit_9	Urine
201-9.2	201-9-CNA2	Nursing Home Residents	34473649	NO	YES	NO	NO	G-Visit_9	Urine
203-20	203-20	Nursing Home Residents	34473649	NO	YES	NO	YES	F-Visit_20	Urine
203-9	203-9	Nursing Home Residents	34473649	YES	NO	NO	YES	F-Visit_9	Urine
203-10	203-10	Nursing Home Residents	34473649	NO	YES	NO	YES	F-Visit_10	Urine
203-12	203-12	Nursing Home Residents	34473649	NO	YES	NO	YES	F-Visit_12	Urine
203-13	203-13	Nursing Home Residents	34473649	NO	YES	NO	YES	F-Visit_13	Urine
203-14	203-14	Nursing Home Residents	34473649	NO	YES	NO	YES	F-Visit_14	Urine
203-15	203-15	Nursing Home Residents	34473649	NO	YES	NO	YES	F-Visit_15	Urine
203-16	203-16	Nursing Home Residents	34473649	NO	YES	NO	YES	F-Visit_16	Urine
203-17	203-17	Nursing Home Residents	34473649	NO	YES	NO	YES	F-Visit_17	Urine
203-18	203-18	Nursing Home Residents	34473649	NO	YES	NO	YES	F-Visit_18	Urine
203-19	203-19	Nursing Home Residents	34473649	NO	YES	NO	YES	F-Visit_19	Urine
204-15	204-15	Nursing Home Residents	34473649	YES	NO	NO	YES	E-Visit_15	Urine
207-0	207-0	Nursing Home Residents	34473649	YES	YES	NO	YES	I-Visit_0	Urine
207-1	207-1	Nursing Home Residents	34473649	NO	YES	NO	YES	I-Visit_1	Urine
207-8	207-8	Nursing Home Residents	34473649	NO	YES	NO	YES	I-Visit_8	Urine
207-9	207-9	Nursing Home Residents	34473649	NO	YES	NO	YES	I-Visit_9	Urine
207-10	207-10	Nursing Home Residents	34473649	NO	YES	NO	YES	I-Visit_10	Urine
207-11	207-11	Nursing Home Residents	34473649	NO	YES	NO	YES	I-Visit_11	Urine
207-12	207-12	Nursing Home Residents	34473649	NO	YES	NO	YES	I-Visit_12	Urine
207-14	207-14	Nursing Home Residents	34473649	NO	YES	NO	YES	I-Visit_14	Urine
207-16	207-16	Nursing Home Residents	34473649	NO	YES	NO	YES	I-Visit_16	Urine
207-17	207-17	Nursing Home Residents	34473649	NO	YES	NO	YES	I-Visit_17	Urine
207-2	207-2	Nursing Home Residents	34473649	NO	YES	NO	YES	I-Visit_2	Urine
207-3	207-3	Nursing Home Residents	34473649	NO	YES	NO	YES	I-Visit_3	Urine
207-4	207-4	Nursing Home Residents	34473649	NO	YES	NO	YES	I-Visit_4	Urine
207-5	207-5	Nursing Home Residents	34473649	NO	YES	NO	YES	I-Visit_5	Urine
207-6	207-6	Nursing Home Residents	34473649	NO	YES	NO	YES	I-Visit_6	Urine
207-7	207-7	Nursing Home Residents	34473649	NO	YES	NO	YES	I-Visit_7	Urine
210-0	210-0	Nursing Home Residents	34473649	YES	NO	NO	YES	J-Visit_0	Urine
210-6	210-6	Nursing Home Residents	34473649	NO	YES	NO	YES	J-Visit_6	Urine

## Sheet: Table S2
Isolate_ID	GC	GC_std	Genome_size	#_ambiguous_bases	#_scaffolds	#_contigs	Longest_scaffold	Longest_contig	N50_(scaffolds)	N50_(contigs)	Mean_scaffold_length	Mean_contig_length	Coding_density	Translation_table	#_predicted_genes	ST	arcC	aroE	glpF	gmk	pta	tpi	yqiL
100-0	0.326722	0.0607505	2729107	0	34	34	502983	502983	280680	280680	80267.9	80267.9	0.840702	11	2507	840	arcC(1)	aroE(145)	glpF(1)	gmk(4)	pta(12)	tpi(1)	yqiL(10)
100-1	0.326944	0.0524915	2771877	0	38	38	448155	448155	281641	281641	72944.1	72944.1	0.842042	11	2571	840	arcC(1)	aroE(145)	glpF(1)	gmk(4)	pta(12)	tpi(1)	yqiL(10)
101-0	0.32763	0.0616992	2780716	0	26	26	544346	544346	399244	399244	106951	106951	0.844553	11	2605	5	arcC(1)	aroE(4)	glpF(1)	gmk(4)	pta(12)	tpi(1)	yqiL(10)
101-1	0.327658	0.0465496	2781982	0	31	31	995895	995895	363258	363258	89741.4	89741.4	0.844307	11	2608	5	arcC(1)	aroE(4)	glpF(1)	gmk(4)	pta(12)	tpi(1)	yqiL(10)
101-19	0.327657	0.0496715	2727331	0	32	32	442167	442167	301683	301683	85229.1	85229.1	0.845096	11	2568	45	arcC(10)	aroE(14)	glpF(8)	gmk(6)	pta(10)	tpi(3)	yqiL(2)
101-2	0.32756	0.0470306	2780790	0	32	32	516817	516817	450518	450518	86899.7	86899.7	0.844761	11	2608	5	arcC(1)	aroE(4)	glpF(1)	gmk(4)	pta(12)	tpi(1)	yqiL(10)
101-3	0.327646	0.0453718	2781239	0	32	32	995895	995895	360221	360221	86913.7	86913.7	0.844615	11	2609	5	arcC(1)	aroE(4)	glpF(1)	gmk(4)	pta(12)	tpi(1)	yqiL(10)
101-4	0.327651	0.047549	2778850	0	44	44	545422	545422	206723	206723	63155.7	63155.7	0.84477	11	2616	5	arcC(1)	aroE(4)	glpF(1)	gmk(4)	pta(12)	tpi(1)	yqiL(10)
101-5	0.327592	0.0479459	2780249	0	32	32	994313	994313	348786	348786	86882.8	86882.8	0.844656	11	2609	5	arcC(1)	aroE(4)	glpF(1)	gmk(4)	pta(12)	tpi(1)	yqiL(10)
101-6	0.32794	0.0294641	2758926	0	40	40	390459	390459	206333	206333	68973.1	68973.1	0.845687	11	2589	5	arcC(1)	aroE(4)	glpF(1)	gmk(4)	pta(12)	tpi(1)	yqiL(10)
101-7	0.327513	0.0230478	2809986	0	78	78	231515	231515	66473	66473	36025.5	36025.5	0.844791	11	2665	5(1LV)	arcC(700?)	aroE(4)	glpF(1)	gmk(4)	pta(12)	tpi(1)	yqiL(10)
101-8	0.327317	0.0257445	2802989	0	58	58	359035	359035	108860	108860	48327.4	48327.4	0.843721	11	2641	5	arcC(1)	aroE(4)	glpF(1)	gmk(4)	pta(12)	tpi(1)	yqiL(10)
102-0	0.327705	0.0463861	2744549	0	28	28	381378	381378	220193	220193	98019.6	98019.6	0.843397	11	2551	5	arcC(1)	aroE(4)	glpF(1)	gmk(4)	pta(12)	tpi(1)	yqiL(10)
102-1	0.328004	0.048468	2722637	0	41	41	327739	327739	156843	156843	66405.8	66405.8	0.844252	11	2531	5	arcC(1)	aroE(4)	glpF(1)	gmk(4)	pta(12)	tpi(1)	yqiL(10)
102-10	0.327364	0.0550186	2702417	0	31	31	512159	512159	204932	204932	87174.7	87174.7	0.841767	11	2488	5	arcC(1)	aroE(4)	glpF(1)	gmk(4)	pta(12)	tpi(1)	yqiL(10)
102-11	0.327357	0.0242784	3012113	0	62	62	449122	449122	104118	104118	48582.5	48582.5	0.845168	11	2833	5(1LV)	arcC(700?)	aroE(4,4)	glpF(1)	gmk(4)	pta(12)	tpi(1)	yqiL(10)
102-12	0.327641	0.0331951	2743263	0	31	31	343672	343672	171224	171224	88492.4	88492.4	0.843478	11	2552	5	arcC(1)	aroE(4)	glpF(1)	gmk(4)	pta(12)	tpi(1)	yqiL(10)
102-13	0.327845	0.0362169	2892725	0	66	66	258103	258103	60658	60658	43829.2	43829.2	0.84398	11	2698	5(1LV)	arcC(700?)	aroE(4)	glpF(1)	gmk(4)	pta(12)	tpi(1)	yqiL(10)
102-14	0.327683	0.0454901	2744618	0	29	29	381378	381378	206514	206514	94642	94642	0.843482	11	2552	5	arcC(1)	aroE(4)	glpF(1)	gmk(4)	pta(12)	tpi(1)	yqiL(10)
102-15	0.327723	0.0514757	2741886	0	38	38	344142	344142	170901	170901	72154.9	72154.9	0.843464	11	2552	5	arcC(1)	aroE(4)	glpF(1)	gmk(4)	pta(12)	tpi(1)	yqiL(10)
102-16	0.327738	0.0529366	2784359	0	33	33	390983	390983	220193	220193	84374.5	84374.5	0.843732	11	2610	5	arcC(1)	aroE(4)	glpF(1)	gmk(4)	pta(12)	tpi(1)	yqiL(10)
102-17	0.327743	0.0507002	2785235	0	36	36	500774	500774	220193	220193	77367.6	77367.6	0.843384	11	2609	5	arcC(1)	aroE(4)	glpF(1)	gmk(4)	pta(12)	tpi(1)	yqiL(10)
102-18	0.327622	0.0471616	2744054	0	29	29	512159	512159	220193	220193	94622.6	94622.6	0.843564	11	2551	5	arcC(1)	aroE(4)	glpF(1)	gmk(4)	pta(12)	tpi(1)	yqiL(10)
102-19	0.327727	0.0408857	2781575	0	42	42	330824	330824	199763	199763	66228	66228	0.843895	11	2611	5	arcC(1)	aroE(4)	glpF(1)	gmk(4)	pta(12)	tpi(1)	yqiL(10)
102-20	0.327627	0.0575177	2743735	0	29	29	500774	500774	220193	220193	94611.6	94611.6	0.843441	11	2549	5	arcC(1)	aroE(4)	glpF(1)	gmk(4)	pta(12)	tpi(1)	yqiL(10)
102-21	0.327671	0.0309774	2783093	0	41	41	339109	339109	220188	220188	67880.3	67880.3	0.843261	11	2614	5	arcC(1)	aroE(4)	glpF(1)	gmk(4)	pta(12)	tpi(1)	yqiL(10)
102-22	0.327601	0.029381	2743793	0	45	45	231337	231337	155624	155624	60973.2	60973.2	0.843366	11	2559	5	arcC(1)	aroE(4)	glpF(1)	gmk(4)	pta(12)	tpi(1)	yqiL(10)
102-23	0.327696	0.0418347	2744883	0	35	35	381378	381378	165394	165394	78425.2	78425.2	0.843524	11	2557	5	arcC(1)	aroE(4)	glpF(1)	gmk(4)	pta(12)	tpi(1)	yqiL(10)
102-24	0.327688	0.0564191	2741401	0	29	29	500774	500774	220193	220193	94531.1	94531.1	0.843649	11	2547	5	arcC(1)	aroE(4)	glpF(1)	gmk(4)	pta(12)	tpi(1)	yqiL(10)
102-25	0.327755	0.0388807	2853320	0	69	69	218052	218052	88259	88259	41352.5	41352.5	0.84366	11	2669	5(1LV)	arcC(700?)	aroE(4)	glpF(1)	gmk(4)	pta(12)	tpi(1)	yqiL(10)
102-26	0.327699	0.0490426	2744408	0	26	26	500701	500701	220193	220193	105554	105554	0.843098	11	2547	5	arcC(1)	aroE(4)	glpF(1)	gmk(4)	pta(12)	tpi(1)	yqiL(10)
102-4	0.327664	0.0493506	2737629	0	27	27	375321	375321	220193	220193	101394	101394	0.843699	11	2549	5	arcC(1)	aroE(4)	glpF(1)	gmk(4)	pta(12)	tpi(1)	yqiL(10)
102-5	0.327572	0.0330576	2750901	0	67	67	185059	185059	81304	81304	41058.2	41058.2	0.842834	11	2573	5	arcC(1)	aroE(4)	glpF(1)	gmk(4)	pta(12)	tpi(1)	yqiL(10)
102-6	0.327657	0.029539	2742346	0	46	46	338824	338824	104118	104118	59616.2	59616.2	0.84365	11	2558	-	arcC(700?)	aroE(4)	glpF(1)	gmk(4)	pta(12)	tpi(1)	yqiL(10)
102-7	0.327698	0.047279	2744619	0	27	27	500774	500774	220193	220193	101653	101653	0.843526	11	2551	5	arcC(1)	aroE(4)	glpF(1)	gmk(4)	pta(12)	tpi(1)	yqiL(10)
102-8	0.327649	0.0354581	2743088	0	56	56	199763	199763	96555	96555	48983.7	48983.7	0.843498	11	2567	5	arcC(1)	aroE(4)	glpF(1)	gmk(4)	pta(12)	tpi(1)	yqiL(10)
102-9	0.327705	0.0420968	2743503	0	35	35	289924	289924	199763	199763	78385.8	78385.8	0.842781	11	2550	5	arcC(1)	aroE(4)	glpF(1)	gmk(4)	pta(12)	tpi(1)	yqiL(10)
104-0	0.326108	0.0373054	2876663	0	51	51	407053	407053	150961	150961	56405.2	56405.2	0.838519	11	2717	5	arcC(1)	aroE(4)	glpF(1)	gmk(4)	pta(12)	tpi(1)	yqiL(10)
104-1	0.326123	0.045815	2876730	0	52	52	407053	407053	154924	154924	55321.7	55321.7	0.838947	11	2720	5	arcC(1)	aroE(4)	glpF(1)	gmk(4)	pta(12)	tpi(1)	yqiL(10)
104-10	0.326118	0.0386226	2877493	0	48	48	553797	553797	154942	154942	59947.8	59947.8	0.838424	11	2718	5	arcC(1)	aroE(4)	glpF(1)	gmk(4)	pta(12)	tpi(1)	yqiL(10)
104-11	0.326124	0.0386389	2877071	0	48	48	706820	706820	154924	154924	59939	59939	0.838342	11	2718	5	arcC(1)	aroE(4)	glpF(1)	gmk(4)	pta(12)	tpi(1)	yqiL(10)
104-12	0.326247	0.038143	2918663	0	80	80	248388	248388	79818	79818	36483.3	36483.3	0.839372	11	2769	5	arcC(1)	aroE(4)	glpF(1)	gmk(4)	pta(12)	tpi(1)	yqiL(10)
104-13	0.326128	0.0476499	2877503	0	47	47	553797	553797	154942	154942	61223.5	61223.5	0.838617	11	2722	5	arcC(1)	aroE(4)	glpF(1)	gmk(4)	pta(12)	tpi(1)	yqiL(10)
104-14	0.326325	0.0329588	2853886	0	69	69	406646	406646	95566	95566	41360.7	41360.7	0.838992	11	2692	5	arcC(1)	aroE(4)	glpF(1)	gmk(4)	pta(12)	tpi(1)	yqiL(10)
104-15	0.326068	0.044701	2874503	0	50	50	706820	706820	120014	120014	57490.1	57490.1	0.839124	11	2718	5	arcC(1)	aroE(4)	glpF(1)	gmk(4)	pta(12)	tpi(1)	yqiL(10)
104-16	0.326103	0.0381771	2927571	0	49	49	553797	553797	206586	206586	59746.3	59746.3	0.838508	11	2763	5	arcC(1)	aroE(4)	glpF(1)	gmk(4)	pta(12)	tpi(1)	yqiL(10)
104-17	0.326136	0.0394347	2922653	0	67	67	706820	706820	108849	108849	43621.7	43621.7	0.838929	11	2763	5	arcC(1)	aroE(4)	glpF(1)	gmk(4)	pta(12)	tpi(1)	yqiL(10)
104-18	0.326111	0.0391929	2876596	0	51	51	706820	706820	150961	150961	56403.8	56403.8	0.838515	11	2717	5	arcC(1)	aroE(4)	glpF(1)	gmk(4)	pta(12)	tpi(1)	yqiL(10)
104-19	0.326127	0.0372233	2877922	0	53	53	367095	367095	154942	154942	54300.4	54300.4	0.838635	11	2723	5	arcC(1)	aroE(4)	glpF(1)	gmk(4)	pta(12)	tpi(1)	yqiL(10)
104-2	0.326126	0.0393298	2875039	0	51	51	706820	706820	150961	150961	56373.3	56373.3	0.838731	11	2718	5	arcC(1)	aroE(4)	glpF(1)	gmk(4)	pta(12)	tpi(1)	yqiL(10)
104-20	0.326121	0.0373122	2876872	0	51	51	407053	407053	150961	150961	56409.3	56409.3	0.838458	11	2719	5	arcC(1)	aroE(4)	glpF(1)	gmk(4)	pta(12)	tpi(1)	yqiL(10)
104-21	0.326322	0.0442038	2836172	0	55	55	513892	513892	153360	153360	51566.8	51566.8	0.839422	11	2676	5	arcC(1)	aroE(4)	glpF(1)	gmk(4)	pta(12)	tpi(1)	yqiL(10)
104-22	0.326095	0.0455984	2875466	0	52	52	407053	407053	125176	125176	55297.4	55297.4	0.838996	11	2720	5	arcC(1)	aroE(4)	glpF(1)	gmk(4)	pta(12)	tpi(1)	yqiL(10)
104-23	0.326236	0.0411886	2870861	0	76	76	272304	272304	104235	104235	37774.5	37774.5	0.838602	11	2723	5	arcC(1)	aroE(4)	glpF(1)	gmk(4)	pta(12)	tpi(1)	yqiL(10)
104-24	0.326044	0.0366931	2875578	0	51	51	407053	407053	150961	150961	56383.9	56383.9	0.839028	11	2720	5	arcC(1)	aroE(4)	glpF(1)	gmk(4)	pta(12)	tpi(1)	yqiL(10)
104-25	0.326133	0.0521992	2876960	0	52	52	407053	407053	125944	125944	55326.2	55326.2	0.838358	11	2719	5	arcC(1)	aroE(4)	glpF(1)	gmk(4)	pta(12)	tpi(1)	yqiL(10)
104-26	0.326185	0.0362761	2859897	0	47	47	407053	407053	170885	170885	60848.9	60848.9	0.838777	11	2694	5	arcC(1)	aroE(4)	glpF(1)	gmk(4)	pta(12)	tpi(1)	yqiL(10)
104-4	0.326055	0.0464029	2875750	0	48	48	706820	706820	150961	150961	59911.5	59911.5	0.839	11	2720	5	arcC(1)	aroE(4)	glpF(1)	gmk(4)	pta(12)	tpi(1)	yqiL(10)
104-5	0.326104	0.0340859	2866831	0	66	66	356845	356845	135405	135405	43436.8	43436.8	0.838569	11	2710	5	arcC(1)	aroE(4)	glpF(1)	gmk(4)	pta(12)	tpi(1)	yqiL(10)
104-6	0.326085	0.0341362	2872797	0	61	61	356872	356872	134437	134437	47095	47095	0.83884	11	2718	5	arcC(1)	aroE(4)	glpF(1)	gmk(4)	pta(12)	tpi(1)	yqiL(10)
104-7	0.326128	0.0476498	2877732	0	47	47	553797	553797	154942	154942	61228.3	61228.3	0.838627	11	2721	5	arcC(1)	aroE(4)	glpF(1)	gmk(4)	pta(12)	tpi(1)	yqiL(10)
104-8	0.326128	0.0387553	2876707	0	52	52	407053	407053	150961	150961	55321.3	55321.3	0.838549	11	2720	5	arcC(1)	aroE(4)	glpF(1)	gmk(4)	pta(12)	tpi(1)	yqiL(10)
104-9	0.326137	0.0400252	2877852	0	49	49	706820	706820	154942	154942	58731.7	58731.7	0.838752	11	2719	5	arcC(1)	aroE(4)	glpF(1)	gmk(4)	pta(12)	tpi(1)	yqiL(10)
105-3	0.327031	0.0533419	2808487	0	32	32	625070	625070	222168	222168	87765.2	87765.2	0.840821	11	2604	5	arcC(1)	aroE(4)	glpF(1)	gmk(4)	pta(12)	tpi(1)	yqiL(10)
106-0	0.326719	0.0553781	2867177	0	46	46	457719	457719	180154	180154	62329.9	62329.9	0.843074	11	2720	5	arcC(1)	aroE(4)	glpF(1)	gmk(4)	pta(12)	tpi(1)	yqiL(10)
106-1	0.326726	0.0559851	2867947	0	45	45	457719	457719	153358	153358	63732.2	63732.2	0.842971	11	2722	5	arcC(1)	aroE(4)	glpF(1)	gmk(4)	pta(12)	tpi(1)	yqiL(10)
106-10	0.326757	0.0458932	2866106	0	48	48	757698	757698	153358	153358	59710.5	59710.5	0.842964	11	2725	5	arcC(1)	aroE(4)	glpF(1)	gmk(4)	pta(12)	tpi(1)	yqiL(10)
106-11	0.326734	0.0400553	3180794	0	62	62	627630	627630	110043	110043	51303.1	51303.1	0.841762	11	3040	5(1LV)	arcC(692?)	aroE(4)	glpF(1)	gmk(4)	pta(12)	tpi(1)	yqiL(10)
106-12	0.32671	0.0519182	2867484	0	53	53	349930	349930	131943	131943	54103.5	54103.5	0.843194	11	2729	5	arcC(1)	aroE(4)	glpF(1)	gmk(4)	pta(12)	tpi(1)	yqiL(10)
106-13	0.32666	0.0420772	2866954	0	46	46	457719	457719	153358	153358	62325.1	62325.1	0.843306	11	2722	5	arcC(1)	aroE(4)	glpF(1)	gmk(4)	pta(12)	tpi(1)	yqiL(10)
106-14	0.326732	0.0453632	2867680	0	50	50	457950	457950	153358	153358	57353.6	57353.6	0.843214	11	2722	5	arcC(1)	aroE(4)	glpF(1)	gmk(4)	pta(12)	tpi(1)	yqiL(10)
106-15	0.326651	0.0405091	2866710	0	46	46	757634	757634	131943	131943	62319.8	62319.8	0.843372	11	2721	5	arcC(1)	aroE(4)	glpF(1)	gmk(4)	pta(12)	tpi(1)	yqiL(10)
106-16	0.326708	0.0534932	2917787	0	52	52	757698	757698	131943	131943	56111.3	56111.3	0.843014	11	2767	5	arcC(1)	aroE(4)	glpF(1)	gmk(4)	pta(12)	tpi(1)	yqiL(10)
106-17	0.326732	0.0389721	2867135	0	48	48	457950	457950	141910	141910	59732	59732	0.842909	11	2720	5	arcC(1)	aroE(4)	glpF(1)	gmk(4)	pta(12)	tpi(1)	yqiL(10)
106-19	0.326835	0.0429987	2913109	0	79	79	309986	309986	89847	89847	36874.8	36874.8	0.843393	11	2779	5	arcC(1)	aroE(4)	glpF(1)	gmk(4)	pta(12)	tpi(1)	yqiL(10)
106-2	0.326716	0.0417597	2918384	0	61	61	329977	329977	124691	124691	47842.4	47842.4	0.843057	11	2775	5	arcC(1)	aroE(4)	glpF(1)	gmk(4)	pta(12)	tpi(1)	yqiL(10)
106-20	0.326828	0.0356452	2858705	0	63	63	286703	286703	95020	95020	45376.3	45376.3	0.84335	11	2731	5	arcC(1)	aroE(4)	glpF(1)	gmk(4)	pta(12)	tpi(1)	yqiL(10)
106-21	0.326662	0.0414508	2865963	0	48	48	457719	457719	153357	153357	59707.6	59707.6	0.843228	11	2721	5	arcC(1)	aroE(4)	glpF(1)	gmk(4)	pta(12)	tpi(1)	yqiL(10)
106-3	0.326709	0.0416337	2916311	0	59	59	457950	457950	131943	131943	49429	49429	0.843241	11	2770	5	arcC(1)	aroE(4)	glpF(1)	gmk(4)	pta(12)	tpi(1)	yqiL(10)
106-4	0.326356	0.0448959	3090371	0	68	68	333275	333275	105203	105203	45446.6	45446.6	0.84365	11	2962	5(1LV)	arcC(700?)	aroE(4)	glpF(1)	gmk(4)	pta(12)	tpi(1)	yqiL(10)
106-5	0.326742	0.0388662	2867412	0	51	51	457950	457950	153629	153629	56223.8	56223.8	0.843015	11	2719	5	arcC(1)	aroE(4)	glpF(1)	gmk(4)	pta(12)	tpi(1)	yqiL(10)
106-6	0.326721	0.0503919	2867079	0	45	45	457950	457950	180154	180154	63712.9	63712.9	0.84304	11	2720	5	arcC(1)	aroE(4)	glpF(1)	gmk(4)	pta(12)	tpi(1)	yqiL(10)
106-7	0.326544	0.0480362	2824177	0	43	43	435607	435607	153358	153358	65678.5	65678.5	0.842172	11	2655	5	arcC(1)	aroE(4)	glpF(1)	gmk(4)	pta(12)	tpi(1)	yqiL(10)
106-8	0.326722	0.047299	2867157	0	51	51	757698	757698	153358	153358	56218.8	56218.8	0.84296	11	2720	5	arcC(1)	aroE(4)	glpF(1)	gmk(4)	pta(12)	tpi(1)	yqiL(10)
106-9	0.326782	0.0452868	2915403	0	68	68	272641	272641	89846	89846	42873.6	42873.6	0.843625	11	2776	5	arcC(1)	aroE(4)	glpF(1)	gmk(4)	pta(12)	tpi(1)	yqiL(10)
107-0	0.327478	0.0602624	2745043	0	26	26	517868	517868	384594	384594	105579	105579	0.844249	11	2558	3390	arcC(1)	aroE(4)	glpF(1)	gmk(4)	pta(12)	tpi(1)	yqiL(483)
107-1	0.327456	0.0530621	2745056	0	25	25	518379	518379	384594	384594	109802	109802	0.844355	11	2557	3390	arcC(1)	aroE(4)	glpF(1)	gmk(4)	pta(12)	tpi(1)	yqiL(483)
107-2	0.327461	0.0627375	2745295	0	27	27	516797	516797	384594	384594	101678	101678	0.844206	11	2556	3390	arcC(1)	aroE(4)	glpF(1)	gmk(4)	pta(12)	tpi(1)	yqiL(483)
107-3	0.327337	0.0690728	2822575	0	29	29	516286	516286	299777	299777	97330.2	97330.2	0.843929	11	2630	5	arcC(1)	aroE(4)	glpF(1)	gmk(4)	pta(12)	tpi(1)	yqiL(483)
107-4	0.327543	0.0599978	2746085	0	29	29	518379	518379	299777	299777	94692.6	94692.6	0.844015	11	2559	3390	arcC(1)	aroE(4)	glpF(1)	gmk(4)	pta(12)	tpi(1)	yqiL(483)
111-1	0.328085	0.0530551	2739346	0	29	29	809740	809740	268473	268473	94460.2	94460.2	0.846366	11	2563	45	arcC(10)	aroE(14)	glpF(8)	gmk(6)	pta(10)	tpi(3)	yqiL(2)
111-1.2	0.328004	0.0541714	2737736	0	26	26	427376	427376	268542	268542	105298	105298	0.847058	11	2566	45	arcC(10)	aroE(14)	glpF(8)	gmk(6)	pta(10)	tpi(3)	yqiL(2)
114-9	0.326359	0.0630808	2742004	0	29	29	599924	599924	194051	194051	94551.9	94551.9	0.839873	11	2522	8	arcC(3)	aroE(3)	glpF(1)	gmk(1)	pta(4)	tpi(4)	yqiL(3)
119-0	0.327476	0.0432927	2711742	0	34	34	359137	359137	127934	127934	79757.1	79757.1	0.841282	11	2505	59	arcC(19)	aroE(23)	glpF(15)	gmk(2)	pta(19)	tpi(20)	yqiL(15)
119-0.2	0.327486	0.050615	2711626	0	36	36	359137	359137	127933	127933	75322.9	75322.9	0.841334	11	2505	59	arcC(19)	aroE(23)	glpF(15)	gmk(2)	pta(19)	tpi(20)	yqiL(15)
119-10	0.327089	0.0392064	2782610	0	47	47	303911	303911	120434	120434	59204.5	59204.5	0.84062	11	2633	30	arcC(2)	aroE(2)	glpF(2)	gmk(2)	pta(6)	tpi(3)	yqiL(2)
119-10.2	0.327044	0.040437	2789123	0	54	54	302057	302057	118531	118531	51650.4	51650.4	0.840313	11	2647	30	arcC(2)	aroE(2)	glpF(2)	gmk(2)	pta(6)	tpi(3)	yqiL(2)
119-11	0.327081	0.0397487	2781481	0	51	51	302057	302057	120203	120203	54538.8	54538.8	0.840669	11	2633	30	arcC(2)	aroE(2)	glpF(2)	gmk(2)	pta(6)	tpi(3)	yqiL(2)
119-11.2	0.326991	0.0395722	2788722	0	54	54	302057	302057	120203	120203	51643	51643	0.84058	11	2648	30	arcC(2)	aroE(2)	glpF(2)	gmk(2)	pta(6)	tpi(3)	yqiL(2)
119-6	0.327072	0.0399544	2789904	0	53	53	302057	302057	120203	120203	52639.7	52639.7	0.840247	11	2647	30	arcC(2)	aroE(2)	glpF(2)	gmk(2)	pta(6)	tpi(3)	yqiL(2)
119-7.1	0.326985	0.0403213	2788684	0	53	53	302057	302057	120203	120203	52616.7	52616.7	0.84061	11	2647	30	arcC(2)	aroE(2)	glpF(2)	gmk(2)	pta(6)	tpi(3)	yqiL(2)
119-7.2	0.327046	0.03983	2789650	0	56	56	302057	302057	120203	120203	49815.2	49815.2	0.840237	11	2649	30	arcC(2)	aroE(2)	glpF(2)	gmk(2)	pta(6)	tpi(3)	yqiL(2)
119-7.3	0.32699	0.0404641	2788614	0	54	54	302057	302057	118531	118531	51641	51641	0.84069	11	2648	30	arcC(2)	aroE(2)	glpF(2)	gmk(2)	pta(6)	tpi(3)	yqiL(2)
119-7.4	0.327047	0.0400668	2789703	0	55	55	302057	302057	120203	120203	50721.9	50721.9	0.840279	11	2645	30	arcC(2)	aroE(2)	glpF(2)	gmk(2)	pta(6)	tpi(3)	yqiL(2)
119-7.5	0.327054	0.0404869	2789794	0	54	54	302057	302057	120203	120203	51662.9	51662.9	0.840325	11	2646	30	arcC(2)	aroE(2)	glpF(2)	gmk(2)	pta(6)	tpi(3)	yqiL(2)
119-7.6	0.326993	0.0409198	2788851	0	53	53	302057	302057	120203	120203	52619.8	52619.8	0.840609	11	2646	30	arcC(2)	aroE(2)	glpF(2)	gmk(2)	pta(6)	tpi(3)	yqiL(2)
119-7.7	0.327057	0.0396455	2789013	0	55	55	198589	198589	120203	120203	50709.3	50709.3	0.840528	11	2647	30	arcC(2)	aroE(2)	glpF(2)	gmk(2)	pta(6)	tpi(3)	yqiL(2)
119-7.8	0.327037	0.0415884	2754166	0	44	44	365861	365861	126152	126152	62594.7	62594.7	0.840169	11	2582	30	arcC(2)	aroE(2)	glpF(2)	gmk(2)	pta(6)	tpi(3)	yqiL(2)
119-7.9	0.32705	0.0405101	2789466	0	53	53	302057	302057	120203	120203	52631.4	52631.4	0.8403	11	2645	30	arcC(2)	aroE(2)	glpF(2)	gmk(2)	pta(6)	tpi(3)	yqiL(2)
119-8.1	0.326983	0.0406426	2788697	0	54	54	302057	302057	120203	120203	51642.5	51642.5	0.840673	11	2645	30	arcC(2)	aroE(2)	glpF(2)	gmk(2)	pta(6)	tpi(3)	yqiL(2)
119-8.2	0.327038	0.0400666	2776781	0	53	53	302057	302057	114858	114858	52392.1	52392.1	0.840526	11	2634	30	arcC(2)	aroE(2)	glpF(2)	gmk(2)	pta(6)	tpi(3)	yqiL(2)
119-8.3	0.327038	0.040266	2789345	0	54	54	302057	302057	120203	120203	51654.5	51654.5	0.840374	11	2647	30	arcC(2)	aroE(2)	glpF(2)	gmk(2)	pta(6)	tpi(3)	yqiL(2)
119-8.4	0.327064	0.0399319	2789243	0	51	51	302057	302057	120203	120203	54691	54691	0.840493	11	2645	30	arcC(2)	aroE(2)	glpF(2)	gmk(2)	pta(6)	tpi(3)	yqiL(2)
119-9	0.327045	0.0395334	2789507	0	55	55	302057	302057	120203	120203	50718.3	50718.3	0.840304	11	2647	30	arcC(2)	aroE(2)	glpF(2)	gmk(2)	pta(6)	tpi(3)	yqiL(2)
129-0	0.326864	0.0630645	2770509	0	30	30	466485	466485	237679	237679	92350.3	92350.3	0.840958	11	2571	1866	arcC(1)	aroE(4)	glpF(1)	gmk(4)	pta(79)	tpi(1)	yqiL(10)
129-1	0.32686	0.0620116	2763620	0	31	31	466716	466716	237679	237679	89149	89149	0.840988	11	2567	1866	arcC(1)	aroE(4)	glpF(1)	gmk(4)	pta(79)	tpi(1)	yqiL(10)
201-0	0.327096	0.041477	2860408	0	39	39	359088	359088	159054	159054	73343.8	73343.8	0.842023	11	2695	5	arcC(1)	aroE(4)	glpF(1)	gmk(4)	pta(12)	tpi(1)	yqiL(10)
201-1	0.327176	0.0507934	2861189	0	34	34	623596	623596	199764	199764	84152.6	84152.6	0.841547	11	2695	5	arcC(1)	aroE(4)	glpF(1)	gmk(4)	pta(12)	tpi(1)	yqiL(10)
201-11	0.327177	0.0523214	2862072	0	34	34	625253	625253	199764	199764	84178.6	84178.6	0.841849	11	2698	5	arcC(1)	aroE(4)	glpF(1)	gmk(4)	pta(12)	tpi(1)	yqiL(10)
201-12	0.327194	0.0332221	2862317	0	31	31	418894	418894	187025	187025	92332.8	92332.8	0.841556	11	2687	5	arcC(1)	aroE(4)	glpF(1)	gmk(4)	pta(12)	tpi(1)	yqiL(10)
201-12.2	0.327682	0.0412446	2788649	0	35	35	500803	500803	177181	177181	79675.7	79675.7	0.843846	11	2618	5	arcC(1)	aroE(4)	glpF(1)	gmk(4)	pta(12)	tpi(1)	yqiL(10)
201-14	0.32719	0.0324959	2861904	0	32	32	331257	331257	187025	187025	89434.5	89434.5	0.841615	11	2689	5	arcC(1)	aroE(4)	glpF(1)	gmk(4)	pta(12)	tpi(1)	yqiL(10)
201-14.2	0.32773	0.0396961	2789303	0	35	35	677877	677877	219347	219347	79694.4	79694.4	0.843833	11	2622	5	arcC(1)	aroE(4)	glpF(1)	gmk(4)	pta(12)	tpi(1)	yqiL(10)
201-15	0.327745	0.0408281	2789185	0	33	33	564221	564221	187025	187025	84520.8	84520.8	0.843791	11	2623	5	arcC(1)	aroE(4)	glpF(1)	gmk(4)	pta(12)	tpi(1)	yqiL(10)
201-17	0.327698	0.046274	2789017	0	38	38	331302	331302	187027	187027	73395.2	73395.2	0.844408	11	2624	5	arcC(1)	aroE(4)	glpF(1)	gmk(4)	pta(12)	tpi(1)	yqiL(10)
201-2	0.327103	0.0454904	2859728	0	33	33	474124	474124	159056	159056	86658.4	86658.4	0.841788	11	2693	5	arcC(1)	aroE(4)	glpF(1)	gmk(4)	pta(12)	tpi(1)	yqiL(10)
201-3	0.327099	0.0160974	2860842	0	33	33	475619	475619	151217	151217	86692.2	86692.2	0.841786	11	2689	5	arcC(1)	aroE(4)	glpF(1)	gmk(4)	pta(12)	tpi(1)	yqiL(10)
201-4	0.327105	0.0315827	2860694	0	39	39	331257	331257	151217	151217	73351.1	73351.1	0.841959	11	2693	5	arcC(1)	aroE(4)	glpF(1)	gmk(4)	pta(12)	tpi(1)	yqiL(10)
201-6	0.327681	0.0289123	2789225	0	34	34	332926	332926	159054	159054	82036	82036	0.844541	11	2624	5	arcC(1)	aroE(4)	glpF(1)	gmk(4)	pta(12)	tpi(1)	yqiL(10)
201-7	0.32722	0.0515811	2862218	0	36	36	418967	418967	199764	199764	79506.1	79506.1	0.841305	11	2698	5	arcC(1)	aroE(4)	glpF(1)	gmk(4)	pta(12)	tpi(1)	yqiL(10)
201-9	0.327113	0.0457059	2861009	0	33	33	474177	474177	199763	199763	86697.2	86697.2	0.841949	11	2702	5	arcC(1)	aroE(4)	glpF(1)	gmk(4)	pta(12)	tpi(1)	yqiL(10)
201-9.2	0.32679	0.0392166	2817448	0	36	36	220192	220192	148468	148468	78262.4	78262.4	0.840323	11	2626	5	arcC(1)	aroE(4)	glpF(1)	gmk(4)	pta(12)	tpi(1)	yqiL(10)
203-10	0.326573	0.0511849	2848026	0	33	33	369192	369192	220192	220192	86303.8	86303.8	0.839372	11	2652	5	arcC(1)	aroE(4)	glpF(1)	gmk(4)	pta(12)	tpi(1)	yqiL(10)
203-12	0.327016	0.0579024	2824730	0	41	41	331379	331379	167446	167446	68895.9	68895.9	0.841531	11	2637	5	arcC(1)	aroE(4)	glpF(1)	gmk(4)	pta(12)	tpi(1)	yqiL(10)
203-13	0.326538	0.0525785	2898711	0	57	57	418962	418962	169000	169000	50854.6	50854.6	0.839755	11	2716	5	arcC(1)	aroE(4)	glpF(1)	gmk(4)	pta(12)	tpi(1)	yqiL(10)
203-14	0.326479	0.0486608	2847079	0	48	48	331372	331372	167447	167447	59314.1	59314.1	0.839637	11	2663	5	arcC(1)	aroE(4)	glpF(1)	gmk(4)	pta(12)	tpi(1)	yqiL(10)
203-15	0.326574	0.0570851	2846584	0	33	33	625305	625305	243813	243813	86260.1	86260.1	0.83956	11	2651	5	arcC(1)	aroE(4)	glpF(1)	gmk(4)	pta(12)	tpi(1)	yqiL(10)
203-16	0.326573	0.0475989	2848639	0	57	57	418962	418962	168999	168999	49976.1	49976.1	0.839461	11	2671	5	arcC(1)	aroE(4)	glpF(1)	gmk(4)	pta(12)	tpi(1)	yqiL(10)
203-17	0.327007	0.0619447	2824118	0	33	33	369158	369158	220192	220192	85579.3	85579.3	0.841599	11	2630	5	arcC(1)	aroE(4)	glpF(1)	gmk(4)	pta(12)	tpi(1)	yqiL(10)
203-18	0.327039	0.0498753	2825269	0	43	43	418890	418890	169257	169257	65703.9	65703.9	0.841484	11	2638	5	arcC(1)	aroE(4)	glpF(1)	gmk(4)	pta(12)	tpi(1)	yqiL(10)
203-19	0.3268	0.0659258	2827464	0	29	29	474389	474389	243813	243813	97498.8	97498.8	0.840381	11	2630	5	arcC(1)	aroE(4)	glpF(1)	gmk(4)	pta(12)	tpi(1)	yqiL(10)
203-20	0.326576	0.0560653	2847777	0	32	32	418962	418962	220192	220192	88993	88993	0.83942	11	2650	5	arcC(1)	aroE(4)	glpF(1)	gmk(4)	pta(12)	tpi(1)	yqiL(10)
203-9	0.326999	0.0593323	2824840	0	27	27	418890	418890	222197	222197	104624	104624	0.841499	11	2628	5	arcC(1)	aroE(4)	glpF(1)	gmk(4)	pta(12)	tpi(1)	yqiL(10)
204-15	0.326788	0.0406065	2798432	0	48	48	465600	465600	141632	141632	58300.7	58300.7	0.839424	11	2604	5	arcC(1)	aroE(4)	glpF(1)	gmk(4)	pta(12)	tpi(1)	yqiL(10)
207-0	0.327654	0.0562861	2726747	0	34	34	438243	438243	301683	301683	80198.4	80198.4	0.845001	11	2569	45	arcC(10)	aroE(14)	glpF(8)	gmk(6)	pta(10)	tpi(3)	yqiL(2)
207-1	0.327657	0.0594223	2727129	0	30	30	442167	442167	382485	382485	90904.3	90904.3	0.844986	11	2565	45	arcC(10)	aroE(14)	glpF(8)	gmk(6)	pta(10)	tpi(3)	yqiL(2)
207-10	0.327699	0.0586534	2723109	0	32	32	438245	438245	301682	301682	85097.2	85097.2	0.845057	11	2565	45	arcC(10)	aroE(14)	glpF(8)	gmk(6)	pta(10)	tpi(3)	yqiL(2)
207-11	0.327654	0.0592972	2722900	0	30	30	684107	684107	428108	428108	90763.3	90763.3	0.845192	11	2565	45	arcC(10)	aroE(14)	glpF(8)	gmk(6)	pta(10)	tpi(3)	yqiL(2)
207-12	0.327665	0.0582864	2727754	0	32	32	442167	442167	382485	382485	85242.3	85242.3	0.844702	11	2565	45	arcC(10)	aroE(14)	glpF(8)	gmk(6)	pta(10)	tpi(3)	yqiL(2)
207-14	0.327682	0.0573052	2726983	0	32	32	438469	438469	382485	382485	85218.2	85218.2	0.844871	11	2567	45	arcC(10)	aroE(14)	glpF(8)	gmk(6)	pta(10)	tpi(3)	yqiL(2)
207-16	0.327646	0.0562853	2726508	0	34	34	438243	438243	301683	301683	80191.4	80191.4	0.844907	11	2566	45	arcC(10)	aroE(14)	glpF(8)	gmk(6)	pta(10)	tpi(3)	yqiL(2)
207-17	0.327696	0.060586	2728339	0	32	32	442167	442167	382484	382484	85260.6	85260.6	0.844737	11	2568	45	arcC(10)	aroE(14)	glpF(8)	gmk(6)	pta(10)	tpi(3)	yqiL(2)
207-2	0.327656	0.0355189	2729985	0	65	65	270968	270968	107496	107496	41999.8	41999.8	0.844696	11	2590	45	arcC(10)	aroE(14)	glpF(8)	gmk(6)	pta(10)	tpi(3)	yqiL(2)
207-3	0.327632	0.056884	2726743	0	33	33	684109	684109	428108	428108	82628.6	82628.6	0.844907	11	2568	45	arcC(10)	aroE(14)	glpF(8)	gmk(6)	pta(10)	tpi(3)	yqiL(2)
207-4	0.327574	0.0460401	2726959	0	49	49	325198	325198	124621	124621	55652.2	55652.2	0.844961	11	2575	45	arcC(10)	aroE(14)	glpF(8)	gmk(6)	pta(10)	tpi(3)	yqiL(2)
207-5	0.327686	0.0553312	2728175	0	38	38	438243	438243	301684	301684	71794.1	71794.1	0.844514	11	2571	45	arcC(10)	aroE(14)	glpF(8)	gmk(6)	pta(10)	tpi(3)	yqiL(2)
207-6	0.327701	0.0585001	2727964	0	34	34	684108	684108	428108	428108	80234.2	80234.2	0.844522	11	2567	45	arcC(10)	aroE(14)	glpF(8)	gmk(6)	pta(10)	tpi(3)	yqiL(2)
207-7	0.327656	0.0570267	2727425	0	33	33	442167	442167	310943	310943	82649.2	82649.2	0.845038	11	2567	45	arcC(10)	aroE(14)	glpF(8)	gmk(6)	pta(10)	tpi(3)	yqiL(2)
207-8	0.32771	0.058103	2723602	0	32	32	438243	438243	301682	301682	85112.6	85112.6	0.845023	11	2566	45	arcC(10)	aroE(14)	glpF(8)	gmk(6)	pta(10)	tpi(3)	yqiL(2)
207-9	0.327689	0.0595829	2727820	0	33	33	684108	684108	428108	428108	82661.2	82661.2	0.8445	11	2566	45	arcC(10)	aroE(14)	glpF(8)	gmk(6)	pta(10)	tpi(3)	yqiL(2)
210-0	0.327079	0.0504286	2819873	0	52	52	466479	466479	153611	153611	54228.3	54228.3	0.840177	11	2648	5	arcC(1)	aroE(4)	glpF(1)	gmk(4)	pta(12)	tpi(1)	yqiL(10)
210-6	0.3265	0.0485309	2855375	0	60	60	466479	466479	134612	134612	47589.6	47589.6	0.840871	11	2682	5	arcC(1)	aroE(4)	glpF(1)	gmk(4)	pta(12)	tpi(1)	yqiL(10)
57-0	0.327213	0.0438068	2870082	0	39	39	545765	545765	169689	169689	73591.8	73591.8	0.842397	11	2710	5	arcC(1)	aroE(4)	glpF(1)	gmk(4)	pta(12)	tpi(1)	yqiL(10)
86-0	0.326881	0.0597786	2782719	0	22	22	536041	536041	285778	285778	126487	126487	0.842219	11	2598	8	arcC(3)	aroE(3)	glpF(1)	gmk(1)	pta(4)	tpi(4)	yqiL(3)
86-10	0.326904	0.0597237	2781569	0	22	22	536143	536143	299239	299239	126435	126435	0.842258	11	2599	8	arcC(3)	aroE(3)	glpF(1)	gmk(1)	pta(4)	tpi(4)	yqiL(3)
86-10.2	0.32696	0.0611231	2781497	0	25	25	536145	536145	299121	299121	111260	111260	0.841936	11	2595	8	arcC(3)	aroE(3)	glpF(1)	gmk(1)	pta(4)	tpi(4)	yqiL(3)
86-2	0.326894	0.0665278	2782857	0	25	25	536149	536149	285831	285831	111314	111314	0.842044	11	2598	8	arcC(3)	aroE(3)	glpF(1)	gmk(1)	pta(4)	tpi(4)	yqiL(3)
86-7	0.326938	0.0610266	2784119	0	25	25	536150	536150	285831	285831	111365	111365	0.841879	11	2600	8	arcC(3)	aroE(3)	glpF(1)	gmk(1)	pta(4)	tpi(4)	yqiL(3)
86-7U	0.326875	0.0652905	2782297	0	25	25	536150	536150	285831	285831	111292	111292	0.842179	11	2598	8	arcC(3)	aroE(3)	glpF(1)	gmk(1)	pta(4)	tpi(4)	yqiL(3)
95-0	0.32721	0.0425752	2759580	0	39	39	315233	315233	170742	170742	70758.5	70758.5	0.840878	11	2572	15	arcC(13)	aroE(13)	glpF(1)	gmk(1)	pta(12)	tpi(11)	yqiL(13)
97-2	0.32736	0.0567422	2818586	0	45	45	315033	315033	220128	220128	62635.2	62635.2	0.842881	11	2644	5	arcC(1)	aroE(4)	glpF(1)	gmk(4)	pta(12)	tpi(1)	yqiL(10)
MRSA-1369	0.326062	0.0545647	2857682	0	32	32	881263	881263	283815	283815	89302.6	89302.6	0.840123	11	2673	8	arcC(3)	aroE(3)	glpF(1)	gmk(1)	pta(4)	tpi(4)	yqiL(3)

## Sheet: Table S3
Isolate_ID	Report	Complete_BUSCOs_(C)	Complete_and_single-copy_BUSCOs_(S)	Complete_and_duplicated_BUSCOs_(D)	Fragmented_BUSCOs_(F)	Missing_BUSCOs_(M)	Total_BUSCO_groups_searched	Number_of_scaffolds	Number_of_contigs	Total_length	Percent_gaps	Scaffold_N50_(KB)	Contigs_N50_(KB)	Dependencies_and_versions	Isolate_ID	GC	GC_std	Genome_size
100-0	C:100.0%[S:100.0%,D:0.0%],F:0.0%,M:0.0%,n:450	450	450	0	0	0	450	34	34	2729107	0	280	280	hmmsearch: 3.1, bbtools: 39.06, prodigal: 2.6.3, busco: 5.6.1	100-0	0.326722	0.0607505	2729107	YES
100-1	C:100.0%[S:100.0%,D:0.0%],F:0.0%,M:0.0%,n:450	450	450	0	0	0	450	38	38	2771877	0	281	281	hmmsearch: 3.1, bbtools: 39.06, prodigal: 2.6.3, busco: 5.6.1	100-1	0.326944	0.0524915	2771877	YES
101-0	C:100.0%[S:100.0%,D:0.0%],F:0.0%,M:0.0%,n:450	450	450	0	0	0	450	26	26	2780716	0	399	399	hmmsearch: 3.1, bbtools: 39.06, prodigal: 2.6.3, busco: 5.6.1	101-0	0.32763	0.0616992	2780716	YES
101-1	C:100.0%[S:100.0%,D:0.0%],F:0.0%,M:0.0%,n:450	450	450	0	0	0	450	31	31	2781982	0	363	363	hmmsearch: 3.1, bbtools: 39.06, prodigal: 2.6.3, busco: 5.6.1	101-1	0.327658	0.0465496	2781982	YES
101-19	C:100.0%[S:100.0%,D:0.0%],F:0.0%,M:0.0%,n:450	450	450	0	0	0	450	32	32	2727331	0	301	301	hmmsearch: 3.1, bbtools: 39.06, prodigal: 2.6.3, busco: 5.6.1	101-19	0.327657	0.0496715	2727331	YES
101-2	C:100.0%[S:100.0%,D:0.0%],F:0.0%,M:0.0%,n:450	450	450	0	0	0	450	32	32	2780790	0	450	450	hmmsearch: 3.1, bbtools: 39.06, prodigal: 2.6.3, busco: 5.6.1	101-2	0.32756	0.0470306	2780790	YES
101-3	C:100.0%[S:100.0%,D:0.0%],F:0.0%,M:0.0%,n:450	450	450	0	0	0	450	32	32	2781239	0	360	360	hmmsearch: 3.1, bbtools: 39.06, prodigal: 2.6.3, busco: 5.6.1	101-3	0.327646	0.0453718	2781239	YES
101-4	C:100.0%[S:100.0%,D:0.0%],F:0.0%,M:0.0%,n:450	450	450	0	0	0	450	44	44	2778850	0	206	206	hmmsearch: 3.1, bbtools: 39.06, prodigal: 2.6.3, busco: 5.6.1	101-4	0.327651	0.047549	2778850	YES
101-5	C:100.0%[S:100.0%,D:0.0%],F:0.0%,M:0.0%,n:450	450	450	0	0	0	450	32	32	2780249	0	348	348	hmmsearch: 3.1, bbtools: 39.06, prodigal: 2.6.3, busco: 5.6.1	101-5	0.327592	0.0479459	2780249	YES
101-6	C:99.8%[S:99.8%,D:0.0%],F:0.2%,M:0.0%,n:450	449	449	0	1	0	450	40	40	2758926	0	206	206	hmmsearch: 3.1, bbtools: 39.06, prodigal: 2.6.3, busco: 5.6.1	101-6	0.32794	0.0294641	2758926	YES
101-7	C:99.8%[S:99.6%,D:0.2%],F:0.2%,M:0.0%,n:450	449	448	1	1	0	450	78	78	2809986	0	66	66	hmmsearch: 3.1, bbtools: 39.06, prodigal: 2.6.3, busco: 5.6.1	101-7	0.327513	0.0230478	2809986	YES
101-8	C:100.0%[S:100.0%,D:0.0%],F:0.0%,M:0.0%,n:450	450	450	0	0	0	450	58	58	2802989	0	108	108	hmmsearch: 3.1, bbtools: 39.06, prodigal: 2.6.3, busco: 5.6.1	101-8	0.327317	0.0257445	2802989	YES
102-0	C:100.0%[S:100.0%,D:0.0%],F:0.0%,M:0.0%,n:450	450	450	0	0	0	450	28	28	2744549	0	220	220	hmmsearch: 3.1, bbtools: 39.06, prodigal: 2.6.3, busco: 5.6.1	102-0	0.327705	0.0463861	2744549	YES
102-1	C:100.0%[S:100.0%,D:0.0%],F:0.0%,M:0.0%,n:450	450	450	0	0	0	450	41	41	2722637	0	156	156	hmmsearch: 3.1, bbtools: 39.06, prodigal: 2.6.3, busco: 5.6.1	102-1	0.328004	0.048468	2722637	YES
102-10	C:100.0%[S:100.0%,D:0.0%],F:0.0%,M:0.0%,n:450	450	450	0	0	0	450	31	31	2702417	0	204	204	hmmsearch: 3.1, bbtools: 39.06, prodigal: 2.6.3, busco: 5.6.1	102-10	0.327364	0.0550186	2702417	YES
102-11	C:99.7%[S:79.3%,D:20.4%],F:0.0%,M:0.3%,n:450	449	357	92	0	1	450	62	62	3012113	0	104	104	hmmsearch: 3.1, bbtools: 39.06, prodigal: 2.6.3, busco: 5.6.1	102-11	0.327357	0.0242784	3012113	YES
102-12	C:100.0%[S:100.0%,D:0.0%],F:0.0%,M:0.0%,n:450	450	450	0	0	0	450	31	31	2743263	0	171	171	hmmsearch: 3.1, bbtools: 39.06, prodigal: 2.6.3, busco: 5.6.1	102-12	0.327641	0.0331951	2743263	YES
102-13	C:99.8%[S:96.7%,D:3.1%],F:0.2%,M:0.0%,n:450	449	435	14	1	0	450	66	66	2892725	0	60	60	hmmsearch: 3.1, bbtools: 39.06, prodigal: 2.6.3, busco: 5.6.1	102-13	0.327845	0.0362169	2892725	YES
102-14	C:100.0%[S:100.0%,D:0.0%],F:0.0%,M:0.0%,n:450	450	450	0	0	0	450	29	29	2744618	0	206	206	hmmsearch: 3.1, bbtools: 39.06, prodigal: 2.6.3, busco: 5.6.1	102-14	0.327683	0.0454901	2744618	YES
102-15	C:100.0%[S:100.0%,D:0.0%],F:0.0%,M:0.0%,n:450	450	450	0	0	0	450	38	38	2741886	0	170	170	hmmsearch: 3.1, bbtools: 39.06, prodigal: 2.6.3, busco: 5.6.1	102-15	0.327723	0.0514757	2741886	YES
102-16	C:100.0%[S:100.0%,D:0.0%],F:0.0%,M:0.0%,n:450	450	450	0	0	0	450	33	33	2784359	0	220	220	hmmsearch: 3.1, bbtools: 39.06, prodigal: 2.6.3, busco: 5.6.1	102-16	0.327738	0.0529366	2784359	YES
102-17	C:100.0%[S:100.0%,D:0.0%],F:0.0%,M:0.0%,n:450	450	450	0	0	0	450	36	36	2785235	0	220	220	hmmsearch: 3.1, bbtools: 39.06, prodigal: 2.6.3, busco: 5.6.1	102-17	0.327743	0.0507002	2785235	YES
102-18	C:100.0%[S:100.0%,D:0.0%],F:0.0%,M:0.0%,n:450	450	450	0	0	0	450	29	29	2744054	0	220	220	hmmsearch: 3.1, bbtools: 39.06, prodigal: 2.6.3, busco: 5.6.1	102-18	0.327622	0.0471616	2744054	YES
102-19	C:100.0%[S:100.0%,D:0.0%],F:0.0%,M:0.0%,n:450	450	450	0	0	0	450	42	42	2781575	0	199	199	hmmsearch: 3.1, bbtools: 39.06, prodigal: 2.6.3, busco: 5.6.1	102-19	0.327727	0.0408857	2781575	YES
102-20	C:100.0%[S:100.0%,D:0.0%],F:0.0%,M:0.0%,n:450	450	450	0	0	0	450	29	29	2743735	0	220	220	hmmsearch: 3.1, bbtools: 39.06, prodigal: 2.6.3, busco: 5.6.1	102-20	0.327627	0.0575177	2743735	YES
102-21	C:100.0%[S:100.0%,D:0.0%],F:0.0%,M:0.0%,n:450	450	450	0	0	0	450	41	41	2783093	0	220	220	hmmsearch: 3.1, bbtools: 39.06, prodigal: 2.6.3, busco: 5.6.1	102-21	0.327671	0.0309774	2783093	YES
102-22	C:100.0%[S:100.0%,D:0.0%],F:0.0%,M:0.0%,n:450	450	450	0	0	0	450	45	45	2743793	0	155	155	hmmsearch: 3.1, bbtools: 39.06, prodigal: 2.6.3, busco: 5.6.1	102-22	0.327601	0.029381	2743793	YES
102-23	C:100.0%[S:100.0%,D:0.0%],F:0.0%,M:0.0%,n:450	450	450	0	0	0	450	35	35	2744883	0	165	165	hmmsearch: 3.1, bbtools: 39.06, prodigal: 2.6.3, busco: 5.6.1	102-23	0.327696	0.0418347	2744883	YES
102-24	C:100.0%[S:100.0%,D:0.0%],F:0.0%,M:0.0%,n:450	450	450	0	0	0	450	29	29	2741401	0	220	220	hmmsearch: 3.1, bbtools: 39.06, prodigal: 2.6.3, busco: 5.6.1	102-24	0.327688	0.0564191	2741401	YES
102-25	C:100.0%[S:100.0%,D:0.0%],F:0.0%,M:0.0%,n:450	450	450	0	0	0	450	69	69	2853320	0	88	88	hmmsearch: 3.1, bbtools: 39.06, prodigal: 2.6.3, busco: 5.6.1	102-25	0.327755	0.0388807	2853320	YES
102-26	C:100.0%[S:100.0%,D:0.0%],F:0.0%,M:0.0%,n:450	450	450	0	0	0	450	26	26	2744408	0	220	220	hmmsearch: 3.1, bbtools: 39.06, prodigal: 2.6.3, busco: 5.6.1	102-26	0.327699	0.0490426	2744408	YES
102-4	C:99.6%[S:99.6%,D:0.0%],F:0.0%,M:0.4%,n:450	448	448	0	0	2	450	27	27	2737629	0	220	220	hmmsearch: 3.1, bbtools: 39.06, prodigal: 2.6.3, busco: 5.6.1	102-4	0.327664	0.0493506	2737629	YES
102-5	C:100.0%[S:100.0%,D:0.0%],F:0.0%,M:0.0%,n:450	450	450	0	0	0	450	67	67	2750901	0	81	81	hmmsearch: 3.1, bbtools: 39.06, prodigal: 2.6.3, busco: 5.6.1	102-5	0.327572	0.0330576	2750901	YES
102-6	C:100.0%[S:100.0%,D:0.0%],F:0.0%,M:0.0%,n:450	450	450	0	0	0	450	46	46	2742346	0	104	104	hmmsearch: 3.1, bbtools: 39.06, prodigal: 2.6.3, busco: 5.6.1	102-6	0.327657	0.029539	2742346	YES
102-7	C:100.0%[S:100.0%,D:0.0%],F:0.0%,M:0.0%,n:450	450	450	0	0	0	450	27	27	2744619	0	220	220	hmmsearch: 3.1, bbtools: 39.06, prodigal: 2.6.3, busco: 5.6.1	102-7	0.327698	0.047279	2744619	YES
102-8	C:100.0%[S:100.0%,D:0.0%],F:0.0%,M:0.0%,n:450	450	450	0	0	0	450	56	56	2743088	0	96	96	hmmsearch: 3.1, bbtools: 39.06, prodigal: 2.6.3, busco: 5.6.1	102-8	0.327649	0.0354581	2743088	YES
102-9	C:100.0%[S:100.0%,D:0.0%],F:0.0%,M:0.0%,n:450	450	450	0	0	0	450	35	35	2743503	0	199	199	hmmsearch: 3.1, bbtools: 39.06, prodigal: 2.6.3, busco: 5.6.1	102-9	0.327705	0.0420968	2743503	YES
104-0	C:100.0%[S:100.0%,D:0.0%],F:0.0%,M:0.0%,n:450	450	450	0	0	0	450	51	51	2876663	0	150	150	hmmsearch: 3.1, bbtools: 39.06, prodigal: 2.6.3, busco: 5.6.1	104-0	0.326108	0.0373054	2876663	YES
104-1	C:100.0%[S:100.0%,D:0.0%],F:0.0%,M:0.0%,n:450	450	450	0	0	0	450	52	52	2876730	0	154	154	hmmsearch: 3.1, bbtools: 39.06, prodigal: 2.6.3, busco: 5.6.1	104-1	0.326123	0.045815	2876730	YES
104-10	C:100.0%[S:100.0%,D:0.0%],F:0.0%,M:0.0%,n:450	450	450	0	0	0	450	48	48	2877493	0	154	154	hmmsearch: 3.1, bbtools: 39.06, prodigal: 2.6.3, busco: 5.6.1	104-10	0.326118	0.0386226	2877493	YES
104-11	C:100.0%[S:100.0%,D:0.0%],F:0.0%,M:0.0%,n:450	450	450	0	0	0	450	48	48	2877071	0	154	154	hmmsearch: 3.1, bbtools: 39.06, prodigal: 2.6.3, busco: 5.6.1	104-11	0.326124	0.0386389	2877071	YES
104-12	C:100.0%[S:99.3%,D:0.7%],F:0.0%,M:0.0%,n:450	450	447	3	0	0	450	80	80	2918663	0	79	79	hmmsearch: 3.1, bbtools: 39.06, prodigal: 2.6.3, busco: 5.6.1	104-12	0.326247	0.038143	2918663	YES
104-13	C:100.0%[S:100.0%,D:0.0%],F:0.0%,M:0.0%,n:450	450	450	0	0	0	450	47	47	2877503	0	154	154	hmmsearch: 3.1, bbtools: 39.06, prodigal: 2.6.3, busco: 5.6.1	104-13	0.326128	0.0476499	2877503	YES
104-14	C:100.0%[S:100.0%,D:0.0%],F:0.0%,M:0.0%,n:450	450	450	0	0	0	450	69	69	2853886	0	95	95	hmmsearch: 3.1, bbtools: 39.06, prodigal: 2.6.3, busco: 5.6.1	104-14	0.326325	0.0329588	2853886	YES
104-15	C:100.0%[S:100.0%,D:0.0%],F:0.0%,M:0.0%,n:450	450	450	0	0	0	450	50	50	2874503	0	120	120	hmmsearch: 3.1, bbtools: 39.06, prodigal: 2.6.3, busco: 5.6.1	104-15	0.326068	0.044701	2874503	YES
104-16	C:100.0%[S:99.3%,D:0.7%],F:0.0%,M:0.0%,n:450	450	447	3	0	0	450	49	49	2927571	0	206	206	hmmsearch: 3.1, bbtools: 39.06, prodigal: 2.6.3, busco: 5.6.1	104-16	0.326103	0.0381771	2927571	YES
104-17	C:100.0%[S:99.3%,D:0.7%],F:0.0%,M:0.0%,n:450	450	447	3	0	0	450	67	67	2922653	0	108	108	hmmsearch: 3.1, bbtools: 39.06, prodigal: 2.6.3, busco: 5.6.1	104-17	0.326136	0.0394347	2922653	YES
104-18	C:100.0%[S:100.0%,D:0.0%],F:0.0%,M:0.0%,n:450	450	450	0	0	0	450	51	51	2876596	0	150	150	hmmsearch: 3.1, bbtools: 39.06, prodigal: 2.6.3, busco: 5.6.1	104-18	0.326111	0.0391929	2876596	YES
104-19	C:100.0%[S:100.0%,D:0.0%],F:0.0%,M:0.0%,n:450	450	450	0	0	0	450	53	53	2877922	0	154	154	hmmsearch: 3.1, bbtools: 39.06, prodigal: 2.6.3, busco: 5.6.1	104-19	0.326127	0.0372233	2877922	YES
104-2	C:100.0%[S:100.0%,D:0.0%],F:0.0%,M:0.0%,n:450	450	450	0	0	0	450	51	51	2875039	0	150	150	hmmsearch: 3.1, bbtools: 39.06, prodigal: 2.6.3, busco: 5.6.1	104-2	0.326126	0.0393298	2875039	YES
104-20	C:100.0%[S:100.0%,D:0.0%],F:0.0%,M:0.0%,n:450	450	450	0	0	0	450	51	51	2876872	0	150	150	hmmsearch: 3.1, bbtools: 39.06, prodigal: 2.6.3, busco: 5.6.1	104-20	0.326121	0.0373122	2876872	YES
104-21	C:100.0%[S:100.0%,D:0.0%],F:0.0%,M:0.0%,n:450	450	450	0	0	0	450	55	55	2836172	0	153	153	hmmsearch: 3.1, bbtools: 39.06, prodigal: 2.6.3, busco: 5.6.1	104-21	0.326322	0.0442038	2836172	YES
104-22	C:100.0%[S:100.0%,D:0.0%],F:0.0%,M:0.0%,n:450	450	450	0	0	0	450	52	52	2875466	0	125	125	hmmsearch: 3.1, bbtools: 39.06, prodigal: 2.6.3, busco: 5.6.1	104-22	0.326095	0.0455984	2875466	YES
104-23	C:100.0%[S:100.0%,D:0.0%],F:0.0%,M:0.0%,n:450	450	450	0	0	0	450	76	76	2870861	0	104	104	hmmsearch: 3.1, bbtools: 39.06, prodigal: 2.6.3, busco: 5.6.1	104-23	0.326236	0.0411886	2870861	YES
104-24	C:100.0%[S:100.0%,D:0.0%],F:0.0%,M:0.0%,n:450	450	450	0	0	0	450	51	51	2875578	0	150	150	hmmsearch: 3.1, bbtools: 39.06, prodigal: 2.6.3, busco: 5.6.1	104-24	0.326044	0.0366931	2875578	YES
104-25	C:100.0%[S:100.0%,D:0.0%],F:0.0%,M:0.0%,n:450	450	450	0	0	0	450	52	52	2876960	0	125	125	hmmsearch: 3.1, bbtools: 39.06, prodigal: 2.6.3, busco: 5.6.1	104-25	0.326133	0.0521992	2876960	YES
104-26	C:100.0%[S:100.0%,D:0.0%],F:0.0%,M:0.0%,n:450	450	450	0	0	0	450	47	47	2859897	0	170	170	hmmsearch: 3.1, bbtools: 39.06, prodigal: 2.6.3, busco: 5.6.1	104-26	0.326185	0.0362761	2859897	YES
104-4	C:100.0%[S:100.0%,D:0.0%],F:0.0%,M:0.0%,n:450	450	450	0	0	0	450	48	48	2875750	0	150	150	hmmsearch: 3.1, bbtools: 39.06, prodigal: 2.6.3, busco: 5.6.1	104-4	0.326055	0.0464029	2875750	YES
104-5	C:100.0%[S:100.0%,D:0.0%],F:0.0%,M:0.0%,n:450	450	450	0	0	0	450	66	66	2866831	0	135	135	hmmsearch: 3.1, bbtools: 39.06, prodigal: 2.6.3, busco: 5.6.1	104-5	0.326104	0.0340859	2866831	YES
104-6	C:100.0%[S:100.0%,D:0.0%],F:0.0%,M:0.0%,n:450	450	450	0	0	0	450	61	61	2872797	0	134	134	hmmsearch: 3.1, bbtools: 39.06, prodigal: 2.6.3, busco: 5.6.1	104-6	0.326085	0.0341362	2872797	YES
104-7	C:100.0%[S:100.0%,D:0.0%],F:0.0%,M:0.0%,n:450	450	450	0	0	0	450	47	47	2877732	0	154	154	hmmsearch: 3.1, bbtools: 39.06, prodigal: 2.6.3, busco: 5.6.1	104-7	0.326128	0.0476498	2877732	YES
104-8	C:100.0%[S:100.0%,D:0.0%],F:0.0%,M:0.0%,n:450	450	450	0	0	0	450	52	52	2876707	0	150	150	hmmsearch: 3.1, bbtools: 39.06, prodigal: 2.6.3, busco: 5.6.1	104-8	0.326128	0.0387553	2876707	YES
104-9	C:100.0%[S:100.0%,D:0.0%],F:0.0%,M:0.0%,n:450	450	450	0	0	0	450	49	49	2877852	0	154	154	hmmsearch: 3.1, bbtools: 39.06, prodigal: 2.6.3, busco: 5.6.1	104-9	0.326137	0.0400252	2877852	YES
105-3	C:100.0%[S:100.0%,D:0.0%],F:0.0%,M:0.0%,n:450	450	450	0	0	0	450	32	32	2808487	0	222	222	hmmsearch: 3.1, bbtools: 39.06, prodigal: 2.6.3, busco: 5.6.1	105-3	0.327031	0.0533419	2808487	YES
106-0	C:100.0%[S:100.0%,D:0.0%],F:0.0%,M:0.0%,n:450	450	450	0	0	0	450	46	46	2867177	0	180	180	hmmsearch: 3.1, bbtools: 39.06, prodigal: 2.6.3, busco: 5.6.1	106-0	0.326719	0.0553781	2867177	YES
106-1	C:100.0%[S:100.0%,D:0.0%],F:0.0%,M:0.0%,n:450	450	450	0	0	0	450	45	45	2867947	0	153	153	hmmsearch: 3.1, bbtools: 39.06, prodigal: 2.6.3, busco: 5.6.1	106-1	0.326726	0.0559851	2867947	YES
106-10	C:100.0%[S:100.0%,D:0.0%],F:0.0%,M:0.0%,n:450	450	450	0	0	0	450	48	48	2866106	0	153	153	hmmsearch: 3.1, bbtools: 39.06, prodigal: 2.6.3, busco: 5.6.1	106-10	0.326757	0.0458932	2866106	YES
106-11	C:100.0%[S:93.3%,D:6.7%],F:0.0%,M:0.0%,n:450	450	420	30	0	0	450	62	62	3180794	0	110	110	hmmsearch: 3.1, bbtools: 39.06, prodigal: 2.6.3, busco: 5.6.1	106-11	0.326734	0.0400553	3180794	YES
106-12	C:100.0%[S:100.0%,D:0.0%],F:0.0%,M:0.0%,n:450	450	450	0	0	0	450	53	53	2867484	0	131	131	hmmsearch: 3.1, bbtools: 39.06, prodigal: 2.6.3, busco: 5.6.1	106-12	0.32671	0.0519182	2867484	YES
106-13	C:100.0%[S:100.0%,D:0.0%],F:0.0%,M:0.0%,n:450	450	450	0	0	0	450	46	46	2866954	0	153	153	hmmsearch: 3.1, bbtools: 39.06, prodigal: 2.6.3, busco: 5.6.1	106-13	0.32666	0.0420772	2866954	YES
106-14	C:100.0%[S:100.0%,D:0.0%],F:0.0%,M:0.0%,n:450	450	450	0	0	0	450	50	50	2867680	0	153	153	hmmsearch: 3.1, bbtools: 39.06, prodigal: 2.6.3, busco: 5.6.1	106-14	0.326732	0.0453632	2867680	YES
106-15	C:100.0%[S:100.0%,D:0.0%],F:0.0%,M:0.0%,n:450	450	450	0	0	0	450	46	46	2866710	0	131	131	hmmsearch: 3.1, bbtools: 39.06, prodigal: 2.6.3, busco: 5.6.1	106-15	0.326651	0.0405091	2866710	YES
106-16	C:100.0%[S:99.3%,D:0.7%],F:0.0%,M:0.0%,n:450	450	447	3	0	0	450	52	52	2917787	0	131	131	hmmsearch: 3.1, bbtools: 39.06, prodigal: 2.6.3, busco: 5.6.1	106-16	0.326708	0.0534932	2917787	YES
106-17	C:100.0%[S:100.0%,D:0.0%],F:0.0%,M:0.0%,n:450	450	450	0	0	0	450	48	48	2867135	0	141	141	hmmsearch: 3.1, bbtools: 39.06, prodigal: 2.6.3, busco: 5.6.1	106-17	0.326732	0.0389721	2867135	YES
106-19	C:100.0%[S:99.3%,D:0.7%],F:0.0%,M:0.0%,n:450	450	447	3	0	0	450	79	79	2913109	0	89	89	hmmsearch: 3.1, bbtools: 39.06, prodigal: 2.6.3, busco: 5.6.1	106-19	0.326835	0.0429987	2913109	YES
106-2	C:99.8%[S:99.1%,D:0.7%],F:0.2%,M:0.0%,n:450	449	446	3	1	0	450	61	61	2918384	0	124	124	hmmsearch: 3.1, bbtools: 39.06, prodigal: 2.6.3, busco: 5.6.1	106-2	0.326716	0.0417597	2918384	YES
106-20	C:100.0%[S:100.0%,D:0.0%],F:0.0%,M:0.0%,n:450	450	450	0	0	0	450	63	63	2858705	0	95	95	hmmsearch: 3.1, bbtools: 39.06, prodigal: 2.6.3, busco: 5.6.1	106-20	0.326828	0.0356452	2858705	YES
106-21	C:100.0%[S:100.0%,D:0.0%],F:0.0%,M:0.0%,n:450	450	450	0	0	0	450	48	48	2865963	0	153	153	hmmsearch: 3.1, bbtools: 39.06, prodigal: 2.6.3, busco: 5.6.1	106-21	0.326662	0.0414508	2865963	YES
106-3	C:100.0%[S:99.3%,D:0.7%],F:0.0%,M:0.0%,n:450	450	447	3	0	0	450	59	59	2916311	0	131	131	hmmsearch: 3.1, bbtools: 39.06, prodigal: 2.6.3, busco: 5.6.1	106-3	0.326709	0.0416337	2916311	YES
106-4	C:100.0%[S:93.3%,D:6.7%],F:0.0%,M:0.0%,n:450	450	420	30	0	0	450	68	68	3090371	0	105	105	hmmsearch: 3.1, bbtools: 39.06, prodigal: 2.6.3, busco: 5.6.1	106-4	0.326356	0.0448959	3090371	YES
106-5	C:100.0%[S:100.0%,D:0.0%],F:0.0%,M:0.0%,n:450	450	450	0	0	0	450	51	51	2867412	0	153	153	hmmsearch: 3.1, bbtools: 39.06, prodigal: 2.6.3, busco: 5.6.1	106-5	0.326742	0.0388662	2867412	YES
106-6	C:100.0%[S:100.0%,D:0.0%],F:0.0%,M:0.0%,n:450	450	450	0	0	0	450	45	45	2867079	0	180	180	hmmsearch: 3.1, bbtools: 39.06, prodigal: 2.6.3, busco: 5.6.1	106-6	0.326721	0.0503919	2867079	YES
106-7	C:100.0%[S:100.0%,D:0.0%],F:0.0%,M:0.0%,n:450	450	450	0	0	0	450	43	43	2824177	0	153	153	hmmsearch: 3.1, bbtools: 39.06, prodigal: 2.6.3, busco: 5.6.1	106-7	0.326544	0.0480362	2824177	YES
106-8	C:100.0%[S:100.0%,D:0.0%],F:0.0%,M:0.0%,n:450	450	450	0	0	0	450	51	51	2867157	0	153	153	hmmsearch: 3.1, bbtools: 39.06, prodigal: 2.6.3, busco: 5.6.1	106-8	0.326722	0.047299	2867157	YES
106-9	C:100.0%[S:99.3%,D:0.7%],F:0.0%,M:0.0%,n:450	450	447	3	0	0	450	68	68	2915403	0	89	89	hmmsearch: 3.1, bbtools: 39.06, prodigal: 2.6.3, busco: 5.6.1	106-9	0.326782	0.0452868	2915403	YES
107-0	C:99.8%[S:99.8%,D:0.0%],F:0.0%,M:0.2%,n:450	449	449	0	0	1	450	26	26	2745043	0	384	384	hmmsearch: 3.1, bbtools: 39.06, prodigal: 2.6.3, busco: 5.6.1	107-0	0.327478	0.0602624	2745043	YES
107-1	C:99.8%[S:99.8%,D:0.0%],F:0.0%,M:0.2%,n:450	449	449	0	0	1	450	25	25	2745056	0	384	384	hmmsearch: 3.1, bbtools: 39.06, prodigal: 2.6.3, busco: 5.6.1	107-1	0.327456	0.0530621	2745056	YES
107-2	C:99.8%[S:99.8%,D:0.0%],F:0.0%,M:0.2%,n:450	449	449	0	0	1	450	27	27	2745295	0	384	384	hmmsearch: 3.1, bbtools: 39.06, prodigal: 2.6.3, busco: 5.6.1	107-2	0.327461	0.0627375	2745295	YES
107-3	C:99.7%[S:98.4%,D:1.3%],F:0.0%,M:0.3%,n:450	449	443	6	0	1	450	29	29	2822575	0	299	299	hmmsearch: 3.1, bbtools: 39.06, prodigal: 2.6.3, busco: 5.6.1	107-3	0.327337	0.0690728	2822575	YES
107-4	C:99.8%[S:99.8%,D:0.0%],F:0.0%,M:0.2%,n:450	449	449	0	0	1	450	29	29	2746085	0	299	299	hmmsearch: 3.1, bbtools: 39.06, prodigal: 2.6.3, busco: 5.6.1	107-4	0.327543	0.0599978	2746085	YES
111-1	C:99.8%[S:99.8%,D:0.0%],F:0.2%,M:0.0%,n:450	449	449	0	1	0	450	29	29	2739346	0	268	268	hmmsearch: 3.1, bbtools: 39.06, prodigal: 2.6.3, busco: 5.6.1	111-1	0.328085	0.0530551	2739346	YES
111-1.2	C:99.8%[S:99.8%,D:0.0%],F:0.2%,M:0.0%,n:450	449	449	0	1	0	450	26	26	2737736	0	268	268	hmmsearch: 3.1, bbtools: 39.06, prodigal: 2.6.3, busco: 5.6.1	111-1U	0.328004	0.0541714	2737736	YES
114-9	C:100.0%[S:100.0%,D:0.0%],F:0.0%,M:0.0%,n:450	450	450	0	0	0	450	29	29	2742004	0	194	194	hmmsearch: 3.1, bbtools: 39.06, prodigal: 2.6.3, busco: 5.6.1	114-9	0.326359	0.0630808	2742004	YES
119-0	C:100.0%[S:100.0%,D:0.0%],F:0.0%,M:0.0%,n:450	450	450	0	0	0	450	34	34	2711742	0	127	127	hmmsearch: 3.1, bbtools: 39.06, prodigal: 2.6.3, busco: 5.6.1	119-0.1	0.327476	0.0432927	2711742	YES
119-0.2	C:100.0%[S:100.0%,D:0.0%],F:0.0%,M:0.0%,n:450	450	450	0	0	0	450	36	36	2711626	0	127	127	hmmsearch: 3.1, bbtools: 39.06, prodigal: 2.6.3, busco: 5.6.1	119-0.2	0.327486	0.050615	2711626	YES
119-10	C:100.0%[S:100.0%,D:0.0%],F:0.0%,M:0.0%,n:450	450	450	0	0	0	450	47	47	2782610	0	120	120	hmmsearch: 3.1, bbtools: 39.06, prodigal: 2.6.3, busco: 5.6.1	119-10.1	0.327089	0.0392064	2782610	YES
119-10.2	C:100.0%[S:100.0%,D:0.0%],F:0.0%,M:0.0%,n:450	450	450	0	0	0	450	54	54	2789123	0	118	118	hmmsearch: 3.1, bbtools: 39.06, prodigal: 2.6.3, busco: 5.6.1	119-10.2	0.327044	0.040437	2789123	YES
119-11	C:100.0%[S:100.0%,D:0.0%],F:0.0%,M:0.0%,n:450	450	450	0	0	0	450	51	51	2781481	0	120	120	hmmsearch: 3.1, bbtools: 39.06, prodigal: 2.6.3, busco: 5.6.1	119-11.1	0.327081	0.0397487	2781481	YES
119-11.2	C:100.0%[S:100.0%,D:0.0%],F:0.0%,M:0.0%,n:450	450	450	0	0	0	450	54	54	2788722	0	120	120	hmmsearch: 3.1, bbtools: 39.06, prodigal: 2.6.3, busco: 5.6.11	119-11.2	0.326991	0.0395722	2788722	YES
119-6	C:100.0%[S:100.0%,D:0.0%],F:0.0%,M:0.0%,n:450	450	450	0	0	0	450	53	53	2789904	0	120	120	hmmsearch: 3.1, bbtools: 39.06, prodigal: 2.6.3, busco: 5.6.1	119-6	0.327072	0.0399544	2789904	YES
119-7.1	C:100.0%[S:100.0%,D:0.0%],F:0.0%,M:0.0%,n:450	450	450	0	0	0	450	53	53	2788684	0	120	120	hmmsearch: 3.1, bbtools: 39.06, prodigal: 2.6.3, busco: 5.6.1	119-7.1	0.326985	0.0403213	2788684	YES
119-7.2	C:100.0%[S:100.0%,D:0.0%],F:0.0%,M:0.0%,n:450	450	450	0	0	0	450	56	56	2789650	0	120	120	hmmsearch: 3.1, bbtools: 39.06, prodigal: 2.6.3, busco: 5.6.2	119-7.2	0.327046	0.03983	2789650	YES
119-7.3	C:100.0%[S:100.0%,D:0.0%],F:0.0%,M:0.0%,n:450	450	450	0	0	0	450	54	54	2788614	0	118	118	hmmsearch: 3.1, bbtools: 39.06, prodigal: 2.6.3, busco: 5.6.3	119-7.3	0.32699	0.0404641	2788614	YES
119-7.4	C:100.0%[S:100.0%,D:0.0%],F:0.0%,M:0.0%,n:450	450	450	0	0	0	450	55	55	2789703	0	120	120	hmmsearch: 3.1, bbtools: 39.06, prodigal: 2.6.3, busco: 5.6.4	119-7.4	0.327047	0.0400668	2789703	YES
119-7.5	C:100.0%[S:100.0%,D:0.0%],F:0.0%,M:0.0%,n:450	450	450	0	0	0	450	54	54	2789794	0	120	120	hmmsearch: 3.1, bbtools: 39.06, prodigal: 2.6.3, busco: 5.6.5	119-7.5	0.327054	0.0404869	2789794	YES
119-7.6	C:100.0%[S:100.0%,D:0.0%],F:0.0%,M:0.0%,n:450	450	450	0	0	0	450	53	53	2788851	0	120	120	hmmsearch: 3.1, bbtools: 39.06, prodigal: 2.6.3, busco: 5.6.6	119-7.6	0.326993	0.0409198	2788851	YES
119-7.7	C:100.0%[S:100.0%,D:0.0%],F:0.0%,M:0.0%,n:450	450	450	0	0	0	450	55	55	2789013	0	120	120	hmmsearch: 3.1, bbtools: 39.06, prodigal: 2.6.3, busco: 5.6.7	119-7.7	0.327057	0.0396455	2789013	YES
119-7.8	C:100.0%[S:100.0%,D:0.0%],F:0.0%,M:0.0%,n:450	450	450	0	0	0	450	44	44	2754166	0	126	126	hmmsearch: 3.1, bbtools: 39.06, prodigal: 2.6.3, busco: 5.6.1	119-7.8	0.327037	0.0415884	2754166	YES
119-7.9	C:100.0%[S:100.0%,D:0.0%],F:0.0%,M:0.0%,n:450	450	450	0	0	0	450	53	53	2789466	0	120	120	hmmsearch: 3.1, bbtools: 39.06, prodigal: 2.6.3, busco: 5.6.8	119-7.9	0.32705	0.0405101	2789466	YES
119-8.1	C:100.0%[S:100.0%,D:0.0%],F:0.0%,M:0.0%,n:450	450	450	0	0	0	450	54	54	2788697	0	120	120	hmmsearch: 3.1, bbtools: 39.06, prodigal: 2.6.3, busco: 5.6.1	119-8.1	0.326983	0.0406426	2788697	YES
119-8.2	C:99.8%[S:99.8%,D:0.0%],F:0.0%,M:0.2%,n:450	449	449	0	0	1	450	53	53	2776781	0	114	114	hmmsearch: 3.1, bbtools: 39.06, prodigal: 2.6.3, busco: 5.6.9	119-8.2	0.327038	0.0400666	2776781	YES
119-8.3	C:100.0%[S:100.0%,D:0.0%],F:0.0%,M:0.0%,n:450	450	450	0	0	0	450	54	54	2789345	0	120	120	hmmsearch: 3.1, bbtools: 39.06, prodigal: 2.6.3, busco: 5.6.1	119-8.3	0.327038	0.040266	2789345	YES
119-8.4	C:100.0%[S:100.0%,D:0.0%],F:0.0%,M:0.0%,n:450	450	450	0	0	0	450	51	51	2789243	0	120	120	hmmsearch: 3.1, bbtools: 39.06, prodigal: 2.6.3, busco: 5.6.10	119-8.4	0.327064	0.0399319	2789243	YES
119-9	C:100.0%[S:100.0%,D:0.0%],F:0.0%,M:0.0%,n:450	450	450	0	0	0	450	55	55	2789507	0	120	120	hmmsearch: 3.1, bbtools: 39.06, prodigal: 2.6.3, busco: 5.6.1	119-9	0.327045	0.0395334	2789507	YES
129-0	C:100.0%[S:100.0%,D:0.0%],F:0.0%,M:0.0%,n:450	450	450	0	0	0	450	30	30	2770509	0	237	237	hmmsearch: 3.1, bbtools: 39.06, prodigal: 2.6.3, busco: 5.6.1	129-0	0.326864	0.0630645	2770509	YES
129-1	C:100.0%[S:100.0%,D:0.0%],F:0.0%,M:0.0%,n:450	450	450	0	0	0	450	31	31	2763620	0	237	237	hmmsearch: 3.1, bbtools: 39.06, prodigal: 2.6.3, busco: 5.6.1	129-1	0.32686	0.0620116	2763620	YES
201-0	C:100.0%[S:100.0%,D:0.0%],F:0.0%,M:0.0%,n:450	450	450	0	0	0	450	39	39	2860408	0	159	159	hmmsearch: 3.1, bbtools: 39.06, prodigal: 2.6.3, busco: 5.6.1	201-0	0.327096	0.041477	2860408	YES
201-1	C:99.6%[S:99.6%,D:0.0%],F:0.4%,M:0.0%,n:450	448	448	0	2	0	450	34	34	2861189	0	199	199	hmmsearch: 3.1, bbtools: 39.06, prodigal: 2.6.3, busco: 5.6.1	201-1	0.327176	0.0507934	2861189	YES
201-11	C:99.6%[S:99.6%,D:0.0%],F:0.4%,M:0.0%,n:450	448	448	0	2	0	450	34	34	2862072	0	199	199	hmmsearch: 3.1, bbtools: 39.06, prodigal: 2.6.3, busco: 5.6.1	201-11	0.327177	0.0523214	2862072	YES
201-12	C:100.0%[S:100.0%,D:0.0%],F:0.0%,M:0.0%,n:450	450	450	0	0	0	450	31	31	2862317	0	187	187	hmmsearch: 3.1, bbtools: 39.06, prodigal: 2.6.3, busco: 5.6.1	201-12.2	0.327194	0.0332221	2862317	YES
201-12.2	C:99.8%[S:99.8%,D:0.0%],F:0.2%,M:0.0%,n:450	449	449	0	1	0	450	35	35	2788649	0	177	177	hmmsearch: 3.1, bbtools: 39.06, prodigal: 2.6.3, busco: 5.6.1	201-12.1	0.327682	0.0412446	2788649	YES
201-14	C:100.0%[S:100.0%,D:0.0%],F:0.0%,M:0.0%,n:450	450	450	0	0	0	450	32	32	2861904	0	187	187	hmmsearch: 3.1, bbtools: 39.06, prodigal: 2.6.3, busco: 5.6.1	201-14.1	0.32719	0.0324959	2861904	YES
201-14.2	C:99.8%[S:99.8%,D:0.0%],F:0.2%,M:0.0%,n:450	449	449	0	1	0	450	35	35	2789303	0	219	219	hmmsearch: 3.1, bbtools: 39.06, prodigal: 2.6.3, busco: 5.6.1	201-14.2	0.32773	0.0396961	2789303	YES
201-15	C:99.8%[S:99.8%,D:0.0%],F:0.2%,M:0.0%,n:450	449	449	0	1	0	450	33	33	2789185	0	187	187	hmmsearch: 3.1, bbtools: 39.06, prodigal: 2.6.3, busco: 5.6.1	201-15	0.327745	0.0408281	2789185	YES
201-17	C:99.8%[S:99.8%,D:0.0%],F:0.2%,M:0.0%,n:450	449	449	0	1	0	450	38	38	2789017	0	187	187	hmmsearch: 3.1, bbtools: 39.06, prodigal: 2.6.3, busco: 5.6.1	201-17	0.327698	0.046274	2789017	YES
201-2	C:99.6%[S:99.6%,D:0.0%],F:0.4%,M:0.0%,n:450	448	448	0	2	0	450	33	33	2859728	0	159	159	hmmsearch: 3.1, bbtools: 39.06, prodigal: 2.6.3, busco: 5.6.1	201-2	0.327103	0.0454904	2859728	YES
201-3	C:100.0%[S:100.0%,D:0.0%],F:0.0%,M:0.0%,n:450	450	450	0	0	0	450	33	33	2860842	0	151	151	hmmsearch: 3.1, bbtools: 39.06, prodigal: 2.6.3, busco: 5.6.1	201-3	0.327099	0.0160974	2860842	YES
201-4	C:100.0%[S:100.0%,D:0.0%],F:0.0%,M:0.0%,n:450	450	450	0	0	0	450	39	39	2860694	0	151	151	hmmsearch: 3.1, bbtools: 39.06, prodigal: 2.6.3, busco: 5.6.1	201-4	0.327105	0.0315827	2860694	YES
201-6	C:99.8%[S:99.8%,D:0.0%],F:0.2%,M:0.0%,n:450	449	449	0	1	0	450	34	34	2789225	0	159	159	hmmsearch: 3.1, bbtools: 39.06, prodigal: 2.6.3, busco: 5.6.1	201-6	0.327681	0.0289123	2789225	YES
201-7	C:99.6%[S:99.6%,D:0.0%],F:0.4%,M:0.0%,n:450	448	448	0	2	0	450	36	36	2862218	0	199	199	hmmsearch: 3.1, bbtools: 39.06, prodigal: 2.6.3, busco: 5.6.1	201-7	0.32722	0.0515811	2862218	YES
201-9	C:99.6%[S:99.6%,D:0.0%],F:0.4%,M:0.0%,n:450	448	448	0	2	0	450	33	33	2861009	0	199	199	hmmsearch: 3.1, bbtools: 39.06, prodigal: 2.6.3, busco: 5.6.1	201-9.1	0.327113	0.0457059	2861009	YES
201-9.2	C:99.8%[S:99.8%,D:0.0%],F:0.2%,M:0.0%,n:450	449	449	0	1	0	450	36	36	2817448	0	148	148	hmmsearch: 3.1, bbtools: 39.06, prodigal: 2.6.3, busco: 5.6.1	201-9.2	0.32679	0.0392166	2817448	YES
203-10	C:99.8%[S:99.8%,D:0.0%],F:0.2%,M:0.0%,n:450	449	449	0	1	0	450	33	33	2848026	0	220	220	hmmsearch: 3.1, bbtools: 39.06, prodigal: 2.6.3, busco: 5.6.1	203-10	0.326573	0.0511849	2848026	YES
203-12	C:99.8%[S:99.8%,D:0.0%],F:0.2%,M:0.0%,n:450	449	449	0	1	0	450	41	41	2824730	0	167	167	hmmsearch: 3.1, bbtools: 39.06, prodigal: 2.6.3, busco: 5.6.1	203-12	0.327016	0.0579024	2824730	YES
203-13	C:99.8%[S:99.1%,D:0.7%],F:0.2%,M:0.0%,n:450	449	446	3	1	0	450	57	57	2898711	0	169	169	hmmsearch: 3.1, bbtools: 39.06, prodigal: 2.6.3, busco: 5.6.1	203-13	0.326538	0.0525785	2898711	YES
203-14	C:99.8%[S:99.8%,D:0.0%],F:0.2%,M:0.0%,n:450	449	449	0	1	0	450	48	48	2847079	0	167	167	hmmsearch: 3.1, bbtools: 39.06, prodigal: 2.6.3, busco: 5.6.1	203-14	0.326479	0.0486608	2847079	YES
203-15	C:99.8%[S:99.8%,D:0.0%],F:0.2%,M:0.0%,n:450	449	449	0	1	0	450	33	33	2846584	0	243	243	hmmsearch: 3.1, bbtools: 39.06, prodigal: 2.6.3, busco: 5.6.1	203-15	0.326574	0.0570851	2846584	YES
203-16	C:99.8%[S:99.8%,D:0.0%],F:0.2%,M:0.0%,n:450	449	449	0	1	0	450	57	57	2848639	0	168	168	hmmsearch: 3.1, bbtools: 39.06, prodigal: 2.6.3, busco: 5.6.1	203-16	0.326573	0.0475989	2848639	YES
203-17	C:99.8%[S:99.8%,D:0.0%],F:0.2%,M:0.0%,n:450	449	449	0	1	0	450	33	33	2824118	0	220	220	hmmsearch: 3.1, bbtools: 39.06, prodigal: 2.6.3, busco: 5.6.1	203-17	0.327007	0.0619447	2824118	YES
203-18	C:99.8%[S:99.8%,D:0.0%],F:0.2%,M:0.0%,n:450	449	449	0	1	0	450	43	43	2825269	0	169	169	hmmsearch: 3.1, bbtools: 39.06, prodigal: 2.6.3, busco: 5.6.12	203-18	0.327039	0.0498753	2825269	YES
203-19	C:99.8%[S:99.8%,D:0.0%],F:0.2%,M:0.0%,n:450	449	449	0	1	0	450	29	29	2827464	0	243	243	hmmsearch: 3.1, bbtools: 39.06, prodigal: 2.6.3, busco: 5.6.1	203-19	0.3268	0.0659258	2827464	YES
203-20	C:99.8%[S:99.8%,D:0.0%],F:0.2%,M:0.0%,n:450	449	449	0	1	0	450	32	32	2847777	0	220	220	hmmsearch: 3.1, bbtools: 39.06, prodigal: 2.6.3, busco: 5.6.1	203-20	0.326576	0.0560653	2847777	YES
203-9	C:99.8%[S:99.8%,D:0.0%],F:0.2%,M:0.0%,n:450	449	449	0	1	0	450	27	27	2824840	0	222	222	hmmsearch: 3.1, bbtools: 39.06, prodigal: 2.6.3, busco: 5.6.1	203-9	0.326999	0.0593323	2824840	YES
204-15	C:100.0%[S:100.0%,D:0.0%],F:0.0%,M:0.0%,n:450	450	450	0	0	0	450	48	48	2798432	0	141	141	hmmsearch: 3.1, bbtools: 39.06, prodigal: 2.6.3, busco: 5.6.1	204-15	0.326788	0.0406065	2798432	YES
207-0	C:100.0%[S:100.0%,D:0.0%],F:0.0%,M:0.0%,n:450	450	450	0	0	0	450	34	34	2726747	0	301	301	hmmsearch: 3.1, bbtools: 39.06, prodigal: 2.6.3, busco: 5.6.1	207-0	0.327654	0.0562861	2726747	YES
207-1	C:100.0%[S:100.0%,D:0.0%],F:0.0%,M:0.0%,n:450	450	450	0	0	0	450	30	30	2727129	0	382	382	hmmsearch: 3.1, bbtools: 39.06, prodigal: 2.6.3, busco: 5.6.1	207-1	0.327657	0.0594223	2727129	YES
207-10	C:100.0%[S:100.0%,D:0.0%],F:0.0%,M:0.0%,n:450	450	450	0	0	0	450	32	32	2723109	0	301	301	hmmsearch: 3.1, bbtools: 39.06, prodigal: 2.6.3, busco: 5.6.1	207-10	0.327699	0.0586534	2723109	YES
207-11	C:100.0%[S:100.0%,D:0.0%],F:0.0%,M:0.0%,n:450	450	450	0	0	0	450	30	30	2722900	0	428	428	hmmsearch: 3.1, bbtools: 39.06, prodigal: 2.6.3, busco: 5.6.1	207-11	0.327654	0.0592972	2722900	YES
207-12	C:100.0%[S:100.0%,D:0.0%],F:0.0%,M:0.0%,n:450	450	450	0	0	0	450	32	32	2727754	0	382	382	hmmsearch: 3.1, bbtools: 39.06, prodigal: 2.6.3, busco: 5.6.1	207-12	0.327665	0.0582864	2727754	YES
207-14	C:100.0%[S:100.0%,D:0.0%],F:0.0%,M:0.0%,n:450	450	450	0	0	0	450	32	32	2726983	0	382	382	hmmsearch: 3.1, bbtools: 39.06, prodigal: 2.6.3, busco: 5.6.1	207-14	0.327682	0.0573052	2726983	YES
207-16	C:100.0%[S:100.0%,D:0.0%],F:0.0%,M:0.0%,n:450	450	450	0	0	0	450	34	34	2726508	0	301	301	hmmsearch: 3.1, bbtools: 39.06, prodigal: 2.6.3, busco: 5.6.1	207-16	0.327646	0.0562853	2726508	YES
207-17	C:99.8%[S:99.8%,D:0.0%],F:0.2%,M:0.0%,n:450	449	449	0	1	0	450	32	32	2728339	0	382	382	hmmsearch: 3.1, bbtools: 39.06, prodigal: 2.6.3, busco: 5.6.1	207-17	0.327696	0.060586	2728339	YES
207-2	C:100.0%[S:100.0%,D:0.0%],F:0.0%,M:0.0%,n:450	450	450	0	0	0	450	65	65	2729985	0	107	107	hmmsearch: 3.1, bbtools: 39.06, prodigal: 2.6.3, busco: 5.6.1	207-2	0.327656	0.0355189	2729985	YES
207-3	C:100.0%[S:100.0%,D:0.0%],F:0.0%,M:0.0%,n:450	450	450	0	0	0	450	33	33	2726743	0	428	428	hmmsearch: 3.1, bbtools: 39.06, prodigal: 2.6.3, busco: 5.6.1	207-3	0.327632	0.056884	2726743	YES
207-4	C:100.0%[S:100.0%,D:0.0%],F:0.0%,M:0.0%,n:450	450	450	0	0	0	450	49	49	2726959	0	124	124	hmmsearch: 3.1, bbtools: 39.06, prodigal: 2.6.3, busco: 5.6.1	207-4	0.327574	0.0460401	2726959	YES
207-5	C:100.0%[S:100.0%,D:0.0%],F:0.0%,M:0.0%,n:450	450	450	0	0	0	450	38	38	2728175	0	301	301	hmmsearch: 3.1, bbtools: 39.06, prodigal: 2.6.3, busco: 5.6.1	207-5	0.327686	0.0553312	2728175	YES
207-6	C:100.0%[S:100.0%,D:0.0%],F:0.0%,M:0.0%,n:450	450	450	0	0	0	450	34	34	2727964	0	428	428	hmmsearch: 3.1, bbtools: 39.06, prodigal: 2.6.3, busco: 5.6.1	207-6	0.327701	0.0585001	2727964	YES
207-7	C:100.0%[S:100.0%,D:0.0%],F:0.0%,M:0.0%,n:450	450	450	0	0	0	450	33	33	2727425	0	310	310	hmmsearch: 3.1, bbtools: 39.06, prodigal: 2.6.3, busco: 5.6.1	207-7	0.327656	0.0570267	2727425	YES
207-8	C:100.0%[S:100.0%,D:0.0%],F:0.0%,M:0.0%,n:450	450	450	0	0	0	450	32	32	2723602	0	301	301	hmmsearch: 3.1, bbtools: 39.06, prodigal: 2.6.3, busco: 5.6.1	207-8	0.32771	0.058103	2723602	YES
207-9	C:100.0%[S:100.0%,D:0.0%],F:0.0%,M:0.0%,n:450	450	450	0	0	0	450	33	33	2727820	0	428	428	hmmsearch: 3.1, bbtools: 39.06, prodigal: 2.6.3, busco: 5.6.1	207-9	0.327689	0.0595829	2727820	YES
210-0	C:100.0%[S:100.0%,D:0.0%],F:0.0%,M:0.0%,n:450	450	450	0	0	0	450	52	52	2819873	0	153	153	hmmsearch: 3.1, bbtools: 39.06, prodigal: 2.6.3, busco: 5.6.1	210-0	0.327079	0.0504286	2819873	YES
210-6	C:100.0%[S:100.0%,D:0.0%],F:0.0%,M:0.0%,n:450	450	450	0	0	0	450	60	60	2855375	0	134	134	hmmsearch: 3.1, bbtools: 39.06, prodigal: 2.6.3, busco: 5.6.1	210-6	0.3265	0.0485309	2855375	YES
57-0	C:100.0%[S:100.0%,D:0.0%],F:0.0%,M:0.0%,n:450	450	450	0	0	0	450	39	39	2870082	0	169	169	hmmsearch: 3.1, bbtools: 39.06, prodigal: 2.6.3, busco: 5.6.1	57-0	0.327213	0.0438068	2870082	YES
86-0	C:100.0%[S:100.0%,D:0.0%],F:0.0%,M:0.0%,n:450	450	450	0	0	0	450	22	22	2782719	0	285	285	hmmsearch: 3.1, bbtools: 39.06, prodigal: 2.6.3, busco: 5.6.1	86-0	0.326881	0.0597786	2782719	YES
86-10	C:99.8%[S:99.8%,D:0.0%],F:0.0%,M:0.2%,n:450	449	449	0	0	1	450	22	22	2781569	0	299	299	hmmsearch: 3.1, bbtools: 39.06, prodigal: 2.6.3, busco: 5.6.1	86-10	0.326904	0.0597237	2781569	YES
86-10.2	C:99.8%[S:99.8%,D:0.0%],F:0.0%,M:0.2%,n:450	449	449	0	0	1	450	25	25	2781497	0	299	299	hmmsearch: 3.1, bbtools: 39.06, prodigal: 2.6.3, busco: 5.6.1	86-10CY	0.32696	0.0611231	2781497	YES
86-2	C:99.8%[S:99.8%,D:0.0%],F:0.2%,M:0.0%,n:450	449	449	0	1	0	450	25	25	2782857	0	285	285	hmmsearch: 3.1, bbtools: 39.06, prodigal: 2.6.3, busco: 5.6.1	86-2	0.326894	0.0665278	2782857	YES
86-7	C:100.0%[S:100.0%,D:0.0%],F:0.0%,M:0.0%,n:450	450	450	0	0	0	450	25	25	2784119	0	285	285	hmmsearch: 3.1, bbtools: 39.06, prodigal: 2.6.3, busco: 5.6.1	86-7	0.326938	0.0610266	2784119	YES
86-7U	C:100.0%[S:100.0%,D:0.0%],F:0.0%,M:0.0%,n:450	450	450	0	0	0	450	25	25	2782297	0	285	285	hmmsearch: 3.1, bbtools: 39.06, prodigal: 2.6.3, busco: 5.6.1	86-7U	0.326875	0.0652905	2782297	YES
95-0	C:100.0%[S:100.0%,D:0.0%],F:0.0%,M:0.0%,n:450	450	450	0	0	0	450	39	39	2759580	0	170	170	hmmsearch: 3.1, bbtools: 39.06, prodigal: 2.6.3, busco: 5.6.1	95-0	0.32721	0.0425752	2759580	YES
97-2	C:100.0%[S:100.0%,D:0.0%],F:0.0%,M:0.0%,n:450	450	450	0	0	0	450	45	45	2818586	0	220	220	hmmsearch: 3.1, bbtools: 39.06, prodigal: 2.6.3, busco: 5.6.1	97-2	0.32736	0.0567422	2818586	YES
MRSA-1369	C:100.0%[S:100.0%,D:0.0%],F:0.0%,M:0.0%,n:450	450	450	0	0	0	450	32	32	2857682	0	283	283	hmmsearch: 3.1, bbtools: 39.06, prodigal: 2.6.3, busco: 5.6.1	MRSA-1369	0.326062	0.0545647	2857682	YES
																			YES
																			YES

## Sheet: Table S4 
Gene	Non-unique_Gene_name	Annotation	No._isolates	No._sequences	Avg_sequences_per_isolate	Genome_Fragment	Order_within_Fragment	Accessory_Fragment	Accessory_Order_with_Fragment	QC	Min_group_size_nuc	Max_group_size_nuc	Avg_group_size_nuc		MRSA-1369	86-0	86-2	95-0	97-2	100-0	100-1	111-1	111-1.2	86-7.2	86-7	105-3	86-10.2	86-10	114-9	119-0.2	119-0	129-0	119-6	129-1	119-7.2	119-7.3	119-7	119-7.4	119-7.5	119-7.6	119-7.7	119-7.8	119-7.9	119-8.1	119-8.2	119-8.3	119-8.4	119-9	119-10.2
manR		Transcriptional regulator ManR	172	172	1	11	5024				917	1874	1868		1	1	1	1	1	1	1	1	1	1	1	1	1	1	1	1	1	1	1	1	1	1	1	1	1	1	1	1	1	1	1	1	1	1	1
group_1004		hypothetical protein	172	172	1	11	4986				500	500	500		1	1	1	1	1	1	1	1	1	1	1	1	1	1	1	1	1	1	1	1	1	1	1	1	1	1	1	1	1	1	1	1	1	1	1
icaB		Poly-beta-1,6-N-acetyl-D-glucosamine N-deacetylase	172	172	1	11	4976				392	872	868		1	1	1	1	1	1	1	1	1	1	1	1	1	1	1	1	1	1	1	1	1	1	1	1	1	1	1	1	1	1	1	1	1	1	1
hisH		Imidazole glycerol phosphate synthase subunit HisH	172	172	1	11	4966				578	578	578		1	1	1	1	1	1	1	1	1	1	1	1	1	1	1	1	1	1	1	1	1	1	1	1	1	1	1	1	1	1	1	1	1	1	1
group_1007		hypothetical protein	172	172	1	11	4960				1124	1124	1124		1	1	1	1	1	1	1	1	1	1	1	1	1	1	1	1	1	1	1	1	1	1	1	1	1	1	1	1	1	1	1	1	1	1	1
group_1009		hypothetical protein	172	172	1	11	4954				515	515	515		1	1	1	1	1	1	1	1	1	1	1	1	1	1	1	1	1	1	1	1	1	1	1	1	1	1	1	1	1	1	1	1	1	1	1
bceB_2		Bacitracin export permease protein BceB	172	172	1	11	4939				1880	1880	1880		1	1	1	1	1	1	1	1	1	1	1	1	1	1	1	1	1	1	1	1	1	1	1	1	1	1	1	1	1	1	1	1	1	1	1
gyrB		DNA gyrase subunit B	172	172	1	11	4920				494	1934	1925		1	1	1	1	1	1	1	1	1	1	1	1	1	1	1	1	1	1	1	1	1	1	1	1	1	1	1	1	1	1	1	1	1	1	1
metXA		Homoserine O-acetyltransferase	172	172	1	11	4913				557	968	941		1	1	1	1	1	1	1	1	1	1	1	1	1	1	1	1	1	1	1	1	1	1	1	1	1	1	1	1	1	1	1	1	1	1	1
tag		DNA-3-methyladenine glycosylase 1	172	172	1	11	3047				560	560	560		1	1	1	1	1	1	1	1	1	1	1	1	1	1	1	1	1	1	1	1	1	1	1	1	1	1	1	1	1	1	1	1	1	1	1
comC		Type 4 prepilin-like proteins leader peptide-processing enzyme	172	172	1	11	3050				707	707	707		1	1	1	1	1	1	1	1	1	1	1	1	1	1	1	1	1	1	1	1	1	1	1	1	1	1	1	1	1	1	1	1	1	1	1
pxpC_1		5-oxoprolinase subunit C	172	172	1	11	3095				1010	1010	1010		1	1	1	1	1	1	1	1	1	1	1	1	1	1	1	1	1	1	1	1	1	1	1	1	1	1	1	1	1	1	1	1	1	1	1
trmK		tRNA (adenine(22)-N(1))-methyltransferase	172	172	1	11	3142				677	677	677		1	1	1	1	1	1	1	1	1	1	1	1	1	1	1	1	1	1	1	1	1	1	1	1	1	1	1	1	1	1	1	1	1	1	1
group_1032		GTP cyclohydrolase 1 type 2	172	172	1	11	3143				1100	1100	1100		1	1	1	1	1	1	1	1	1	1	1	1	1	1	1	1	1	1	1	1	1	1	1	1	1	1	1	1	1	1	1	1	1	1	1
comGA		ComG operon protein 1	172	172	1	11	3157				239	974	968		1	1	1	1	1	1	1	1	1	1	1	1	1	1	1	1	1	1	1	1	1	1	1	1	1	1	1	1	1	1	1	1	1	1	1
lnrL_3		Linearmycin resistance ATP-binding protein LnrL	172	172	1	11	5842				641	899	824		1	1	1	1	1	1	1	1	1	1	1	1	1	1	1	1	1	1	1	1	1	1	1	1	1	1	1	1	1	1	1	1	1	1	1
lyrA		Lysostaphin resistance protein A	172	172	1	11	5848				1256	1259	1258		1	1	1	1	1	1	1	1	1	1	1	1	1	1	1	1	1	1	1	1	1	1	1	1	1	1	1	1	1	1	1	1	1	1	1
group_1053		hypothetical protein	172	172	1	11	5867				356	356	356		1	1	1	1	1	1	1	1	1	1	1	1	1	1	1	1	1	1	1	1	1	1	1	1	1	1	1	1	1	1	1	1	1	1	1
group_1055		hypothetical protein	172	172	1	11	5871				737	737	737		1	1	1	1	1	1	1	1	1	1	1	1	1	1	1	1	1	1	1	1	1	1	1	1	1	1	1	1	1	1	1	1	1	1	1
group_1057		hypothetical protein	172	172	1	11	5883				422	422	422		1	1	1	1	1	1	1	1	1	1	1	1	1	1	1	1	1	1	1	1	1	1	1	1	1	1	1	1	1	1	1	1	1	1	1
ydbM		Putative acyl-CoA dehydrogenase YdbM	172	172	1	11	165				182	1172	1144		1	1	1	1	1	1	1	1	1	1	1	1	1	1	1	1	1	1	1	1	1	1	1	1	1	1	1	1	1	1	1	1	1	1	1
sbcC		Nuclease SbcCD subunit C	172	172	1	11	3418				743	3029	2992		1	1	1	1	1	1	1	1	1	1	1	1	1	1	1	1	1	1	1	1	1	1	1	1	1	1	1	1	1	1	1	1	1	1	1
modA		Molybdate-binding protein ModA	172	172	1	11	159				782	782	782		1	1	1	1	1	1	1	1	1	1	1	1	1	1	1	1	1	1	1	1	1	1	1	1	1	1	1	1	1	1	1	1	1	1	1
moaB		Molybdenum cofactor biosynthesis protein B	172	172	1	11	155				506	506	506		1	1	1	1	1	1	1	1	1	1	1	1	1	1	1	1	1	1	1	1	1	1	1	1	1	1	1	1	1	1	1	1	1	1	1
sarV		HTH-type transcriptional regulator SarV	172	172	1	11	147				179	350	339		1	1	1	1	1	1	1	1	1	1	1	1	1	1	1	1	1	1	1	1	1	1	1	1	1	1	1	1	1	1	1	1	1	1	1
ecfA1		Energy-coupling factor transporter ATP-binding protein EcfA1	172	172	1	11	99				809	809	809		1	1	1	1	1	1	1	1	1	1	1	1	1	1	1	1	1	1	1	1	1	1	1	1	1	1	1	1	1	1	1	1	1	1	1
aldC_2		Alpha-acetolactate decarboxylase	172	172	1	11	82				704	704	704		1	1	1	1	1	1	1	1	1	1	1	1	1	1	1	1	1	1	1	1	1	1	1	1	1	1	1	1	1	1	1	1	1	1	1
map_1		Protein map	172	172	1	11	81				425	425	425		1	1	1	1	1	1	1	1	1	1	1	1	1	1	1	1	1	1	1	1	1	1	1	1	1	1	1	1	1	1	1	1	1	1	1
yfmJ		Putative NADP-dependent oxidoreductase YfmJ	172	172	1	11	60				1004	1004	1004		1	1	1	1	1	1	1	1	1	1	1	1	1	1	1	1	1	1	1	1	1	1	1	1	1	1	1	1	1	1	1	1	1	1	1
group_1085		putative HTH-type transcriptional regulator	172	172	1	11	5815				443	443	443		1	1	1	1	1	1	1	1	1	1	1	1	1	1	1	1	1	1	1	1	1	1	1	1	1	1	1	1	1	1	1	1	1	1	1
yhfP		Putative quinone oxidoreductase YhfP	172	172	1	11	5808				1004	1004	1004		1	1	1	1	1	1	1	1	1	1	1	1	1	1	1	1	1	1	1	1	1	1	1	1	1	1	1	1	1	1	1	1	1	1	1
ydaG		General stress protein 26	172	172	1	11	5795				422	422	422		1	1	1	1	1	1	1	1	1	1	1	1	1	1	1	1	1	1	1	1	1	1	1	1	1	1	1	1	1	1	1	1	1	1	1
group_1094		hypothetical protein	172	172	1	11	5718				542	575	574		1	1	1	1	1	1	1	1	1	1	1	1	1	1	1	1	1	1	1	1	1	1	1	1	1	1	1	1	1	1	1	1	1	1	1
tcyC_1		L-cystine import ATP-binding protein TcyC	172	172	1	11	5696				731	731	731		1	1	1	1	1	1	1	1	1	1	1	1	1	1	1	1	1	1	1	1	1	1	1	1	1	1	1	1	1	1	1	1	1	1	1
group_1100		hypothetical protein	172	172	1	11	5682				467	467	467		1	1	1	1	1	1	1	1	1	1	1	1	1	1	1	1	1	1	1	1	1	1	1	1	1	1	1	1	1	1	1	1	1	1	1
group_1103		8-amino-7-oxononanoate synthase/2-amino-3-ketobutyrate coenzyme A ligase	172	172	1	11	5680				1112	1115	1114		1	1	1	1	1	1	1	1	1	1	1	1	1	1	1	1	1	1	1	1	1	1	1	1	1	1	1	1	1	1	1	1	1	1	1
bioD		ATP-dependent dethiobiotin synthetase BioD	172	172	1	11	5677				686	686	686		1	1	1	1	1	1	1	1	1	1	1	1	1	1	1	1	1	1	1	1	1	1	1	1	1	1	1	1	1	1	1	1	1	1	1
yveA		Aspartate-proton symporter	172	172	1	11	5652				1469	1637	1620		1	1	1	1	1	1	1	1	1	1	1	1	1	1	1	1	1	1	1	1	1	1	1	1	1	1	1	1	1	1	1	1	1	1	1
group_1127		hypothetical protein	172	172	1	11	3311				1301	1340	1335		1	1	1	1	1	1	1	1	1	1	1	1	1	1	1	1	1	1	1	1	1	1	1	1	1	1	1	1	1	1	1	1	1	1	1
aroA_2		3-phosphoshikimate 1-carboxyvinyltransferase	172	172	1	11	3288				1298	1298	1298		1	1	1	1	1	1	1	1	1	1	1	1	1	1	1	1	1	1	1	1	1	1	1	1	1	1	1	1	1	1	1	1	1	1	1
group_1142		Protein SprT-like protein	172	172	1	11	3752				455	455	455		1	1	1	1	1	1	1	1	1	1	1	1	1	1	1	1	1	1	1	1	1	1	1	1	1	1	1	1	1	1	1	1	1	1	1
rsbU		Phosphoserine phosphatase RsbU	172	172	1	11	3757				626	1001	981		1	1	1	1	1	1	1	1	1	1	1	1	1	1	1	1	1	1	1	1	1	1	1	1	1	1	1	1	1	1	1	1	1	1	1
group_1145		hypothetical protein	172	172	1	11	3763				422	494	493		1	1	1	1	1	1	1	1	1	1	1	1	1	1	1	1	1	1	1	1	1	1	1	1	1	1	1	1	1	1	1	1	1	1	1
kdpA		Potassium-transporting ATPase potassium-binding subunit	172	172	1	11	3768				1430	1676	1674		1	1	1	1	1	1	1	1	1	1	1	1	1	1	1	1	1	1	1	1	1	1	1	1	1	1	1	1	1	1	1	1	1	1	1
kdpE		KDP operon transcriptional regulatory protein KdpE	172	172	1	11	3770				407	695	692		1	1	1	1	1	1	1	1	1	1	1	1	1	1	1	1	1	1	1	1	1	1	1	1	1	1	1	1	1	1	1	1	1	1	1
yedJ		putative protein YedJ	172	172	1	11	3860				590	647	641		1	1	1	1	1	1	1	1	1	1	1	1	1	1	1	1	1	1	1	1	1	1	1	1	1	1	1	1	1	1	1	1	1	1	1
tenA		Aminopyrimidine aminohydrolase	172	172	1	11	3854				689	689	689		1	1	1	1	1	1	1	1	1	1	1	1	1	1	1	1	1	1	1	1	1	1	1	1	1	1	1	1	1	1	1	1	1	1	1
group_1156		hypothetical protein	172	172	1	11	3795				473	2132	2122		1	1	1	1	1	1	1	1	1	1	1	1	1	1	1	1	1	1	1	1	1	1	1	1	1	1	1	1	1	1	1	1	1	1	1
group_1157		NAD-dependent malic enzyme	172	172	1	11	3012				548	1229	1221		1	1	1	1	1	1	1	1	1	1	1	1	1	1	1	1	1	1	1	1	1	1	1	1	1	1	1	1	1	1	1	1	1	1	1
dnaE		DNA polymerase III subunit alpha	172	172	1	11	3011				3197	3197	3197		1	1	1	1	1	1	1	1	1	1	1	1	1	1	1	1	1	1	1	1	1	1	1	1	1	1	1	1	1	1	1	1	1	1	1
msrC		Free methionine-R-sulfoxide reductase	172	172	1	11	2884				464	464	464		1	1	1	1	1	1	1	1	1	1	1	1	1	1	1	1	1	1	1	1	1	1	1	1	1	1	1	1	1	1	1	1	1	1	1
group_1162		hypothetical protein	172	172	1	11	2881				446	446	446		1	1	1	1	1	1	1	1	1	1	1	1	1	1	1	1	1	1	1	1	1	1	1	1	1	1	1	1	1	1	1	1	1	1	1
group_1165		hypothetical protein	172	172	1	11	2858				3824	3824	3824		1	1	1	1	1	1	1	1	1	1	1	1	1	1	1	1	1	1	1	1	1	1	1	1	1	1	1	1	1	1	1	1	1	1	1
group_1166		hypothetical protein	172	172	1	11	2857				596	638	602		1	1	1	1	1	1	1	1	1	1	1	1	1	1	1	1	1	1	1	1	1	1	1	1	1	1	1	1	1	1	1	1	1	1	1
rsuA		Ribosomal small subunit pseudouridine synthase A	172	172	1	11	2846				695	695	695		1	1	1	1	1	1	1	1	1	1	1	1	1	1	1	1	1	1	1	1	1	1	1	1	1	1	1	1	1	1	1	1	1	1	1
rsmH_1		hypothetical protein	172	172	1	11	2834				551	563	562		1	1	1	1	1	1	1	1	1	1	1	1	1	1	1	1	1	1	1	1	1	1	1	1	1	1	1	1	1	1	1	1	1	1	1
group_1180		hypothetical protein	172	172	1	11	2696				1124	1124	1124		1	1	1	1	1	1	1	1	1	1	1	1	1	1	1	1	1	1	1	1	1	1	1	1	1	1	1	1	1	1	1	1	1	1	1
hemY		Protoporphyrinogen oxidase	172	172	1	11	2712				1400	1400	1400		1	1	1	1	1	1	1	1	1	1	1	1	1	1	1	1	1	1	1	1	1	1	1	1	1	1	1	1	1	1	1	1	1	1	1
group_1188		hypothetical protein	172	172	1	11	1468				1073	1079	1078		1	1	1	1	1	1	1	1	1	1	1	1	1	1	1	1	1	1	1	1	1	1	1	1	1	1	1	1	1	1	1	1	1	1	1
leuA_2		2-isopropylmalate synthase	172	172	1	11	1456				560	1529	1523		1	1	1	1	1	1	1	1	1	1	1	1	1	1	1	1	1	1	1	1	1	1	1	1	1	1	1	1	1	1	1	1	1	1	1
ndhB		NAD(P)H-quinone oxidoreductase subunit 2, chloroplastic	172	172	1	11	4346				1484	1484	1484		1	1	1	1	1	1	1	1	1	1	1	1	1	1	1	1	1	1	1	1	1	1	1	1	1	1	1	1	1	1	1	1	1	1	1
metN		Methionine import ATP-binding protein MetN	172	172	1	11	4336				1025	1025	1025		1	1	1	1	1	1	1	1	1	1	1	1	1	1	1	1	1	1	1	1	1	1	1	1	1	1	1	1	1	1	1	1	1	1	1
group_1196		hypothetical protein	172	172	1	11	4331				395	395	395		1	1	1	1	1	1	1	1	1	1	1	1	1	1	1	1	1	1	1	1	1	1	1	1	1	1	1	1	1	1	1	1	1	1	1
group_1197		hypothetical protein	172	172	1	11	4330				485	497	486		1	1	1	1	1	1	1	1	1	1	1	1	1	1	1	1	1	1	1	1	1	1	1	1	1	1	1	1	1	1	1	1	1	1	1
hisC_3		Histidinol-phosphate aminotransferase	172	172	1	11	2022				1286	1286	1286		1	1	1	1	1	1	1	1	1	1	1	1	1	1	1	1	1	1	1	1	1	1	1	1	1	1	1	1	1	1	1	1	1	1	1
group_1213		hypothetical protein	172	172	1	12	28				1193	1193	1193		1	1	1	1	1	1	1	1	1	1	1	1	1	1	1	1	1	1	1	1	1	1	1	1	1	1	1	1	1	1	1	1	1	1	1
mfd		Transcription-repair-coupling factor	172	172	1	12	30				1751	3506	3485		1	1	1	1	1	1	1	1	1	1	1	1	1	1	1	1	1	1	1	1	1	1	1	1	1	1	1	1	1	1	1	1	1	1	1
ydjM		Inner membrane protein YdjM	172	172	1	11	44				332	515	492		1	1	1	1	1	1	1	1	1	1	1	1	1	1	1	1	1	1	1	1	1	1	1	1	1	1	1	1	1	1	1	1	1	1	1
group_1223		hypothetical protein	172	172	1	11	2803				770	770	770		1	1	1	1	1	1	1	1	1	1	1	1	1	1	1	1	1	1	1	1	1	1	1	1	1	1	1	1	1	1	1	1	1	1	1
group_1229	mhqA_3	Putative ring-cleaving dioxygenase MhqA	172	172	1	11	3352				809	809	809		1	1	1	1	1	1	1	1	1	1	1	1	1	1	1	1	1	1	1	1	1	1	1	1	1	1	1	1	1	1	1	1	1	1	1
araB		Ribulokinase	172	172	1	11	1025				290	1640	1625		1	1	1	1	1	1	1	1	1	1	1	1	1	1	1	1	1	1	1	1	1	1	1	1	1	1	1	1	1	1	1	1	1	1	1
gabR		HTH-type transcriptional regulatory protein GabR	172	172	1	11	991				1382	1382	1382		1	1	1	1	1	1	1	1	1	1	1	1	1	1	1	1	1	1	1	1	1	1	1	1	1	1	1	1	1	1	1	1	1	1	1
pdxT		Pyridoxal 5'-phosphate synthase subunit PdxT	172	172	1	11	993				560	590	562		1	1	1	1	1	1	1	1	1	1	1	1	1	1	1	1	1	1	1	1	1	1	1	1	1	1	1	1	1	1	1	1	1	1	1
secE		Protein translocase subunit SecE	172	172	1	11	1008				182	182	182		1	1	1	1	1	1	1	1	1	1	1	1	1	1	1	1	1	1	1	1	1	1	1	1	1	1	1	1	1	1	1	1	1	1	1
dck		Deoxyadenosine/deoxycytidine kinase	172	177	1.03	11	1029				662	662	662		1	1	1	1	1	1	1	1	1	1	1	1	1	1	1	1	1	1	1	1	1	1	1	1	1	1	1	1	1	1	1	1	1	1	1
azo1		FMN-dependent NADPH-azoreductase	172	177	1.03	11	1037				566	566	566		1	1	1	1	1	1	1	1	1	1	1	1	1	1	1	1	1	1	1	1	1	1	1	1	1	1	1	1	1	1	1	1	1	1	1
bshB2		putative N-acetyl-alpha-D-glucosaminyl L-malate deacetylase 2	172	177	1.03	11	1069				665	665	665		1	1	1	1	1	1	1	1	1	1	1	1	1	1	1	1	1	1	1	1	1	1	1	1	1	1	1	1	1	1	1	1	1	1	1
yojF		putative protein YojF	172	177	1.03	11	1072				362	362	362		1	1	1	1	1	1	1	1	1	1	1	1	1	1	1	1	1	1	1	1	1	1	1	1	1	1	1	1	1	1	1	1	1	1	1
group_136		hypothetical protein	172	172	1	11	1486				1064	1259	1221		1	1	1	1	1	1	1	1	1	1	1	1	1	1	1	1	1	1	1	1	1	1	1	1	1	1	1	1	1	1	1	1	1	1	1
ywqN		Putative NAD(P)H-dependent FMN-containing oxidoreductase YwqN	172	172	1	11	1193				536	536	536		1	1	1	1	1	1	1	1	1	1	1	1	1	1	1	1	1	1	1	1	1	1	1	1	1	1	1	1	1	1	1	1	1	1	1
group_1368		putative ABC transporter permease protein	172	172	1	11	1202				950	986	985		1	1	1	1	1	1	1	1	1	1	1	1	1	1	1	1	1	1	1	1	1	1	1	1	1	1	1	1	1	1	1	1	1	1	1
dhaK		PTS-dependent dihydroxyacetone kinase, dihydroxyacetone-binding subunit DhaK	172	172	1	11	1266				968	968	968		1	1	1	1	1	1	1	1	1	1	1	1	1	1	1	1	1	1	1	1	1	1	1	1	1	1	1	1	1	1	1	1	1	1	1
dhaM		PTS-dependent dihydroxyacetone kinase, phosphotransferase subunit DhaM	172	172	1	11	1268				362	362	362		1	1	1	1	1	1	1	1	1	1	1	1	1	1	1	1	1	1	1	1	1	1	1	1	1	1	1	1	1	1	1	1	1	1	1
aes		Acetyl esterase	172	172	1	11	1271				1043	1043	1043		1	1	1	1	1	1	1	1	1	1	1	1	1	1	1	1	1	1	1	1	1	1	1	1	1	1	1	1	1	1	1	1	1	1	1
group_1382		hypothetical protein	172	172	1	11	1272				428	428	428		1	1	1	1	1	1	1	1	1	1	1	1	1	1	1	1	1	1	1	1	1	1	1	1	1	1	1	1	1	1	1	1	1	1	1
setC		Sugar efflux transporter C	172	172	1	11	1325				1214	1292	1278		1	1	1	1	1	1	1	1	1	1	1	1	1	1	1	1	1	1	1	1	1	1	1	1	1	1	1	1	1	1	1	1	1	1	1
group_1389		hypothetical protein	172	172	1	11	1326				467	488	485		1	1	1	1	1	1	1	1	1	1	1	1	1	1	1	1	1	1	1	1	1	1	1	1	1	1	1	1	1	1	1	1	1	1	1
group_1395		hypothetical protein	172	172	1	11	1342				287	287	287		1	1	1	1	1	1	1	1	1	1	1	1	1	1	1	1	1	1	1	1	1	1	1	1	1	1	1	1	1	1	1	1	1	1	1
group_1399		hypothetical protein	172	172	1	11	1350				452	464	455		1	1	1	1	1	1	1	1	1	1	1	1	1	1	1	1	1	1	1	1	1	1	1	1	1	1	1	1	1	1	1	1	1	1	1
group_1401		hypothetical protein	172	172	1	11	1359				245	1349	1329		1	1	1	1	1	1	1	1	1	1	1	1	1	1	1	1	1	1	1	1	1	1	1	1	1	1	1	1	1	1	1	1	1	1	1
csbB		Putative glycosyltransferase CsbB	172	172	1	11	1361				566	983	980		1	1	1	1	1	1	1	1	1	1	1	1	1	1	1	1	1	1	1	1	1	1	1	1	1	1	1	1	1	1	1	1	1	1	1
yclQ		Petrobactin-binding protein YclQ	172	172	1	11	1394				1028	1028	1028		1	1	1	1	1	1	1	1	1	1	1	1	1	1	1	1	1	1	1	1	1	1	1	1	1	1	1	1	1	1	1	1	1	1	1
group_1404		hypothetical protein	172	172	1	11	1397				518	518	518		1	1	1	1	1	1	1	1	1	1	1	1	1	1	1	1	1	1	1	1	1	1	1	1	1	1	1	1	1	1	1	1	1	1	1
group_1405		hypothetical protein	172	172	1	11	1398				776	878	877		1	1	1	1	1	1	1	1	1	1	1	1	1	1	1	1	1	1	1	1	1	1	1	1	1	1	1	1	1	1	1	1	1	1	1
group_1406		putative autolysin LDP	172	172	1	11	1413				839	839	839		1	1	1	1	1	1	1	1	1	1	1	1	1	1	1	1	1	1	1	1	1	1	1	1	1	1	1	1	1	1	1	1	1	1	1
dapH_2		2,3,4,5-tetrahydropyridine-2,6-dicarboxylate N-acetyltransferase	172	172	1	11	1420				485	485	485		1	1	1	1	1	1	1	1	1	1	1	1	1	1	1	1	1	1	1	1	1	1	1	1	1	1	1	1	1	1	1	1	1	1	1
smpB		SsrA-binding protein	172	172	1	11	4249				464	464	464		1	1	1	1	1	1	1	1	1	1	1	1	1	1	1	1	1	1	1	1	1	1	1	1	1	1	1	1	1	1	1	1	1	1	1
group_1409		hypothetical protein	172	172	1	11	4238				452	728	726		1	1	1	1	1	1	1	1	1	1	1	1	1	1	1	1	1	1	1	1	1	1	1	1	1	1	1	1	1	1	1	1	1	1	1
group_1410		hypothetical protein	172	172	1	11	4235				530	530	530		1	1	1	1	1	1	1	1	1	1	1	1	1	1	1	1	1	1	1	1	1	1	1	1	1	1	1	1	1	1	1	1	1	1	1
nuc		Thermonuclease	172	172	1	11	4224				686	686	686		1	1	1	1	1	1	1	1	1	1	1	1	1	1	1	1	1	1	1	1	1	1	1	1	1	1	1	1	1	1	1	1	1	1	1
group_1413		hypothetical protein	172	172	1	11	4220				569	569	569		1	1	1	1	1	1	1	1	1	1	1	1	1	1	1	1	1	1	1	1	1	1	1	1	1	1	1	1	1	1	1	1	1	1	1
group_1414		Organic hydroperoxide resistance protein-like protein	172	172	1	11	4212				422	422	422		1	1	1	1	1	1	1	1	1	1	1	1	1	1	1	1	1	1	1	1	1	1	1	1	1	1	1	1	1	1	1	1	1	1	1
aroD		3-dehydroquinate dehydratase	172	172	1	11	4211				716	716	716		1	1	1	1	1	1	1	1	1	1	1	1	1	1	1	1	1	1	1	1	1	1	1	1	1	1	1	1	1	1	1	1	1	1	1
ydbP		Thioredoxin-like protein YdbP	172	172	1	11	4209				320	320	320		1	1	1	1	1	1	1	1	1	1	1	1	1	1	1	1	1	1	1	1	1	1	1	1	1	1	1	1	1	1	1	1	1	1	1
gcvH		Glycine cleavage system H protein	172	172	1	11	4207				380	380	380		1	1	1	1	1	1	1	1	1	1	1	1	1	1	1	1	1	1	1	1	1	1	1	1	1	1	1	1	1	1	1	1	1	1	1
rnmV_1		Ribonuclease M5	172	172	1	11	4201				332	389	372		1	1	1	1	1	1	1	1	1	1	1	1	1	1	1	1	1	1	1	1	1	1	1	1	1	1	1	1	1	1	1	1	1	1	1
group_1419		hypothetical protein	172	172	1	11	4200				296	296	296		1	1	1	1	1	1	1	1	1	1	1	1	1	1	1	1	1	1	1	1	1	1	1	1	1	1	1	1	1	1	1	1	1	1	1
metQ_2		Methionine-binding lipoprotein MetQ	172	172	1	11	4197				821	821	821		1	1	1	1	1	1	1	1	1	1	1	1	1	1	1	1	1	1	1	1	1	1	1	1	1	1	1	1	1	1	1	1	1	1	1
csd		putative cysteine desulfurase	172	172	1	11	4188				554	1241	1237		1	1	1	1	1	1	1	1	1	1	1	1	1	1	1	1	1	1	1	1	1	1	1	1	1	1	1	1	1	1	1	1	1	1	1
pnoA		Nitronate monooxygenase	172	172	1	11	4177				1067	1067	1067		1	1	1	1	1	1	1	1	1	1	1	1	1	1	1	1	1	1	1	1	1	1	1	1	1	1	1	1	1	1	1	1	1	1	1
group_1426		hypothetical protein	172	172	1	11	4171				266	299	268		1	1	1	1	1	1	1	1	1	1	1	1	1	1	1	1	1	1	1	1	1	1	1	1	1	1	1	1	1	1	1	1	1	1	1
group_1427		Protein	172	172	1	11	4157				311	359	358		1	1	1	1	1	1	1	1	1	1	1	1	1	1	1	1	1	1	1	1	1	1	1	1	1	1	1	1	1	1	1	1	1	1	1
spsB_2		Signal peptidase IB	172	172	1	11	4132				524	524	524		1	1	1	1	1	1	1	1	1	1	1	1	1	1	1	1	1	1	1	1	1	1	1	1	1	1	1	1	1	1	1	1	1	1	1
spsB_1		Signal peptidase IB	172	172	1	11	4131				575	575	575		1	1	1	1	1	1	1	1	1	1	1	1	1	1	1	1	1	1	1	1	1	1	1	1	1	1	1	1	1	1	1	1	1	1	1
addB		ATP-dependent helicase/deoxyribonuclease subunit B	172	172	1	11	4130				3473	3476	3473		1	1	1	1	1	1	1	1	1	1	1	1	1	1	1	1	1	1	1	1	1	1	1	1	1	1	1	1	1	1	1	1	1	1	1
map_2		Protein map	172	172	1	11	4115				434	434	434		1	1	1	1	1	1	1	1	1	1	1	1	1	1	1	1	1	1	1	1	1	1	1	1	1	1	1	1	1	1	1	1	1	1	1
group_1432		hypothetical protein	172	172	1	11	4113				185	185	185		1	1	1	1	1	1	1	1	1	1	1	1	1	1	1	1	1	1	1	1	1	1	1	1	1	1	1	1	1	1	1	1	1	1	1
group_1433		hypothetical protein	172	172	1	11	4110				371	371	371		1	1	1	1	1	1	1	1	1	1	1	1	1	1	1	1	1	1	1	1	1	1	1	1	1	1	1	1	1	1	1	1	1	1	1
yjbI		Group 2 truncated hemoglobin YjbI	172	172	1	11	4089				365	365	365		1	1	1	1	1	1	1	1	1	1	1	1	1	1	1	1	1	1	1	1	1	1	1	1	1	1	1	1	1	1	1	1	1	1	1
group_1438		hypothetical protein	172	172	1	11	4071				251	251	251		1	1	1	1	1	1	1	1	1	1	1	1	1	1	1	1	1	1	1	1	1	1	1	1	1	1	1	1	1	1	1	1	1	1	1
group_1439		hypothetical protein	172	172	1	11	4061				473	602	600		1	1	1	1	1	1	1	1	1	1	1	1	1	1	1	1	1	1	1	1	1	1	1	1	1	1	1	1	1	1	1	1	1	1	1
group_1440		putative ABC transporter ATP-binding protein	172	172	1	11	4058				641	641	641		1	1	1	1	1	1	1	1	1	1	1	1	1	1	1	1	1	1	1	1	1	1	1	1	1	1	1	1	1	1	1	1	1	1	1
yfmC_2		Fe(3+)-citrate-binding protein YfmC	172	172	1	11	4055				959	959	959		1	1	1	1	1	1	1	1	1	1	1	1	1	1	1	1	1	1	1	1	1	1	1	1	1	1	1	1	1	1	1	1	1	1	1
group_1442		hypothetical protein	172	172	1	11	4053				215	215	215		1	1	1	1	1	1	1	1	1	1	1	1	1	1	1	1	1	1	1	1	1	1	1	1	1	1	1	1	1	1	1	1	1	1	1
group_1443		hypothetical protein	172	172	1	11	4052				551	551	551		1	1	1	1	1	1	1	1	1	1	1	1	1	1	1	1	1	1	1	1	1	1	1	1	1	1	1	1	1	1	1	1	1	1	1
sspB		Staphopain B	172	172	1	11	4045				1181	1181	1181		1	1	1	1	1	1	1	1	1	1	1	1	1	1	1	1	1	1	1	1	1	1	1	1	1	1	1	1	1	1	1	1	1	1	1
atl_3		Bifunctional autolysin	172	172	1	11	4038				3746	3773	3752		1	1	1	1	1	1	1	1	1	1	1	1	1	1	1	1	1	1	1	1	1	1	1	1	1	1	1	1	1	1	1	1	1	1	1
purC		Phosphoribosylaminoimidazole-succinocarboxamide synthase	172	172	1	11	4024				704	704	704		1	1	1	1	1	1	1	1	1	1	1	1	1	1	1	1	1	1	1	1	1	1	1	1	1	1	1	1	1	1	1	1	1	1	1
purL		Phosphoribosylformylglycinamidine synthase subunit PurL	172	172	1	11	4021				2189	2189	2189		1	1	1	1	1	1	1	1	1	1	1	1	1	1	1	1	1	1	1	1	1	1	1	1	1	1	1	1	1	1	1	1	1	1	1
purN		Phosphoribosylglycinamide formyltransferase	172	172	1	11	4018				566	566	566		1	1	1	1	1	1	1	1	1	1	1	1	1	1	1	1	1	1	1	1	1	1	1	1	1	1	1	1	1	1	1	1	1	1	1
purD		Phosphoribosylamine--glycine ligase	172	172	1	11	4016				1247	1247	1247		1	1	1	1	1	1	1	1	1	1	1	1	1	1	1	1	1	1	1	1	1	1	1	1	1	1	1	1	1	1	1	1	1	1	1
ecfT_2		Energy-coupling factor transporter transmembrane protein EcfT	172	172	1	11	4015				806	839	809		1	1	1	1	1	1	1	1	1	1	1	1	1	1	1	1	1	1	1	1	1	1	1	1	1	1	1	1	1	1	1	1	1	1	1
group_1451		hypothetical protein	172	172	1	11	4010				134	134	134		1	1	1	1	1	1	1	1	1	1	1	1	1	1	1	1	1	1	1	1	1	1	1	1	1	1	1	1	1	1	1	1	1	1	1
group_1452		hypothetical protein	172	172	1	11	4007				542	542	542		1	1	1	1	1	1	1	1	1	1	1	1	1	1	1	1	1	1	1	1	1	1	1	1	1	1	1	1	1	1	1	1	1	1	1
group_1453		hypothetical protein	172	172	1	11	3997				626	626	626		1	1	1	1	1	1	1	1	1	1	1	1	1	1	1	1	1	1	1	1	1	1	1	1	1	1	1	1	1	1	1	1	1	1	1
group_1454		hypothetical protein	172	172	1	11	3986				1019	1019	1019		1	1	1	1	1	1	1	1	1	1	1	1	1	1	1	1	1	1	1	1	1	1	1	1	1	1	1	1	1	1	1	1	1	1	1
ctaA		Heme A synthase	172	172	1	11	3974				911	1070	1052		1	1	1	1	1	1	1	1	1	1	1	1	1	1	1	1	1	1	1	1	1	1	1	1	1	1	1	1	1	1	1	1	1	1	1
group_1457		hypothetical protein	172	172	1	11	3970				305	434	425		1	1	1	1	1	1	1	1	1	1	1	1	1	1	1	1	1	1	1	1	1	1	1	1	1	1	1	1	1	1	1	1	1	1	1
tmcAL		tRNA(Met) cytidine acetate ligase	172	172	1	11	3964				1139	1139	1139		1	1	1	1	1	1	1	1	1	1	1	1	1	1	1	1	1	1	1	1	1	1	1	1	1	1	1	1	1	1	1	1	1	1	1
isdC		Iron-regulated surface determinant protein C	172	172	1	11	3953				683	683	683		1	1	1	1	1	1	1	1	1	1	1	1	1	1	1	1	1	1	1	1	1	1	1	1	1	1	1	1	1	1	1	1	1	1	1
group_1460		hypothetical protein	172	172	1	11	3952				1076	1076	1076		1	1	1	1	1	1	1	1	1	1	1	1	1	1	1	1	1	1	1	1	1	1	1	1	1	1	1	1	1	1	1	1	1	1	1
srtB		Sortase B	172	172	1	11	3949				734	734	734		1	1	1	1	1	1	1	1	1	1	1	1	1	1	1	1	1	1	1	1	1	1	1	1	1	1	1	1	1	1	1	1	1	1	1
zapA		Cell division protein ZapA	172	172	1	11	3943				266	266	266		1	1	1	1	1	1	1	1	1	1	1	1	1	1	1	1	1	1	1	1	1	1	1	1	1	1	1	1	1	1	1	1	1	1	1
group_1463		dITP/XTP pyrophosphatase	172	172	1	11	3933				587	587	587		1	1	1	1	1	1	1	1	1	1	1	1	1	1	1	1	1	1	1	1	1	1	1	1	1	1	1	1	1	1	1	1	1	1	1
group_1464		hypothetical protein	172	172	1	11	3928				506	506	506		1	1	1	1	1	1	1	1	1	1	1	1	1	1	1	1	1	1	1	1	1	1	1	1	1	1	1	1	1	1	1	1	1	1	1
argF		Ornithine carbamoyltransferase	172	172	1	11	3898				254	1001	996		1	1	1	1	1	1	1	1	1	1	1	1	1	1	1	1	1	1	1	1	1	1	1	1	1	1	1	1	1	1	1	1	1	1	1
group_1467		hypothetical protein	172	172	1	11	3891				227	227	227		1	1	1	1	1	1	1	1	1	1	1	1	1	1	1	1	1	1	1	1	1	1	1	1	1	1	1	1	1	1	1	1	1	1	1
group_1468		hypothetical protein	172	172	1	11	3890				947	947	947		1	1	1	1	1	1	1	1	1	1	1	1	1	1	1	1	1	1	1	1	1	1	1	1	1	1	1	1	1	1	1	1	1	1	1
divIB		Cell division protein DivIB	172	172	1	11	3877				1319	1319	1319		1	1	1	1	1	1	1	1	1	1	1	1	1	1	1	1	1	1	1	1	1	1	1	1	1	1	1	1	1	1	1	1	1	1	1
divIVA		hypothetical protein	172	172	1	11	3869				596	617	614		1	1	1	1	1	1	1	1	1	1	1	1	1	1	1	1	1	1	1	1	1	1	1	1	1	1	1	1	1	1	1	1	1	1	1
def1		Peptide deformylase 1	172	172	1	11	3728				488	488	488		1	1	1	1	1	1	1	1	1	1	1	1	1	1	1	1	1	1	1	1	1	1	1	1	1	1	1	1	1	1	1	1	1	1	1
fapR		Transcription factor FapR	172	172	1	11	3715				557	572	564		1	1	1	1	1	1	1	1	1	1	1	1	1	1	1	1	1	1	1	1	1	1	1	1	1	1	1	1	1	1	1	1	1	1	1
rnc		Ribonuclease 3	172	172	1	11	3710				569	731	729		1	1	1	1	1	1	1	1	1	1	1	1	1	1	1	1	1	1	1	1	1	1	1	1	1	1	1	1	1	1	1	1	1	1	1
group_1475		hypothetical protein	172	172	1	11	3499				293	293	293		1	1	1	1	1	1	1	1	1	1	1	1	1	1	1	1	1	1	1	1	1	1	1	1	1	1	1	1	1	1	1	1	1	1	1
miaA		tRNA dimethylallyltransferase	172	172	1	11	3487				935	935	935		1	1	1	1	1	1	1	1	1	1	1	1	1	1	1	1	1	1	1	1	1	1	1	1	1	1	1	1	1	1	1	1	1	1	1
thrB		Homoserine kinase	172	172	1	11	3435				914	914	914		1	1	1	1	1	1	1	1	1	1	1	1	1	1	1	1	1	1	1	1	1	1	1	1	1	1	1	1	1	1	1	1	1	1	1
group_1487		Putative phosphatase	172	172	1	11	3434				803	803	803		1	1	1	1	1	1	1	1	1	1	1	1	1	1	1	1	1	1	1	1	1	1	1	1	1	1	1	1	1	1	1	1	1	1	1
rpmG2_2		50S ribosomal protein L33 2	172	172	1	11	3430				149	149	149		1	1	1	1	1	1	1	1	1	1	1	1	1	1	1	1	1	1	1	1	1	1	1	1	1	1	1	1	1	1	1	1	1	1	1
group_1491		hypothetical protein	172	172	1	11	3427				863	863	863		1	1	1	1	1	1	1	1	1	1	1	1	1	1	1	1	1	1	1	1	1	1	1	1	1	1	1	1	1	1	1	1	1	1	1
mscL		Large-conductance mechanosensitive channel	172	172	1	11	3417				362	362	362		1	1	1	1	1	1	1	1	1	1	1	1	1	1	1	1	1	1	1	1	1	1	1	1	1	1	1	1	1	1	1	1	1	1	1
group_1495		putative protein	172	172	1	11	3413				296	296	296		1	1	1	1	1	1	1	1	1	1	1	1	1	1	1	1	1	1	1	1	1	1	1	1	1	1	1	1	1	1	1	1	1	1	1
phoU		Phosphate-specific transport system accessory protein PhoU	172	172	1	11	3377				641	641	641		1	1	1	1	1	1	1	1	1	1	1	1	1	1	1	1	1	1	1	1	1	1	1	1	1	1	1	1	1	1	1	1	1	1	1
pstB3		Phosphate import ATP-binding protein PstB 3	172	172	1	11	3376				851	851	851		1	1	1	1	1	1	1	1	1	1	1	1	1	1	1	1	1	1	1	1	1	1	1	1	1	1	1	1	1	1	1	1	1	1	1
dapB		4-hydroxy-tetrahydrodipicolinate reductase	172	172	1	11	3367				722	722	722		1	1	1	1	1	1	1	1	1	1	1	1	1	1	1	1	1	1	1	1	1	1	1	1	1	1	1	1	1	1	1	1	1	1	1
scmP_1		N-acetylcysteine deacetylase	172	172	1	11	4814				1178	1178	1178		1	1	1	1	1	1	1	1	1	1	1	1	1	1	1	1	1	1	1	1	1	1	1	1	1	1	1	1	1	1	1	1	1	1	1
yfhA		putative siderophore transport system permease protein YfhA	172	172	1	11	4804				998	998	998		1	1	1	1	1	1	1	1	1	1	1	1	1	1	1	1	1	1	1	1	1	1	1	1	1	1	1	1	1	1	1	1	1	1	1
sbnE		L-2,3-diaminopropanoate--citrate ligase	172	172	1	11	4796				1736	1736	1736		1	1	1	1	1	1	1	1	1	1	1	1	1	1	1	1	1	1	1	1	1	1	1	1	1	1	1	1	1	1	1	1	1	1	1
sbnH		2-[(L-alanin-3-ylcarbamoyl)methyl]-2-hydroxybutanedioate decarboxylase	172	172	1	11	4793				1202	1202	1202		1	1	1	1	1	1	1	1	1	1	1	1	1	1	1	1	1	1	1	1	1	1	1	1	1	1	1	1	1	1	1	1	1	1	1
wbnH		O-antigen biosynthesis glycosyltransferase WbnH	172	172	1	11	4784				1166	1166	1166		1	1	1	1	1	1	1	1	1	1	1	1	1	1	1	1	1	1	1	1	1	1	1	1	1	1	1	1	1	1	1	1	1	1	1
wbjC		UDP-2-acetamido-2,6-beta-L-arabino-hexul-4-ose reductase	172	172	1	11	4749				1109	1109	1109		1	1	1	1	1	1	1	1	1	1	1	1	1	1	1	1	1	1	1	1	1	1	1	1	1	1	1	1	1	1	1	1	1	1	1
yagU		Inner membrane protein YagU	172	172	1	11	4702				494	494	494		1	1	1	1	1	1	1	1	1	1	1	1	1	1	1	1	1	1	1	1	1	1	1	1	1	1	1	1	1	1	1	1	1	1	1
argC		N-acetyl-gamma-glutamyl-phosphate reductase	172	172	1	11	4698				1034	1034	1034		1	1	1	1	1	1	1	1	1	1	1	1	1	1	1	1	1	1	1	1	1	1	1	1	1	1	1	1	1	1	1	1	1	1	1
ipdC		Indole-3-pyruvate decarboxylase	172	172	1	11	4692				1640	1640	1640		1	1	1	1	1	1	1	1	1	1	1	1	1	1	1	1	1	1	1	1	1	1	1	1	1	1	1	1	1	1	1	1	1	1	1
ptsG_3		PTS system glucose-specific EIICBA component	172	172	1	11	4690				2045	2045	2045		1	1	1	1	1	1	1	1	1	1	1	1	1	1	1	1	1	1	1	1	1	1	1	1	1	1	1	1	1	1	1	1	1	1	1
murQ		N-acetylmuramic acid 6-phosphate etherase	172	172	1	11	4687				710	896	840		1	1	1	1	1	1	1	1	1	1	1	1	1	1	1	1	1	1	1	1	1	1	1	1	1	1	1	1	1	1	1	1	1	1	1
group_1536		hypothetical protein	172	172	1	11	4671				1262	1433	1414		1	1	1	1	1	1	1	1	1	1	1	1	1	1	1	1	1	1	1	1	1	1	1	1	1	1	1	1	1	1	1	1	1	1	1
group_1537		hypothetical protein	172	172	1	11	4670				1163	1163	1163		1	1	1	1	1	1	1	1	1	1	1	1	1	1	1	1	1	1	1	1	1	1	1	1	1	1	1	1	1	1	1	1	1	1	1
group_1538		hypothetical protein	172	172	1	11	4665				578	578	578		1	1	1	1	1	1	1	1	1	1	1	1	1	1	1	1	1	1	1	1	1	1	1	1	1	1	1	1	1	1	1	1	1	1	1
gfo		Glucose--fructose oxidoreductase	172	172	1	11	4660				1076	1076	1076		1	1	1	1	1	1	1	1	1	1	1	1	1	1	1	1	1	1	1	1	1	1	1	1	1	1	1	1	1	1	1	1	1	1	1
group_1541		hypothetical protein	172	172	1	11	4639				1229	1229	1229		1	1	1	1	1	1	1	1	1	1	1	1	1	1	1	1	1	1	1	1	1	1	1	1	1	1	1	1	1	1	1	1	1	1	1
hmp		Flavohemoprotein	172	172	1	11	4635				1145	1145	1145		1	1	1	1	1	1	1	1	1	1	1	1	1	1	1	1	1	1	1	1	1	1	1	1	1	1	1	1	1	1	1	1	1	1	1
gatA_1		PTS system galactitol-specific EIIA component	172	172	1	11	4629				467	467	467		1	1	1	1	1	1	1	1	1	1	1	1	1	1	1	1	1	1	1	1	1	1	1	1	1	1	1	1	1	1	1	1	1	1	1
tarK		Teichoic acid ribitol-phosphate polymerase TarK	172	172	1	11	4621				1694	1694	1694		1	1	1	1	1	1	1	1	1	1	1	1	1	1	1	1	1	1	1	1	1	1	1	1	1	1	1	1	1	1	1	1	1	1	1
rbsD		D-ribose pyranase	172	172	1	11	4600				278	404	390		1	1	1	1	1	1	1	1	1	1	1	1	1	1	1	1	1	1	1	1	1	1	1	1	1	1	1	1	1	1	1	1	1	1	1
degA		HTH-type transcriptional regulator DegA	172	172	1	11	4598				998	998	998		1	1	1	1	1	1	1	1	1	1	1	1	1	1	1	1	1	1	1	1	1	1	1	1	1	1	1	1	1	1	1	1	1	1	1
norB_2		Quinolone resistance protein NorB	172	172	1	11	4596				1376	1376	1376		1	1	1	1	1	1	1	1	1	1	1	1	1	1	1	1	1	1	1	1	1	1	1	1	1	1	1	1	1	1	1	1	1	1	1
yxeI		putative protein YxeI	172	172	1	11	4595				992	992	992		1	1	1	1	1	1	1	1	1	1	1	1	1	1	1	1	1	1	1	1	1	1	1	1	1	1	1	1	1	1	1	1	1	1	1
group_1556		hypothetical protein	172	172	1	11	4536				326	374	368		1	1	1	1	1	1	1	1	1	1	1	1	1	1	1	1	1	1	1	1	1	1	1	1	1	1	1	1	1	1	1	1	1	1	1
hel		Lipoprotein E	172	172	1	11	4527				890	890	890		1	1	1	1	1	1	1	1	1	1	1	1	1	1	1	1	1	1	1	1	1	1	1	1	1	1	1	1	1	1	1	1	1	1	1
group_1558		putative ABC transporter permease	172	172	1	11	4526				1049	1049	1049		1	1	1	1	1	1	1	1	1	1	1	1	1	1	1	1	1	1	1	1	1	1	1	1	1	1	1	1	1	1	1	1	1	1	1
hrtA_1		Putative hemin import ATP-binding protein HrtA	172	172	1	11	4525				677	677	677		1	1	1	1	1	1	1	1	1	1	1	1	1	1	1	1	1	1	1	1	1	1	1	1	1	1	1	1	1	1	1	1	1	1	1
group_1560		hypothetical protein	172	172	1	11	4524				998	1031	1030		1	1	1	1	1	1	1	1	1	1	1	1	1	1	1	1	1	1	1	1	1	1	1	1	1	1	1	1	1	1	1	1	1	1	1
psuG		Pseudouridine-5'-phosphate glycosidase	172	172	1	11	4522				923	923	923		1	1	1	1	1	1	1	1	1	1	1	1	1	1	1	1	1	1	1	1	1	1	1	1	1	1	1	1	1	1	1	1	1	1	1
group_1562		Glycine cleavage system H-like protein	172	172	1	11	4498				332	332	332		1	1	1	1	1	1	1	1	1	1	1	1	1	1	1	1	1	1	1	1	1	1	1	1	1	1	1	1	1	1	1	1	1	1	1
mhqA_2		Putative ring-cleaving dioxygenase MhqA	172	172	1	11	4484				926	926	926		1	1	1	1	1	1	1	1	1	1	1	1	1	1	1	1	1	1	1	1	1	1	1	1	1	1	1	1	1	1	1	1	1	1	1
efeM		putative iron uptake system component EfeM	172	172	1	11	4477				854	854	854		1	1	1	1	1	1	1	1	1	1	1	1	1	1	1	1	1	1	1	1	1	1	1	1	1	1	1	1	1	1	1	1	1	1	1
group_1568		hypothetical protein	172	172	1	11	4470				203	203	203		1	1	1	1	1	1	1	1	1	1	1	1	1	1	1	1	1	1	1	1	1	1	1	1	1	1	1	1	1	1	1	1	1	1	1
group_1569		hypothetical protein	172	172	1	11	4466				1133	1133	1133		1	1	1	1	1	1	1	1	1	1	1	1	1	1	1	1	1	1	1	1	1	1	1	1	1	1	1	1	1	1	1	1	1	1	1
group_1570		hypothetical protein	172	172	1	11	4457				203	203	203		1	1	1	1	1	1	1	1	1	1	1	1	1	1	1	1	1	1	1	1	1	1	1	1	1	1	1	1	1	1	1	1	1	1	1
group_1571		hypothetical protein	172	172	1	11	4455				164	191	190		1	1	1	1	1	1	1	1	1	1	1	1	1	1	1	1	1	1	1	1	1	1	1	1	1	1	1	1	1	1	1	1	1	1	1
gpmA_2		2,3-bisphosphoglycerate-dependent phosphoglycerate mutase	172	172	1	11	4441				581	581	581		1	1	1	1	1	1	1	1	1	1	1	1	1	1	1	1	1	1	1	1	1	1	1	1	1	1	1	1	1	1	1	1	1	1	1
qorB		Quinone oxidoreductase 2	172	172	1	11	4405				845	845	845		1	1	1	1	1	1	1	1	1	1	1	1	1	1	1	1	1	1	1	1	1	1	1	1	1	1	1	1	1	1	1	1	1	1	1
fbp		Fructose-1,6-bisphosphatase class 3	172	172	1	11	5168				1964	1964	1964		1	1	1	1	1	1	1	1	1	1	1	1	1	1	1	1	1	1	1	1	1	1	1	1	1	1	1	1	1	1	1	1	1	1	1
ldhD_1		D-lactate dehydrogenase	172	172	1	11	5159				839	992	990		1	1	1	1	1	1	1	1	1	1	1	1	1	1	1	1	1	1	1	1	1	1	1	1	1	1	1	1	1	1	1	1	1	1	1
yicL		putative inner membrane transporter YicL	172	172	1	11	5148				923	962	957		1	1	1	1	1	1	1	1	1	1	1	1	1	1	1	1	1	1	1	1	1	1	1	1	1	1	1	1	1	1	1	1	1	1	1
group_1588		hypothetical protein	172	172	1	11	5138				431	431	431		1	1	1	1	1	1	1	1	1	1	1	1	1	1	1	1	1	1	1	1	1	1	1	1	1	1	1	1	1	1	1	1	1	1	1
rocA		1-pyrroline-5-carboxylate dehydrogenase	172	172	1	11	5123				311	1544	1536		1	1	1	1	1	1	1	1	1	1	1	1	1	1	1	1	1	1	1	1	1	1	1	1	1	1	1	1	1	1	1	1	1	1	1
ldhD_2		D-lactate dehydrogenase	172	172	1	11	5118				998	1028	1008		1	1	1	1	1	1	1	1	1	1	1	1	1	1	1	1	1	1	1	1	1	1	1	1	1	1	1	1	1	1	1	1	1	1	1
crtM		4,4'-diapophytoene synthase	172	172	1	11	5114				863	863	863		1	1	1	1	1	1	1	1	1	1	1	1	1	1	1	1	1	1	1	1	1	1	1	1	1	1	1	1	1	1	1	1	1	1	1
crtP		4,4'-diaponeurosporene oxygenase	172	172	1	11	5112				1493	1493	1493		1	1	1	1	1	1	1	1	1	1	1	1	1	1	1	1	1	1	1	1	1	1	1	1	1	1	1	1	1	1	1	1	1	1	1
group_1594		hypothetical protein	172	172	1	11	5105				1055	1055	1055		1	1	1	1	1	1	1	1	1	1	1	1	1	1	1	1	1	1	1	1	1	1	1	1	1	1	1	1	1	1	1	1	1	1	1
cocE		Cocaine esterase	172	172	1	11	5078				1682	1682	1682		1	1	1	1	1	1	1	1	1	1	1	1	1	1	1	1	1	1	1	1	1	1	1	1	1	1	1	1	1	1	1	1	1	1	1
opcR		HTH-type transcriptional repressor OpcR	172	172	1	11	5057				563	563	563		1	1	1	1	1	1	1	1	1	1	1	1	1	1	1	1	1	1	1	1	1	1	1	1	1	1	1	1	1	1	1	1	1	1	1
opuD_1		Glycine betaine transporter OpuD	172	172	1	11	5056				566	1622	1615		1	1	1	1	1	1	1	1	1	1	1	1	1	1	1	1	1	1	1	1	1	1	1	1	1	1	1	1	1	1	1	1	1	1	1
citN		Citrate transporter	172	172	1	11	5052				1370	1370	1370		1	1	1	1	1	1	1	1	1	1	1	1	1	1	1	1	1	1	1	1	1	1	1	1	1	1	1	1	1	1	1	1	1	1	1
graS_1		Sensor histidine kinase GraS	172	172	1	11	5043				887	887	887		1	1	1	1	1	1	1	1	1	1	1	1	1	1	1	1	1	1	1	1	1	1	1	1	1	1	1	1	1	1	1	1	1	1	1
phoB		Alkaline phosphatase 3	172	172	1	11	5040				1232	1424	1421		1	1	1	1	1	1	1	1	1	1	1	1	1	1	1	1	1	1	1	1	1	1	1	1	1	1	1	1	1	1	1	1	1	1	1
group_1601		putative protein.1	172	172	1	11	5039				104	104	104		1	1	1	1	1	1	1	1	1	1	1	1	1	1	1	1	1	1	1	1	1	1	1	1	1	1	1	1	1	1	1	1	1	1	1
arcC2		Carbamate kinase 2	172	172	1	11	5033				254	941	913		1	1	1	1	1	1	1	1	1	1	1	1	1	1	1	1	1	1	1	1	1	1	1	1	1	1	1	1	1	1	1	1	1	1	1
argR_2		Arginine repressor	172	172	1	11	5029				449	449	449		1	1	1	1	1	1	1	1	1	1	1	1	1	1	1	1	1	1	1	1	1	1	1	1	1	1	1	1	1	1	1	1	1	1	1
manP		PTS system mannose-specific EIIBCA component	172	172	1	11	5020				1952	1952	1952		1	1	1	1	1	1	1	1	1	1	1	1	1	1	1	1	1	1	1	1	1	1	1	1	1	1	1	1	1	1	1	1	1	1	1
secY_1		Protein translocase subunit SecY	172	172	1	11	5005				1211	1211	1211		1	1	1	1	1	1	1	1	1	1	1	1	1	1	1	1	1	1	1	1	1	1	1	1	1	1	1	1	1	1	1	1	1	1	1
group_1606		hypothetical protein	172	172	1	11	4989				359	359	359		1	1	1	1	1	1	1	1	1	1	1	1	1	1	1	1	1	1	1	1	1	1	1	1	1	1	1	1	1	1	1	1	1	1	1
hisF		Imidazole glycerol phosphate synthase subunit HisF	172	172	1	11	4968				737	758	757		1	1	1	1	1	1	1	1	1	1	1	1	1	1	1	1	1	1	1	1	1	1	1	1	1	1	1	1	1	1	1	1	1	1	1
hisD		Histidinol dehydrogenase	172	172	1	11	4963				1250	1250	1250		1	1	1	1	1	1	1	1	1	1	1	1	1	1	1	1	1	1	1	1	1	1	1	1	1	1	1	1	1	1	1	1	1	1	1
hisG		ATP phosphoribosyltransferase	172	172	1	11	4962				614	614	614		1	1	1	1	1	1	1	1	1	1	1	1	1	1	1	1	1	1	1	1	1	1	1	1	1	1	1	1	1	1	1	1	1	1	1
hisZ		ATP phosphoribosyltransferase regulatory subunit	172	172	1	11	4961				818	857	841		1	1	1	1	1	1	1	1	1	1	1	1	1	1	1	1	1	1	1	1	1	1	1	1	1	1	1	1	1	1	1	1	1	1	1
group_1614		hypothetical protein	172	172	1	11	4952				956	956	956		1	1	1	1	1	1	1	1	1	1	1	1	1	1	1	1	1	1	1	1	1	1	1	1	1	1	1	1	1	1	1	1	1	1	1
group_1615		hypothetical protein	172	172	1	11	4941				512	512	512		1	1	1	1	1	1	1	1	1	1	1	1	1	1	1	1	1	1	1	1	1	1	1	1	1	1	1	1	1	1	1	1	1	1	1
group_1617		hypothetical protein	172	172	1	11	4933				395	395	395		1	1	1	1	1	1	1	1	1	1	1	1	1	1	1	1	1	1	1	1	1	1	1	1	1	1	1	1	1	1	1	1	1	1	1
hutH		Histidine ammonia-lyase	172	172	1	11	4917				1514	1514	1514		1	1	1	1	1	1	1	1	1	1	1	1	1	1	1	1	1	1	1	1	1	1	1	1	1	1	1	1	1	1	1	1	1	1	1
group_1620		hypothetical protein	172	172	1	11	4915				695	695	695		1	1	1	1	1	1	1	1	1	1	1	1	1	1	1	1	1	1	1	1	1	1	1	1	1	1	1	1	1	1	1	1	1	1	1
group_1622		hypothetical protein	172	172	1	11	4914				329	329	329		1	1	1	1	1	1	1	1	1	1	1	1	1	1	1	1	1	1	1	1	1	1	1	1	1	1	1	1	1	1	1	1	1	1	1
yycI		Two-component system WalR/WalK regulatory protein YycI	172	172	1	11	4903				788	788	788		1	1	1	1	1	1	1	1	1	1	1	1	1	1	1	1	1	1	1	1	1	1	1	1	1	1	1	1	1	1	1	1	1	1	1
lysP_1		Lysine-specific permease	172	172	1	11	3031				1493	1493	1493		1	1	1	1	1	1	1	1	1	1	1	1	1	1	1	1	1	1	1	1	1	1	1	1	1	1	1	1	1	1	1	1	1	1	1
dtd		D-aminoacyl-tRNA deacylase	172	172	1	11	3071				305	452	447		1	1	1	1	1	1	1	1	1	1	1	1	1	1	1	1	1	1	1	1	1	1	1	1	1	1	1	1	1	1	1	1	1	1	1
group_1634		hypothetical protein	172	172	1	11	3079				146	146	146		1	1	1	1	1	1	1	1	1	1	1	1	1	1	1	1	1	1	1	1	1	1	1	1	1	1	1	1	1	1	1	1	1	1	1
yhbY		RNA-binding protein	172	172	1	11	3107				290	290	290		1	1	1	1	1	1	1	1	1	1	1	1	1	1	1	1	1	1	1	1	1	1	1	1	1	1	1	1	1	1	1	1	1	1	1
nadD		putative nicotinate-nucleotide adenylyltransferase	172	172	1	11	3108				569	569	569		1	1	1	1	1	1	1	1	1	1	1	1	1	1	1	1	1	1	1	1	1	1	1	1	1	1	1	1	1	1	1	1	1	1	1
tam		Trans-aconitate 2-methyltransferase	172	172	1	11	3111				689	716	715		1	1	1	1	1	1	1	1	1	1	1	1	1	1	1	1	1	1	1	1	1	1	1	1	1	1	1	1	1	1	1	1	1	1	1
ybeY		Endoribonuclease YbeY	172	172	1	11	3132				467	467	467		1	1	1	1	1	1	1	1	1	1	1	1	1	1	1	1	1	1	1	1	1	1	1	1	1	1	1	1	1	1	1	1	1	1	1
ccpN		Transcriptional repressor CcpN	172	172	1	11	3138				491	539	533		1	1	1	1	1	1	1	1	1	1	1	1	1	1	1	1	1	1	1	1	1	1	1	1	1	1	1	1	1	1	1	1	1	1	1
aroK		Shikimate kinase	172	172	1	11	3163				524	524	524		1	1	1	1	1	1	1	1	1	1	1	1	1	1	1	1	1	1	1	1	1	1	1	1	1	1	1	1	1	1	1	1	1	1	1
pdhC_1		Dihydrolipoyllysine-residue acetyltransferase component of pyruvate dehydrogenase complex	172	172	1	11	3186				1274	1274	1274		1	1	1	1	1	1	1	1	1	1	1	1	1	1	1	1	1	1	1	1	1	1	1	1	1	1	1	1	1	1	1	1	1	1	1
group_1654		hypothetical protein	172	172	1	11	3193				371	371	371		1	1	1	1	1	1	1	1	1	1	1	1	1	1	1	1	1	1	1	1	1	1	1	1	1	1	1	1	1	1	1	1	1	1	1
malR		HTH-type transcriptional regulator MalR	172	172	1	11	3194				1019	1019	1019		1	1	1	1	1	1	1	1	1	1	1	1	1	1	1	1	1	1	1	1	1	1	1	1	1	1	1	1	1	1	1	1	1	1	1
group_1658		hypothetical protein	172	172	1	11	3207				506	506	506		1	1	1	1	1	1	1	1	1	1	1	1	1	1	1	1	1	1	1	1	1	1	1	1	1	1	1	1	1	1	1	1	1	1	1
bcr_2		Bicyclomycin resistance protein	172	172	1	11	5824				956	1208	1205		1	1	1	1	1	1	1	1	1	1	1	1	1	1	1	1	1	1	1	1	1	1	1	1	1	1	1	1	1	1	1	1	1	1	1
aaeA		p-hydroxybenzoic acid efflux pump subunit AaeA	172	172	1	11	5827				647	647	647		1	1	1	1	1	1	1	1	1	1	1	1	1	1	1	1	1	1	1	1	1	1	1	1	1	1	1	1	1	1	1	1	1	1	1
group_1667		hypothetical protein	172	172	1	11	5832				491	509	492		1	1	1	1	1	1	1	1	1	1	1	1	1	1	1	1	1	1	1	1	1	1	1	1	1	1	1	1	1	1	1	1	1	1	1
group_1673		Putative formate dehydrogenase	172	172	1	11	5875				2954	3038	3027		1	1	1	1	1	1	1	1	1	1	1	1	1	1	1	1	1	1	1	1	1	1	1	1	1	1	1	1	1	1	1	1	1	1	1
group_1675		hypothetical protein	172	172	1	11	5876				473	473	473		1	1	1	1	1	1	1	1	1	1	1	1	1	1	1	1	1	1	1	1	1	1	1	1	1	1	1	1	1	1	1	1	1	1	1
ureC		Urease subunit alpha	172	172	1	11	169				1376	1715	1677		1	1	1	1	1	1	1	1	1	1	1	1	1	1	1	1	1	1	1	1	1	1	1	1	1	1	1	1	1	1	1	1	1	1	1
group_1679		Urea transporter	172	172	1	11	166				899	905	904		1	1	1	1	1	1	1	1	1	1	1	1	1	1	1	1	1	1	1	1	1	1	1	1	1	1	1	1	1	1	1	1	1	1	1
fhuD		Iron(3+)-hydroxamate-binding protein FhuD	172	172	1	11	164				860	908	907		1	1	1	1	1	1	1	1	1	1	1	1	1	1	1	1	1	1	1	1	1	1	1	1	1	1	1	1	1	1	1	1	1	1	1
group_1683		hypothetical protein	172	172	1	11	152				485	485	485		1	1	1	1	1	1	1	1	1	1	1	1	1	1	1	1	1	1	1	1	1	1	1	1	1	1	1	1	1	1	1	1	1	1	1
moaD		Molybdopterin synthase sulfur carrier subunit	172	172	1	11	150				233	233	233		1	1	1	1	1	1	1	1	1	1	1	1	1	1	1	1	1	1	1	1	1	1	1	1	1	1	1	1	1	1	1	1	1	1	1
group_1687		hypothetical protein	172	172	1	11	139				317	317	317		1	1	1	1	1	1	1	1	1	1	1	1	1	1	1	1	1	1	1	1	1	1	1	1	1	1	1	1	1	1	1	1	1	1	1
group_1689		hypothetical protein	172	172	1	11	138				164	164	164		1	1	1	1	1	1	1	1	1	1	1	1	1	1	1	1	1	1	1	1	1	1	1	1	1	1	1	1	1	1	1	1	1	1	1
ecfT_1		Energy-coupling factor transporter transmembrane protein EcfT	172	172	1	11	97				806	806	806		1	1	1	1	1	1	1	1	1	1	1	1	1	1	1	1	1	1	1	1	1	1	1	1	1	1	1	1	1	1	1	1	1	1	1
group_1694		hypothetical protein	172	172	1	11	61				869	869	869		1	1	1	1	1	1	1	1	1	1	1	1	1	1	1	1	1	1	1	1	1	1	1	1	1	1	1	1	1	1	1	1	1	1	1
opuD_3		Glycine betaine transporter OpuD	172	172	1	11	58				1562	1562	1562		1	1	1	1	1	1	1	1	1	1	1	1	1	1	1	1	1	1	1	1	1	1	1	1	1	1	1	1	1	1	1	1	1	1	1
group_1698		hypothetical protein	172	172	1	11	57				419	536	534		1	1	1	1	1	1	1	1	1	1	1	1	1	1	1	1	1	1	1	1	1	1	1	1	1	1	1	1	1	1	1	1	1	1	1
group_1700		hypothetical protein	172	172	1	11	56				239	239	239		1	1	1	1	1	1	1	1	1	1	1	1	1	1	1	1	1	1	1	1	1	1	1	1	1	1	1	1	1	1	1	1	1	1	1
group_1702		hypothetical protein	172	172	1	11	5811				1673	1673	1673		1	1	1	1	1	1	1	1	1	1	1	1	1	1	1	1	1	1	1	1	1	1	1	1	1	1	1	1	1	1	1	1	1	1	1
narX		Nitrate reductase-like protein NarX	172	172	1	11	5719				677	677	677		1	1	1	1	1	1	1	1	1	1	1	1	1	1	1	1	1	1	1	1	1	1	1	1	1	1	1	1	1	1	1	1	1	1	1
nasE		Assimilatory nitrite reductase [NAD(P)H] small subunit	172	172	1	11	5714				314	314	314		1	1	1	1	1	1	1	1	1	1	1	1	1	1	1	1	1	1	1	1	1	1	1	1	1	1	1	1	1	1	1	1	1	1	1
nirC		Nitrite transporter NirC	172	172	1	11	5708				824	824	824		1	1	1	1	1	1	1	1	1	1	1	1	1	1	1	1	1	1	1	1	1	1	1	1	1	1	1	1	1	1	1	1	1	1	1
femA_1		Aminoacyltransferase FemA	172	172	1	11	5699				1250	1250	1250		1	1	1	1	1	1	1	1	1	1	1	1	1	1	1	1	1	1	1	1	1	1	1	1	1	1	1	1	1	1	1	1	1	1	1
group_1731		hypothetical protein	172	172	1	11	5692				104	104	104		1	1	1	1	1	1	1	1	1	1	1	1	1	1	1	1	1	1	1	1	1	1	1	1	1	1	1	1	1	1	1	1	1	1	1
hlgB		Gamma-hemolysin component B	172	172	1	11	5683				977	977	977		1	1	1	1	1	1	1	1	1	1	1	1	1	1	1	1	1	1	1	1	1	1	1	1	1	1	1	1	1	1	1	1	1	1	1
bioW		6-carboxyhexanoate--CoA ligase	172	172	1	11	5681				692	692	692		1	1	1	1	1	1	1	1	1	1	1	1	1	1	1	1	1	1	1	1	1	1	1	1	1	1	1	1	1	1	1	1	1	1	1
group_1743		hypothetical protein	172	172	1	11	5669				521	659	654		1	1	1	1	1	1	1	1	1	1	1	1	1	1	1	1	1	1	1	1	1	1	1	1	1	1	1	1	1	1	1	1	1	1	1
hldD		ADP-L-glycero-D-manno-heptose-6-epimerase	172	172	1	11	5660				851	851	851		1	1	1	1	1	1	1	1	1	1	1	1	1	1	1	1	1	1	1	1	1	1	1	1	1	1	1	1	1	1	1	1	1	1	1
opuCC		Carnitine transport binding protein OpuCC	172	172	1	11	5656				941	941	941		1	1	1	1	1	1	1	1	1	1	1	1	1	1	1	1	1	1	1	1	1	1	1	1	1	1	1	1	1	1	1	1	1	1	1
fetB		putative iron export permease protein FetB	172	172	1	11	5648				776	776	776		1	1	1	1	1	1	1	1	1	1	1	1	1	1	1	1	1	1	1	1	1	1	1	1	1	1	1	1	1	1	1	1	1	1	1
cntD		Metal-staphylopine import system ATP-binding protein CntD	172	172	1	11	5636				815	815	815		1	1	1	1	1	1	1	1	1	1	1	1	1	1	1	1	1	1	1	1	1	1	1	1	1	1	1	1	1	1	1	1	1	1	1
abgT		p-aminobenzoyl-glutamate transport protein	172	172	1	11	5626				1538	1538	1538		1	1	1	1	1	1	1	1	1	1	1	1	1	1	1	1	1	1	1	1	1	1	1	1	1	1	1	1	1	1	1	1	1	1	1
group_1767		hypothetical protein	172	172	1	11	5613				281	281	281		1	1	1	1	1	1	1	1	1	1	1	1	1	1	1	1	1	1	1	1	1	1	1	1	1	1	1	1	1	1	1	1	1	1	1
tdcB		L-threonine dehydratase catabolic TdcB	172	172	1	11	3315				1040	1040	1040		1	1	1	1	1	1	1	1	1	1	1	1	1	1	1	1	1	1	1	1	1	1	1	1	1	1	1	1	1	1	1	1	1	1	1
ald1		Alanine dehydrogenase 1	172	172	1	11	3314				1118	1118	1118		1	1	1	1	1	1	1	1	1	1	1	1	1	1	1	1	1	1	1	1	1	1	1	1	1	1	1	1	1	1	1	1	1	1	1
ypcP		5'-3' exonuclease	172	172	1	11	3313				878	878	878		1	1	1	1	1	1	1	1	1	1	1	1	1	1	1	1	1	1	1	1	1	1	1	1	1	1	1	1	1	1	1	1	1	1	1
group_1782		hypothetical protein	172	172	1	11	3307				116	116	116		1	1	1	1	1	1	1	1	1	1	1	1	1	1	1	1	1	1	1	1	1	1	1	1	1	1	1	1	1	1	1	1	1	1	1
group_1783		hypothetical protein	172	172	1	11	3305				425	563	558		1	1	1	1	1	1	1	1	1	1	1	1	1	1	1	1	1	1	1	1	1	1	1	1	1	1	1	1	1	1	1	1	1	1	1
dnaD		DNA replication protein DnaD	172	172	1	11	3299				686	686	686		1	1	1	1	1	1	1	1	1	1	1	1	1	1	1	1	1	1	1	1	1	1	1	1	1	1	1	1	1	1	1	1	1	1	1
cca		CCA-adding enzyme	172	172	1	11	3295				1202	1202	1202		1	1	1	1	1	1	1	1	1	1	1	1	1	1	1	1	1	1	1	1	1	1	1	1	1	1	1	1	1	1	1	1	1	1	1
aroC		Chorismate synthase	172	172	1	11	3286				1166	1166	1166		1	1	1	1	1	1	1	1	1	1	1	1	1	1	1	1	1	1	1	1	1	1	1	1	1	1	1	1	1	1	1	1	1	1	1
group_1789		hypothetical protein	172	172	1	11	3270				953	953	953		1	1	1	1	1	1	1	1	1	1	1	1	1	1	1	1	1	1	1	1	1	1	1	1	1	1	1	1	1	1	1	1	1	1	1
group_1791		Ferredoxin	172	172	1	11	3269				248	248	248		1	1	1	1	1	1	1	1	1	1	1	1	1	1	1	1	1	1	1	1	1	1	1	1	1	1	1	1	1	1	1	1	1	1	1
sigB		RNA polymerase sigma-B factor	172	172	1	11	3754				743	770	767		1	1	1	1	1	1	1	1	1	1	1	1	1	1	1	1	1	1	1	1	1	1	1	1	1	1	1	1	1	1	1	1	1	1	1
acpS		Holo-[acyl-carrier-protein] synthase	172	172	1	11	3762				359	359	359		1	1	1	1	1	1	1	1	1	1	1	1	1	1	1	1	1	1	1	1	1	1	1	1	1	1	1	1	1	1	1	1	1	1	1
cshA		DEAD-box ATP-dependent RNA helicase CshA	172	172	1	11	3771				1487	1520	1519		1	1	1	1	1	1	1	1	1	1	1	1	1	1	1	1	1	1	1	1	1	1	1	1	1	1	1	1	1	1	1	1	1	1	1
murF		UDP-N-acetylmuramoyl-tripeptide--D-alanyl-D-alanine ligase	172	172	1	11	3772				1358	1358	1358		1	1	1	1	1	1	1	1	1	1	1	1	1	1	1	1	1	1	1	1	1	1	1	1	1	1	1	1	1	1	1	1	1	1	1
group_1826		hypothetical protein	172	172	1	11	3863				209	209	209		1	1	1	1	1	1	1	1	1	1	1	1	1	1	1	1	1	1	1	1	1	1	1	1	1	1	1	1	1	1	1	1	1	1	1
sceD		putative transglycosylase SceD	172	172	1	11	3853				695	695	695		1	1	1	1	1	1	1	1	1	1	1	1	1	1	1	1	1	1	1	1	1	1	1	1	1	1	1	1	1	1	1	1	1	1	1
ssbA_2		Single-stranded DNA-binding protein A	172	172	1	11	3851				347	395	394		1	1	1	1	1	1	1	1	1	1	1	1	1	1	1	1	1	1	1	1	1	1	1	1	1	1	1	1	1	1	1	1	1	1	1
mnaA_2		UDP-N-acetylglucosamine 2-epimerase	172	172	1	11	3836				1127	1130	1127		1	1	1	1	1	1	1	1	1	1	1	1	1	1	1	1	1	1	1	1	1	1	1	1	1	1	1	1	1	1	1	1	1	1	1
prmC		Release factor glutamine methyltransferase	172	172	1	11	3830				836	836	836		1	1	1	1	1	1	1	1	1	1	1	1	1	1	1	1	1	1	1	1	1	1	1	1	1	1	1	1	1	1	1	1	1	1	1
rpoE		putative DNA-directed RNA polymerase subunit delta	172	172	1	11	3819				530	530	530		1	1	1	1	1	1	1	1	1	1	1	1	1	1	1	1	1	1	1	1	1	1	1	1	1	1	1	1	1	1	1	1	1	1	1
yhfK		putative sugar epimerase YhfK	172	172	1	11	3803				665	665	665		1	1	1	1	1	1	1	1	1	1	1	1	1	1	1	1	1	1	1	1	1	1	1	1	1	1	1	1	1	1	1	1	1	1	1
mtlA		PTS system mannitol-specific EIICB component	172	172	1	11	3796				1538	1550	1539		1	1	1	1	1	1	1	1	1	1	1	1	1	1	1	1	1	1	1	1	1	1	1	1	1	1	1	1	1	1	1	1	1	1	1
yfcA		putative membrane transporter protein YfcA	172	172	1	11	2997				770	770	770		1	1	1	1	1	1	1	1	1	1	1	1	1	1	1	1	1	1	1	1	1	1	1	1	1	1	1	1	1	1	1	1	1	1	1
glpQ_1		Glycerophosphodiester phosphodiesterase	172	172	1	11	2882				743	743	743		1	1	1	1	1	1	1	1	1	1	1	1	1	1	1	1	1	1	1	1	1	1	1	1	1	1	1	1	1	1	1	1	1	1	1
group_1838		hypothetical protein	172	172	1	11	2878				1130	1130	1130		1	1	1	1	1	1	1	1	1	1	1	1	1	1	1	1	1	1	1	1	1	1	1	1	1	1	1	1	1	1	1	1	1	1	1
tyrS		Tyrosine--tRNA ligase	172	172	1	11	2874				1262	1262	1262		1	1	1	1	1	1	1	1	1	1	1	1	1	1	1	1	1	1	1	1	1	1	1	1	1	1	1	1	1	1	1	1	1	1	1
fhs		Formate--tetrahydrofolate ligase	172	172	1	11	2870				1667	1745	1675		1	1	1	1	1	1	1	1	1	1	1	1	1	1	1	1	1	1	1	1	1	1	1	1	1	1	1	1	1	1	1	1	1	1	1
group_1841		putative protein	172	172	1	11	2844				1268	1268	1268		1	1	1	1	1	1	1	1	1	1	1	1	1	1	1	1	1	1	1	1	1	1	1	1	1	1	1	1	1	1	1	1	1	1	1
group_1842		Sulfurtransferase	172	172	1	11	2838				311	311	311		1	1	1	1	1	1	1	1	1	1	1	1	1	1	1	1	1	1	1	1	1	1	1	1	1	1	1	1	1	1	1	1	1	1	1
ghrB_2		Glyoxylate/hydroxypyruvate reductase B	172	172	1	11	1918				959	959	959		1	1	1	1	1	1	1	1	1	1	1	1	1	1	1	1	1	1	1	1	1	1	1	1	1	1	1	1	1	1	1	1	1	1	1
group_1845		Putative multidrug export ATP-binding/permease protein	172	172	1	11	1922				1580	1736	1720		1	1	1	1	1	1	1	1	1	1	1	1	1	1	1	1	1	1	1	1	1	1	1	1	1	1	1	1	1	1	1	1	1	1	1
group_1847		hypothetical protein	172	172	1	11	1926				836	836	836		1	1	1	1	1	1	1	1	1	1	1	1	1	1	1	1	1	1	1	1	1	1	1	1	1	1	1	1	1	1	1	1	1	1	1
yfhH		putative protein YfhH	172	172	1	11	1928				266	314	310		1	1	1	1	1	1	1	1	1	1	1	1	1	1	1	1	1	1	1	1	1	1	1	1	1	1	1	1	1	1	1	1	1	1	1
group_1851		hypothetical protein	172	172	1	11	1935				1145	1151	1150		1	1	1	1	1	1	1	1	1	1	1	1	1	1	1	1	1	1	1	1	1	1	1	1	1	1	1	1	1	1	1	1	1	1	1
ptpA		Low molecular weight protein-tyrosine-phosphatase PtpA	172	172	1	11	1940				464	464	464		1	1	1	1	1	1	1	1	1	1	1	1	1	1	1	1	1	1	1	1	1	1	1	1	1	1	1	1	1	1	1	1	1	1	1
vraS		Sensor protein VraS	172	172	1	11	1966				932	1043	1042		1	1	1	1	1	1	1	1	1	1	1	1	1	1	1	1	1	1	1	1	1	1	1	1	1	1	1	1	1	1	1	1	1	1	1
putP		Sodium/proline symporter	172	172	1	11	1984				1496	1538	1537		1	1	1	1	1	1	1	1	1	1	1	1	1	1	1	1	1	1	1	1	1	1	1	1	1	1	1	1	1	1	1	1	1	1	1
nadE		NH(3)-dependent NAD(+) synthetase	172	172	1	11	1996				821	821	821		1	1	1	1	1	1	1	1	1	1	1	1	1	1	1	1	1	1	1	1	1	1	1	1	1	1	1	1	1	1	1	1	1	1	1
pheA		Bifunctional chorismate mutase/prephenate dehydratase	172	172	1	11	1999				776	794	793		1	1	1	1	1	1	1	1	1	1	1	1	1	1	1	1	1	1	1	1	1	1	1	1	1	1	1	1	1	1	1	1	1	1	1
group_1861		hypothetical protein	172	172	1	11	2007				401	401	401		1	1	1	1	1	1	1	1	1	1	1	1	1	1	1	1	1	1	1	1	1	1	1	1	1	1	1	1	1	1	1	1	1	1	1
nagB_2		Glucosamine-6-phosphate deaminase	172	172	1	11	2687				422	599	597		1	1	1	1	1	1	1	1	1	1	1	1	1	1	1	1	1	1	1	1	1	1	1	1	1	1	1	1	1	1	1	1	1	1	1
group_1863		hypothetical protein	172	172	1	11	2703				557	683	560		1	1	1	1	1	1	1	1	1	1	1	1	1	1	1	1	1	1	1	1	1	1	1	1	1	1	1	1	1	1	1	1	1	1	1
ecsA		ABC-type transporter ATP-binding protein EcsA	172	172	1	11	2706				716	740	739		1	1	1	1	1	1	1	1	1	1	1	1	1	1	1	1	1	1	1	1	1	1	1	1	1	1	1	1	1	1	1	1	1	1	1
ydeN		Putative hydrolase YdeN	172	172	1	11	2713				554	554	554		1	1	1	1	1	1	1	1	1	1	1	1	1	1	1	1	1	1	1	1	1	1	1	1	1	1	1	1	1	1	1	1	1	1	1
group_1874		hypothetical protein	172	172	1	11	1484				626	659	626		1	1	1	1	1	1	1	1	1	1	1	1	1	1	1	1	1	1	1	1	1	1	1	1	1	1	1	1	1	1	1	1	1	1	1
group_1875		hypothetical protein	172	172	1	11	1482				134	134	134		1	1	1	1	1	1	1	1	1	1	1	1	1	1	1	1	1	1	1	1	1	1	1	1	1	1	1	1	1	1	1	1	1	1	1
agrA		Accessory gene regulator protein A	172	172	1	11	1474				626	716	713		1	1	1	1	1	1	1	1	1	1	1	1	1	1	1	1	1	1	1	1	1	1	1	1	1	1	1	1	1	1	1	1	1	1	1
scrK		Fructokinase	172	172	1	11	1473				959	959	959		1	1	1	1	1	1	1	1	1	1	1	1	1	1	1	1	1	1	1	1	1	1	1	1	1	1	1	1	1	1	1	1	1	1	1
treR_2		HTH-type transcriptional regulator TreR	172	172	1	11	1471				881	950	949		1	1	1	1	1	1	1	1	1	1	1	1	1	1	1	1	1	1	1	1	1	1	1	1	1	1	1	1	1	1	1	1	1	1	1
leuD		3-isopropylmalate dehydratase small subunit	172	172	1	11	1452				572	581	572		1	1	1	1	1	1	1	1	1	1	1	1	1	1	1	1	1	1	1	1	1	1	1	1	1	1	1	1	1	1	1	1	1	1	1
ilvA		L-threonine dehydratase biosynthetic IlvA	172	172	1	11	1451				962	1268	1266		1	1	1	1	1	1	1	1	1	1	1	1	1	1	1	1	1	1	1	1	1	1	1	1	1	1	1	1	1	1	1	1	1	1	1
group_1884		hypothetical protein	172	172	1	11	4359				323	323	323		1	1	1	1	1	1	1	1	1	1	1	1	1	1	1	1	1	1	1	1	1	1	1	1	1	1	1	1	1	1	1	1	1	1	1
group_1886		hypothetical protein	172	172	1	11	4348				194	194	194		1	1	1	1	1	1	1	1	1	1	1	1	1	1	1	1	1	1	1	1	1	1	1	1	1	1	1	1	1	1	1	1	1	1	1
yciC_2		Putative metal chaperone YciC	172	172	1	11	4347				1202	1202	1202		1	1	1	1	1	1	1	1	1	1	1	1	1	1	1	1	1	1	1	1	1	1	1	1	1	1	1	1	1	1	1	1	1	1	1
group_1888		hypothetical protein	172	172	1	11	4344				2699	2705	2704		1	1	1	1	1	1	1	1	1	1	1	1	1	1	1	1	1	1	1	1	1	1	1	1	1	1	1	1	1	1	1	1	1	1	1
sle1		N-acetylmuramoyl-L-alanine amidase sle1	172	172	1	11	4333				1004	1025	1008		1	1	1	1	1	1	1	1	1	1	1	1	1	1	1	1	1	1	1	1	1	1	1	1	1	1	1	1	1	1	1	1	1	1	1
gltB		Glutamate synthase [NADPH] small chain	172	172	1	11	4325				1463	1463	1463		1	1	1	1	1	1	1	1	1	1	1	1	1	1	1	1	1	1	1	1	1	1	1	1	1	1	1	1	1	1	1	1	1	1	1
treP_2		PTS system trehalose-specific EIIBC component	172	172	1	11	4324				1427	1427	1427		1	1	1	1	1	1	1	1	1	1	1	1	1	1	1	1	1	1	1	1	1	1	1	1	1	1	1	1	1	1	1	1	1	1	1
treA		Trehalose-6-phosphate hydrolase	172	172	1	11	4323				1640	1640	1640		1	1	1	1	1	1	1	1	1	1	1	1	1	1	1	1	1	1	1	1	1	1	1	1	1	1	1	1	1	1	1	1	1	1	1
group_1894		hypothetical protein	172	172	1	11	2010				1040	1112	1104		1	1	1	1	1	1	1	1	1	1	1	1	1	1	1	1	1	1	1	1	1	1	1	1	1	1	1	1	1	1	1	1	1	1	1
folK		2-amino-4-hydroxy-6-hydroxymethyldihydropteridine pyrophosphokinase	172	172	1	12	16				476	476	476		1	1	1	1	1	1	1	1	1	1	1	1	1	1	1	1	1	1	1	1	1	1	1	1	1	1	1	1	1	1	1	1	1	1	1
yabJ		2-iminobutanoate/2-iminopropanoate deaminase	172	172	1	12	37				380	380	380		1	1	1	1	1	1	1	1	1	1	1	1	1	1	1	1	1	1	1	1	1	1	1	1	1	1	1	1	1	1	1	1	1	1	1
rsmA		Ribosomal RNA small subunit methyltransferase A	172	172	1	12	13				893	911	893		1	1	1	1	1	1	1	1	1	1	1	1	1	1	1	1	1	1	1	1	1	1	1	1	1	1	1	1	1	1	1	1	1	1	1
rnmV_2		Ribonuclease M5	172	172	1	12	12				536	536	536		1	1	1	1	1	1	1	1	1	1	1	1	1	1	1	1	1	1	1	1	1	1	1	1	1	1	1	1	1	1	1	1	1	1	1
group_1915		hypothetical protein	172	172	1	12	5				659	803	782		1	1	1	1	1	1	1	1	1	1	1	1	1	1	1	1	1	1	1	1	1	1	1	1	1	1	1	1	1	1	1	1	1	1	1
speA		Arginine decarboxylase	172	172	1	12	1				1337	1337	1337		1	1	1	1	1	1	1	1	1	1	1	1	1	1	1	1	1	1	1	1	1	1	1	1	1	1	1	1	1	1	1	1	1	1	1
group_1918		hypothetical protein	172	172	1	11	42				683	686	685		1	1	1	1	1	1	1	1	1	1	1	1	1	1	1	1	1	1	1	1	1	1	1	1	1	1	1	1	1	1	1	1	1	1	1
group_1920		putative uridylyltransferase	172	172	1	11	43				1187	1187	1187		1	1	1	1	1	1	1	1	1	1	1	1	1	1	1	1	1	1	1	1	1	1	1	1	1	1	1	1	1	1	1	1	1	1	1
group_1923		Putative membrane protein insertion efficiency factor	172	172	1	11	2801				257	257	257		1	1	1	1	1	1	1	1	1	1	1	1	1	1	1	1	1	1	1	1	1	1	1	1	1	1	1	1	1	1	1	1	1	1	1
crcB_2		Putative fluoride ion transporter CrcB	172	172	1	11	2810				353	353	353		1	1	1	1	1	1	1	1	1	1	1	1	1	1	1	1	1	1	1	1	1	1	1	1	1	1	1	1	1	1	1	1	1	1	1
crcB_1		Putative fluoride ion transporter CrcB	172	172	1	11	2811				365	365	365		1	1	1	1	1	1	1	1	1	1	1	1	1	1	1	1	1	1	1	1	1	1	1	1	1	1	1	1	1	1	1	1	1	1	1
atl_1		Bifunctional autolysin	172	172	1	11	2821				632	854	852		1	1	1	1	1	1	1	1	1	1	1	1	1	1	1	1	1	1	1	1	1	1	1	1	1	1	1	1	1	1	1	1	1	1	1
yvgN		Glyoxal reductase	172	172	1	11	2807				833	833	833		1	1	1	1	1	1	1	1	1	1	1	1	1	1	1	1	1	1	1	1	1	1	1	1	1	1	1	1	1	1	1	1	1	1	1
cntM		Staphylopine synthase	172	172	1	11	5632				1301	1304	1301		1	1	1	1	1	1	1	1	1	1	1	1	1	1	1	1	1	1	1	1	1	1	1	1	1	1	1	1	1	1	1	1	1	1	1
ssaA2		Staphylococcal secretory antigen ssaA2	172	172	1	11	5886				803	830	804		1	1	1	1	1	1	1	1	1	1	1	1	1	1	1	1	1	1	1	1	1	1	1	1	1	1	1	1	1	1	1	1	1	1	1
group_1985		Zinc-type alcohol dehydrogenase-like protein	172	172	1	11	59				1001	1007	1006		1	1	1	1	1	1	1	1	1	1	1	1	1	1	1	1	1	1	1	1	1	1	1	1	1	1	1	1	1	1	1	1	1	1	1
sepA		Multidrug resistance efflux pump SepA	172	172	1	11	40				467	473	468		1	1	1	1	1	1	1	1	1	1	1	1	1	1	1	1	1	1	1	1	1	1	1	1	1	1	1	1	1	1	1	1	1	1	1
thiE		Thiamine-phosphate synthase	172	172	1	11	3858				641	644	641		1	1	1	1	1	1	1	1	1	1	1	1	1	1	1	1	1	1	1	1	1	1	1	1	1	1	1	1	1	1	1	1	1	1	1
essB		Type VII secretion system protein EssB	172	172	1	11	4578				383	1340	1328		1	1	1	1	1	1	1	1	1	1	1	1	1	1	1	1	1	1	1	1	1	1	1	1	1	1	1	1	1	1	1	1	1	1	1
group_219		Serine protease HtrA-like protein	172	172	1	11	4068				734	2309	2297		1	1	1	1	1	1	1	1	1	1	1	1	1	1	1	1	1	1	1	1	1	1	1	1	1	1	1	1	1	1	1	1	1	1	1
isdA		Iron-regulated surface determinant protein A	172	172	1	11	3954				1052	1079	1061		1	1	1	1	1	1	1	1	1	1	1	1	1	1	1	1	1	1	1	1	1	1	1	1	1	1	1	1	1	1	1	1	1	1	1
tatC2		Sec-independent protein translocase protein TatCy	172	172	1	11	4473				479	701	583		1	1	1	1	1	1	1	1	1	1	1	1	1	1	1	1	1	1	1	1	1	1	1	1	1	1	1	1	1	1	1	1	1	1	1
group_231		hypothetical protein	172	172	1	11	4471				389	413	389		1	1	1	1	1	1	1	1	1	1	1	1	1	1	1	1	1	1	1	1	1	1	1	1	1	1	1	1	1	1	1	1	1	1	1
group_232		hypothetical protein	172	172	1	11	4436				191	1619	403		1	1	1	1	1	1	1	1	1	1	1	1	1	1	1	1	1	1	1	1	1	1	1	1	1	1	1	1	1	1	1	1	1	1	1
lipR		Putative acetyl-hydrolase LipR	172	172	1	11	5147				743	968	937		1	1	1	1	1	1	1	1	1	1	1	1	1	1	1	1	1	1	1	1	1	1	1	1	1	1	1	1	1	1	1	1	1	1	1
bacF		Transaminase BacF	172	172	1	11	5116				377	1154	1007		1	1	1	1	1	1	1	1	1	1	1	1	1	1	1	1	1	1	1	1	1	1	1	1	1	1	1	1	1	1	1	1	1	1	1
group_243		hypothetical protein	172	172	1	11	4901				2300	2318	2315		1	1	1	1	1	1	1	1	1	1	1	1	1	1	1	1	1	1	1	1	1	1	1	1	1	1	1	1	1	1	1	1	1	1	1
entA_1		Enterotoxin type A	172	172	1	11	3101				188	752	286		1	1	1	1	1	1	1	1	1	1	1	1	1	1	1	1	1	1	1	1	1	1	1	1	1	1	1	1	1	1	1	1	1	1	1
group_252		hypothetical protein	172	172	1	11	3304				350	404	393		1	1	1	1	1	1	1	1	1	1	1	1	1	1	1	1	1	1	1	1	1	1	1	1	1	1	1	1	1	1	1	1	1	1	1
ylmA		putative ABC transporter ATP-binding protein YlmA	172	172	1	11	3798				782	782	782		1	1	1	1	1	1	1	1	1	1	1	1	1	1	1	1	1	1	1	1	1	1	1	1	1	1	1	1	1	1	1	1	1	1	1
group_256		hypothetical protein	172	172	1	11	1475				695	1292	1281		1	1	1	1	1	1	1	1	1	1	1	1	1	1	1	1	1	1	1	1	1	1	1	1	1	1	1	1	1	1	1	1	1	1	1
phrB		Deoxyribodipyrimidine photo-lyase	172	172	1	11	1344				572	1373	1350		1	1	1	1	1	1	1	1	1	1	1	1	1	1	1	1	1	1	1	1	1	1	1	1	1	1	1	1	1	1	1	1	1	1	1
lytN		putative cell wall hydrolase LytN	172	172	1	11	3694				125	1118	1102		1	1	1	1	1	1	1	1	1	1	1	1	1	1	1	1	1	1	1	1	1	1	1	1	1	1	1	1	1	1	1	1	1	1	1
group_341		hypothetical protein	172	172	1	11	4826				482	482	482		1	1	1	1	1	1	1	1	1	1	1	1	1	1	1	1	1	1	1	1	1	1	1	1	1	1	1	1	1	1	1	1	1	1	1
wecA		hypothetical protein	172	172	1	11	4785				689	692	691		1	1	1	1	1	1	1	1	1	1	1	1	1	1	1	1	1	1	1	1	1	1	1	1	1	1	1	1	1	1	1	1	1	1	1
yfkN		Trifunctional nucleotide phosphoesterase protein YfkN	172	172	1	11	4766				1535	1535	1535		1	1	1	1	1	1	1	1	1	1	1	1	1	1	1	1	1	1	1	1	1	1	1	1	1	1	1	1	1	1	1	1	1	1	1
grsB		Gramicidin S synthase 2	172	172	1	11	4704				4841	7175	7161		1	1	1	1	1	1	1	1	1	1	1	1	1	1	1	1	1	1	1	1	1	1	1	1	1	1	1	1	1	1	1	1	1	1	1
group_354		hypothetical protein	172	172	1	11	4474				1712	1712	1712		1	1	1	1	1	1	1	1	1	1	1	1	1	1	1	1	1	1	1	1	1	1	1	1	1	1	1	1	1	1	1	1	1	1	1
group_357		hypothetical protein	172	172	1	11	4439				386	386	386		1	1	1	1	1	1	1	1	1	1	1	1	1	1	1	1	1	1	1	1	1	1	1	1	1	1	1	1	1	1	1	1	1	1	1
group_358		hypothetical protein	172	172	1	11	5176				1007	1823	1798		1	1	1	1	1	1	1	1	1	1	1	1	1	1	1	1	1	1	1	1	1	1	1	1	1	1	1	1	1	1	1	1	1	1	1
mhqD		Putative hydrolase MhqD	172	172	1	11	5166				593	593	593		1	1	1	1	1	1	1	1	1	1	1	1	1	1	1	1	1	1	1	1	1	1	1	1	1	1	1	1	1	1	1	1	1	1	1
glcB		PTS system glucoside-specific EIICBA component	172	172	1	11	5144				809	2123	2094		1	1	1	1	1	1	1	1	1	1	1	1	1	1	1	1	1	1	1	1	1	1	1	1	1	1	1	1	1	1	1	1	1	1	1
group_374		hypothetical protein	172	172	1	11	4995				284	2093	499		1	1	1	1	1	1	1	1	1	1	1	1	1	1	1	1	1	1	1	1	1	1	1	1	1	1	1	1	1	1	1	1	1	1	1
icaR		Biofilm operon icaADBC HTH-type negative transcriptional regulator IcaR	172	172	1	11	4981				278	560	553		1	1	1	1	1	1	1	1	1	1	1	1	1	1	1	1	1	1	1	1	1	1	1	1	1	1	1	1	1	1	1	1	1	1	1
pcp		Pyrrolidone-carboxylate peptidase	172	172	1	11	4951				638	638	638		1	1	1	1	1	1	1	1	1	1	1	1	1	1	1	1	1	1	1	1	1	1	1	1	1	1	1	1	1	1	1	1	1	1	1
comEC		ComE operon protein 3	172	172	1	11	3115				791	2210	2189		1	1	1	1	1	1	1	1	1	1	1	1	1	1	1	1	1	1	1	1	1	1	1	1	1	1	1	1	1	1	1	1	1	1	1
group_380		hypothetical protein	172	172	1	11	3158				257	1070	1047		1	1	1	1	1	1	1	1	1	1	1	1	1	1	1	1	1	1	1	1	1	1	1	1	1	1	1	1	1	1	1	1	1	1	1
group_382		hypothetical protein	172	172	1	11	3202				248	248	248		1	1	1	1	1	1	1	1	1	1	1	1	1	1	1	1	1	1	1	1	1	1	1	1	1	1	1	1	1	1	1	1	1	1	1
swrC		Swarming motility protein SwrC	172	172	1	11	141				1499	3167	3153		1	1	1	1	1	1	1	1	1	1	1	1	1	1	1	1	1	1	1	1	1	1	1	1	1	1	1	1	1	1	1	1	1	1	1
secG		putative protein-export membrane protein SecG	172	172	1	11	1437				233	233	233		1	1	1	1	1	1	1	1	1	1	1	1	1	1	1	1	1	1	1	1	1	1	1	1	1	1	1	1	1	1	1	1	1	1	1
purR		Pur operon repressor	172	172	1	12	38				824	824	824		1	1	1	1	1	1	1	1	1	1	1	1	1	1	1	1	1	1	1	1	1	1	1	1	1	1	1	1	1	1	1	1	1	1	1
divIC		Cell division protein DivIC	172	172	1	12	26				392	392	392		1	1	1	1	1	1	1	1	1	1	1	1	1	1	1	1	1	1	1	1	1	1	1	1	1	1	1	1	1	1	1	1	1	1	1
rplJ		50S ribosomal protein L10	172	172	1	11	1012				500	500	500		1	1	1	1	1	1	1	1	1	1	1	1	1	1	1	1	1	1	1	1	1	1	1	1	1	1	1	1	1	1	1	1	1	1	1
group_3923		hypothetical protein	172	172	1	11	3864				137	137	137		1	1	1	1	1	1	1	1	1	1	1	1	1	1	1	1	1	1	1	1	1	1	1	1	1	1	1	1	1	1	1	1	1	1	1
fba		Fructose-bisphosphate aldolase	172	172	1	11	3822				860	860	860		1	1	1	1	1	1	1	1	1	1	1	1	1	1	1	1	1	1	1	1	1	1	1	1	1	1	1	1	1	1	1	1	1	1	1
rplK		50S ribosomal protein L11	172	172	1	11	1010				422	422	422		1	1	1	1	1	1	1	1	1	1	1	1	1	1	1	1	1	1	1	1	1	1	1	1	1	1	1	1	1	1	1	1	1	1	1
rpmH		50S ribosomal protein L34	172	172	1	11	4925				137	137	137		1	1	1	1	1	1	1	1	1	1	1	1	1	1	1	1	1	1	1	1	1	1	1	1	1	1	1	1	1	1	1	1	1	1	1
group_3927		hypothetical protein	172	172	1	11	3968				254	254	254		1	1	1	1	1	1	1	1	1	1	1	1	1	1	1	1	1	1	1	1	1	1	1	1	1	1	1	1	1	1	1	1	1	1	1
pyrR		Bifunctional protein PyrR	172	172	1	11	3747				527	527	527		1	1	1	1	1	1	1	1	1	1	1	1	1	1	1	1	1	1	1	1	1	1	1	1	1	1	1	1	1	1	1	1	1	1	1
cobB		NAD-dependent protein deacetylase	172	172	1	11	72				740	740	740		1	1	1	1	1	1	1	1	1	1	1	1	1	1	1	1	1	1	1	1	1	1	1	1	1	1	1	1	1	1	1	1	1	1	1
pnp_2		Polyribonucleotide nucleotidyltransferase	172	172	1	12	25				401	401	401		1	1	1	1	1	1	1	1	1	1	1	1	1	1	1	1	1	1	1	1	1	1	1	1	1	1	1	1	1	1	1	1	1	1	1
tatAy		Sec-independent protein translocase protein TatAy	172	172	1	11	4472				215	215	215		1	1	1	1	1	1	1	1	1	1	1	1	1	1	1	1	1	1	1	1	1	1	1	1	1	1	1	1	1	1	1	1	1	1	1
tarD		Glycerol-3-phosphate cytidylyltransferase	172	172	1	11	1257				398	398	398		1	1	1	1	1	1	1	1	1	1	1	1	1	1	1	1	1	1	1	1	1	1	1	1	1	1	1	1	1	1	1	1	1	1	1
sucC		Succinate--CoA ligase [ADP-forming] subunit beta	172	172	1	11	3697				1166	1166	1166		1	1	1	1	1	1	1	1	1	1	1	1	1	1	1	1	1	1	1	1	1	1	1	1	1	1	1	1	1	1	1	1	1	1	1
group_3937		hypothetical protein	172	172	1	11	5128				227	227	227		1	1	1	1	1	1	1	1	1	1	1	1	1	1	1	1	1	1	1	1	1	1	1	1	1	1	1	1	1	1	1	1	1	1	1
rutB		Peroxyureidoacrylate/ureidoacrylate amidohydrolase RutB	172	172	1	11	2003				560	560	560		1	1	1	1	1	1	1	1	1	1	1	1	1	1	1	1	1	1	1	1	1	1	1	1	1	1	1	1	1	1	1	1	1	1	1
group_3939		hypothetical protein	172	172	1	11	4028				317	317	317		1	1	1	1	1	1	1	1	1	1	1	1	1	1	1	1	1	1	1	1	1	1	1	1	1	1	1	1	1	1	1	1	1	1	1
gatB_1		PTS system galactitol-specific EIIB component	172	172	1	11	4628				278	278	278		1	1	1	1	1	1	1	1	1	1	1	1	1	1	1	1	1	1	1	1	1	1	1	1	1	1	1	1	1	1	1	1	1	1	1
rpmB		50S ribosomal protein L28	172	172	1	11	3719				188	188	188		1	1	1	1	1	1	1	1	1	1	1	1	1	1	1	1	1	1	1	1	1	1	1	1	1	1	1	1	1	1	1	1	1	1	1
veg		Protein Veg	172	172	1	12	14				263	263	263		1	1	1	1	1	1	1	1	1	1	1	1	1	1	1	1	1	1	1	1	1	1	1	1	1	1	1	1	1	1	1	1	1	1	1
group_3943		hypothetical protein	172	172	1	11	3292				698	698	698		1	1	1	1	1	1	1	1	1	1	1	1	1	1	1	1	1	1	1	1	1	1	1	1	1	1	1	1	1	1	1	1	1	1	1
pyrH		Uridylate kinase	172	172	1	11	3683				722	722	722		1	1	1	1	1	1	1	1	1	1	1	1	1	1	1	1	1	1	1	1	1	1	1	1	1	1	1	1	1	1	1	1	1	1	1
group_3945		hypothetical protein	172	172	1	11	1364				473	473	473		1	1	1	1	1	1	1	1	1	1	1	1	1	1	1	1	1	1	1	1	1	1	1	1	1	1	1	1	1	1	1	1	1	1	1
mnhC1		Na(+)/H(+) antiporter subunit C1	172	172	1	11	4147				341	341	341		1	1	1	1	1	1	1	1	1	1	1	1	1	1	1	1	1	1	1	1	1	1	1	1	1	1	1	1	1	1	1	1	1	1	1
group_3947		hypothetical protein	172	172	1	11	4172				383	383	383		1	1	1	1	1	1	1	1	1	1	1	1	1	1	1	1	1	1	1	1	1	1	1	1	1	1	1	1	1	1	1	1	1	1	1
ktrA		Ktr system potassium uptake protein A	172	172	1	11	4001				662	662	662		1	1	1	1	1	1	1	1	1	1	1	1	1	1	1	1	1	1	1	1	1	1	1	1	1	1	1	1	1	1	1	1	1	1	1
gatC_2		Aspartyl/glutamyl-tRNA(Asn/Gln) amidotransferase subunit C	172	172	1	11	1983				302	302	302		1	1	1	1	1	1	1	1	1	1	1	1	1	1	1	1	1	1	1	1	1	1	1	1	1	1	1	1	1	1	1	1	1	1	1
rbfA		Ribosome-binding factor A	172	172	1	11	3671				350	350	350		1	1	1	1	1	1	1	1	1	1	1	1	1	1	1	1	1	1	1	1	1	1	1	1	1	1	1	1	1	1	1	1	1	1	1
ssbA_1		Single-stranded DNA-binding protein A	172	172	1	11	4453				503	503	503		1	1	1	1	1	1	1	1	1	1	1	1	1	1	1	1	1	1	1	1	1	1	1	1	1	1	1	1	1	1	1	1	1	1	1
rpsF		30S ribosomal protein S6	172	172	1	11	4454				296	296	296		1	1	1	1	1	1	1	1	1	1	1	1	1	1	1	1	1	1	1	1	1	1	1	1	1	1	1	1	1	1	1	1	1	1	1
rsbV		Anti-sigma-B factor antagonist	172	172	1	11	3756				326	326	326		1	1	1	1	1	1	1	1	1	1	1	1	1	1	1	1	1	1	1	1	1	1	1	1	1	1	1	1	1	1	1	1	1	1	1
atpC		ATP synthase epsilon chain	172	172	1	11	3846				404	404	404		1	1	1	1	1	1	1	1	1	1	1	1	1	1	1	1	1	1	1	1	1	1	1	1	1	1	1	1	1	1	1	1	1	1	1
sepF		Cell division protein SepF	172	172	1	11	3872				563	563	563		1	1	1	1	1	1	1	1	1	1	1	1	1	1	1	1	1	1	1	1	1	1	1	1	1	1	1	1	1	1	1	1	1	1	1
mnhF1		Na(+)/H(+) antiporter subunit F1	172	172	1	11	4150				293	293	293		1	1	1	1	1	1	1	1	1	1	1	1	1	1	1	1	1	1	1	1	1	1	1	1	1	1	1	1	1	1	1	1	1	1	1
yjlD		NADH dehydrogenase-like protein YjlD	172	172	1	11	4159				1064	1064	1064		1	1	1	1	1	1	1	1	1	1	1	1	1	1	1	1	1	1	1	1	1	1	1	1	1	1	1	1	1	1	1	1	1	1	1
group_3962		hypothetical protein	172	172	1	11	4218				260	260	260		1	1	1	1	1	1	1	1	1	1	1	1	1	1	1	1	1	1	1	1	1	1	1	1	1	1	1	1	1	1	1	1	1	1	1
nrdI		Protein NrdI	172	172	1	11	1388				398	398	398		1	1	1	1	1	1	1	1	1	1	1	1	1	1	1	1	1	1	1	1	1	1	1	1	1	1	1	1	1	1	1	1	1	1	1
group_3964		hypothetical protein	172	172	1	12	8				248	248	248		1	1	1	1	1	1	1	1	1	1	1	1	1	1	1	1	1	1	1	1	1	1	1	1	1	1	1	1	1	1	1	1	1	1	1
yjjP		Inner membrane protein YjjP	172	172	1	11	1403				761	761	761		1	1	1	1	1	1	1	1	1	1	1	1	1	1	1	1	1	1	1	1	1	1	1	1	1	1	1	1	1	1	1	1	1	1	1
esaB		Type VII secretion system accessory factor EsaB	172	172	1	11	4579				242	242	242		1	1	1	1	1	1	1	1	1	1	1	1	1	1	1	1	1	1	1	1	1	1	1	1	1	1	1	1	1	1	1	1	1	1	1
rplGB		Ribosome-associated protein L7Ae-like protein	172	172	1	11	1017				254	254	254		1	1	1	1	1	1	1	1	1	1	1	1	1	1	1	1	1	1	1	1	1	1	1	1	1	1	1	1	1	1	1	1	1	1	1
group_3968		Antibacterial protein 3	172	172	1	11	3888				134	134	134		1	1	1	1	1	1	1	1	1	1	1	1	1	1	1	1	1	1	1	1	1	1	1	1	1	1	1	1	1	1	1	1	1	1	1
cdaA		Cyclic di-AMP synthase CdaA	172	172	1	11	3788				809	809	809		1	1	1	1	1	1	1	1	1	1	1	1	1	1	1	1	1	1	1	1	1	1	1	1	1	1	1	1	1	1	1	1	1	1	1
group_3970		hypothetical protein	172	172	1	11	4186				1397	1397	1397		1	1	1	1	1	1	1	1	1	1	1	1	1	1	1	1	1	1	1	1	1	1	1	1	1	1	1	1	1	1	1	1	1	1	1
group_3971		hypothetical protein	172	172	1	11	4625				146	146	146		1	1	1	1	1	1	1	1	1	1	1	1	1	1	1	1	1	1	1	1	1	1	1	1	1	1	1	1	1	1	1	1	1	1	1
lrgA		Antiholin-like protein LrgA	172	172	1	11	4611				437	437	437		1	1	1	1	1	1	1	1	1	1	1	1	1	1	1	1	1	1	1	1	1	1	1	1	1	1	1	1	1	1	1	1	1	1	1
mazE		Antitoxin MazE	172	172	1	11	3760				170	170	170		1	1	1	1	1	1	1	1	1	1	1	1	1	1	1	1	1	1	1	1	1	1	1	1	1	1	1	1	1	1	1	1	1	1	1
mraZ		Transcriptional regulator MraZ	172	172	1	11	3883				431	431	431		1	1	1	1	1	1	1	1	1	1	1	1	1	1	1	1	1	1	1	1	1	1	1	1	1	1	1	1	1	1	1	1	1	1	1
ftsZ		Cell division protein FtsZ	172	172	1	11	3875				1172	1172	1172		1	1	1	1	1	1	1	1	1	1	1	1	1	1	1	1	1	1	1	1	1	1	1	1	1	1	1	1	1	1	1	1	1	1	1
pflB		Formate acetyltransferase	172	172	1	11	4652				2249	2249	2249		1	1	1	1	1	1	1	1	1	1	1	1	1	1	1	1	1	1	1	1	1	1	1	1	1	1	1	1	1	1	1	1	1	1	1
group_3979		hypothetical protein	172	172	1	11	1989				302	302	302		1	1	1	1	1	1	1	1	1	1	1	1	1	1	1	1	1	1	1	1	1	1	1	1	1	1	1	1	1	1	1	1	1	1	1
ppaC		putative manganese-dependent inorganic pyrophosphatase	172	172	1	11	2004				929	929	929		1	1	1	1	1	1	1	1	1	1	1	1	1	1	1	1	1	1	1	1	1	1	1	1	1	1	1	1	1	1	1	1	1	1	1
group_3981		hypothetical protein	172	172	1	11	1282				617	617	617		1	1	1	1	1	1	1	1	1	1	1	1	1	1	1	1	1	1	1	1	1	1	1	1	1	1	1	1	1	1	1	1	1	1	1
atpA		ATP synthase subunit alpha	172	172	1	11	3843				1508	1508	1508		1	1	1	1	1	1	1	1	1	1	1	1	1	1	1	1	1	1	1	1	1	1	1	1	1	1	1	1	1	1	1	1	1	1	1
group_3983		hypothetical protein	172	172	1	11	1283				1007	1007	1007		1	1	1	1	1	1	1	1	1	1	1	1	1	1	1	1	1	1	1	1	1	1	1	1	1	1	1	1	1	1	1	1	1	1	1
prs		Ribose-phosphate pyrophosphokinase	172	172	1	12	34				965	965	965		1	1	1	1	1	1	1	1	1	1	1	1	1	1	1	1	1	1	1	1	1	1	1	1	1	1	1	1	1	1	1	1	1	1	1
ydcV		Inner membrane ABC transporter permease protein YdcV	172	172	1	11	3988				809	809	809		1	1	1	1	1	1	1	1	1	1	1	1	1	1	1	1	1	1	1	1	1	1	1	1	1	1	1	1	1	1	1	1	1	1	1
group_3986		NADH dehydrogenase-like protein	172	172	1	11	4156				1208	1208	1208		1	1	1	1	1	1	1	1	1	1	1	1	1	1	1	1	1	1	1	1	1	1	1	1	1	1	1	1	1	1	1	1	1	1	1
upp		Uracil phosphoribosyltransferase	172	172	1	11	3835				629	629	629		1	1	1	1	1	1	1	1	1	1	1	1	1	1	1	1	1	1	1	1	1	1	1	1	1	1	1	1	1	1	1	1	1	1	1
clpP_1		ATP-dependent Clp protease proteolytic subunit	172	172	1	11	1426				587	587	587		1	1	1	1	1	1	1	1	1	1	1	1	1	1	1	1	1	1	1	1	1	1	1	1	1	1	1	1	1	1	1	1	1	1	1
mntR		HTH-type transcriptional regulator MntR	172	172	1	11	1250				644	644	644		1	1	1	1	1	1	1	1	1	1	1	1	1	1	1	1	1	1	1	1	1	1	1	1	1	1	1	1	1	1	1	1	1	1	1
group_399		hypothetical protein	172	172	1	11	5639				749	749	749		1	1	1	1	1	1	1	1	1	1	1	1	1	1	1	1	1	1	1	1	1	1	1	1	1	1	1	1	1	1	1	1	1	1	1
yugI		General stress protein 13	172	172	1	11	4142				377	377	377		1	1	1	1	1	1	1	1	1	1	1	1	1	1	1	1	1	1	1	1	1	1	1	1	1	1	1	1	1	1	1	1	1	1	1
qoxA		putative quinol oxidase subunit 2	172	172	1	11	4030				1100	1100	1100		1	1	1	1	1	1	1	1	1	1	1	1	1	1	1	1	1	1	1	1	1	1	1	1	1	1	1	1	1	1	1	1	1	1	1
rpsO		30S ribosomal protein S15	172	172	1	11	3668				269	269	269		1	1	1	1	1	1	1	1	1	1	1	1	1	1	1	1	1	1	1	1	1	1	1	1	1	1	1	1	1	1	1	1	1	1	1
group_3993		hypothetical protein	172	172	1	11	2697				344	344	344		1	1	1	1	1	1	1	1	1	1	1	1	1	1	1	1	1	1	1	1	1	1	1	1	1	1	1	1	1	1	1	1	1	1	1
group_3994	ybbH_2	putative HTH-type transcriptional regulator YbbH	172	172	1	11	4685				878	878	878		1	1	1	1	1	1	1	1	1	1	1	1	1	1	1	1	1	1	1	1	1	1	1	1	1	1	1	1	1	1	1	1	1	1	1
group_3997		hypothetical protein	172	172	1	12	27				263	263	263		1	1	1	1	1	1	1	1	1	1	1	1	1	1	1	1	1	1	1	1	1	1	1	1	1	1	1	1	1	1	1	1	1	1	1
esxA		Type VII secretion system extracellular protein A	172	172	1	11	4584				293	293	293		1	1	1	1	1	1	1	1	1	1	1	1	1	1	1	1	1	1	1	1	1	1	1	1	1	1	1	1	1	1	1	1	1	1	1
group_4003		hypothetical protein	172	172	1	11	4193				194	194	194		1	1	1	1	1	1	1	1	1	1	1	1	1	1	1	1	1	1	1	1	1	1	1	1	1	1	1	1	1	1	1	1	1	1	1
atpE		ATP synthase subunit c	172	172	1	11	3840				212	212	212		1	1	1	1	1	1	1	1	1	1	1	1	1	1	1	1	1	1	1	1	1	1	1	1	1	1	1	1	1	1	1	1	1	1	1
rpmE2		50S ribosomal protein L31 type B	172	172	1	11	3827				254	254	254		1	1	1	1	1	1	1	1	1	1	1	1	1	1	1	1	1	1	1	1	1	1	1	1	1	1	1	1	1	1	1	1	1	1	1
ptsH		Phosphocarrier protein HPr	172	172	1	11	4006				266	266	266		1	1	1	1	1	1	1	1	1	1	1	1	1	1	1	1	1	1	1	1	1	1	1	1	1	1	1	1	1	1	1	1	1	1	1
fusA		Elongation factor G	172	172	1	11	1020				2081	2081	2081		1	1	1	1	1	1	1	1	1	1	1	1	1	1	1	1	1	1	1	1	1	1	1	1	1	1	1	1	1	1	1	1	1	1	1
trxA		Thioredoxin	172	172	1	11	3939				314	314	314		1	1	1	1	1	1	1	1	1	1	1	1	1	1	1	1	1	1	1	1	1	1	1	1	1	1	1	1	1	1	1	1	1	1	1
group_4013		hypothetical protein	172	172	1	11	4443				263	263	263		1	1	1	1	1	1	1	1	1	1	1	1	1	1	1	1	1	1	1	1	1	1	1	1	1	1	1	1	1	1	1	1	1	1	1
rpsL		30S ribosomal protein S12	172	172	1	11	1018				413	413	413		1	1	1	1	1	1	1	1	1	1	1	1	1	1	1	1	1	1	1	1	1	1	1	1	1	1	1	1	1	1	1	1	1	1	1
rpsG		30S ribosomal protein S7	172	172	1	11	1019				470	470	470		1	1	1	1	1	1	1	1	1	1	1	1	1	1	1	1	1	1	1	1	1	1	1	1	1	1	1	1	1	1	1	1	1	1	1
gpsB		Cell cycle protein GpsB	172	172	1	11	3306				344	344	344		1	1	1	1	1	1	1	1	1	1	1	1	1	1	1	1	1	1	1	1	1	1	1	1	1	1	1	1	1	1	1	1	1	1	1
fabZ		3-hydroxyacyl-[acyl-carrier-protein] dehydratase FabZ	172	172	1	11	3849				440	440	440		1	1	1	1	1	1	1	1	1	1	1	1	1	1	1	1	1	1	1	1	1	1	1	1	1	1	1	1	1	1	1	1	1	1	1
group_4022		hypothetical protein	172	172	1	11	5060				212	212	212		1	1	1	1	1	1	1	1	1	1	1	1	1	1	1	1	1	1	1	1	1	1	1	1	1	1	1	1	1	1	1	1	1	1	1
ftsL		Cell division protein FtsL	172	172	1	11	3881				401	401	401		1	1	1	1	1	1	1	1	1	1	1	1	1	1	1	1	1	1	1	1	1	1	1	1	1	1	1	1	1	1	1	1	1	1	1
cspA_2		Cold shock protein CspA	172	172	1	11	4223				200	200	200		1	1	1	1	1	1	1	1	1	1	1	1	1	1	1	1	1	1	1	1	1	1	1	1	1	1	1	1	1	1	1	1	1	1	1
dnaN		Beta sliding clamp	172	172	1	11	4923				1133	1133	1133		1	1	1	1	1	1	1	1	1	1	1	1	1	1	1	1	1	1	1	1	1	1	1	1	1	1	1	1	1	1	1	1	1	1	1
group_4028		hypothetical protein	172	172	1	11	1269				497	497	497		1	1	1	1	1	1	1	1	1	1	1	1	1	1	1	1	1	1	1	1	1	1	1	1	1	1	1	1	1	1	1	1	1	1	1
group_4029		hypothetical protein	172	172	1	11	4922				236	236	236		1	1	1	1	1	1	1	1	1	1	1	1	1	1	1	1	1	1	1	1	1	1	1	1	1	1	1	1	1	1	1	1	1	1	1
rpoZ		DNA-directed RNA polymerase subunit omega	172	172	1	11	3735				218	218	218		1	1	1	1	1	1	1	1	1	1	1	1	1	1	1	1	1	1	1	1	1	1	1	1	1	1	1	1	1	1	1	1	1	1	1
acpP		Acyl carrier protein	172	172	1	11	3711				233	233	233		1	1	1	1	1	1	1	1	1	1	1	1	1	1	1	1	1	1	1	1	1	1	1	1	1	1	1	1	1	1	1	1	1	1	1
ahpC		Alkyl hydroperoxide reductase C	172	172	1	11	4434				569	569	569		1	1	1	1	1	1	1	1	1	1	1	1	1	1	1	1	1	1	1	1	1	1	1	1	1	1	1	1	1	1	1	1	1	1	1
group_4033		hypothetical protein	172	172	1	11	1458				254	254	254		1	1	1	1	1	1	1	1	1	1	1	1	1	1	1	1	1	1	1	1	1	1	1	1	1	1	1	1	1	1	1	1	1	1	1
mqo2		putative malate:quinone oxidoreductase 2	172	172	1	11	5065				1496	1496	1496		1	1	1	1	1	1	1	1	1	1	1	1	1	1	1	1	1	1	1	1	1	1	1	1	1	1	1	1	1	1	1	1	1	1	1
hpf		Ribosome hibernation promotion factor	172	172	1	11	1410				572	572	572		1	1	1	1	1	1	1	1	1	1	1	1	1	1	1	1	1	1	1	1	1	1	1	1	1	1	1	1	1	1	1	1	1	1	1
group_4036		hypothetical protein	172	172	1	11	4062				176	176	176		1	1	1	1	1	1	1	1	1	1	1	1	1	1	1	1	1	1	1	1	1	1	1	1	1	1	1	1	1	1	1	1	1	1	1
pdhB		Pyruvate dehydrogenase E1 component subunit beta	172	172	1	11	3995				977	977	977		1	1	1	1	1	1	1	1	1	1	1	1	1	1	1	1	1	1	1	1	1	1	1	1	1	1	1	1	1	1	1	1	1	1	1
cspLA		Cold shock-like protein CspLA	172	172	1	11	4937				200	200	200		1	1	1	1	1	1	1	1	1	1	1	1	1	1	1	1	1	1	1	1	1	1	1	1	1	1	1	1	1	1	1	1	1	1	1
group_4039		hypothetical protein	172	172	1	11	2695				464	464	464		1	1	1	1	1	1	1	1	1	1	1	1	1	1	1	1	1	1	1	1	1	1	1	1	1	1	1	1	1	1	1	1	1	1	1
rpsR		30S ribosomal protein S18	172	172	1	11	4452				242	242	242		1	1	1	1	1	1	1	1	1	1	1	1	1	1	1	1	1	1	1	1	1	1	1	1	1	1	1	1	1	1	1	1	1	1	1
group_4041		hypothetical protein	172	172	1	11	4166				152	152	152		1	1	1	1	1	1	1	1	1	1	1	1	1	1	1	1	1	1	1	1	1	1	1	1	1	1	1	1	1	1	1	1	1	1	1
ytpP		Thioredoxin-like protein YtpP	172	172	1	11	2855				311	311	311		1	1	1	1	1	1	1	1	1	1	1	1	1	1	1	1	1	1	1	1	1	1	1	1	1	1	1	1	1	1	1	1	1	1	1
mnhG1		Na(+)/H(+) antiporter subunit G1	172	172	1	11	4151				356	356	356		1	1	1	1	1	1	1	1	1	1	1	1	1	1	1	1	1	1	1	1	1	1	1	1	1	1	1	1	1	1	1	1	1	1	1
group_4044		putative N-acetyltransferase	172	172	1	11	3885				440	440	440		1	1	1	1	1	1	1	1	1	1	1	1	1	1	1	1	1	1	1	1	1	1	1	1	1	1	1	1	1	1	1	1	1	1	1
nadK		NAD kinase	172	172	1	11	4085				809	809	809		1	1	1	1	1	1	1	1	1	1	1	1	1	1	1	1	1	1	1	1	1	1	1	1	1	1	1	1	1	1	1	1	1	1	1
yidC		Membrane protein insertase YidC	172	172	1	11	3859				872	872	872		1	1	1	1	1	1	1	1	1	1	1	1	1	1	1	1	1	1	1	1	1	1	1	1	1	1	1	1	1	1	1	1	1	1	1
hup		DNA-binding protein HU	172	172	1	11	3279				272	272	272		1	1	1	1	1	1	1	1	1	1	1	1	1	1	1	1	1	1	1	1	1	1	1	1	1	1	1	1	1	1	1	1	1	1	1
nupC_2		Nucleoside permease NupC	172	172	1	11	994				1214	1214	1214		1	1	1	1	1	1	1	1	1	1	1	1	1	1	1	1	1	1	1	1	1	1	1	1	1	1	1	1	1	1	1	1	1	1	1
group_4049		hypothetical protein	172	172	1	11	1395				314	314	314		1	1	1	1	1	1	1	1	1	1	1	1	1	1	1	1	1	1	1	1	1	1	1	1	1	1	1	1	1	1	1	1	1	1	1
ureE		Urease accessory protein UreE	172	172	1	11	170				452	452	452		1	1	1	1	1	1	1	1	1	1	1	1	1	1	1	1	1	1	1	1	1	1	1	1	1	1	1	1	1	1	1	1	1	1	1
group_4055		Putative peptidyl-prolyl cis-trans isomerase	172	172	1	11	4143				593	593	593		1	1	1	1	1	1	1	1	1	1	1	1	1	1	1	1	1	1	1	1	1	1	1	1	1	1	1	1	1	1	1	1	1	1	1
murD		UDP-N-acetylmuramoylalanine--D-glutamate ligase	172	172	1	11	3878				1349	1349	1349		1	1	1	1	1	1	1	1	1	1	1	1	1	1	1	1	1	1	1	1	1	1	1	1	1	1	1	1	1	1	1	1	1	1	1
mraY		Phospho-N-acetylmuramoyl-pentapeptide-transferase	172	172	1	11	3879				965	965	965		1	1	1	1	1	1	1	1	1	1	1	1	1	1	1	1	1	1	1	1	1	1	1	1	1	1	1	1	1	1	1	1	1	1	1
group_4058		hypothetical protein	172	172	1	11	3892				1556	1556	1556		1	1	1	1	1	1	1	1	1	1	1	1	1	1	1	1	1	1	1	1	1	1	1	1	1	1	1	1	1	1	1	1	1	1	1
ythA		Putative cytochrome bd menaquinol oxidase subunit I	172	172	1	11	4003				1361	1361	1361		1	1	1	1	1	1	1	1	1	1	1	1	1	1	1	1	1	1	1	1	1	1	1	1	1	1	1	1	1	1	1	1	1	1	1
pdxK		Pyridoxine kinase	172	177	1.03	11	1116				830	830	830		1	1	1	1	1	1	1	1	1	1	1	1	1	1	1	1	1	1	1	1	1	1	1	1	1	1	1	1	1	1	1	1	1	1	1
group_4066		hypothetical protein	172	172	1	11	4703				644	644	644		1	1	1	1	1	1	1	1	1	1	1	1	1	1	1	1	1	1	1	1	1	1	1	1	1	1	1	1	1	1	1	1	1	1	1
nupG		Purine nucleoside transport protein NupG	172	172	1	11	1260				1229	1229	1229		1	1	1	1	1	1	1	1	1	1	1	1	1	1	1	1	1	1	1	1	1	1	1	1	1	1	1	1	1	1	1	1	1	1	1
group_4068		hypothetical protein	172	172	1	11	4069				800	803	802		1	1	1	1	1	1	1	1	1	1	1	1	1	1	1	1	1	1	1	1	1	1	1	1	1	1	1	1	1	1	1	1	1	1	1
group_4069		hypothetical protein	172	172	1	11	4189				1307	1307	1307		1	1	1	1	1	1	1	1	1	1	1	1	1	1	1	1	1	1	1	1	1	1	1	1	1	1	1	1	1	1	1	1	1	1	1
thyA		Thymidylate synthase	172	172	1	11	3332				956	956	956		1	1	1	1	1	1	1	1	1	1	1	1	1	1	1	1	1	1	1	1	1	1	1	1	1	1	1	1	1	1	1	1	1	1	1
group_4072		hypothetical protein	172	172	1	11	1985				1199	1199	1199		1	1	1	1	1	1	1	1	1	1	1	1	1	1	1	1	1	1	1	1	1	1	1	1	1	1	1	1	1	1	1	1	1	1	1
tagH_2		Teichoic acids export ATP-binding protein TagH	172	172	1	11	1253				794	794	794		1	1	1	1	1	1	1	1	1	1	1	1	1	1	1	1	1	1	1	1	1	1	1	1	1	1	1	1	1	1	1	1	1	1	1
korA		2-oxoglutarate oxidoreductase subunit KorA	172	172	1	11	3501				1760	1760	1760		1	1	1	1	1	1	1	1	1	1	1	1	1	1	1	1	1	1	1	1	1	1	1	1	1	1	1	1	1	1	1	1	1	1	1
group_4076		hypothetical protein	172	172	1	11	4176				848	848	848		1	1	1	1	1	1	1	1	1	1	1	1	1	1	1	1	1	1	1	1	1	1	1	1	1	1	1	1	1	1	1	1	1	1	1
rsmH		Ribosomal RNA small subunit methyltransferase H	172	172	1	11	3882				935	935	935		1	1	1	1	1	1	1	1	1	1	1	1	1	1	1	1	1	1	1	1	1	1	1	1	1	1	1	1	1	1	1	1	1	1	1
rex		Redox-sensing transcriptional repressor Rex	172	172	1	11	1467				635	635	635		1	1	1	1	1	1	1	1	1	1	1	1	1	1	1	1	1	1	1	1	1	1	1	1	1	1	1	1	1	1	1	1	1	1	1
pgcA		Phosphoglucomutase	172	172	1	11	5240				1637	1637	1637		1	1	1	1	1	1	1	1	1	1	1	1	1	1	1	1	1	1	1	1	1	1	1	1	1	1	1	1	1	1	1	1	1	1	1
sdhA		L-serine dehydratase, alpha chain	172	172	1	11	5152				899	899	899		1	1	1	1	1	1	1	1	1	1	1	1	1	1	1	1	1	1	1	1	1	1	1	1	1	1	1	1	1	1	1	1	1	1	1
rpsD		30S ribosomal protein S4	172	172	1	11	2883				602	602	602		1	1	1	1	1	1	1	1	1	1	1	1	1	1	1	1	1	1	1	1	1	1	1	1	1	1	1	1	1	1	1	1	1	1	1
uvrC		UvrABC system protein C	172	172	1	11	3938				1781	1781	1781		1	1	1	1	1	1	1	1	1	1	1	1	1	1	1	1	1	1	1	1	1	1	1	1	1	1	1	1	1	1	1	1	1	1	1
mntB_2		Manganese transport system membrane protein MntB	172	172	1	11	1248				836	836	836		1	1	1	1	1	1	1	1	1	1	1	1	1	1	1	1	1	1	1	1	1	1	1	1	1	1	1	1	1	1	1	1	1	1	1
group_409		hypothetical protein	172	214	1.25	11	3330				191	1124	904		1	1	1	1	1	1	1	1	1	1	1	1	1	1	1	1	1	1	1	1	1	1	1	1	1	1	1	1	1	1	1	1	1	1	1
mro		Aldose 1-epimerase	172	172	1	11	5845				1019	1019	1019		1	1	1	1	1	1	1	1	1	1	1	1	1	1	1	1	1	1	1	1	1	1	1	1	1	1	1	1	1	1	1	1	1	1	1
group_4092		hypothetical protein	172	172	1	11	3374				926	926	926		1	1	1	1	1	1	1	1	1	1	1	1	1	1	1	1	1	1	1	1	1	1	1	1	1	1	1	1	1	1	1	1	1	1	1
fabF		3-oxoacyl-[acyl-carrier-protein] synthase 2	172	172	1	11	4111				1244	1244	1244		1	1	1	1	1	1	1	1	1	1	1	1	1	1	1	1	1	1	1	1	1	1	1	1	1	1	1	1	1	1	1	1	1	1	1
ctsR		Transcriptional regulator CtsR	172	172	1	11	995				470	470	470		1	1	1	1	1	1	1	1	1	1	1	1	1	1	1	1	1	1	1	1	1	1	1	1	1	1	1	1	1	1	1	1	1	1	1
polC		DNA polymerase III PolC-type	172	172	1	11	3677				4316	4316	4316		1	1	1	1	1	1	1	1	1	1	1	1	1	1	1	1	1	1	1	1	1	1	1	1	1	1	1	1	1	1	1	1	1	1	1
femX		Lipid II:glycine glycyltransferase	172	172	1	11	142				1265	1265	1265		1	1	1	1	1	1	1	1	1	1	1	1	1	1	1	1	1	1	1	1	1	1	1	1	1	1	1	1	1	1	1	1	1	1	1
garK_2		Glycerate 2-kinase	172	172	1	11	1400				1124	1124	1124		1	1	1	1	1	1	1	1	1	1	1	1	1	1	1	1	1	1	1	1	1	1	1	1	1	1	1	1	1	1	1	1	1	1	1
group_4100		hypothetical protein	172	172	1	11	3806			Hypothetical protein with no hits to refseq/uniprot/clusters/cdd/tigrfams/pfam overlapping another protein with hits	1373	1373	1373		1	1	1	1	1	1	1	1	1	1	1	1	1	1	1	1	1	1	1	1	1	1	1	1	1	1	1	1	1	1	1	1	1	1	1
group_4101		hypothetical protein	172	172	1	11	3280				572	572	572		1	1	1	1	1	1	1	1	1	1	1	1	1	1	1	1	1	1	1	1	1	1	1	1	1	1	1	1	1	1	1	1	1	1	1
rpsC		30S ribosomal protein S3	172	172	1	11	124				653	653	653		1	1	1	1	1	1	1	1	1	1	1	1	1	1	1	1	1	1	1	1	1	1	1	1	1	1	1	1	1	1	1	1	1	1	1
mnhB1		Na(+)/H(+) antiporter subunit B1	172	172	1	11	4146				428	428	428		1	1	1	1	1	1	1	1	1	1	1	1	1	1	1	1	1	1	1	1	1	1	1	1	1	1	1	1	1	1	1	1	1	1	1
group_4107		hypothetical protein	172	172	1	11	4009				1295	1295	1295		1	1	1	1	1	1	1	1	1	1	1	1	1	1	1	1	1	1	1	1	1	1	1	1	1	1	1	1	1	1	1	1	1	1	1
tagU_1		Polyisoprenyl-teichoic acid--peptidoglycan teichoic acid transferase TagU	172	172	1	11	5874				947	947	947		1	1	1	1	1	1	1	1	1	1	1	1	1	1	1	1	1	1	1	1	1	1	1	1	1	1	1	1	1	1	1	1	1	1	1
arcA		Arginine deiminase	172	172	1	11	5030				1235	1235	1235		1	1	1	1	1	1	1	1	1	1	1	1	1	1	1	1	1	1	1	1	1	1	1	1	1	1	1	1	1	1	1	1	1	1	1
group_4111		hypothetical protein	172	172	1	11	5612				191	191	191		1	1	1	1	1	1	1	1	1	1	1	1	1	1	1	1	1	1	1	1	1	1	1	1	1	1	1	1	1	1	1	1	1	1	1
radA		DNA repair protein RadA	172	172	1	11	999				1364	1364	1364		1	1	1	1	1	1	1	1	1	1	1	1	1	1	1	1	1	1	1	1	1	1	1	1	1	1	1	1	1	1	1	1	1	1	1
gltA		Glutamate synthase [NADPH] large chain	172	172	1	11	4326				4499	4499	4499		1	1	1	1	1	1	1	1	1	1	1	1	1	1	1	1	1	1	1	1	1	1	1	1	1	1	1	1	1	1	1	1	1	1	1
ybiT		putative ABC transporter ATP-binding protein YbiT	172	172	1	11	3371				1601	1601	1601		1	1	1	1	1	1	1	1	1	1	1	1	1	1	1	1	1	1	1	1	1	1	1	1	1	1	1	1	1	1	1	1	1	1	1
group_4118		hypothetical protein	172	172	1	11	3707				332	332	332		1	1	1	1	1	1	1	1	1	1	1	1	1	1	1	1	1	1	1	1	1	1	1	1	1	1	1	1	1	1	1	1	1	1	1
rpmJ		50S ribosomal protein L36	172	172	1	11	106				113	113	113		1	1	1	1	1	1	1	1	1	1	1	1	1	1	1	1	1	1	1	1	1	1	1	1	1	1	1	1	1	1	1	1	1	1	1
czrA		HTH-type transcriptional repressor CzrA	172	172	1	11	3802				320	320	320		1	1	1	1	1	1	1	1	1	1	1	1	1	1	1	1	1	1	1	1	1	1	1	1	1	1	1	1	1	1	1	1	1	1	1
group_4122		hypothetical protein	172	172	1	11	3680				782	782	782		1	1	1	1	1	1	1	1	1	1	1	1	1	1	1	1	1	1	1	1	1	1	1	1	1	1	1	1	1	1	1	1	1	1	1
dnaA		Chromosomal replication initiator protein DnaA	172	172	1	11	4924				1361	1361	1361		1	1	1	1	1	1	1	1	1	1	1	1	1	1	1	1	1	1	1	1	1	1	1	1	1	1	1	1	1	1	1	1	1	1	1
pnp_1		Polyribonucleotide nucleotidyltransferase	172	172	1	11	3667				2096	2096	2096		1	1	1	1	1	1	1	1	1	1	1	1	1	1	1	1	1	1	1	1	1	1	1	1	1	1	1	1	1	1	1	1	1	1	1
sdhC		Succinate dehydrogenase cytochrome b558 subunit	172	172	1	11	3937				614	614	614		1	1	1	1	1	1	1	1	1	1	1	1	1	1	1	1	1	1	1	1	1	1	1	1	1	1	1	1	1	1	1	1	1	1	1
sbnI		L-serine kinase SbnI	172	172	1	11	4792				764	764	764		1	1	1	1	1	1	1	1	1	1	1	1	1	1	1	1	1	1	1	1	1	1	1	1	1	1	1	1	1	1	1	1	1	1	1
menB		1,4-dihydroxy-2-naphthoyl-CoA synthase	172	172	1	11	4047				821	821	821		1	1	1	1	1	1	1	1	1	1	1	1	1	1	1	1	1	1	1	1	1	1	1	1	1	1	1	1	1	1	1	1	1	1	1
secA1_2		Protein translocase subunit SecA 1	172	172	1	11	1411				2531	2531	2531		1	1	1	1	1	1	1	1	1	1	1	1	1	1	1	1	1	1	1	1	1	1	1	1	1	1	1	1	1	1	1	1	1	1	1
iscS_1		Cysteine desulfurase IscS	172	172	1	11	3081				1142	1142	1142		1	1	1	1	1	1	1	1	1	1	1	1	1	1	1	1	1	1	1	1	1	1	1	1	1	1	1	1	1	1	1	1	1	1	1
prfB		Peptide chain release factor 2	172	172	1	11	1412				992	992	992		1	1	1	1	1	1	1	1	1	1	1	1	1	1	1	1	1	1	1	1	1	1	1	1	1	1	1	1	1	1	1	1	1	1	1
group_4133		hypothetical protein	172	172	1	11	5171				770	770	770		1	1	1	1	1	1	1	1	1	1	1	1	1	1	1	1	1	1	1	1	1	1	1	1	1	1	1	1	1	1	1	1	1	1	1
relA		GTP pyrophosphokinase	172	172	1	11	3070				2210	2210	2210		1	1	1	1	1	1	1	1	1	1	1	1	1	1	1	1	1	1	1	1	1	1	1	1	1	1	1	1	1	1	1	1	1	1	1
topA		DNA topoisomerase 1	172	172	1	11	3691				2075	2075	2075		1	1	1	1	1	1	1	1	1	1	1	1	1	1	1	1	1	1	1	1	1	1	1	1	1	1	1	1	1	1	1	1	1	1	1
group_4138		hypothetical protein	172	172	1	11	3818				860	860	860		1	1	1	1	1	1	1	1	1	1	1	1	1	1	1	1	1	1	1	1	1	1	1	1	1	1	1	1	1	1	1	1	1	1	1
cysK		Cysteine synthase	172	172	1	12	20				932	932	932		1	1	1	1	1	1	1	1	1	1	1	1	1	1	1	1	1	1	1	1	1	1	1	1	1	1	1	1	1	1	1	1	1	1	1
gluP		Rhomboid protease GluP	172	172	1	11	3153				1463	1463	1463		1	1	1	1	1	1	1	1	1	1	1	1	1	1	1	1	1	1	1	1	1	1	1	1	1	1	1	1	1	1	1	1	1	1	1
glcK		Glucokinase	172	172	1	11	3154				986	986	986		1	1	1	1	1	1	1	1	1	1	1	1	1	1	1	1	1	1	1	1	1	1	1	1	1	1	1	1	1	1	1	1	1	1	1
pyrD		Dihydroorotate dehydrogenase (quinone)	172	172	1	11	5085				1064	1064	1064		1	1	1	1	1	1	1	1	1	1	1	1	1	1	1	1	1	1	1	1	1	1	1	1	1	1	1	1	1	1	1	1	1	1	1
mqo1		putative malate:quinone oxidoreductase 1	172	172	1	11	5813				1478	1478	1478		1	1	1	1	1	1	1	1	1	1	1	1	1	1	1	1	1	1	1	1	1	1	1	1	1	1	1	1	1	1	1	1	1	1	1
butA		Diacetyl reductase [(S)-acetoin forming]	172	172	1	11	4789				776	776	776		1	1	1	1	1	1	1	1	1	1	1	1	1	1	1	1	1	1	1	1	1	1	1	1	1	1	1	1	1	1	1	1	1	1	1
kapB		Kinase-associated lipoprotein B	172	172	1	11	4144				383	383	383		1	1	1	1	1	1	1	1	1	1	1	1	1	1	1	1	1	1	1	1	1	1	1	1	1	1	1	1	1	1	1	1	1	1	1
uvrB_2		UvrABC system protein B	172	172	1	11	1416				1985	1985	1985		1	1	1	1	1	1	1	1	1	1	1	1	1	1	1	1	1	1	1	1	1	1	1	1	1	1	1	1	1	1	1	1	1	1	1
dnaK		Chaperone protein DnaK	172	172	1	11	3122				1832	1832	1832		1	1	1	1	1	1	1	1	1	1	1	1	1	1	1	1	1	1	1	1	1	1	1	1	1	1	1	1	1	1	1	1	1	1	1
gdpP		Cyclic-di-AMP phosphodiesterase GdpP	172	172	1	11	4911				1967	1967	1967		1	1	1	1	1	1	1	1	1	1	1	1	1	1	1	1	1	1	1	1	1	1	1	1	1	1	1	1	1	1	1	1	1	1	1
group_4155		hypothetical protein	172	172	1	11	4783				1238	1238	1238		1	1	1	1	1	1	1	1	1	1	1	1	1	1	1	1	1	1	1	1	1	1	1	1	1	1	1	1	1	1	1	1	1	1	1
hit		Protein hit	172	172	1	11	2705				422	422	422		1	1	1	1	1	1	1	1	1	1	1	1	1	1	1	1	1	1	1	1	1	1	1	1	1	1	1	1	1	1	1	1	1	1	1
mutS_1		DNA mismatch repair protein MutS	172	172	1	11	3495				2618	2618	2618		1	1	1	1	1	1	1	1	1	1	1	1	1	1	1	1	1	1	1	1	1	1	1	1	1	1	1	1	1	1	1	1	1	1	1
mreC		Cell shape-determining protein MreC	172	172	1	11	3055				842	842	842		1	1	1	1	1	1	1	1	1	1	1	1	1	1	1	1	1	1	1	1	1	1	1	1	1	1	1	1	1	1	1	1	1	1	1
hsdR		Type-1 restriction enzyme R protein	172	172	1	11	4683				2789	2789	2789		1	1	1	1	1	1	1	1	1	1	1	1	1	1	1	1	1	1	1	1	1	1	1	1	1	1	1	1	1	1	1	1	1	1	1
dnaI		Primosomal protein DnaI	172	172	1	11	3029				920	920	920		1	1	1	1	1	1	1	1	1	1	1	1	1	1	1	1	1	1	1	1	1	1	1	1	1	1	1	1	1	1	1	1	1	1	1
ybbH_2		putative HTH-type transcriptional regulator YbbH	172	172	1	11	4517				800	800	800		1	1	1	1	1	1	1	1	1	1	1	1	1	1	1	1	1	1	1	1	1	1	1	1	1	1	1	1	1	1	1	1	1	1	1
yacL		putative PIN and TRAM-domain containing protein YacL	172	172	1	11	1000				1073	1073	1073		1	1	1	1	1	1	1	1	1	1	1	1	1	1	1	1	1	1	1	1	1	1	1	1	1	1	1	1	1	1	1	1	1	1	1
gbsA		Betaine aldehyde dehydrogenase	172	172	1	11	5058				1490	1490	1490		1	1	1	1	1	1	1	1	1	1	1	1	1	1	1	1	1	1	1	1	1	1	1	1	1	1	1	1	1	1	1	1	1	1	1
group_417		hypothetical protein	172	172	1	11	3301				341	344	341		1	1	1	1	1	1	1	1	1	1	1	1	1	1	1	1	1	1	1	1	1	1	1	1	1	1	1	1	1	1	1	1	1	1	1
dagK		Diacylglycerol kinase	172	172	1	11	1980				947	947	947		1	1	1	1	1	1	1	1	1	1	1	1	1	1	1	1	1	1	1	1	1	1	1	1	1	1	1	1	1	1	1	1	1	1	1
group_4171		hypothetical protein	172	172	1	11	4090				806	806	806		1	1	1	1	1	1	1	1	1	1	1	1	1	1	1	1	1	1	1	1	1	1	1	1	1	1	1	1	1	1	1	1	1	1	1
pepF1_1		Oligoendopeptidase F, plasmid	172	172	1	11	4092				1808	1808	1808		1	1	1	1	1	1	1	1	1	1	1	1	1	1	1	1	1	1	1	1	1	1	1	1	1	1	1	1	1	1	1	1	1	1	1
queE		7-carboxy-7-deazaguanine synthase	172	172	1	11	1367				713	713	713		1	1	1	1	1	1	1	1	1	1	1	1	1	1	1	1	1	1	1	1	1	1	1	1	1	1	1	1	1	1	1	1	1	1	1
group_4174		hypothetical protein	172	172	1	11	5830				920	920	920		1	1	1	1	1	1	1	1	1	1	1	1	1	1	1	1	1	1	1	1	1	1	1	1	1	1	1	1	1	1	1	1	1	1	1
garK_1		Glycerate 2-kinase	172	172	1	11	5670				1142	1142	1142		1	1	1	1	1	1	1	1	1	1	1	1	1	1	1	1	1	1	1	1	1	1	1	1	1	1	1	1	1	1	1	1	1	1	1
mntH_2		Divalent metal cation transporter MntH	172	172	1	11	3984				1352	1352	1352		1	1	1	1	1	1	1	1	1	1	1	1	1	1	1	1	1	1	1	1	1	1	1	1	1	1	1	1	1	1	1	1	1	1	1
group_418		hypothetical protein	172	172	1	11	3291				392	587	583		1	1	1	1	1	1	1	1	1	1	1	1	1	1	1	1	1	1	1	1	1	1	1	1	1	1	1	1	1	1	1	1	1	1	1
acnA		Aconitate hydratase A	172	172	1	11	3415				2705	2705	2705		1	1	1	1	1	1	1	1	1	1	1	1	1	1	1	1	1	1	1	1	1	1	1	1	1	1	1	1	1	1	1	1	1	1	1
group_4182		hypothetical protein	172	172	1	11	1923				542	542	542		1	1	1	1	1	1	1	1	1	1	1	1	1	1	1	1	1	1	1	1	1	1	1	1	1	1	1	1	1	1	1	1	1	1	1
gcvPA		putative glycine dehydrogenase (decarboxylating) subunit 1	172	172	1	11	3165				1346	1346	1346		1	1	1	1	1	1	1	1	1	1	1	1	1	1	1	1	1	1	1	1	1	1	1	1	1	1	1	1	1	1	1	1	1	1	1
cap8A_2		Capsular polysaccharide type 8 biosynthesis protein cap8A	172	172	1	11	4982				662	662	662		1	1	1	1	1	1	1	1	1	1	1	1	1	1	1	1	1	1	1	1	1	1	1	1	1	1	1	1	1	1	1	1	1	1	1
ythB		Putative cytochrome bd menaquinol oxidase subunit II	172	172	1	11	4002				1019	1019	1019		1	1	1	1	1	1	1	1	1	1	1	1	1	1	1	1	1	1	1	1	1	1	1	1	1	1	1	1	1	1	1	1	1	1	1
arcC1		Carbamate kinase 1	172	172	1	11	3893				935	935	935		1	1	1	1	1	1	1	1	1	1	1	1	1	1	1	1	1	1	1	1	1	1	1	1	1	1	1	1	1	1	1	1	1	1	1
gpmA_1		2,3-bisphosphoglycerate-dependent phosphoglycerate mutase	172	172	1	11	5691				686	686	686		1	1	1	1	1	1	1	1	1	1	1	1	1	1	1	1	1	1	1	1	1	1	1	1	1	1	1	1	1	1	1	1	1	1	1
ebpS		Elastin-binding protein EbpS	172	172	1	11	3272				1460	1463	1460		1	1	1	1	1	1	1	1	1	1	1	1	1	1	1	1	1	1	1	1	1	1	1	1	1	1	1	1	1	1	1	1	1	1	1
cntC		Metal-staphylopine import system permease protein CntC	172	172	1	11	5635				869	869	869		1	1	1	1	1	1	1	1	1	1	1	1	1	1	1	1	1	1	1	1	1	1	1	1	1	1	1	1	1	1	1	1	1	1	1
group_4195		Nucleotide-binding protein	172	172	1	11	1423				911	911	911		1	1	1	1	1	1	1	1	1	1	1	1	1	1	1	1	1	1	1	1	1	1	1	1	1	1	1	1	1	1	1	1	1	1	1
group_4196		putative tautomerase	172	172	1	11	3401				188	188	188		1	1	1	1	1	1	1	1	1	1	1	1	1	1	1	1	1	1	1	1	1	1	1	1	1	1	1	1	1	1	1	1	1	1	1
tagG		Teichoic acid translocation permease protein TagG	172	172	1	11	1254				812	812	812		1	1	1	1	1	1	1	1	1	1	1	1	1	1	1	1	1	1	1	1	1	1	1	1	1	1	1	1	1	1	1	1	1	1	1
mecA		Adapter protein MecA	172	172	1	11	4094				719	719	719		1	1	1	1	1	1	1	1	1	1	1	1	1	1	1	1	1	1	1	1	1	1	1	1	1	1	1	1	1	1	1	1	1	1	1
tal		Transaldolase	172	172	1	11	2814				713	713	713		1	1	1	1	1	1	1	1	1	1	1	1	1	1	1	1	1	1	1	1	1	1	1	1	1	1	1	1	1	1	1	1	1	1	1
rsfS		Ribosomal silencing factor RsfS	172	172	1	11	3110				353	353	353		1	1	1	1	1	1	1	1	1	1	1	1	1	1	1	1	1	1	1	1	1	1	1	1	1	1	1	1	1	1	1	1	1	1	1
cfiB		2-oxoglutarate carboxylase small subunit	172	172	1	11	3174				1355	1355	1355		1	1	1	1	1	1	1	1	1	1	1	1	1	1	1	1	1	1	1	1	1	1	1	1	1	1	1	1	1	1	1	1	1	1	1
rplY		50S ribosomal protein L25	172	172	1	12	33				653	653	653		1	1	1	1	1	1	1	1	1	1	1	1	1	1	1	1	1	1	1	1	1	1	1	1	1	1	1	1	1	1	1	1	1	1	1
slyA_1		Transcriptional regulator SlyA	172	172	1	11	4488				419	419	419		1	1	1	1	1	1	1	1	1	1	1	1	1	1	1	1	1	1	1	1	1	1	1	1	1	1	1	1	1	1	1	1	1	1	1
nusG		Transcription termination/antitermination protein NusG	172	172	1	11	1009				545	548	547		1	1	1	1	1	1	1	1	1	1	1	1	1	1	1	1	1	1	1	1	1	1	1	1	1	1	1	1	1	1	1	1	1	1	1
panB		3-methyl-2-oxobutanoate hydroxymethyltransferase	172	172	1	11	5073				818	818	818		1	1	1	1	1	1	1	1	1	1	1	1	1	1	1	1	1	1	1	1	1	1	1	1	1	1	1	1	1	1	1	1	1	1	1
group_4213		putative protein	172	172	1	11	1933				515	515	515		1	1	1	1	1	1	1	1	1	1	1	1	1	1	1	1	1	1	1	1	1	1	1	1	1	1	1	1	1	1	1	1	1	1	1
group_4215		hypothetical protein	172	172	1	11	1964				1217	1217	1217		1	1	1	1	1	1	1	1	1	1	1	1	1	1	1	1	1	1	1	1	1	1	1	1	1	1	1	1	1	1	1	1	1	1	1
brnQ_2		Branched-chain amino acid transport system 2 carrier protein	172	172	1	11	4696				1349	1355	1350		1	1	1	1	1	1	1	1	1	1	1	1	1	1	1	1	1	1	1	1	1	1	1	1	1	1	1	1	1	1	1	1	1	1	1
group_4217		hypothetical protein	172	172	1	11	3437				1280	1280	1280		1	1	1	1	1	1	1	1	1	1	1	1	1	1	1	1	1	1	1	1	1	1	1	1	1	1	1	1	1	1	1	1	1	1	1
group_4219		hypothetical protein	172	172	1	11	3170				581	581	581		1	1	1	1	1	1	1	1	1	1	1	1	1	1	1	1	1	1	1	1	1	1	1	1	1	1	1	1	1	1	1	1	1	1	1
group_4221		hypothetical protein	172	172	1	11	4065				569	569	569		1	1	1	1	1	1	1	1	1	1	1	1	1	1	1	1	1	1	1	1	1	1	1	1	1	1	1	1	1	1	1	1	1	1	1
group_4222		hypothetical protein	172	172	1	11	3963				557	557	557		1	1	1	1	1	1	1	1	1	1	1	1	1	1	1	1	1	1	1	1	1	1	1	1	1	1	1	1	1	1	1	1	1	1	1
pgk		Phosphoglycerate kinase	172	172	1	11	1432				1190	1190	1190		1	1	1	1	1	1	1	1	1	1	1	1	1	1	1	1	1	1	1	1	1	1	1	1	1	1	1	1	1	1	1	1	1	1	1
gapA1		Glyceraldehyde-3-phosphate dehydrogenase 1	172	172	1	11	1431				1010	1010	1010		1	1	1	1	1	1	1	1	1	1	1	1	1	1	1	1	1	1	1	1	1	1	1	1	1	1	1	1	1	1	1	1	1	1	1
rplT		50S ribosomal protein L20	172	172	1	11	3034				356	356	356		1	1	1	1	1	1	1	1	1	1	1	1	1	1	1	1	1	1	1	1	1	1	1	1	1	1	1	1	1	1	1	1	1	1	1
kefB		Glutathione-regulated potassium-efflux system protein KefB	172	172	1	11	4082				1844	1844	1844		1	1	1	1	1	1	1	1	1	1	1	1	1	1	1	1	1	1	1	1	1	1	1	1	1	1	1	1	1	1	1	1	1	1	1
group_4228		hypothetical protein	172	172	1	11	5625				422	422	422		1	1	1	1	1	1	1	1	1	1	1	1	1	1	1	1	1	1	1	1	1	1	1	1	1	1	1	1	1	1	1	1	1	1	1
group_423		hypothetical protein	172	172	1	11	3764				1508	1583	1581		1	1	1	1	1	1	1	1	1	1	1	1	1	1	1	1	1	1	1	1	1	1	1	1	1	1	1	1	1	1	1	1	1	1	1
hemL2		Glutamate-1-semialdehyde 2,1-aminomutase 2	172	172	1	11	1920				1289	1289	1289		1	1	1	1	1	1	1	1	1	1	1	1	1	1	1	1	1	1	1	1	1	1	1	1	1	1	1	1	1	1	1	1	1	1	1
group_4233		Putative TrmH family tRNA/rRNA methyltransferase	172	172	1	11	1005				746	746	746		1	1	1	1	1	1	1	1	1	1	1	1	1	1	1	1	1	1	1	1	1	1	1	1	1	1	1	1	1	1	1	1	1	1	1
rnz		Ribonuclease Z	172	172	1	11	3199				920	920	920		1	1	1	1	1	1	1	1	1	1	1	1	1	1	1	1	1	1	1	1	1	1	1	1	1	1	1	1	1	1	1	1	1	1	1
group_4238		hypothetical protein	172	172	1	11	1936				530	530	530		1	1	1	1	1	1	1	1	1	1	1	1	1	1	1	1	1	1	1	1	1	1	1	1	1	1	1	1	1	1	1	1	1	1	1
rpsE		30S ribosomal protein S5	172	172	1	11	112				500	500	500		1	1	1	1	1	1	1	1	1	1	1	1	1	1	1	1	1	1	1	1	1	1	1	1	1	1	1	1	1	1	1	1	1	1	1
potA		Spermidine/putrescine import ATP-binding protein PotA	172	172	1	11	3990				1094	1094	1094		1	1	1	1	1	1	1	1	1	1	1	1	1	1	1	1	1	1	1	1	1	1	1	1	1	1	1	1	1	1	1	1	1	1	1
recU		Holliday junction resolvase RecU	172	172	1	11	3303				626	626	626		1	1	1	1	1	1	1	1	1	1	1	1	1	1	1	1	1	1	1	1	1	1	1	1	1	1	1	1	1	1	1	1	1	1	1
eno		Enolase	172	172	1	11	1435				1304	1304	1304		1	1	1	1	1	1	1	1	1	1	1	1	1	1	1	1	1	1	1	1	1	1	1	1	1	1	1	1	1	1	1	1	1	1	1
group_4245		hypothetical protein	172	172	1	11	4339				1337	1337	1337		1	1	1	1	1	1	1	1	1	1	1	1	1	1	1	1	1	1	1	1	1	1	1	1	1	1	1	1	1	1	1	1	1	1	1
hpt		Hypoxanthine-guanine phosphoribosyltransferase	172	172	1	12	23				539	539	539		1	1	1	1	1	1	1	1	1	1	1	1	1	1	1	1	1	1	1	1	1	1	1	1	1	1	1	1	1	1	1	1	1	1	1
tadA_2		tRNA-specific adenosine deaminase	172	177	1.03	11	1032				470	470	470		1	1	1	1	1	1	1	1	1	1	1	1	1	1	1	1	1	1	1	1	1	1	1	1	1	1	1	1	1	1	1	1	1	1	1
dgkA		Undecaprenol kinase	172	172	1	11	3133				344	344	344		1	1	1	1	1	1	1	1	1	1	1	1	1	1	1	1	1	1	1	1	1	1	1	1	1	1	1	1	1	1	1	1	1	1	1
lspA		Lipoprotein signal peptidase	172	172	1	11	3749				491	491	491		1	1	1	1	1	1	1	1	1	1	1	1	1	1	1	1	1	1	1	1	1	1	1	1	1	1	1	1	1	1	1	1	1	1	1
IMPDH		Inosine-5'-monophosphate dehydrogenase	172	172	1	11	3009				1298	1298	1298		1	1	1	1	1	1	1	1	1	1	1	1	1	1	1	1	1	1	1	1	1	1	1	1	1	1	1	1	1	1	1	1	1	1	1
thiI		putative tRNA sulfurtransferase	172	172	1	11	2996				323	1223	1213		1	1	1	1	1	1	1	1	1	1	1	1	1	1	1	1	1	1	1	1	1	1	1	1	1	1	1	1	1	1	1	1	1	1	1
murB		UDP-N-acetylenolpyruvoylglucosamine reductase	172	172	1	11	1396				923	923	923		1	1	1	1	1	1	1	1	1	1	1	1	1	1	1	1	1	1	1	1	1	1	1	1	1	1	1	1	1	1	1	1	1	1	1
rlmH		Ribosomal RNA large subunit methyltransferase H	172	172	1	11	4900				479	479	479		1	1	1	1	1	1	1	1	1	1	1	1	1	1	1	1	1	1	1	1	1	1	1	1	1	1	1	1	1	1	1	1	1	1	1
pgsA		CDP-diacylglycerol--glycerol-3-phosphate 3-phosphatidyltransferase	172	172	1	11	3507				578	578	578		1	1	1	1	1	1	1	1	1	1	1	1	1	1	1	1	1	1	1	1	1	1	1	1	1	1	1	1	1	1	1	1	1	1	1
group_4265		hypothetical protein	172	172	1	11	3508				392	392	392		1	1	1	1	1	1	1	1	1	1	1	1	1	1	1	1	1	1	1	1	1	1	1	1	1	1	1	1	1	1	1	1	1	1	1
rplW		50S ribosomal protein L23	172	172	1	11	128				275	275	275		1	1	1	1	1	1	1	1	1	1	1	1	1	1	1	1	1	1	1	1	1	1	1	1	1	1	1	1	1	1	1	1	1	1	1
xseA		Exodeoxyribonuclease 7 large subunit	172	172	1	11	3177				1337	1337	1337		1	1	1	1	1	1	1	1	1	1	1	1	1	1	1	1	1	1	1	1	1	1	1	1	1	1	1	1	1	1	1	1	1	1	1
rpsH		30S ribosomal protein S8	172	172	1	11	115				398	398	398		1	1	1	1	1	1	1	1	1	1	1	1	1	1	1	1	1	1	1	1	1	1	1	1	1	1	1	1	1	1	1	1	1	1	1
ansA		putative L-asparaginase	172	172	1	11	3274				968	968	968		1	1	1	1	1	1	1	1	1	1	1	1	1	1	1	1	1	1	1	1	1	1	1	1	1	1	1	1	1	1	1	1	1	1	1
arcR		HTH-type transcriptional regulator ArcR	172	172	1	11	5034				704	704	704		1	1	1	1	1	1	1	1	1	1	1	1	1	1	1	1	1	1	1	1	1	1	1	1	1	1	1	1	1	1	1	1	1	1	1
mnmE		tRNA modification GTPase MnmE	172	172	1	11	4927				1379	1379	1379		1	1	1	1	1	1	1	1	1	1	1	1	1	1	1	1	1	1	1	1	1	1	1	1	1	1	1	1	1	1	1	1	1	1	1
atl_2		Bifunctional autolysin	172	172	1	11	5878				776	776	776		1	1	1	1	1	1	1	1	1	1	1	1	1	1	1	1	1	1	1	1	1	1	1	1	1	1	1	1	1	1	1	1	1	1	1
fecD		Fe(3+) dicitrate transport system permease protein FecD	172	172	1	11	47				968	968	968		1	1	1	1	1	1	1	1	1	1	1	1	1	1	1	1	1	1	1	1	1	1	1	1	1	1	1	1	1	1	1	1	1	1	1
ltaS		Lipoteichoic acid synthase	172	172	1	11	1375				1940	1940	1940		1	1	1	1	1	1	1	1	1	1	1	1	1	1	1	1	1	1	1	1	1	1	1	1	1	1	1	1	1	1	1	1	1	1	1
group_4282		hypothetical protein	172	172	1	11	3130				698	698	698		1	1	1	1	1	1	1	1	1	1	1	1	1	1	1	1	1	1	1	1	1	1	1	1	1	1	1	1	1	1	1	1	1	1	1
group_4284		putative protein	172	172	1	11	4128				902	902	902		1	1	1	1	1	1	1	1	1	1	1	1	1	1	1	1	1	1	1	1	1	1	1	1	1	1	1	1	1	1	1	1	1	1	1
nfo		putative endonuclease 4	172	172	1	11	3145				890	890	890		1	1	1	1	1	1	1	1	1	1	1	1	1	1	1	1	1	1	1	1	1	1	1	1	1	1	1	1	1	1	1	1	1	1	1
ywaC		GTP pyrophosphokinase YwaC	172	172	1	11	5178				692	692	692		1	1	1	1	1	1	1	1	1	1	1	1	1	1	1	1	1	1	1	1	1	1	1	1	1	1	1	1	1	1	1	1	1	1	1
clpB		Chaperone protein ClpB	172	172	1	11	4122				2609	2609	2609		1	1	1	1	1	1	1	1	1	1	1	1	1	1	1	1	1	1	1	1	1	1	1	1	1	1	1	1	1	1	1	1	1	1	1
group_4290		putative sensor-like histidine kinase	172	172	1	11	4654				1556	1556	1556		1	1	1	1	1	1	1	1	1	1	1	1	1	1	1	1	1	1	1	1	1	1	1	1	1	1	1	1	1	1	1	1	1	1	1
mnmG		tRNA uridine 5-carboxymethylaminomethyl modification enzyme MnmG	172	172	1	11	4928				1877	1877	1877		1	1	1	1	1	1	1	1	1	1	1	1	1	1	1	1	1	1	1	1	1	1	1	1	1	1	1	1	1	1	1	1	1	1	1
tsf		Elongation factor Ts	172	172	1	11	3684				881	881	881		1	1	1	1	1	1	1	1	1	1	1	1	1	1	1	1	1	1	1	1	1	1	1	1	1	1	1	1	1	1	1	1	1	1	1
pbuG		Guanine/hypoxanthine permease PbuG	172	172	1	11	133				1334	1334	1334		1	1	1	1	1	1	1	1	1	1	1	1	1	1	1	1	1	1	1	1	1	1	1	1	1	1	1	1	1	1	1	1	1	1	1
ytrA		HTH-type transcriptional repressor YtrA	172	172	1	11	2019				380	380	380		1	1	1	1	1	1	1	1	1	1	1	1	1	1	1	1	1	1	1	1	1	1	1	1	1	1	1	1	1	1	1	1	1	1	1
greA		Transcription elongation factor GreA	172	172	1	11	3093				476	476	476		1	1	1	1	1	1	1	1	1	1	1	1	1	1	1	1	1	1	1	1	1	1	1	1	1	1	1	1	1	1	1	1	1	1	1
cymR		HTH-type transcriptional regulator CymR	172	172	1	11	3077				422	422	422		1	1	1	1	1	1	1	1	1	1	1	1	1	1	1	1	1	1	1	1	1	1	1	1	1	1	1	1	1	1	1	1	1	1	1
sspP		Staphopain A	172	172	1	11	1991				716	1166	1160		1	1	1	1	1	1	1	1	1	1	1	1	1	1	1	1	1	1	1	1	1	1	1	1	1	1	1	1	1	1	1	1	1	1	1
rplB		50S ribosomal protein L2	172	172	1	11	127				833	833	833		1	1	1	1	1	1	1	1	1	1	1	1	1	1	1	1	1	1	1	1	1	1	1	1	1	1	1	1	1	1	1	1	1	1	1
pfkA		ATP-dependent 6-phosphofructokinase	172	172	1	11	3015				968	968	968		1	1	1	1	1	1	1	1	1	1	1	1	1	1	1	1	1	1	1	1	1	1	1	1	1	1	1	1	1	1	1	1	1	1	1
accA		Acetyl-coenzyme A carboxylase carboxyl transferase subunit alpha	172	172	1	11	3014				944	944	944		1	1	1	1	1	1	1	1	1	1	1	1	1	1	1	1	1	1	1	1	1	1	1	1	1	1	1	1	1	1	1	1	1	1	1
group_4309		hypothetical protein	172	172	1	11	5173				611	611	611		1	1	1	1	1	1	1	1	1	1	1	1	1	1	1	1	1	1	1	1	1	1	1	1	1	1	1	1	1	1	1	1	1	1	1
ruvB_2		Holliday junction ATP-dependent DNA helicase RuvB	172	172	1	11	4320				1697	1697	1697		1	1	1	1	1	1	1	1	1	1	1	1	1	1	1	1	1	1	1	1	1	1	1	1	1	1	1	1	1	1	1	1	1	1	1
ribF		Bifunctional riboflavin kinase/FMN adenylyltransferase	172	172	1	11	3669				971	971	971		1	1	1	1	1	1	1	1	1	1	1	1	1	1	1	1	1	1	1	1	1	1	1	1	1	1	1	1	1	1	1	1	1	1	1
rplA		50S ribosomal protein L1	172	172	1	11	1011				689	692	691		1	1	1	1	1	1	1	1	1	1	1	1	1	1	1	1	1	1	1	1	1	1	1	1	1	1	1	1	1	1	1	1	1	1	1
yclM		Aspartokinase 3	172	172	1	11	3438				1382	1382	1382		1	1	1	1	1	1	1	1	1	1	1	1	1	1	1	1	1	1	1	1	1	1	1	1	1	1	1	1	1	1	1	1	1	1	1
fmt		Methionyl-tRNA formyltransferase	172	172	1	11	3727				935	935	935		1	1	1	1	1	1	1	1	1	1	1	1	1	1	1	1	1	1	1	1	1	1	1	1	1	1	1	1	1	1	1	1	1	1	1
pxpC_2		5-oxoprolinase subunit C	172	172	1	11	1374				1004	1004	1004		1	1	1	1	1	1	1	1	1	1	1	1	1	1	1	1	1	1	1	1	1	1	1	1	1	1	1	1	1	1	1	1	1	1	1
group_4318		hypothetical protein	172	172	1	11	3035				608	608	608		1	1	1	1	1	1	1	1	1	1	1	1	1	1	1	1	1	1	1	1	1	1	1	1	1	1	1	1	1	1	1	1	1	1	1
yqfL		Putative pyruvate, phosphate dikinase regulatory protein	172	172	1	11	3139				818	818	818		1	1	1	1	1	1	1	1	1	1	1	1	1	1	1	1	1	1	1	1	1	1	1	1	1	1	1	1	1	1	1	1	1	1	1
sbnA		N-(2-amino-2-carboxyethyl)-L-glutamate synthase	172	172	1	11	4801				980	980	980		1	1	1	1	1	1	1	1	1	1	1	1	1	1	1	1	1	1	1	1	1	1	1	1	1	1	1	1	1	1	1	1	1	1	1
cycA_2		D-serine/D-alanine/glycine transporter	172	172	1	11	5664				1409	1409	1409		1	1	1	1	1	1	1	1	1	1	1	1	1	1	1	1	1	1	1	1	1	1	1	1	1	1	1	1	1	1	1	1	1	1	1
trmR		tRNA 5-hydroxyuridine methyltransferase	172	172	1	11	3089				638	638	638		1	1	1	1	1	1	1	1	1	1	1	1	1	1	1	1	1	1	1	1	1	1	1	1	1	1	1	1	1	1	1	1	1	1	1
glcU_2		putative glucose uptake protein GlcU	172	172	1	11	136				863	863	863		1	1	1	1	1	1	1	1	1	1	1	1	1	1	1	1	1	1	1	1	1	1	1	1	1	1	1	1	1	1	1	1	1	1	1
pdp		Pyrimidine-nucleoside phosphorylase	172	172	1	11	3811				1301	1301	1301		1	1	1	1	1	1	1	1	1	1	1	1	1	1	1	1	1	1	1	1	1	1	1	1	1	1	1	1	1	1	1	1	1	1	1
infB		Translation initiation factor IF-2	172	172	1	11	3672				2117	2117	2117		1	1	1	1	1	1	1	1	1	1	1	1	1	1	1	1	1	1	1	1	1	1	1	1	1	1	1	1	1	1	1	1	1	1	1
cls_2		Cardiolipin synthase	172	172	1	11	3861				1484	1484	1484		1	1	1	1	1	1	1	1	1	1	1	1	1	1	1	1	1	1	1	1	1	1	1	1	1	1	1	1	1	1	1	1	1	1	1
group_4336		putative autolysin SsaALP	172	172	1	11	1284				797	797	797		1	1	1	1	1	1	1	1	1	1	1	1	1	1	1	1	1	1	1	1	1	1	1	1	1	1	1	1	1	1	1	1	1	1	1
der_2		GTPase Der	172	172	1	11	3277				1310	1310	1310		1	1	1	1	1	1	1	1	1	1	1	1	1	1	1	1	1	1	1	1	1	1	1	1	1	1	1	1	1	1	1	1	1	1	1
lepA		Elongation factor 4	172	172	1	11	3118				1823	1823	1823		1	1	1	1	1	1	1	1	1	1	1	1	1	1	1	1	1	1	1	1	1	1	1	1	1	1	1	1	1	1	1	1	1	1	1
oatA_1		O-acetyltransferase OatA	172	172	1	11	5109				1811	1811	1811		1	1	1	1	1	1	1	1	1	1	1	1	1	1	1	1	1	1	1	1	1	1	1	1	1	1	1	1	1	1	1	1	1	1	1
metI		Cystathionine gamma-synthase/O-acetylhomoserine (thiol)-lyase	172	172	1	11	4460				1103	1103	1103		1	1	1	1	1	1	1	1	1	1	1	1	1	1	1	1	1	1	1	1	1	1	1	1	1	1	1	1	1	1	1	1	1	1	1
atpG		ATP synthase gamma chain	172	172	1	11	3844				866	866	866		1	1	1	1	1	1	1	1	1	1	1	1	1	1	1	1	1	1	1	1	1	1	1	1	1	1	1	1	1	1	1	1	1	1	1
group_4344		hypothetical protein	172	172	1	11	4812				1667	1667	1667		1	1	1	1	1	1	1	1	1	1	1	1	1	1	1	1	1	1	1	1	1	1	1	1	1	1	1	1	1	1	1	1	1	1	1
group_4346		Putative 3-methyladenine DNA glycosylase	172	172	1	11	5838				608	608	608		1	1	1	1	1	1	1	1	1	1	1	1	1	1	1	1	1	1	1	1	1	1	1	1	1	1	1	1	1	1	1	1	1	1	1
tkt		Transketolase	172	172	1	11	3423				1988	1988	1988		1	1	1	1	1	1	1	1	1	1	1	1	1	1	1	1	1	1	1	1	1	1	1	1	1	1	1	1	1	1	1	1	1	1	1
acp		Sodium/proton-dependent alanine carrier protein	172	172	1	11	4079				1568	1568	1568		1	1	1	1	1	1	1	1	1	1	1	1	1	1	1	1	1	1	1	1	1	1	1	1	1	1	1	1	1	1	1	1	1	1	1
group_4351		hypothetical protein	172	172	1	11	5801				623	623	623		1	1	1	1	1	1	1	1	1	1	1	1	1	1	1	1	1	1	1	1	1	1	1	1	1	1	1	1	1	1	1	1	1	1	1
recF		DNA replication and repair protein RecF	172	172	1	11	4921				1112	1112	1112		1	1	1	1	1	1	1	1	1	1	1	1	1	1	1	1	1	1	1	1	1	1	1	1	1	1	1	1	1	1	1	1	1	1	1
catD		Putative oxidoreductase CatD	172	172	1	11	4056				356	356	356		1	1	1	1	1	1	1	1	1	1	1	1	1	1	1	1	1	1	1	1	1	1	1	1	1	1	1	1	1	1	1	1	1	1	1
phnE_1		Phosphate-import permease protein PhnE	172	172	1	11	4771				800	800	800		1	1	1	1	1	1	1	1	1	1	1	1	1	1	1	1	1	1	1	1	1	1	1	1	1	1	1	1	1	1	1	1	1	1	1
group_4359		hypothetical protein	172	172	1	11	1196				506	506	506		1	1	1	1	1	1	1	1	1	1	1	1	1	1	1	1	1	1	1	1	1	1	1	1	1	1	1	1	1	1	1	1	1	1	1
group_4361		TelA-like protein	172	172	1	11	3357				1136	1136	1136		1	1	1	1	1	1	1	1	1	1	1	1	1	1	1	1	1	1	1	1	1	1	1	1	1	1	1	1	1	1	1	1	1	1	1
group_4363		hypothetical protein	172	172	1	11	1274				923	923	923		1	1	1	1	1	1	1	1	1	1	1	1	1	1	1	1	1	1	1	1	1	1	1	1	1	1	1	1	1	1	1	1	1	1	1
group_4364		hypothetical protein	172	172	1	11	5870				329	329	329		1	1	1	1	1	1	1	1	1	1	1	1	1	1	1	1	1	1	1	1	1	1	1	1	1	1	1	1	1	1	1	1	1	1	1
vraR		Response regulator protein VraR	172	172	1	11	1965				629	629	629		1	1	1	1	1	1	1	1	1	1	1	1	1	1	1	1	1	1	1	1	1	1	1	1	1	1	1	1	1	1	1	1	1	1	1
trmB		tRNA (guanine-N(7)-)-methyltransferase	172	172	1	11	2851				644	644	644		1	1	1	1	1	1	1	1	1	1	1	1	1	1	1	1	1	1	1	1	1	1	1	1	1	1	1	1	1	1	1	1	1	1	1
dltD		Protein DltD	172	172	1	11	4162				1175	1175	1175		1	1	1	1	1	1	1	1	1	1	1	1	1	1	1	1	1	1	1	1	1	1	1	1	1	1	1	1	1	1	1	1	1	1	1
argS		Arginine--tRNA ligase	172	172	1	11	1199				1661	1661	1661		1	1	1	1	1	1	1	1	1	1	1	1	1	1	1	1	1	1	1	1	1	1	1	1	1	1	1	1	1	1	1	1	1	1	1
gpmI		2,3-bisphosphoglycerate-independent phosphoglycerate mutase	172	172	1	11	1434				1517	1517	1517		1	1	1	1	1	1	1	1	1	1	1	1	1	1	1	1	1	1	1	1	1	1	1	1	1	1	1	1	1	1	1	1	1	1	1
group_4372		hypothetical protein	172	172	1	11	3006				689	689	689		1	1	1	1	1	1	1	1	1	1	1	1	1	1	1	1	1	1	1	1	1	1	1	1	1	1	1	1	1	1	1	1	1	1	1
glyA		Serine hydroxymethyltransferase	172	172	1	11	3834				1238	1238	1238		1	1	1	1	1	1	1	1	1	1	1	1	1	1	1	1	1	1	1	1	1	1	1	1	1	1	1	1	1	1	1	1	1	1	1
gatD_2		Lipid II isoglutaminyl synthase (glutamine-hydrolyzing) subunit GatD	172	172	1	11	1973				731	731	731		1	1	1	1	1	1	1	1	1	1	1	1	1	1	1	1	1	1	1	1	1	1	1	1	1	1	1	1	1	1	1	1	1	1	1
grpE		Protein GrpE	172	172	1	11	3121				626	626	626		1	1	1	1	1	1	1	1	1	1	1	1	1	1	1	1	1	1	1	1	1	1	1	1	1	1	1	1	1	1	1	1	1	1	1
moeA		Molybdopterin molybdenumtransferase	172	172	1	11	153				1259	1259	1259		1	1	1	1	1	1	1	1	1	1	1	1	1	1	1	1	1	1	1	1	1	1	1	1	1	1	1	1	1	1	1	1	1	1	1
group_4380		hypothetical protein	172	172	1	11	4154				1316	1316	1316		1	1	1	1	1	1	1	1	1	1	1	1	1	1	1	1	1	1	1	1	1	1	1	1	1	1	1	1	1	1	1	1	1	1	1
bioB		Biotin synthase	172	172	1	11	5679				1007	1007	1007		1	1	1	1	1	1	1	1	1	1	1	1	1	1	1	1	1	1	1	1	1	1	1	1	1	1	1	1	1	1	1	1	1	1	1
ftsW		putative peptidoglycan glycosyltransferase FtsW	172	172	1	11	3976				1226	1226	1226		1	1	1	1	1	1	1	1	1	1	1	1	1	1	1	1	1	1	1	1	1	1	1	1	1	1	1	1	1	1	1	1	1	1	1
recQ_2		ATP-dependent DNA helicase RecQ	172	172	1	11	1377				1778	1781	1780		1	1	1	1	1	1	1	1	1	1	1	1	1	1	1	1	1	1	1	1	1	1	1	1	1	1	1	1	1	1	1	1	1	1	1
mgsR		Regulatory protein MgsR	172	172	1	11	4208				356	356	356		1	1	1	1	1	1	1	1	1	1	1	1	1	1	1	1	1	1	1	1	1	1	1	1	1	1	1	1	1	1	1	1	1	1	1
group_4387		Nucleoid-associated protein	172	172	1	11	4319				317	317	317		1	1	1	1	1	1	1	1	1	1	1	1	1	1	1	1	1	1	1	1	1	1	1	1	1	1	1	1	1	1	1	1	1	1	1
trmFO		Methylenetetrahydrofolate--tRNA-(uracil-5-)-methyltransferase TrmFO	172	172	1	11	3690				1307	1307	1307		1	1	1	1	1	1	1	1	1	1	1	1	1	1	1	1	1	1	1	1	1	1	1	1	1	1	1	1	1	1	1	1	1	1	1
mccA		O-acetylserine dependent cystathionine beta-synthase	172	172	1	11	4338				890	944	906		1	1	1	1	1	1	1	1	1	1	1	1	1	1	1	1	1	1	1	1	1	1	1	1	1	1	1	1	1	1	1	1	1	1	1
group_4391		putative response regulatory protein	172	172	1	11	4655				758	758	758		1	1	1	1	1	1	1	1	1	1	1	1	1	1	1	1	1	1	1	1	1	1	1	1	1	1	1	1	1	1	1	1	1	1	1
glnR		HTH-type transcriptional regulator GlnR	172	172	1	11	3482				368	368	368		1	1	1	1	1	1	1	1	1	1	1	1	1	1	1	1	1	1	1	1	1	1	1	1	1	1	1	1	1	1	1	1	1	1	1
mdtH		Multidrug resistance protein MdtH	172	172	1	11	2836				1181	1181	1181		1	1	1	1	1	1	1	1	1	1	1	1	1	1	1	1	1	1	1	1	1	1	1	1	1	1	1	1	1	1	1	1	1	1	1
coaD		Phosphopantetheine adenylyltransferase	172	172	1	11	3965				482	482	482		1	1	1	1	1	1	1	1	1	1	1	1	1	1	1	1	1	1	1	1	1	1	1	1	1	1	1	1	1	1	1	1	1	1	1
group_4396		hypothetical protein	172	172	1	11	3439				584	584	584		1	1	1	1	1	1	1	1	1	1	1	1	1	1	1	1	1	1	1	1	1	1	1	1	1	1	1	1	1	1	1	1	1	1	1
uppS		Isoprenyl transferase	172	172	1	11	3681				770	770	770		1	1	1	1	1	1	1	1	1	1	1	1	1	1	1	1	1	1	1	1	1	1	1	1	1	1	1	1	1	1	1	1	1	1	1
tagO		putative undecaprenyl-phosphate N-acetylglucosaminyl 1-phosphate transferase	172	172	1	11	1405				1055	1055	1055		1	1	1	1	1	1	1	1	1	1	1	1	1	1	1	1	1	1	1	1	1	1	1	1	1	1	1	1	1	1	1	1	1	1	1
recA		Protein RecA	172	172	1	11	3505				1043	1043	1043		1	1	1	1	1	1	1	1	1	1	1	1	1	1	1	1	1	1	1	1	1	1	1	1	1	1	1	1	1	1	1	1	1	1	1
pepA_1		Glutamyl aminopeptidase	172	172	1	11	2854				1076	1076	1076		1	1	1	1	1	1	1	1	1	1	1	1	1	1	1	1	1	1	1	1	1	1	1	1	1	1	1	1	1	1	1	1	1	1	1
group_4403		hypothetical protein	172	172	1	11	3360				308	308	308		1	1	1	1	1	1	1	1	1	1	1	1	1	1	1	1	1	1	1	1	1	1	1	1	1	1	1	1	1	1	1	1	1	1	1
tpiA		Triosephosphate isomerase	172	172	1	11	1433				761	761	761		1	1	1	1	1	1	1	1	1	1	1	1	1	1	1	1	1	1	1	1	1	1	1	1	1	1	1	1	1	1	1	1	1	1	1
hflX		GTPase HflX	172	172	1	11	3484				1238	1241	1238		1	1	1	1	1	1	1	1	1	1	1	1	1	1	1	1	1	1	1	1	1	1	1	1	1	1	1	1	1	1	1	1	1	1	1
rsmI		Ribosomal RNA small subunit methyltransferase I	172	172	1	12	9				839	839	839		1	1	1	1	1	1	1	1	1	1	1	1	1	1	1	1	1	1	1	1	1	1	1	1	1	1	1	1	1	1	1	1	1	1	1
znuB		High-affinity zinc uptake system membrane protein ZnuB	172	172	1	11	3147				872	872	872		1	1	1	1	1	1	1	1	1	1	1	1	1	1	1	1	1	1	1	1	1	1	1	1	1	1	1	1	1	1	1	1	1	1	1
panD		Aspartate 1-decarboxylase	172	172	1	11	5075				383	383	383		1	1	1	1	1	1	1	1	1	1	1	1	1	1	1	1	1	1	1	1	1	1	1	1	1	1	1	1	1	1	1	1	1	1	1
queD		6-carboxy-5,6,7,8-tetrahydropterin synthase	172	172	1	11	1368				419	419	419		1	1	1	1	1	1	1	1	1	1	1	1	1	1	1	1	1	1	1	1	1	1	1	1	1	1	1	1	1	1	1	1	1	1	1
group_4413		Ferredoxin--NADP reductase	172	172	1	11	5804				1034	1034	1034		1	1	1	1	1	1	1	1	1	1	1	1	1	1	1	1	1	1	1	1	1	1	1	1	1	1	1	1	1	1	1	1	1	1	1
murI		Glutamate racemase	172	172	1	11	3934				800	800	800		1	1	1	1	1	1	1	1	1	1	1	1	1	1	1	1	1	1	1	1	1	1	1	1	1	1	1	1	1	1	1	1	1	1	1
tarI1		Ribitol-5-phosphate cytidylyltransferase 1	172	172	1	11	4619				716	716	716		1	1	1	1	1	1	1	1	1	1	1	1	1	1	1	1	1	1	1	1	1	1	1	1	1	1	1	1	1	1	1	1	1	1	1
coaBC		Coenzyme A biosynthesis bifunctional protein CoaBC	172	172	1	11	3734				1199	1199	1199		1	1	1	1	1	1	1	1	1	1	1	1	1	1	1	1	1	1	1	1	1	1	1	1	1	1	1	1	1	1	1	1	1	1	1
group_4418		putative protein	172	172	1	11	3175				362	362	362		1	1	1	1	1	1	1	1	1	1	1	1	1	1	1	1	1	1	1	1	1	1	1	1	1	1	1	1	1	1	1	1	1	1	1
tet(38)		tetracycline efflux MFS transporter Tet(38)	172	172	1	11	4775				1358	1358	1358		1	1	1	1	1	1	1	1	1	1	1	1	1	1	1	1	1	1	1	1	1	1	1	1	1	1	1	1	1	1	1	1	1	1	1
group_4422		Lipoate--protein ligase 1	172	172	1	11	4063				986	986	986		1	1	1	1	1	1	1	1	1	1	1	1	1	1	1	1	1	1	1	1	1	1	1	1	1	1	1	1	1	1	1	1	1	1	1
lexA_1		LexA repressor	172	172	1	11	3426				623	623	623		1	1	1	1	1	1	1	1	1	1	1	1	1	1	1	1	1	1	1	1	1	1	1	1	1	1	1	1	1	1	1	1	1	1	1
thrS		Threonine--tRNA ligase	172	172	1	11	3030				1934	1937	1936		1	1	1	1	1	1	1	1	1	1	1	1	1	1	1	1	1	1	1	1	1	1	1	1	1	1	1	1	1	1	1	1	1	1	1
group_4427		hypothetical protein	172	172	1	12	4				926	926	926		1	1	1	1	1	1	1	1	1	1	1	1	1	1	1	1	1	1	1	1	1	1	1	1	1	1	1	1	1	1	1	1	1	1	1
rpmI		50S ribosomal protein L35	172	172	1	11	3033				200	200	200		1	1	1	1	1	1	1	1	1	1	1	1	1	1	1	1	1	1	1	1	1	1	1	1	1	1	1	1	1	1	1	1	1	1	1
ilvC		Ketol-acid reductoisomerase (NADP(+))	172	172	1	11	1457				1004	1004	1004		1	1	1	1	1	1	1	1	1	1	1	1	1	1	1	1	1	1	1	1	1	1	1	1	1	1	1	1	1	1	1	1	1	1	1
recG		ATP-dependent DNA helicase RecG	172	172	1	11	3716				2060	2060	2060		1	1	1	1	1	1	1	1	1	1	1	1	1	1	1	1	1	1	1	1	1	1	1	1	1	1	1	1	1	1	1	1	1	1	1
zwf		Glucose-6-phosphate 1-dehydrogenase	172	172	1	11	3197				1484	1484	1484		1	1	1	1	1	1	1	1	1	1	1	1	1	1	1	1	1	1	1	1	1	1	1	1	1	1	1	1	1	1	1	1	1	1	1
recR		Recombination protein RecR	172	172	1	11	4318				596	596	596		1	1	1	1	1	1	1	1	1	1	1	1	1	1	1	1	1	1	1	1	1	1	1	1	1	1	1	1	1	1	1	1	1	1	1
darA		Cyclic di-AMP receptor A	172	172	1	12	3				329	329	329		1	1	1	1	1	1	1	1	1	1	1	1	1	1	1	1	1	1	1	1	1	1	1	1	1	1	1	1	1	1	1	1	1	1	1
rpmA		50S ribosomal protein L27	172	172	1	11	3059				284	284	284		1	1	1	1	1	1	1	1	1	1	1	1	1	1	1	1	1	1	1	1	1	1	1	1	1	1	1	1	1	1	1	1	1	1	1
group_4440		N-carbamoylsarcosine amidase	172	172	1	11	5016				560	560	560		1	1	1	1	1	1	1	1	1	1	1	1	1	1	1	1	1	1	1	1	1	1	1	1	1	1	1	1	1	1	1	1	1	1	1
sufT		Fe-S protein maturation auxiliary factor SufT	172	172	1	11	4124				308	308	308		1	1	1	1	1	1	1	1	1	1	1	1	1	1	1	1	1	1	1	1	1	1	1	1	1	1	1	1	1	1	1	1	1	1	1
rimM		Ribosome maturation factor RimM	172	172	1	11	3704				503	503	503		1	1	1	1	1	1	1	1	1	1	1	1	1	1	1	1	1	1	1	1	1	1	1	1	1	1	1	1	1	1	1	1	1	1	1
ilvD		Dihydroxy-acid dehydratase	172	172	1	11	1460				1688	1688	1688		1	1	1	1	1	1	1	1	1	1	1	1	1	1	1	1	1	1	1	1	1	1	1	1	1	1	1	1	1	1	1	1	1	1	1
group_4444		hypothetical protein	172	172	1	11	1967				701	701	701		1	1	1	1	1	1	1	1	1	1	1	1	1	1	1	1	1	1	1	1	1	1	1	1	1	1	1	1	1	1	1	1	1	1	1
group_4445		hypothetical protein	172	172	1	11	2853				314	314	314		1	1	1	1	1	1	1	1	1	1	1	1	1	1	1	1	1	1	1	1	1	1	1	1	1	1	1	1	1	1	1	1	1	1	1
plsC		1-acyl-sn-glycerol-3-phosphate acyltransferase	172	172	1	11	2876				617	617	617		1	1	1	1	1	1	1	1	1	1	1	1	1	1	1	1	1	1	1	1	1	1	1	1	1	1	1	1	1	1	1	1	1	1	1
yitJ		Bifunctional homocysteine S-methyltransferase/5,10-methylenetetrahydrofolate reductase	172	172	1	11	4462				1841	1841	1841		1	1	1	1	1	1	1	1	1	1	1	1	1	1	1	1	1	1	1	1	1	1	1	1	1	1	1	1	1	1	1	1	1	1	1
ruvB_1		Holliday junction ATP-dependent DNA helicase RuvB	172	172	1	11	3063				1004	1004	1004		1	1	1	1	1	1	1	1	1	1	1	1	1	1	1	1	1	1	1	1	1	1	1	1	1	1	1	1	1	1	1	1	1	1	1
ruvA		Holliday junction ATP-dependent DNA helicase RuvA	172	172	1	11	3062				602	602	602		1	1	1	1	1	1	1	1	1	1	1	1	1	1	1	1	1	1	1	1	1	1	1	1	1	1	1	1	1	1	1	1	1	1	1
pdxS		Pyridoxal 5'-phosphate synthase subunit PdxS	172	172	1	11	992				887	887	887		1	1	1	1	1	1	1	1	1	1	1	1	1	1	1	1	1	1	1	1	1	1	1	1	1	1	1	1	1	1	1	1	1	1	1
rlmL		Ribosomal RNA large subunit methyltransferase L	172	172	1	11	3308				1145	1145	1145		1	1	1	1	1	1	1	1	1	1	1	1	1	1	1	1	1	1	1	1	1	1	1	1	1	1	1	1	1	1	1	1	1	1	1
group_4457		hypothetical protein	172	172	1	12	29				1526	1526	1526		1	1	1	1	1	1	1	1	1	1	1	1	1	1	1	1	1	1	1	1	1	1	1	1	1	1	1	1	1	1	1	1	1	1	1
deoD1		Purine nucleoside phosphorylase DeoD-type 1	172	172	1	11	3809				710	710	710		1	1	1	1	1	1	1	1	1	1	1	1	1	1	1	1	1	1	1	1	1	1	1	1	1	1	1	1	1	1	1	1	1	1	1
deoB		Phosphopentomutase	172	172	1	11	4773				1178	1178	1178		1	1	1	1	1	1	1	1	1	1	1	1	1	1	1	1	1	1	1	1	1	1	1	1	1	1	1	1	1	1	1	1	1	1	1
argH		Argininosuccinate lyase	172	172	1	11	4136				1379	1379	1379		1	1	1	1	1	1	1	1	1	1	1	1	1	1	1	1	1	1	1	1	1	1	1	1	1	1	1	1	1	1	1	1	1	1	1
argG		Argininosuccinate synthase	172	172	1	11	4135				1205	1205	1205		1	1	1	1	1	1	1	1	1	1	1	1	1	1	1	1	1	1	1	1	1	1	1	1	1	1	1	1	1	1	1	1	1	1	1
glnA		Glutamine synthetase	172	172	1	11	3481				1340	1340	1340		1	1	1	1	1	1	1	1	1	1	1	1	1	1	1	1	1	1	1	1	1	1	1	1	1	1	1	1	1	1	1	1	1	1	1
group_4465		Glucosaminate ammonia-lyase	172	172	1	11	3273				986	986	986		1	1	1	1	1	1	1	1	1	1	1	1	1	1	1	1	1	1	1	1	1	1	1	1	1	1	1	1	1	1	1	1	1	1	1
sigA		RNA polymerase sigma factor SigA	172	172	1	11	3141				1106	1106	1106		1	1	1	1	1	1	1	1	1	1	1	1	1	1	1	1	1	1	1	1	1	1	1	1	1	1	1	1	1	1	1	1	1	1	1
group_4471		Putative heme-dependent peroxidase	172	177	1.03	11	1143				752	752	752		1	1	1	1	1	1	1	1	1	1	1	1	1	1	1	1	1	1	1	1	1	1	1	1	1	1	1	1	1	1	1	1	1	1	1
group_4477		hypothetical protein	172	177	1.03	11	1142				764	764	764		1	1	1	1	1	1	1	1	1	1	1	1	1	1	1	1	1	1	1	1	1	1	1	1	1	1	1	1	1	1	1	1	1	1	1
group_448		hypothetical protein	172	172	1	11	2791				104	572	519		1	1	1	1	1	1	1	1	1	1	1	1	1	1	1	1	1	1	1	1	1	1	1	1	1	1	1	1	1	1	1	1	1	1	1
arcB		Ornithine carbamoyltransferase, catabolic	172	172	1	11	5031				1010	1010	1010		1	1	1	1	1	1	1	1	1	1	1	1	1	1	1	1	1	1	1	1	1	1	1	1	1	1	1	1	1	1	1	1	1	1	1
group_4484		hypothetical protein	172	172	1	11	5803				431	431	431		1	1	1	1	1	1	1	1	1	1	1	1	1	1	1	1	1	1	1	1	1	1	1	1	1	1	1	1	1	1	1	1	1	1	1
cidB		Holin-like protein CidB	172	172	1	11	5142				689	689	689		1	1	1	1	1	1	1	1	1	1	1	1	1	1	1	1	1	1	1	1	1	1	1	1	1	1	1	1	1	1	1	1	1	1	1
btuD_1		Vitamin B12 import ATP-binding protein BtuD	172	172	1	11	3146				785	785	785		1	1	1	1	1	1	1	1	1	1	1	1	1	1	1	1	1	1	1	1	1	1	1	1	1	1	1	1	1	1	1	1	1	1	1
rplV		50S ribosomal protein L22	172	172	1	11	125				353	353	353		1	1	1	1	1	1	1	1	1	1	1	1	1	1	1	1	1	1	1	1	1	1	1	1	1	1	1	1	1	1	1	1	1	1	1
group_4491		hypothetical protein	172	172	1	11	1399				320	320	320		1	1	1	1	1	1	1	1	1	1	1	1	1	1	1	1	1	1	1	1	1	1	1	1	1	1	1	1	1	1	1	1	1	1	1
ydjF		putative HTH-type transcriptional regulator YdjF	172	172	1	11	1352				761	764	763		1	1	1	1	1	1	1	1	1	1	1	1	1	1	1	1	1	1	1	1	1	1	1	1	1	1	1	1	1	1	1	1	1	1	1
caiA		Crotonobetainyl-CoA reductase	172	172	1	11	4642				1211	1211	1211		1	1	1	1	1	1	1	1	1	1	1	1	1	1	1	1	1	1	1	1	1	1	1	1	1	1	1	1	1	1	1	1	1	1	1
rocD2_2		Ornithine aminotransferase 2	172	172	1	11	4139				1190	1190	1190		1	1	1	1	1	1	1	1	1	1	1	1	1	1	1	1	1	1	1	1	1	1	1	1	1	1	1	1	1	1	1	1	1	1	1
ureA		Urease subunit gamma	172	172	1	11	167				302	302	302		1	1	1	1	1	1	1	1	1	1	1	1	1	1	1	1	1	1	1	1	1	1	1	1	1	1	1	1	1	1	1	1	1	1	1
group_4498		hypothetical protein	172	177	1.03	11	1128				368	368	368		1	1	1	1	1	1	1	1	1	1	1	1	1	1	1	1	1	1	1	1	1	1	1	1	1	1	1	1	1	1	1	1	1	1	1
glpK		Glycerol kinase	172	172	1	11	3490				1496	1496	1496		1	1	1	1	1	1	1	1	1	1	1	1	1	1	1	1	1	1	1	1	1	1	1	1	1	1	1	1	1	1	1	1	1	1	1
kimA		Potassium transporter KimA	172	172	1	11	5662				1829	1829	1829		1	1	1	1	1	1	1	1	1	1	1	1	1	1	1	1	1	1	1	1	1	1	1	1	1	1	1	1	1	1	1	1	1	1	1
group_4509		3-hexulose-6-phosphate synthase	172	177	1.03	11	1074				632	632	632		1	1	1	1	1	1	1	1	1	1	1	1	1	1	1	1	1	1	1	1	1	1	1	1	1	1	1	1	1	1	1	1	1	1	1
pdhD		Dihydrolipoyl dehydrogenase	172	172	1	11	3993				1406	1406	1406		1	1	1	1	1	1	1	1	1	1	1	1	1	1	1	1	1	1	1	1	1	1	1	1	1	1	1	1	1	1	1	1	1	1	1
dgk		Deoxyguanosine kinase	172	177	1.03	11	1031				617	617	617		1	1	1	1	1	1	1	1	1	1	1	1	1	1	1	1	1	1	1	1	1	1	1	1	1	1	1	1	1	1	1	1	1	1	1
group_4522		hypothetical protein	172	172	1	11	1404				1070	1070	1070		1	1	1	1	1	1	1	1	1	1	1	1	1	1	1	1	1	1	1	1	1	1	1	1	1	1	1	1	1	1	1	1	1	1	1
group_4523		hypothetical protein	172	172	1	11	3355				1886	1886	1886		1	1	1	1	1	1	1	1	1	1	1	1	1	1	1	1	1	1	1	1	1	1	1	1	1	1	1	1	1	1	1	1	1	1	1
rny		Ribonuclease Y	172	172	1	11	3504				1559	1559	1559		1	1	1	1	1	1	1	1	1	1	1	1	1	1	1	1	1	1	1	1	1	1	1	1	1	1	1	1	1	1	1	1	1	1	1
nirQ		Denitrification regulatory protein NirQ	172	172	1	11	3354				791	791	791		1	1	1	1	1	1	1	1	1	1	1	1	1	1	1	1	1	1	1	1	1	1	1	1	1	1	1	1	1	1	1	1	1	1	1
group_4529		hypothetical protein	172	172	1	11	4658				968	968	968		1	1	1	1	1	1	1	1	1	1	1	1	1	1	1	1	1	1	1	1	1	1	1	1	1	1	1	1	1	1	1	1	1	1	1
prsA		Foldase protein PrsA	172	172	1	11	2701				962	962	962		1	1	1	1	1	1	1	1	1	1	1	1	1	1	1	1	1	1	1	1	1	1	1	1	1	1	1	1	1	1	1	1	1	1	1
atpB		ATP synthase subunit a	172	172	1	11	3839				728	728	728		1	1	1	1	1	1	1	1	1	1	1	1	1	1	1	1	1	1	1	1	1	1	1	1	1	1	1	1	1	1	1	1	1	1	1
ftsA		Cell division protein FtsA	172	172	1	11	3876				1406	1412	1410		1	1	1	1	1	1	1	1	1	1	1	1	1	1	1	1	1	1	1	1	1	1	1	1	1	1	1	1	1	1	1	1	1	1	1
group_4536		hypothetical protein	172	172	1	11	3496				491	491	491		1	1	1	1	1	1	1	1	1	1	1	1	1	1	1	1	1	1	1	1	1	1	1	1	1	1	1	1	1	1	1	1	1	1	1
malG		Maltose/maltodextrin transport system permease protein MalG	172	172	1	11	4661				839	839	839		1	1	1	1	1	1	1	1	1	1	1	1	1	1	1	1	1	1	1	1	1	1	1	1	1	1	1	1	1	1	1	1	1	1	1
ureG		Urease accessory protein UreG	172	172	1	11	5892				614	614	614		1	1	1	1	1	1	1	1	1	1	1	1	1	1	1	1	1	1	1	1	1	1	1	1	1	1	1	1	1	1	1	1	1	1	1
mnhA1		Na(+)/H(+) antiporter subunit A1	172	172	1	11	4145				2405	2405	2405		1	1	1	1	1	1	1	1	1	1	1	1	1	1	1	1	1	1	1	1	1	1	1	1	1	1	1	1	1	1	1	1	1	1	1
yfiY		putative siderophore-binding lipoprotein YfiY	172	172	1	11	4802				992	992	992		1	1	1	1	1	1	1	1	1	1	1	1	1	1	1	1	1	1	1	1	1	1	1	1	1	1	1	1	1	1	1	1	1	1	1
rplI		50S ribosomal protein L9	172	172	1	11	4910				446	446	446		1	1	1	1	1	1	1	1	1	1	1	1	1	1	1	1	1	1	1	1	1	1	1	1	1	1	1	1	1	1	1	1	1	1	1
folE2		GTP cyclohydrolase FolE2	172	177	1.03	11	1067				878	878	878		1	1	1	1	1	1	1	1	1	1	1	1	1	1	1	1	1	1	1	1	1	1	1	1	1	1	1	1	1	1	1	1	1	1	1
mtaB		Threonylcarbamoyladenosine tRNA methylthiotransferase MtaB	172	172	1	11	3126				1346	1346	1346		1	1	1	1	1	1	1	1	1	1	1	1	1	1	1	1	1	1	1	1	1	1	1	1	1	1	1	1	1	1	1	1	1	1	1
adhE		Aldehyde-alcohol dehydrogenase	172	172	1	11	4762				2609	2609	2609		1	1	1	1	1	1	1	1	1	1	1	1	1	1	1	1	1	1	1	1	1	1	1	1	1	1	1	1	1	1	1	1	1	1	1
rpsK		30S ribosomal protein S11	172	172	1	11	103				389	389	389		1	1	1	1	1	1	1	1	1	1	1	1	1	1	1	1	1	1	1	1	1	1	1	1	1	1	1	1	1	1	1	1	1	1	1
secDF		Protein translocase subunit SecDF	172	172	1	11	3067				2279	2279	2279		1	1	1	1	1	1	1	1	1	1	1	1	1	1	1	1	1	1	1	1	1	1	1	1	1	1	1	1	1	1	1	1	1	1	1
rplN		50S ribosomal protein L14	172	172	1	11	120				368	368	368		1	1	1	1	1	1	1	1	1	1	1	1	1	1	1	1	1	1	1	1	1	1	1	1	1	1	1	1	1	1	1	1	1	1	1
yggS		Pyridoxal phosphate homeostasis protein	172	172	1	11	3873				668	674	668		1	1	1	1	1	1	1	1	1	1	1	1	1	1	1	1	1	1	1	1	1	1	1	1	1	1	1	1	1	1	1	1	1	1	1
ptsG_2		PTS system glucose-specific EIICBA component	172	172	1	11	4633				1529	1529	1529		1	1	1	1	1	1	1	1	1	1	1	1	1	1	1	1	1	1	1	1	1	1	1	1	1	1	1	1	1	1	1	1	1	1	1
ldh1		L-lactate dehydrogenase 1	172	172	1	11	4634				953	953	953		1	1	1	1	1	1	1	1	1	1	1	1	1	1	1	1	1	1	1	1	1	1	1	1	1	1	1	1	1	1	1	1	1	1	1
gtaB		UTP--glucose-1-phosphate uridylyltransferase	172	172	1	11	5232				866	866	866		1	1	1	1	1	1	1	1	1	1	1	1	1	1	1	1	1	1	1	1	1	1	1	1	1	1	1	1	1	1	1	1	1	1	1
group_4567		hypothetical protein	172	172	1	11	3086				260	260	260		1	1	1	1	1	1	1	1	1	1	1	1	1	1	1	1	1	1	1	1	1	1	1	1	1	1	1	1	1	1	1	1	1	1	1
cntB		Metal-staphylopine import system permease protein CntB	172	172	1	11	5634				935	935	935		1	1	1	1	1	1	1	1	1	1	1	1	1	1	1	1	1	1	1	1	1	1	1	1	1	1	1	1	1	1	1	1	1	1	1
msrB		Peptide methionine sulfoxide reductase MsrB	172	172	1	11	3336				428	428	428		1	1	1	1	1	1	1	1	1	1	1	1	1	1	1	1	1	1	1	1	1	1	1	1	1	1	1	1	1	1	1	1	1	1	1
hdl IVa		(S)-2-haloacid dehalogenase 4A	172	172	1	11	1203				719	719	719		1	1	1	1	1	1	1	1	1	1	1	1	1	1	1	1	1	1	1	1	1	1	1	1	1	1	1	1	1	1	1	1	1	1	1
xerD_1		Tyrosine recombinase XerD	172	172	1	11	3206				887	887	887		1	1	1	1	1	1	1	1	1	1	1	1	1	1	1	1	1	1	1	1	1	1	1	1	1	1	1	1	1	1	1	1	1	1	1
pcrA		ATP-dependent DNA helicase PcrA	172	172	1	11	1987				2192	2192	2192		1	1	1	1	1	1	1	1	1	1	1	1	1	1	1	1	1	1	1	1	1	1	1	1	1	1	1	1	1	1	1	1	1	1	1
tagH_1		Teichoic acids export ATP-binding protein TagH	172	172	1	11	1927				1517	1517	1517		1	1	1	1	1	1	1	1	1	1	1	1	1	1	1	1	1	1	1	1	1	1	1	1	1	1	1	1	1	1	1	1	1	1	1
thiK		hypothetical protein	172	172	1	11	2850				791	791	791		1	1	1	1	1	1	1	1	1	1	1	1	1	1	1	1	1	1	1	1	1	1	1	1	1	1	1	1	1	1	1	1	1	1	1
nusA		Transcription termination/antitermination protein NusA	172	172	1	11	3675				1175	1175	1175		1	1	1	1	1	1	1	1	1	1	1	1	1	1	1	1	1	1	1	1	1	1	1	1	1	1	1	1	1	1	1	1	1	1	1
group_4583		hypothetical protein	172	176	1.03	11	1156				983	983	983		1	1	1	1	1	1	1	1	1	1	1	1	1	1	1	1	1	1	1	1	1	1	1	1	1	1	1	1	1	1	1	1	1	1	1
thiN		Thiamine pyrophosphokinase	172	172	1	11	3720				641	641	641		1	1	1	1	1	1	1	1	1	1	1	1	1	1	1	1	1	1	1	1	1	1	1	1	1	1	1	1	1	1	1	1	1	1	1
rpe		Ribulose-phosphate 3-epimerase	172	172	1	11	3721				644	644	644		1	1	1	1	1	1	1	1	1	1	1	1	1	1	1	1	1	1	1	1	1	1	1	1	1	1	1	1	1	1	1	1	1	1	1
group_4595		Gluconeogenesis factor	172	172	1	11	1424				995	995	995		1	1	1	1	1	1	1	1	1	1	1	1	1	1	1	1	1	1	1	1	1	1	1	1	1	1	1	1	1	1	1	1	1	1	1
group_4596		hypothetical protein	172	172	1	11	4437				626	626	626		1	1	1	1	1	1	1	1	1	1	1	1	1	1	1	1	1	1	1	1	1	1	1	1	1	1	1	1	1	1	1	1	1	1	1
hemC		Porphobilinogen deaminase	172	172	1	11	3042				926	926	926		1	1	1	1	1	1	1	1	1	1	1	1	1	1	1	1	1	1	1	1	1	1	1	1	1	1	1	1	1	1	1	1	1	1	1
group_4599		hypothetical protein	172	172	1	11	3041				815	815	815		1	1	1	1	1	1	1	1	1	1	1	1	1	1	1	1	1	1	1	1	1	1	1	1	1	1	1	1	1	1	1	1	1	1	1
gltX		Glutamate--tRNA ligase	172	172	1	11	1001				1454	1454	1454		1	1	1	1	1	1	1	1	1	1	1	1	1	1	1	1	1	1	1	1	1	1	1	1	1	1	1	1	1	1	1	1	1	1	1
group_4602		hypothetical protein	172	172	1	11	2806				908	908	908		1	1	1	1	1	1	1	1	1	1	1	1	1	1	1	1	1	1	1	1	1	1	1	1	1	1	1	1	1	1	1	1	1	1	1
plsY		Glycerol-3-phosphate acyltransferase	172	172	1	11	3412				608	608	608		1	1	1	1	1	1	1	1	1	1	1	1	1	1	1	1	1	1	1	1	1	1	1	1	1	1	1	1	1	1	1	1	1	1	1
pstS		Phosphate-binding protein PstS	172	172	1	11	3373				983	983	983		1	1	1	1	1	1	1	1	1	1	1	1	1	1	1	1	1	1	1	1	1	1	1	1	1	1	1	1	1	1	1	1	1	1	1
yodB		HTH-type transcriptional regulator YodB	172	172	1	11	3824				335	335	335		1	1	1	1	1	1	1	1	1	1	1	1	1	1	1	1	1	1	1	1	1	1	1	1	1	1	1	1	1	1	1	1	1	1	1
group_4608		hypothetical protein	172	172	1	11	144				764	764	764		1	1	1	1	1	1	1	1	1	1	1	1	1	1	1	1	1	1	1	1	1	1	1	1	1	1	1	1	1	1	1	1	1	1	1
yvyI		Putative mannose-6-phosphate isomerase YvyI	172	172	1	11	5019				938	938	938		1	1	1	1	1	1	1	1	1	1	1	1	1	1	1	1	1	1	1	1	1	1	1	1	1	1	1	1	1	1	1	1	1	1	1
gcvPB		putative glycine dehydrogenase (decarboxylating) subunit 2	172	172	1	11	3166				1472	1472	1472		1	1	1	1	1	1	1	1	1	1	1	1	1	1	1	1	1	1	1	1	1	1	1	1	1	1	1	1	1	1	1	1	1	1	1
clpX		ATP-dependent Clp protease ATP-binding subunit ClpX	172	172	1	11	3038				1262	1262	1262		1	1	1	1	1	1	1	1	1	1	1	1	1	1	1	1	1	1	1	1	1	1	1	1	1	1	1	1	1	1	1	1	1	1	1
lacC_1		Tagatose-6-phosphate kinase	172	172	1	11	67				932	932	932		1	1	1	1	1	1	1	1	1	1	1	1	1	1	1	1	1	1	1	1	1	1	1	1	1	1	1	1	1	1	1	1	1	1	1
group_4617		hypothetical protein	172	172	1	11	3850				440	440	440		1	1	1	1	1	1	1	1	1	1	1	1	1	1	1	1	1	1	1	1	1	1	1	1	1	1	1	1	1	1	1	1	1	1	1
group_4618		hypothetical protein	172	172	1	11	3422				287	287	287		1	1	1	1	1	1	1	1	1	1	1	1	1	1	1	1	1	1	1	1	1	1	1	1	1	1	1	1	1	1	1	1	1	1	1
gapA2		Glyceraldehyde-3-phosphate dehydrogenase 2	172	172	1	11	3026				1025	1025	1025		1	1	1	1	1	1	1	1	1	1	1	1	1	1	1	1	1	1	1	1	1	1	1	1	1	1	1	1	1	1	1	1	1	1	1
rplX		50S ribosomal protein L24	172	172	1	11	119				317	317	317		1	1	1	1	1	1	1	1	1	1	1	1	1	1	1	1	1	1	1	1	1	1	1	1	1	1	1	1	1	1	1	1	1	1	1
argR_1		Arginine repressor	172	172	1	11	3180				452	452	452		1	1	1	1	1	1	1	1	1	1	1	1	1	1	1	1	1	1	1	1	1	1	1	1	1	1	1	1	1	1	1	1	1	1	1
group_4626		hypothetical protein	172	172	1	11	2862				491	491	491		1	1	1	1	1	1	1	1	1	1	1	1	1	1	1	1	1	1	1	1	1	1	1	1	1	1	1	1	1	1	1	1	1	1	1
group_4627		hypothetical protein	172	172	1	11	5861				530	530	530		1	1	1	1	1	1	1	1	1	1	1	1	1	1	1	1	1	1	1	1	1	1	1	1	1	1	1	1	1	1	1	1	1	1	1
fabG		3-oxoacyl-[acyl-carrier-protein] reductase FabG	172	172	1	11	3712				734	734	734		1	1	1	1	1	1	1	1	1	1	1	1	1	1	1	1	1	1	1	1	1	1	1	1	1	1	1	1	1	1	1	1	1	1	1
lip2		Lipase 2	172	172	1	11	4514				1874	2075	2040		1	1	1	1	1	1	1	1	1	1	1	1	1	1	1	1	1	1	1	1	1	1	1	1	1	1	1	1	1	1	1	1	1	1	1
dinG_1		3'-5' exonuclease DinG	172	172	1	11	3297				2693	2693	2693		1	1	1	1	1	1	1	1	1	1	1	1	1	1	1	1	1	1	1	1	1	1	1	1	1	1	1	1	1	1	1	1	1	1	1
nrdR		Transcriptional repressor NrdR	172	172	1	11	3027				470	470	470		1	1	1	1	1	1	1	1	1	1	1	1	1	1	1	1	1	1	1	1	1	1	1	1	1	1	1	1	1	1	1	1	1	1	1
rpsU		30S ribosomal protein S21	172	172	1	11	3127				176	176	176		1	1	1	1	1	1	1	1	1	1	1	1	1	1	1	1	1	1	1	1	1	1	1	1	1	1	1	1	1	1	1	1	1	1	1
carB		Carbamoyl-phosphate synthase large chain	172	172	1	11	3742				3173	3173	3173		1	1	1	1	1	1	1	1	1	1	1	1	1	1	1	1	1	1	1	1	1	1	1	1	1	1	1	1	1	1	1	1	1	1	1
carA_2		Carbamoyl-phosphate synthase small chain	172	172	1	11	3743				1100	1100	1100		1	1	1	1	1	1	1	1	1	1	1	1	1	1	1	1	1	1	1	1	1	1	1	1	1	1	1	1	1	1	1	1	1	1	1
hssR		Heme response regulator HssR	172	172	1	11	5817				674	674	674		1	1	1	1	1	1	1	1	1	1	1	1	1	1	1	1	1	1	1	1	1	1	1	1	1	1	1	1	1	1	1	1	1	1	1
ftsK		DNA translocase FtsK	172	172	1	11	3665				2366	2369	2366		1	1	1	1	1	1	1	1	1	1	1	1	1	1	1	1	1	1	1	1	1	1	1	1	1	1	1	1	1	1	1	1	1	1	1
bfmBAA		2-oxoisovalerate dehydrogenase subunit alpha	172	172	1	11	3184				992	992	992		1	1	1	1	1	1	1	1	1	1	1	1	1	1	1	1	1	1	1	1	1	1	1	1	1	1	1	1	1	1	1	1	1	1	1
group_4645		hypothetical protein	172	172	1	11	3189				92	92	92		1	1	1	1	1	1	1	1	1	1	1	1	1	1	1	1	1	1	1	1	1	1	1	1	1	1	1	1	1	1	1	1	1	1	1
rnj1		Ribonuclease J 1	172	172	1	11	4000				1697	1697	1697		1	1	1	1	1	1	1	1	1	1	1	1	1	1	1	1	1	1	1	1	1	1	1	1	1	1	1	1	1	1	1	1	1	1	1
group_4648		hypothetical protein	172	172	1	11	1262				833	833	833		1	1	1	1	1	1	1	1	1	1	1	1	1	1	1	1	1	1	1	1	1	1	1	1	1	1	1	1	1	1	1	1	1	1	1
citZ		Citrate synthase 2	172	172	1	11	3018				1121	1121	1121		1	1	1	1	1	1	1	1	1	1	1	1	1	1	1	1	1	1	1	1	1	1	1	1	1	1	1	1	1	1	1	1	1	1	1
group_4651		Phosphomevalonate kinase	172	177	1.03	11	1157				1076	1076	1076		1	1	1	1	1	1	1	1	1	1	1	1	1	1	1	1	1	1	1	1	1	1	1	1	1	1	1	1	1	1	1	1	1	1	1
folA		Dihydrofolate reductase	172	172	1	11	3333				479	479	479		1	1	1	1	1	1	1	1	1	1	1	1	1	1	1	1	1	1	1	1	1	1	1	1	1	1	1	1	1	1	1	1	1	1	1
group_4659		Alkaline shock protein 23	172	172	1	11	55				509	509	509		1	1	1	1	1	1	1	1	1	1	1	1	1	1	1	1	1	1	1	1	1	1	1	1	1	1	1	1	1	1	1	1	1	1	1
rpoB		DNA-directed RNA polymerase subunit beta	172	172	1	11	1015				3551	3551	3551		1	1	1	1	1	1	1	1	1	1	1	1	1	1	1	1	1	1	1	1	1	1	1	1	1	1	1	1	1	1	1	1	1	1	1
yibN		putative protein YibN	172	172	1	11	3167				386	386	386		1	1	1	1	1	1	1	1	1	1	1	1	1	1	1	1	1	1	1	1	1	1	1	1	1	1	1	1	1	1	1	1	1	1	1
group_4664		hypothetical protein	172	172	1	11	5641				1577	1577	1577		1	1	1	1	1	1	1	1	1	1	1	1	1	1	1	1	1	1	1	1	1	1	1	1	1	1	1	1	1	1	1	1	1	1	1
group_4667		hypothetical protein	172	172	1	11	5101				377	377	377		1	1	1	1	1	1	1	1	1	1	1	1	1	1	1	1	1	1	1	1	1	1	1	1	1	1	1	1	1	1	1	1	1	1	1
group_4668		hypothetical protein	172	172	1	11	5877				233	233	233		1	1	1	1	1	1	1	1	1	1	1	1	1	1	1	1	1	1	1	1	1	1	1	1	1	1	1	1	1	1	1	1	1	1	1
cysE		Serine acetyltransferase	172	172	1	11	1002				680	680	680		1	1	1	1	1	1	1	1	1	1	1	1	1	1	1	1	1	1	1	1	1	1	1	1	1	1	1	1	1	1	1	1	1	1	1
pheS		Phenylalanine--tRNA ligase alpha subunit	172	172	1	11	3946				1058	1058	1058		1	1	1	1	1	1	1	1	1	1	1	1	1	1	1	1	1	1	1	1	1	1	1	1	1	1	1	1	1	1	1	1	1	1	1
katA		Catalase	172	172	1	11	3431				1517	1517	1517		1	1	1	1	1	1	1	1	1	1	1	1	1	1	1	1	1	1	1	1	1	1	1	1	1	1	1	1	1	1	1	1	1	1	1
glmS		Glutamine--fructose-6-phosphate aminotransferase [isomerizing]	172	172	1	11	3797				1805	1805	1805		1	1	1	1	1	1	1	1	1	1	1	1	1	1	1	1	1	1	1	1	1	1	1	1	1	1	1	1	1	1	1	1	1	1	1
isdE		High-affinity heme uptake system protein IsdE	172	172	1	11	3951				878	878	878		1	1	1	1	1	1	1	1	1	1	1	1	1	1	1	1	1	1	1	1	1	1	1	1	1	1	1	1	1	1	1	1	1	1	1
whiA		putative cell division protein WhiA	172	172	1	11	1425				944	944	944		1	1	1	1	1	1	1	1	1	1	1	1	1	1	1	1	1	1	1	1	1	1	1	1	1	1	1	1	1	1	1	1	1	1	1
opuCB		Carnitine transport permease protein OpuCB	172	172	1	11	5655				635	635	635		1	1	1	1	1	1	1	1	1	1	1	1	1	1	1	1	1	1	1	1	1	1	1	1	1	1	1	1	1	1	1	1	1	1	1
cntA		Metal-staphylopine-binding protein CntA	172	172	1	11	5633				1598	1598	1598		1	1	1	1	1	1	1	1	1	1	1	1	1	1	1	1	1	1	1	1	1	1	1	1	1	1	1	1	1	1	1	1	1	1	1
alaS		Alanine--tRNA ligase	172	172	1	11	3085				2630	2633	2630		1	1	1	1	1	1	1	1	1	1	1	1	1	1	1	1	1	1	1	1	1	1	1	1	1	1	1	1	1	1	1	1	1	1	1
ftsH		ATP-dependent zinc metalloprotease FtsH	172	172	1	12	22				2093	2093	2093		1	1	1	1	1	1	1	1	1	1	1	1	1	1	1	1	1	1	1	1	1	1	1	1	1	1	1	1	1	1	1	1	1	1	1
putB		Proline dehydrogenase 2	172	172	1	11	2831				1001	1001	1001		1	1	1	1	1	1	1	1	1	1	1	1	1	1	1	1	1	1	1	1	1	1	1	1	1	1	1	1	1	1	1	1	1	1	1
group_4689		hypothetical protein	172	172	1	11	5094				1010	1010	1010		1	1	1	1	1	1	1	1	1	1	1	1	1	1	1	1	1	1	1	1	1	1	1	1	1	1	1	1	1	1	1	1	1	1	1
group_4690		hypothetical protein	172	172	1	11	5705				1547	1550	1547		1	1	1	1	1	1	1	1	1	1	1	1	1	1	1	1	1	1	1	1	1	1	1	1	1	1	1	1	1	1	1	1	1	1	1
rimP		Ribosome maturation factor RimP	172	172	1	11	3676				467	467	467		1	1	1	1	1	1	1	1	1	1	1	1	1	1	1	1	1	1	1	1	1	1	1	1	1	1	1	1	1	1	1	1	1	1	1
bceA_1		Bacitracin export ATP-binding protein BceA	172	172	1	11	4940				758	758	758		1	1	1	1	1	1	1	1	1	1	1	1	1	1	1	1	1	1	1	1	1	1	1	1	1	1	1	1	1	1	1	1	1	1	1
group_4695		putative AAA domain-containing protein	172	172	1	11	3076				1274	1274	1274		1	1	1	1	1	1	1	1	1	1	1	1	1	1	1	1	1	1	1	1	1	1	1	1	1	1	1	1	1	1	1	1	1	1	1
sarA		Transcriptional regulator SarA	172	172	1	11	1208				374	374	374		1	1	1	1	1	1	1	1	1	1	1	1	1	1	1	1	1	1	1	1	1	1	1	1	1	1	1	1	1	1	1	1	1	1	1
group_4699		hypothetical protein	172	172	1	11	1366				584	584	584		1	1	1	1	1	1	1	1	1	1	1	1	1	1	1	1	1	1	1	1	1	1	1	1	1	1	1	1	1	1	1	1	1	1	1
sauU		putative sulfoacetate transporter SauU	172	172	1	11	5174				1277	1277	1277		1	1	1	1	1	1	1	1	1	1	1	1	1	1	1	1	1	1	1	1	1	1	1	1	1	1	1	1	1	1	1	1	1	1	1
rpsB		30S ribosomal protein S2	172	172	1	11	3685				767	767	767		1	1	1	1	1	1	1	1	1	1	1	1	1	1	1	1	1	1	1	1	1	1	1	1	1	1	1	1	1	1	1	1	1	1	1
tadA_1		tRNA-specific adenosine deaminase	172	172	1	11	3114				431	431	431		1	1	1	1	1	1	1	1	1	1	1	1	1	1	1	1	1	1	1	1	1	1	1	1	1	1	1	1	1	1	1	1	1	1	1
group_4705		hypothetical protein	172	172	1	11	4213				494	494	494		1	1	1	1	1	1	1	1	1	1	1	1	1	1	1	1	1	1	1	1	1	1	1	1	1	1	1	1	1	1	1	1	1	1	1
pxpB_2		5-oxoprolinase subunit B	172	172	1	11	1373				710	710	710		1	1	1	1	1	1	1	1	1	1	1	1	1	1	1	1	1	1	1	1	1	1	1	1	1	1	1	1	1	1	1	1	1	1	1
gmk		Guanylate kinase	172	172	1	11	3736				623	623	623		1	1	1	1	1	1	1	1	1	1	1	1	1	1	1	1	1	1	1	1	1	1	1	1	1	1	1	1	1	1	1	1	1	1	1
queC		7-cyano-7-deazaguanine synthase	172	172	1	11	1369				668	668	668		1	1	1	1	1	1	1	1	1	1	1	1	1	1	1	1	1	1	1	1	1	1	1	1	1	1	1	1	1	1	1	1	1	1	1
umuC		Protein UmuC	172	172	1	11	3400				1262	1262	1262		1	1	1	1	1	1	1	1	1	1	1	1	1	1	1	1	1	1	1	1	1	1	1	1	1	1	1	1	1	1	1	1	1	1	1
pucK		Uric acid permease PucK	172	172	1	11	4427				1268	1268	1268		1	1	1	1	1	1	1	1	1	1	1	1	1	1	1	1	1	1	1	1	1	1	1	1	1	1	1	1	1	1	1	1	1	1	1
group_4712		hypothetical protein	172	172	1	11	5820				968	968	968		1	1	1	1	1	1	1	1	1	1	1	1	1	1	1	1	1	1	1	1	1	1	1	1	1	1	1	1	1	1	1	1	1	1	1
deoD		Purine nucleoside phosphorylase DeoD-type	172	172	1	11	4776				707	707	707		1	1	1	1	1	1	1	1	1	1	1	1	1	1	1	1	1	1	1	1	1	1	1	1	1	1	1	1	1	1	1	1	1	1	1
dinB		DNA polymerase IV	172	172	1	11	1977				1070	1070	1070		1	1	1	1	1	1	1	1	1	1	1	1	1	1	1	1	1	1	1	1	1	1	1	1	1	1	1	1	1	1	1	1	1	1	1
priA		primosomal protein N'	172	172	1	11	3733				2408	2408	2408		1	1	1	1	1	1	1	1	1	1	1	1	1	1	1	1	1	1	1	1	1	1	1	1	1	1	1	1	1	1	1	1	1	1	1
rpsT		30S ribosomal protein S20	172	172	1	11	3117				251	251	251		1	1	1	1	1	1	1	1	1	1	1	1	1	1	1	1	1	1	1	1	1	1	1	1	1	1	1	1	1	1	1	1	1	1	1
group_4720		hypothetical protein	172	172	1	11	5799				944	944	944		1	1	1	1	1	1	1	1	1	1	1	1	1	1	1	1	1	1	1	1	1	1	1	1	1	1	1	1	1	1	1	1	1	1	1
apt		Adenine phosphoribosyltransferase	172	172	1	11	3069				518	518	518		1	1	1	1	1	1	1	1	1	1	1	1	1	1	1	1	1	1	1	1	1	1	1	1	1	1	1	1	1	1	1	1	1	1	1
ptpB		Low molecular weight protein-tyrosine-phosphatase PtpB	172	172	1	11	3832				419	419	419		1	1	1	1	1	1	1	1	1	1	1	1	1	1	1	1	1	1	1	1	1	1	1	1	1	1	1	1	1	1	1	1	1	1	1
pflA		Pyruvate formate-lyase-activating enzyme	172	172	1	11	4651				755	755	755		1	1	1	1	1	1	1	1	1	1	1	1	1	1	1	1	1	1	1	1	1	1	1	1	1	1	1	1	1	1	1	1	1	1	1
group_4729		hypothetical protein	172	172	1	11	3978				482	482	482		1	1	1	1	1	1	1	1	1	1	1	1	1	1	1	1	1	1	1	1	1	1	1	1	1	1	1	1	1	1	1	1	1	1	1
glnQ		Glutamine transport ATP-binding protein GlnQ	172	172	1	11	4770				773	773	773		1	1	1	1	1	1	1	1	1	1	1	1	1	1	1	1	1	1	1	1	1	1	1	1	1	1	1	1	1	1	1	1	1	1	1
rpmG2_1		50S ribosomal protein L33 2	172	172	1	11	3151				149	149	149		1	1	1	1	1	1	1	1	1	1	1	1	1	1	1	1	1	1	1	1	1	1	1	1	1	1	1	1	1	1	1	1	1	1	1
slyA_2		Transcriptional regulator SlyA	172	172	1	11	4039				419	419	419		1	1	1	1	1	1	1	1	1	1	1	1	1	1	1	1	1	1	1	1	1	1	1	1	1	1	1	1	1	1	1	1	1	1	1
rplC		50S ribosomal protein L3	172	172	1	11	130				662	662	662		1	1	1	1	1	1	1	1	1	1	1	1	1	1	1	1	1	1	1	1	1	1	1	1	1	1	1	1	1	1	1	1	1	1	1
rodA		Peptidoglycan glycosyltransferase RodA	172	172	1	11	3865				1202	1202	1202		1	1	1	1	1	1	1	1	1	1	1	1	1	1	1	1	1	1	1	1	1	1	1	1	1	1	1	1	1	1	1	1	1	1	1
group_4738		hypothetical protein	172	172	1	11	2835				953	953	953		1	1	1	1	1	1	1	1	1	1	1	1	1	1	1	1	1	1	1	1	1	1	1	1	1	1	1	1	1	1	1	1	1	1	1
hisS		Histidine--tRNA ligase	172	172	1	11	3073				1262	1262	1262		1	1	1	1	1	1	1	1	1	1	1	1	1	1	1	1	1	1	1	1	1	1	1	1	1	1	1	1	1	1	1	1	1	1	1
group_4741		hypothetical protein	172	172	1	11	3072				875	875	875		1	1	1	1	1	1	1	1	1	1	1	1	1	1	1	1	1	1	1	1	1	1	1	1	1	1	1	1	1	1	1	1	1	1	1
pdhA		Pyruvate dehydrogenase E1 component subunit alpha	172	172	1	11	3996				1112	1112	1112		1	1	1	1	1	1	1	1	1	1	1	1	1	1	1	1	1	1	1	1	1	1	1	1	1	1	1	1	1	1	1	1	1	1	1
hslV		ATP-dependent protease subunit HslV	172	172	1	11	3688				545	545	545		1	1	1	1	1	1	1	1	1	1	1	1	1	1	1	1	1	1	1	1	1	1	1	1	1	1	1	1	1	1	1	1	1	1	1
group_4748		hypothetical protein	172	172	1	11	2704				365	365	365		1	1	1	1	1	1	1	1	1	1	1	1	1	1	1	1	1	1	1	1	1	1	1	1	1	1	1	1	1	1	1	1	1	1	1
group_4749		hypothetical protein	172	172	1	11	1273				506	506	506		1	1	1	1	1	1	1	1	1	1	1	1	1	1	1	1	1	1	1	1	1	1	1	1	1	1	1	1	1	1	1	1	1	1	1
mcsA		Protein-arginine kinase activator protein	172	172	1	11	996				566	566	566		1	1	1	1	1	1	1	1	1	1	1	1	1	1	1	1	1	1	1	1	1	1	1	1	1	1	1	1	1	1	1	1	1	1	1
group_4751		hypothetical protein	172	177	1.03	11	1133				452	452	452		1	1	1	1	1	1	1	1	1	1	1	1	1	1	1	1	1	1	1	1	1	1	1	1	1	1	1	1	1	1	1	1	1	1	1
groL		60 kDa chaperonin	172	172	1	11	1515				1616	1616	1616		1	1	1	1	1	1	1	1	1	1	1	1	1	1	1	1	1	1	1	1	1	1	1	1	1	1	1	1	1	1	1	1	1	1	1
glpQ_2		Glycerophosphodiester phosphodiesterase	172	172	1	11	4137				929	929	929		1	1	1	1	1	1	1	1	1	1	1	1	1	1	1	1	1	1	1	1	1	1	1	1	1	1	1	1	1	1	1	1	1	1	1
yqeN		putative protein YqeN	172	172	1	11	3116				974	974	974		1	1	1	1	1	1	1	1	1	1	1	1	1	1	1	1	1	1	1	1	1	1	1	1	1	1	1	1	1	1	1	1	1	1	1
mnhE1		Na(+)/H(+) antiporter subunit E1	172	172	1	11	4149				479	479	479		1	1	1	1	1	1	1	1	1	1	1	1	1	1	1	1	1	1	1	1	1	1	1	1	1	1	1	1	1	1	1	1	1	1	1
group_4764		hypothetical protein	172	172	1	11	1963				275	275	275		1	1	1	1	1	1	1	1	1	1	1	1	1	1	1	1	1	1	1	1	1	1	1	1	1	1	1	1	1	1	1	1	1	1	1
mutS2		Endonuclease MutS2	172	172	1	11	3940				2348	2348	2348		1	1	1	1	1	1	1	1	1	1	1	1	1	1	1	1	1	1	1	1	1	1	1	1	1	1	1	1	1	1	1	1	1	1	1
group_4767		hypothetical protein	172	172	1	11	2693				1112	1112	1112		1	1	1	1	1	1	1	1	1	1	1	1	1	1	1	1	1	1	1	1	1	1	1	1	1	1	1	1	1	1	1	1	1	1	1
rplL		50S ribosomal protein L7/L12	172	172	1	11	1013				368	368	368		1	1	1	1	1	1	1	1	1	1	1	1	1	1	1	1	1	1	1	1	1	1	1	1	1	1	1	1	1	1	1	1	1	1	1
thrC		Threonine synthase	172	172	1	11	3436				1061	1061	1061		1	1	1	1	1	1	1	1	1	1	1	1	1	1	1	1	1	1	1	1	1	1	1	1	1	1	1	1	1	1	1	1	1	1	1
pycA		Pyruvate carboxylase	172	172	1	11	3975				3452	3452	3452		1	1	1	1	1	1	1	1	1	1	1	1	1	1	1	1	1	1	1	1	1	1	1	1	1	1	1	1	1	1	1	1	1	1	1
treP_1		PTS system trehalose-specific EIIBC component	172	172	1	11	5798				1442	1442	1442		1	1	1	1	1	1	1	1	1	1	1	1	1	1	1	1	1	1	1	1	1	1	1	1	1	1	1	1	1	1	1	1	1	1	1
group_4774		hypothetical protein	172	172	1	11	3075				773	773	773		1	1	1	1	1	1	1	1	1	1	1	1	1	1	1	1	1	1	1	1	1	1	1	1	1	1	1	1	1	1	1	1	1	1	1
uhpT		Hexose-6-phosphate:phosphate antiporter	172	172	1	11	4656				1379	1379	1379		1	1	1	1	1	1	1	1	1	1	1	1	1	1	1	1	1	1	1	1	1	1	1	1	1	1	1	1	1	1	1	1	1	1	1
group_4777		hypothetical protein	172	172	1	11	4657				494	494	494		1	1	1	1	1	1	1	1	1	1	1	1	1	1	1	1	1	1	1	1	1	1	1	1	1	1	1	1	1	1	1	1	1	1	1
phnD2		putative ABC transporter phosphonate/phosphite binding protein PhnD2	172	172	1	11	4769				956	956	956		1	1	1	1	1	1	1	1	1	1	1	1	1	1	1	1	1	1	1	1	1	1	1	1	1	1	1	1	1	1	1	1	1	1	1
noc		Nucleoid occlusion protein	172	172	1	11	4930				839	839	839		1	1	1	1	1	1	1	1	1	1	1	1	1	1	1	1	1	1	1	1	1	1	1	1	1	1	1	1	1	1	1	1	1	1	1
codY		GTP-sensing transcriptional pleiotropic repressor CodY	172	172	1	11	3686				773	773	773		1	1	1	1	1	1	1	1	1	1	1	1	1	1	1	1	1	1	1	1	1	1	1	1	1	1	1	1	1	1	1	1	1	1	1
bsaA_1		Glutathione peroxidase BsaA	172	172	1	11	3485				476	476	476		1	1	1	1	1	1	1	1	1	1	1	1	1	1	1	1	1	1	1	1	1	1	1	1	1	1	1	1	1	1	1	1	1	1	1
gnd		6-phosphogluconate dehydrogenase, decarboxylating	172	172	1	11	3192				1406	1406	1406		1	1	1	1	1	1	1	1	1	1	1	1	1	1	1	1	1	1	1	1	1	1	1	1	1	1	1	1	1	1	1	1	1	1	1
patA		Peptidoglycan O-acetyltransferase	172	172	1	11	4164				1214	1214	1214		1	1	1	1	1	1	1	1	1	1	1	1	1	1	1	1	1	1	1	1	1	1	1	1	1	1	1	1	1	1	1	1	1	1	1
group_4792		hypothetical protein	172	172	1	11	1436				458	458	458		1	1	1	1	1	1	1	1	1	1	1	1	1	1	1	1	1	1	1	1	1	1	1	1	1	1	1	1	1	1	1	1	1	1	1
group_4795		hypothetical protein	172	172	1	11	3500				866	866	866		1	1	1	1	1	1	1	1	1	1	1	1	1	1	1	1	1	1	1	1	1	1	1	1	1	1	1	1	1	1	1	1	1	1	1
group_4797		hypothetical protein	172	172	1	11	4430				662	662	662		1	1	1	1	1	1	1	1	1	1	1	1	1	1	1	1	1	1	1	1	1	1	1	1	1	1	1	1	1	1	1	1	1	1	1
moaA		GTP 3',8-cyclase	172	172	1	11	148				1022	1022	1022		1	1	1	1	1	1	1	1	1	1	1	1	1	1	1	1	1	1	1	1	1	1	1	1	1	1	1	1	1	1	1	1	1	1	1
gtfA_3		UDP-N-acetylglucosamine--peptide N-acetylglucosaminyltransferase GtfA subunit	172	177	1.03	11	1063				1472	1472	1472		1	1	1	1	1	1	1	1	1	1	1	1	1	1	1	1	1	1	1	1	1	1	1	1	1	1	1	1	1	1	1	1	1	1	1
metE		5-methyltetrahydropteroyltriglutamate--homocysteine methyltransferase	172	172	1	11	4463				2228	2228	2228		1	1	1	1	1	1	1	1	1	1	1	1	1	1	1	1	1	1	1	1	1	1	1	1	1	1	1	1	1	1	1	1	1	1	1
ezrA		Septation ring formation regulator EzrA	172	172	1	11	2885				1694	1694	1694		1	1	1	1	1	1	1	1	1	1	1	1	1	1	1	1	1	1	1	1	1	1	1	1	1	1	1	1	1	1	1	1	1	1	1
perR		Peroxide-responsive repressor PerR	172	172	1	11	1917				446	446	446		1	1	1	1	1	1	1	1	1	1	1	1	1	1	1	1	1	1	1	1	1	1	1	1	1	1	1	1	1	1	1	1	1	1	1
rplD		50S ribosomal protein L4	172	172	1	11	129				623	623	623		1	1	1	1	1	1	1	1	1	1	1	1	1	1	1	1	1	1	1	1	1	1	1	1	1	1	1	1	1	1	1	1	1	1	1
yiiM		Protein YiiM	172	172	1	11	5846				653	653	653		1	1	1	1	1	1	1	1	1	1	1	1	1	1	1	1	1	1	1	1	1	1	1	1	1	1	1	1	1	1	1	1	1	1	1
yfiC		tRNA1(Val) (adenine(37)-N6)-methyltransferase	172	172	1	12	7				725	725	725		1	1	1	1	1	1	1	1	1	1	1	1	1	1	1	1	1	1	1	1	1	1	1	1	1	1	1	1	1	1	1	1	1	1	1
rplS		50S ribosomal protein L19	172	172	1	11	3702				350	350	350		1	1	1	1	1	1	1	1	1	1	1	1	1	1	1	1	1	1	1	1	1	1	1	1	1	1	1	1	1	1	1	1	1	1	1
hemE		Uroporphyrinogen decarboxylase	172	172	1	11	2710				1037	1037	1037		1	1	1	1	1	1	1	1	1	1	1	1	1	1	1	1	1	1	1	1	1	1	1	1	1	1	1	1	1	1	1	1	1	1	1
rlmN		putative dual-specificity RNA methyltransferase RlmN	172	172	1	11	3725				1094	1094	1094		1	1	1	1	1	1	1	1	1	1	1	1	1	1	1	1	1	1	1	1	1	1	1	1	1	1	1	1	1	1	1	1	1	1	1
lacD		Tagatose 1,6-diphosphate aldolase	172	172	1	11	65				980	980	980		1	1	1	1	1	1	1	1	1	1	1	1	1	1	1	1	1	1	1	1	1	1	1	1	1	1	1	1	1	1	1	1	1	1	1
group_4816		hypothetical protein	172	172	1	11	3061				455	458	457		1	1	1	1	1	1	1	1	1	1	1	1	1	1	1	1	1	1	1	1	1	1	1	1	1	1	1	1	1	1	1	1	1	1	1
glyQS		Glycine--tRNA ligase	172	172	1	11	3137				1391	1391	1391		1	1	1	1	1	1	1	1	1	1	1	1	1	1	1	1	1	1	1	1	1	1	1	1	1	1	1	1	1	1	1	1	1	1	1
tig		Trigger factor	172	172	1	11	3037				1301	1301	1301		1	1	1	1	1	1	1	1	1	1	1	1	1	1	1	1	1	1	1	1	1	1	1	1	1	1	1	1	1	1	1	1	1	1	1
dapH_1		2,3,4,5-tetrahydropyridine-2,6-dicarboxylate N-acetyltransferase	172	172	1	11	3366				719	719	719		1	1	1	1	1	1	1	1	1	1	1	1	1	1	1	1	1	1	1	1	1	1	1	1	1	1	1	1	1	1	1	1	1	1	1
frdA		Fumarate reductase flavoprotein subunit	172	172	1	11	3936				1766	1766	1766		1	1	1	1	1	1	1	1	1	1	1	1	1	1	1	1	1	1	1	1	1	1	1	1	1	1	1	1	1	1	1	1	1	1	1
fur		Ferric uptake regulation protein	172	172	1	11	3205				449	449	449		1	1	1	1	1	1	1	1	1	1	1	1	1	1	1	1	1	1	1	1	1	1	1	1	1	1	1	1	1	1	1	1	1	1	1
rho		Transcription termination factor Rho	172	172	1	11	3826				1316	1316	1316		1	1	1	1	1	1	1	1	1	1	1	1	1	1	1	1	1	1	1	1	1	1	1	1	1	1	1	1	1	1	1	1	1	1	1
group_4828		Putative dipeptidase	172	172	1	11	2848				1409	1409	1409		1	1	1	1	1	1	1	1	1	1	1	1	1	1	1	1	1	1	1	1	1	1	1	1	1	1	1	1	1	1	1	1	1	1	1
dat		D-alanine aminotransferase	172	172	1	11	2849				848	848	848		1	1	1	1	1	1	1	1	1	1	1	1	1	1	1	1	1	1	1	1	1	1	1	1	1	1	1	1	1	1	1	1	1	1	1
adh		Alcohol dehydrogenase	172	172	1	11	1197				1010	1010	1010		1	1	1	1	1	1	1	1	1	1	1	1	1	1	1	1	1	1	1	1	1	1	1	1	1	1	1	1	1	1	1	1	1	1	1
tmk		Thymidylate kinase	172	172	1	12	2				617	617	617		1	1	1	1	1	1	1	1	1	1	1	1	1	1	1	1	1	1	1	1	1	1	1	1	1	1	1	1	1	1	1	1	1	1	1
group_4833		hypothetical protein	172	172	1	11	3424				239	239	239		1	1	1	1	1	1	1	1	1	1	1	1	1	1	1	1	1	1	1	1	1	1	1	1	1	1	1	1	1	1	1	1	1	1	1
group_4835		hypothetical protein	172	172	1	11	3058				320	320	320		1	1	1	1	1	1	1	1	1	1	1	1	1	1	1	1	1	1	1	1	1	1	1	1	1	1	1	1	1	1	1	1	1	1	1
hemA		Glutamyl-tRNA reductase	172	172	1	11	3040				1346	1346	1346		1	1	1	1	1	1	1	1	1	1	1	1	1	1	1	1	1	1	1	1	1	1	1	1	1	1	1	1	1	1	1	1	1	1	1
adk		Adenylate kinase	172	172	1	11	108				647	647	647		1	1	1	1	1	1	1	1	1	1	1	1	1	1	1	1	1	1	1	1	1	1	1	1	1	1	1	1	1	1	1	1	1	1	1
lctP_2		L-lactate permease	172	172	1	11	5812				1598	1598	1598		1	1	1	1	1	1	1	1	1	1	1	1	1	1	1	1	1	1	1	1	1	1	1	1	1	1	1	1	1	1	1	1	1	1	1
group_4845		hypothetical protein	172	172	1	11	1251				752	752	752		1	1	1	1	1	1	1	1	1	1	1	1	1	1	1	1	1	1	1	1	1	1	1	1	1	1	1	1	1	1	1	1	1	1	1
murA2		UDP-N-acetylglucosamine 1-carboxyvinyltransferase 2	172	172	1	11	3823				1259	1259	1259		1	1	1	1	1	1	1	1	1	1	1	1	1	1	1	1	1	1	1	1	1	1	1	1	1	1	1	1	1	1	1	1	1	1	1
steT		Serine/threonine exchanger SteT	172	172	1	11	3316				1322	1322	1322		1	1	1	1	1	1	1	1	1	1	1	1	1	1	1	1	1	1	1	1	1	1	1	1	1	1	1	1	1	1	1	1	1	1	1
group_4848		hypothetical protein	172	172	1	11	3338				221	221	221		1	1	1	1	1	1	1	1	1	1	1	1	1	1	1	1	1	1	1	1	1	1	1	1	1	1	1	1	1	1	1	1	1	1	1
mazF		Endoribonuclease MazF	172	172	1	11	3759				362	362	362		1	1	1	1	1	1	1	1	1	1	1	1	1	1	1	1	1	1	1	1	1	1	1	1	1	1	1	1	1	1	1	1	1	1	1
ptsI		Phosphoenolpyruvate-protein phosphotransferase	172	172	1	11	4005				1718	1718	1718		1	1	1	1	1	1	1	1	1	1	1	1	1	1	1	1	1	1	1	1	1	1	1	1	1	1	1	1	1	1	1	1	1	1	1
group_4852		hypothetical protein	172	172	1	11	3358				623	623	623		1	1	1	1	1	1	1	1	1	1	1	1	1	1	1	1	1	1	1	1	1	1	1	1	1	1	1	1	1	1	1	1	1	1	1
betA		Oxygen-dependent choline dehydrogenase	172	172	1	11	5059				1709	1709	1709		1	1	1	1	1	1	1	1	1	1	1	1	1	1	1	1	1	1	1	1	1	1	1	1	1	1	1	1	1	1	1	1	1	1	1
ltaE		Low specificity L-threonine aldolase	172	172	1	11	3452				1025	1025	1025		1	1	1	1	1	1	1	1	1	1	1	1	1	1	1	1	1	1	1	1	1	1	1	1	1	1	1	1	1	1	1	1	1	1	1
group_4857		hypothetical protein	172	172	1	11	5872				692	692	692		1	1	1	1	1	1	1	1	1	1	1	1	1	1	1	1	1	1	1	1	1	1	1	1	1	1	1	1	1	1	1	1	1	1	1
opuD_2		Glycine betaine transporter OpuD	172	172	1	11	3416				1646	1646	1646		1	1	1	1	1	1	1	1	1	1	1	1	1	1	1	1	1	1	1	1	1	1	1	1	1	1	1	1	1	1	1	1	1	1	1
group_486		hypothetical protein	172	177	1.03	11	1127				377	380	379		1	1	1	1	1	1	1	1	1	1	1	1	1	1	1	1	1	1	1	1	1	1	1	1	1	1	1	1	1	1	1	1	1	1	1
ureB		Urease subunit beta	172	172	1	11	168				410	410	410		1	1	1	1	1	1	1	1	1	1	1	1	1	1	1	1	1	1	1	1	1	1	1	1	1	1	1	1	1	1	1	1	1	1	1
srrA		Transcriptional regulatory protein SrrA	172	172	1	11	3211				725	725	725		1	1	1	1	1	1	1	1	1	1	1	1	1	1	1	1	1	1	1	1	1	1	1	1	1	1	1	1	1	1	1	1	1	1	1
lacC_2		Tagatose-6-phosphate kinase	172	172	1	11	1354				920	920	920		1	1	1	1	1	1	1	1	1	1	1	1	1	1	1	1	1	1	1	1	1	1	1	1	1	1	1	1	1	1	1	1	1	1	1
oppB		Oligopeptide transport system permease protein OppB	172	172	1	11	4109				926	926	926		1	1	1	1	1	1	1	1	1	1	1	1	1	1	1	1	1	1	1	1	1	1	1	1	1	1	1	1	1	1	1	1	1	1	1
rsmD		Ribosomal RNA small subunit methyltransferase D	172	172	1	11	3966				542	542	542		1	1	1	1	1	1	1	1	1	1	1	1	1	1	1	1	1	1	1	1	1	1	1	1	1	1	1	1	1	1	1	1	1	1	1
rlhA		23S rRNA 5-hydroxycytidine synthase	172	172	1	11	3090				923	923	923		1	1	1	1	1	1	1	1	1	1	1	1	1	1	1	1	1	1	1	1	1	1	1	1	1	1	1	1	1	1	1	1	1	1	1
norB_3		Quinolone resistance protein NorB	172	172	1	11	5658				1400	1400	1400		1	1	1	1	1	1	1	1	1	1	1	1	1	1	1	1	1	1	1	1	1	1	1	1	1	1	1	1	1	1	1	1	1	1	1
oppC		Oligopeptide transport system permease protein OppC	172	172	1	11	4108				1070	1070	1070		1	1	1	1	1	1	1	1	1	1	1	1	1	1	1	1	1	1	1	1	1	1	1	1	1	1	1	1	1	1	1	1	1	1	1
bsaA_2		Glutathione peroxidase BsaA	172	172	1	11	5049				497	497	497		1	1	1	1	1	1	1	1	1	1	1	1	1	1	1	1	1	1	1	1	1	1	1	1	1	1	1	1	1	1	1	1	1	1	1
ureD1		Urease accessory protein UreD	172	172	1	11	5891				836	836	836		1	1	1	1	1	1	1	1	1	1	1	1	1	1	1	1	1	1	1	1	1	1	1	1	1	1	1	1	1	1	1	1	1	1	1
ung		Uracil-DNA glycosylase	172	177	1.03	11	1126				656	656	656		1	1	1	1	1	1	1	1	1	1	1	1	1	1	1	1	1	1	1	1	1	1	1	1	1	1	1	1	1	1	1	1	1	1	1
yitU		5-amino-6-(5-phospho-D-ribitylamino)uracil phosphatase YitU	172	172	1	11	4125				824	824	824		1	1	1	1	1	1	1	1	1	1	1	1	1	1	1	1	1	1	1	1	1	1	1	1	1	1	1	1	1	1	1	1	1	1	1
ndk		Nucleoside diphosphate kinase	172	172	1	11	3283				449	449	449		1	1	1	1	1	1	1	1	1	1	1	1	1	1	1	1	1	1	1	1	1	1	1	1	1	1	1	1	1	1	1	1	1	1	1
nrdE		Ribonucleoside-diphosphate reductase subunit alpha	172	172	1	11	1389				2105	2105	2105		1	1	1	1	1	1	1	1	1	1	1	1	1	1	1	1	1	1	1	1	1	1	1	1	1	1	1	1	1	1	1	1	1	1	1
srrB		Sensor protein SrrB	172	172	1	11	3212				1751	1751	1751		1	1	1	1	1	1	1	1	1	1	1	1	1	1	1	1	1	1	1	1	1	1	1	1	1	1	1	1	1	1	1	1	1	1	1
yfbR		5'-deoxynucleotidase YfbR	172	172	1	11	1414				650	650	650		1	1	1	1	1	1	1	1	1	1	1	1	1	1	1	1	1	1	1	1	1	1	1	1	1	1	1	1	1	1	1	1	1	1	1
cpdA_2		3',5'-cyclic adenosine monophosphate phosphodiesterase CpdA	172	172	1	11	2698				1196	1196	1196		1	1	1	1	1	1	1	1	1	1	1	1	1	1	1	1	1	1	1	1	1	1	1	1	1	1	1	1	1	1	1	1	1	1	1
group_4895		hypothetical protein	172	172	1	11	3991				539	539	539		1	1	1	1	1	1	1	1	1	1	1	1	1	1	1	1	1	1	1	1	1	1	1	1	1	1	1	1	1	1	1	1	1	1	1
sufC		Vegetative protein 296	172	172	1	11	4190				761	761	761		1	1	1	1	1	1	1	1	1	1	1	1	1	1	1	1	1	1	1	1	1	1	1	1	1	1	1	1	1	1	1	1	1	1	1
walR		Transcriptional regulatory protein WalR	172	172	1	11	4906				701	701	701		1	1	1	1	1	1	1	1	1	1	1	1	1	1	1	1	1	1	1	1	1	1	1	1	1	1	1	1	1	1	1	1	1	1	1
group_4899		putative metallo-hydrolase	172	172	1	11	3156				623	623	623		1	1	1	1	1	1	1	1	1	1	1	1	1	1	1	1	1	1	1	1	1	1	1	1	1	1	1	1	1	1	1	1	1	1	1
group_4901		PhoH-like protein	172	172	1	11	3131				947	947	947		1	1	1	1	1	1	1	1	1	1	1	1	1	1	1	1	1	1	1	1	1	1	1	1	1	1	1	1	1	1	1	1	1	1	1
pyrG		CTP synthase	172	172	1	11	3820				1610	1610	1610		1	1	1	1	1	1	1	1	1	1	1	1	1	1	1	1	1	1	1	1	1	1	1	1	1	1	1	1	1	1	1	1	1	1	1
lysP_2		Lysine-specific permease	172	172	1	11	3432				1454	1454	1454		1	1	1	1	1	1	1	1	1	1	1	1	1	1	1	1	1	1	1	1	1	1	1	1	1	1	1	1	1	1	1	1	1	1	1
cntE		Staphylopine export protein	172	172	1	11	5638				1193	1193	1193		1	1	1	1	1	1	1	1	1	1	1	1	1	1	1	1	1	1	1	1	1	1	1	1	1	1	1	1	1	1	1	1	1	1	1
secY_2		Protein translocase subunit SecY	172	172	1	11	109				1292	1292	1292		1	1	1	1	1	1	1	1	1	1	1	1	1	1	1	1	1	1	1	1	1	1	1	1	1	1	1	1	1	1	1	1	1	1	1
rplF		50S ribosomal protein L6	172	172	1	11	114				536	536	536		1	1	1	1	1	1	1	1	1	1	1	1	1	1	1	1	1	1	1	1	1	1	1	1	1	1	1	1	1	1	1	1	1	1	1
cynR		HTH-type transcriptional regulator CynR	172	172	1	11	5140				863	863	863		1	1	1	1	1	1	1	1	1	1	1	1	1	1	1	1	1	1	1	1	1	1	1	1	1	1	1	1	1	1	1	1	1	1	1
group_4914		hypothetical protein	172	172	1	11	4087				347	347	347		1	1	1	1	1	1	1	1	1	1	1	1	1	1	1	1	1	1	1	1	1	1	1	1	1	1	1	1	1	1	1	1	1	1	1
hisI		Histidine biosynthesis bifunctional protein HisIE	172	172	1	11	4972				632	632	632		1	1	1	1	1	1	1	1	1	1	1	1	1	1	1	1	1	1	1	1	1	1	1	1	1	1	1	1	1	1	1	1	1	1	1
pta		Phosphate acetyltransferase	172	177	1.03	11	1146				986	986	986		1	1	1	1	1	1	1	1	1	1	1	1	1	1	1	1	1	1	1	1	1	1	1	1	1	1	1	1	1	1	1	1	1	1	1
asnS		Asparagine--tRNA ligase	172	172	1	11	3298				1292	1292	1292		1	1	1	1	1	1	1	1	1	1	1	1	1	1	1	1	1	1	1	1	1	1	1	1	1	1	1	1	1	1	1	1	1	1	1
queH		Epoxyqueuosine reductase QueH	172	172	1	11	5082				722	722	722		1	1	1	1	1	1	1	1	1	1	1	1	1	1	1	1	1	1	1	1	1	1	1	1	1	1	1	1	1	1	1	1	1	1	1
folB		Dihydroneopterin aldolase	172	172	1	12	17				365	365	365		1	1	1	1	1	1	1	1	1	1	1	1	1	1	1	1	1	1	1	1	1	1	1	1	1	1	1	1	1	1	1	1	1	1	1
gatA_2		Glutamyl-tRNA(Gln) amidotransferase subunit A	172	172	1	11	1982				1457	1457	1457		1	1	1	1	1	1	1	1	1	1	1	1	1	1	1	1	1	1	1	1	1	1	1	1	1	1	1	1	1	1	1	1	1	1	1
murC		UDP-N-acetylmuramate--L-alanine ligase	172	172	1	11	2859				1313	1313	1313		1	1	1	1	1	1	1	1	1	1	1	1	1	1	1	1	1	1	1	1	1	1	1	1	1	1	1	1	1	1	1	1	1	1	1
pth		Peptidyl-tRNA hydrolase	172	172	1	12	32				572	572	572		1	1	1	1	1	1	1	1	1	1	1	1	1	1	1	1	1	1	1	1	1	1	1	1	1	1	1	1	1	1	1	1	1	1	1
phoP		Alkaline phosphatase synthesis transcriptional regulatory protein PhoP	172	172	1	11	3020				701	704	703		1	1	1	1	1	1	1	1	1	1	1	1	1	1	1	1	1	1	1	1	1	1	1	1	1	1	1	1	1	1	1	1	1	1	1
group_4932		hypothetical protein	172	172	1	11	3104				527	527	527		1	1	1	1	1	1	1	1	1	1	1	1	1	1	1	1	1	1	1	1	1	1	1	1	1	1	1	1	1	1	1	1	1	1	1
sodM		Superoxide dismutase [Mn/Fe] 2	172	172	1	11	4781				599	599	599		1	1	1	1	1	1	1	1	1	1	1	1	1	1	1	1	1	1	1	1	1	1	1	1	1	1	1	1	1	1	1	1	1	1	1
pyrC		Dihydroorotase	172	172	1	11	3744				1277	1277	1277		1	1	1	1	1	1	1	1	1	1	1	1	1	1	1	1	1	1	1	1	1	1	1	1	1	1	1	1	1	1	1	1	1	1	1
cysQ		3'(2'),5'-bisphosphate nucleotidase CysQ	172	172	1	11	5873				797	797	797		1	1	1	1	1	1	1	1	1	1	1	1	1	1	1	1	1	1	1	1	1	1	1	1	1	1	1	1	1	1	1	1	1	1	1
yacP		putative protein YacP	172	172	1	11	1006				524	524	524		1	1	1	1	1	1	1	1	1	1	1	1	1	1	1	1	1	1	1	1	1	1	1	1	1	1	1	1	1	1	1	1	1	1	1
nth_2		Endonuclease III	172	172	1	11	1200				635	635	635		1	1	1	1	1	1	1	1	1	1	1	1	1	1	1	1	1	1	1	1	1	1	1	1	1	1	1	1	1	1	1	1	1	1	1
valS		Valine--tRNA ligase	172	172	1	11	3048				2630	2630	2630		1	1	1	1	1	1	1	1	1	1	1	1	1	1	1	1	1	1	1	1	1	1	1	1	1	1	1	1	1	1	1	1	1	1	1
aroA_1		Protein AroA(G)	172	172	1	11	2865				1091	1091	1091		1	1	1	1	1	1	1	1	1	1	1	1	1	1	1	1	1	1	1	1	1	1	1	1	1	1	1	1	1	1	1	1	1	1	1
polA		DNA polymerase I	172	172	1	11	3023				2630	2630	2630		1	1	1	1	1	1	1	1	1	1	1	1	1	1	1	1	1	1	1	1	1	1	1	1	1	1	1	1	1	1	1	1	1	1	1
ffh		Signal recognition particle protein	172	172	1	11	3706				1367	1367	1367		1	1	1	1	1	1	1	1	1	1	1	1	1	1	1	1	1	1	1	1	1	1	1	1	1	1	1	1	1	1	1	1	1	1	1
nanA		N-acetylneuraminate lyase	172	172	1	11	4519				881	881	881		1	1	1	1	1	1	1	1	1	1	1	1	1	1	1	1	1	1	1	1	1	1	1	1	1	1	1	1	1	1	1	1	1	1	1
sglT		Sodium/glucose cotransporter	172	172	1	11	4520				1532	1532	1532		1	1	1	1	1	1	1	1	1	1	1	1	1	1	1	1	1	1	1	1	1	1	1	1	1	1	1	1	1	1	1	1	1	1	1
spoVG		Putative septation protein SpoVG	172	172	1	12	36				302	302	302		1	1	1	1	1	1	1	1	1	1	1	1	1	1	1	1	1	1	1	1	1	1	1	1	1	1	1	1	1	1	1	1	1	1	1
gatC_1		PTS system galactitol-specific EIIC component	172	172	1	11	4627				1259	1259	1259		1	1	1	1	1	1	1	1	1	1	1	1	1	1	1	1	1	1	1	1	1	1	1	1	1	1	1	1	1	1	1	1	1	1	1
yhgF		Protein YhgF	172	172	1	11	3753				2138	2138	2138		1	1	1	1	1	1	1	1	1	1	1	1	1	1	1	1	1	1	1	1	1	1	1	1	1	1	1	1	1	1	1	1	1	1	1
ykoE		Putative HMP/thiamine permease protein YkoE	172	172	1	11	4013				575	575	575		1	1	1	1	1	1	1	1	1	1	1	1	1	1	1	1	1	1	1	1	1	1	1	1	1	1	1	1	1	1	1	1	1	1	1
group_4957		hypothetical protein	172	172	1	11	3155				329	329	329		1	1	1	1	1	1	1	1	1	1	1	1	1	1	1	1	1	1	1	1	1	1	1	1	1	1	1	1	1	1	1	1	1	1	1
mtnN		5'-methylthioadenosine/S-adenosylhomocysteine nucleosidase	172	172	1	11	3103				683	689	686		1	1	1	1	1	1	1	1	1	1	1	1	1	1	1	1	1	1	1	1	1	1	1	1	1	1	1	1	1	1	1	1	1	1	1
tetA		Tetracycline resistance protein, class B	172	172	1	11	1349				1166	1166	1166		1	1	1	1	1	1	1	1	1	1	1	1	1	1	1	1	1	1	1	1	1	1	1	1	1	1	1	1	1	1	1	1	1	1	1
group_4961		hypothetical protein	172	172	1	11	1402				494	494	494		1	1	1	1	1	1	1	1	1	1	1	1	1	1	1	1	1	1	1	1	1	1	1	1	1	1	1	1	1	1	1	1	1	1	1
gamR		hypothetical protein	172	172	1	11	3513				713	713	713		1	1	1	1	1	1	1	1	1	1	1	1	1	1	1	1	1	1	1	1	1	1	1	1	1	1	1	1	1	1	1	1	1	1	1
tgt		Queuine tRNA-ribosyltransferase	172	172	1	11	3065				1139	1139	1139		1	1	1	1	1	1	1	1	1	1	1	1	1	1	1	1	1	1	1	1	1	1	1	1	1	1	1	1	1	1	1	1	1	1	1
group_4966		hypothetical protein	172	172	1	11	3128				707	707	707		1	1	1	1	1	1	1	1	1	1	1	1	1	1	1	1	1	1	1	1	1	1	1	1	1	1	1	1	1	1	1	1	1	1	1
murA1		UDP-N-acetylglucosamine 1-carboxyvinyltransferase 1	172	172	1	11	3848				1265	1265	1265		1	1	1	1	1	1	1	1	1	1	1	1	1	1	1	1	1	1	1	1	1	1	1	1	1	1	1	1	1	1	1	1	1	1	1
lacA		Galactose-6-phosphate isomerase subunit LacA	172	172	1	11	69				428	428	428		1	1	1	1	1	1	1	1	1	1	1	1	1	1	1	1	1	1	1	1	1	1	1	1	1	1	1	1	1	1	1	1	1	1	1
group_4971		hypothetical protein	172	172	1	11	2013				524	524	524		1	1	1	1	1	1	1	1	1	1	1	1	1	1	1	1	1	1	1	1	1	1	1	1	1	1	1	1	1	1	1	1	1	1	1
group_4973		hypothetical protein	172	172	1	11	1995				602	602	602		1	1	1	1	1	1	1	1	1	1	1	1	1	1	1	1	1	1	1	1	1	1	1	1	1	1	1	1	1	1	1	1	1	1	1
group_4974		hypothetical protein	172	172	1	11	3088				308	308	308		1	1	1	1	1	1	1	1	1	1	1	1	1	1	1	1	1	1	1	1	1	1	1	1	1	1	1	1	1	1	1	1	1	1	1
purA		Adenylosuccinate synthetase	172	172	1	11	4907				1283	1283	1283		1	1	1	1	1	1	1	1	1	1	1	1	1	1	1	1	1	1	1	1	1	1	1	1	1	1	1	1	1	1	1	1	1	1	1
group_4978		hypothetical protein	172	172	1	11	3188				980	980	980		1	1	1	1	1	1	1	1	1	1	1	1	1	1	1	1	1	1	1	1	1	1	1	1	1	1	1	1	1	1	1	1	1	1	1
group_498		hypothetical protein	172	172	1	11	1372				608	608	608		1	1	1	1	1	1	1	1	1	1	1	1	1	1	1	1	1	1	1	1	1	1	1	1	1	1	1	1	1	1	1	1	1	1	1
nhaK_1		Sodium, potassium, lithium and rubidium/H(+) antiporter	172	172	1	11	5663				2078	2078	2078		1	1	1	1	1	1	1	1	1	1	1	1	1	1	1	1	1	1	1	1	1	1	1	1	1	1	1	1	1	1	1	1	1	1	1
rplP		50S ribosomal protein L16	172	172	1	11	123				434	434	434		1	1	1	1	1	1	1	1	1	1	1	1	1	1	1	1	1	1	1	1	1	1	1	1	1	1	1	1	1	1	1	1	1	1	1
rpmC		50S ribosomal protein L29	172	172	1	11	122				209	209	209		1	1	1	1	1	1	1	1	1	1	1	1	1	1	1	1	1	1	1	1	1	1	1	1	1	1	1	1	1	1	1	1	1	1	1
mnhD1_1		Na(+)/H(+) antiporter subunit D1	172	172	1	11	4148				1496	1496	1496		1	1	1	1	1	1	1	1	1	1	1	1	1	1	1	1	1	1	1	1	1	1	1	1	1	1	1	1	1	1	1	1	1	1	1
gluD		NAD-specific glutamate dehydrogenase	172	172	1	11	4138				1244	1244	1244		1	1	1	1	1	1	1	1	1	1	1	1	1	1	1	1	1	1	1	1	1	1	1	1	1	1	1	1	1	1	1	1	1	1	1
atpF		ATP synthase subunit b	172	172	1	11	3841				521	521	521		1	1	1	1	1	1	1	1	1	1	1	1	1	1	1	1	1	1	1	1	1	1	1	1	1	1	1	1	1	1	1	1	1	1	1
group_499		hypothetical protein	172	172	1	11	4221				269	284	282		1	1	1	1	1	1	1	1	1	1	1	1	1	1	1	1	1	1	1	1	1	1	1	1	1	1	1	1	1	1	1	1	1	1	1
mcsB		Protein-arginine kinase	172	172	1	11	997				1010	1010	1010		1	1	1	1	1	1	1	1	1	1	1	1	1	1	1	1	1	1	1	1	1	1	1	1	1	1	1	1	1	1	1	1	1	1	1
tuf		Elongation factor Tu	172	172	1	11	1021				1184	1184	1184		1	1	1	1	1	1	1	1	1	1	1	1	1	1	1	1	1	1	1	1	1	1	1	1	1	1	1	1	1	1	1	1	1	1	1
purQ		Phosphoribosylformylglycinamidine synthase subunit PurQ	172	172	1	11	4022				671	671	671		1	1	1	1	1	1	1	1	1	1	1	1	1	1	1	1	1	1	1	1	1	1	1	1	1	1	1	1	1	1	1	1	1	1	1
group_4993		hypothetical protein	172	172	1	11	2699				2936	2936	2936		1	1	1	1	1	1	1	1	1	1	1	1	1	1	1	1	1	1	1	1	1	1	1	1	1	1	1	1	1	1	1	1	1	1	1
cshB		DEAD-box ATP-dependent RNA helicase CshB	172	172	1	11	3144				1346	1346	1346		1	1	1	1	1	1	1	1	1	1	1	1	1	1	1	1	1	1	1	1	1	1	1	1	1	1	1	1	1	1	1	1	1	1	1
glpD		Aerobic glycerol-3-phosphate dehydrogenase	172	172	1	11	3489				1673	1673	1673		1	1	1	1	1	1	1	1	1	1	1	1	1	1	1	1	1	1	1	1	1	1	1	1	1	1	1	1	1	1	1	1	1	1	1
group_5000		hypothetical protein	172	177	1.03	11	1130				1484	1484	1484		1	1	1	1	1	1	1	1	1	1	1	1	1	1	1	1	1	1	1	1	1	1	1	1	1	1	1	1	1	1	1	1	1	1	1
obg		GTPase Obg	172	172	1	11	3060				1292	1292	1292		1	1	1	1	1	1	1	1	1	1	1	1	1	1	1	1	1	1	1	1	1	1	1	1	1	1	1	1	1	1	1	1	1	1	1
metP_2		Methionine import system permease protein MetP	172	172	1	11	4198				695	695	695		1	1	1	1	1	1	1	1	1	1	1	1	1	1	1	1	1	1	1	1	1	1	1	1	1	1	1	1	1	1	1	1	1	1	1
trmD		tRNA (guanine-N(1)-)-methyltransferase	172	172	1	11	3703				737	737	737		1	1	1	1	1	1	1	1	1	1	1	1	1	1	1	1	1	1	1	1	1	1	1	1	1	1	1	1	1	1	1	1	1	1	1
pyrE		Orotate phosphoribosyltransferase	172	172	1	11	3740				611	611	611		1	1	1	1	1	1	1	1	1	1	1	1	1	1	1	1	1	1	1	1	1	1	1	1	1	1	1	1	1	1	1	1	1	1	1
pbpB		Penicillin-binding protein 2B	172	172	1	11	3880				2234	2234	2234		1	1	1	1	1	1	1	1	1	1	1	1	1	1	1	1	1	1	1	1	1	1	1	1	1	1	1	1	1	1	1	1	1	1	1
rpiA		Ribose-5-phosphate isomerase A	172	172	1	11	5847				686	686	686		1	1	1	1	1	1	1	1	1	1	1	1	1	1	1	1	1	1	1	1	1	1	1	1	1	1	1	1	1	1	1	1	1	1	1
saeS		Histidine protein kinase SaeS	172	172	1	11	1362				1055	1055	1055		1	1	1	1	1	1	1	1	1	1	1	1	1	1	1	1	1	1	1	1	1	1	1	1	1	1	1	1	1	1	1	1	1	1	1
map_3		Methionine aminopeptidase	172	172	1	11	1969				758	758	758		1	1	1	1	1	1	1	1	1	1	1	1	1	1	1	1	1	1	1	1	1	1	1	1	1	1	1	1	1	1	1	1	1	1	1
group_5018		hypothetical protein	172	172	1	11	1195				1295	1295	1295		1	1	1	1	1	1	1	1	1	1	1	1	1	1	1	1	1	1	1	1	1	1	1	1	1	1	1	1	1	1	1	1	1	1	1
prfC		Peptide chain release factor 3	172	172	1	11	4070				1562	1562	1562		1	1	1	1	1	1	1	1	1	1	1	1	1	1	1	1	1	1	1	1	1	1	1	1	1	1	1	1	1	1	1	1	1	1	1
cysS		Cysteine--tRNA ligase	172	172	1	11	1003				1400	1400	1400		1	1	1	1	1	1	1	1	1	1	1	1	1	1	1	1	1	1	1	1	1	1	1	1	1	1	1	1	1	1	1	1	1	1	1
pckA		Phosphoenolpyruvate carboxykinase (ATP)	172	172	1	11	2804				1592	1592	1592		1	1	1	1	1	1	1	1	1	1	1	1	1	1	1	1	1	1	1	1	1	1	1	1	1	1	1	1	1	1	1	1	1	1	1
gatB_2		Aspartyl/glutamyl-tRNA(Asn/Gln) amidotransferase subunit B	172	172	1	11	1981				1427	1427	1427		1	1	1	1	1	1	1	1	1	1	1	1	1	1	1	1	1	1	1	1	1	1	1	1	1	1	1	1	1	1	1	1	1	1	1
lipL		Octanoyl-[GcvH]:protein N-octanoyltransferase	172	177	1.03	11	1147				836	836	836		1	1	1	1	1	1	1	1	1	1	1	1	1	1	1	1	1	1	1	1	1	1	1	1	1	1	1	1	1	1	1	1	1	1	1
mntA		Manganese-binding lipoprotein MntA	172	172	1	11	1247				929	929	929		1	1	1	1	1	1	1	1	1	1	1	1	1	1	1	1	1	1	1	1	1	1	1	1	1	1	1	1	1	1	1	1	1	1	1
cycB		Cyclodextrin-binding protein	172	172	1	11	4663				1271	1271	1271		1	1	1	1	1	1	1	1	1	1	1	1	1	1	1	1	1	1	1	1	1	1	1	1	1	1	1	1	1	1	1	1	1	1	1
ilvB		Acetolactate synthase large subunit	172	172	1	11	1459				1769	1769	1769		1	1	1	1	1	1	1	1	1	1	1	1	1	1	1	1	1	1	1	1	1	1	1	1	1	1	1	1	1	1	1	1	1	1	1
alr1_2		Alanine racemase 1	172	172	1	11	3761				1148	1148	1148		1	1	1	1	1	1	1	1	1	1	1	1	1	1	1	1	1	1	1	1	1	1	1	1	1	1	1	1	1	1	1	1	1	1	1
group_5036		hypothetical protein	172	172	1	11	2875				1274	1274	1274		1	1	1	1	1	1	1	1	1	1	1	1	1	1	1	1	1	1	1	1	1	1	1	1	1	1	1	1	1	1	1	1	1	1	1
group_5037		hypothetical protein	172	172	1	11	1978				530	530	530		1	1	1	1	1	1	1	1	1	1	1	1	1	1	1	1	1	1	1	1	1	1	1	1	1	1	1	1	1	1	1	1	1	1	1
yhaM		3'-5' exoribonuclease YhaM	172	172	1	11	2700				941	941	941		1	1	1	1	1	1	1	1	1	1	1	1	1	1	1	1	1	1	1	1	1	1	1	1	1	1	1	1	1	1	1	1	1	1	1
tcaR		HTH-type transcriptional regulator TcaR	172	172	1	11	5821				455	455	455		1	1	1	1	1	1	1	1	1	1	1	1	1	1	1	1	1	1	1	1	1	1	1	1	1	1	1	1	1	1	1	1	1	1	1
group_5043		hypothetical protein	172	172	1	11	4160				323	323	323		1	1	1	1	1	1	1	1	1	1	1	1	1	1	1	1	1	1	1	1	1	1	1	1	1	1	1	1	1	1	1	1	1	1	1
group_5044		hypothetical protein	172	172	1	11	3187				437	437	437		1	1	1	1	1	1	1	1	1	1	1	1	1	1	1	1	1	1	1	1	1	1	1	1	1	1	1	1	1	1	1	1	1	1	1
cntL		D-histidine 2-aminobutanoyltransferase	172	172	1	11	5631				818	818	818		1	1	1	1	1	1	1	1	1	1	1	1	1	1	1	1	1	1	1	1	1	1	1	1	1	1	1	1	1	1	1	1	1	1	1
oppF_2		Oligopeptide transport ATP-binding protein OppF	172	172	1	11	4106				929	941	937		1	1	1	1	1	1	1	1	1	1	1	1	1	1	1	1	1	1	1	1	1	1	1	1	1	1	1	1	1	1	1	1	1	1	1
cap8A_1		Capsular polysaccharide type 8 biosynthesis protein cap8A	172	172	1	11	4754				668	668	668		1	1	1	1	1	1	1	1	1	1	1	1	1	1	1	1	1	1	1	1	1	1	1	1	1	1	1	1	1	1	1	1	1	1	1
murJ		Lipid II flippase MurJ	172	172	1	11	2845				1661	1661	1661		1	1	1	1	1	1	1	1	1	1	1	1	1	1	1	1	1	1	1	1	1	1	1	1	1	1	1	1	1	1	1	1	1	1	1
yajC		Sec translocon accessory complex subunit YajC	172	172	1	11	3066				260	260	260		1	1	1	1	1	1	1	1	1	1	1	1	1	1	1	1	1	1	1	1	1	1	1	1	1	1	1	1	1	1	1	1	1	1	1
sucD		Succinate--CoA ligase [ADP-forming] subunit alpha	172	172	1	11	3696				908	908	908		1	1	1	1	1	1	1	1	1	1	1	1	1	1	1	1	1	1	1	1	1	1	1	1	1	1	1	1	1	1	1	1	1	1	1
lacR		Lactose phosphotransferase system repressor	172	172	1	11	70				755	755	755		1	1	1	1	1	1	1	1	1	1	1	1	1	1	1	1	1	1	1	1	1	1	1	1	1	1	1	1	1	1	1	1	1	1	1
group_5059		hypothetical protein	172	172	1	11	1921				1145	1145	1145		1	1	1	1	1	1	1	1	1	1	1	1	1	1	1	1	1	1	1	1	1	1	1	1	1	1	1	1	1	1	1	1	1	1	1
group_5061		Phosphorylated carbohydrates phosphatase	172	172	1	11	5864				635	635	635		1	1	1	1	1	1	1	1	1	1	1	1	1	1	1	1	1	1	1	1	1	1	1	1	1	1	1	1	1	1	1	1	1	1	1
mnmA		tRNA-specific 2-thiouridylase MnmA	172	172	1	11	3082				1118	1118	1118		1	1	1	1	1	1	1	1	1	1	1	1	1	1	1	1	1	1	1	1	1	1	1	1	1	1	1	1	1	1	1	1	1	1	1
group_5065		hypothetical protein	172	172	1	11	5167				1079	1079	1079		1	1	1	1	1	1	1	1	1	1	1	1	1	1	1	1	1	1	1	1	1	1	1	1	1	1	1	1	1	1	1	1	1	1	1
glmM		Phosphoglucosamine mutase	172	172	1	11	3791				1355	1355	1355		1	1	1	1	1	1	1	1	1	1	1	1	1	1	1	1	1	1	1	1	1	1	1	1	1	1	1	1	1	1	1	1	1	1	1
msmX		Oligosaccharides import ATP-binding protein MsmX	172	172	1	11	4664				1097	1097	1097		1	1	1	1	1	1	1	1	1	1	1	1	1	1	1	1	1	1	1	1	1	1	1	1	1	1	1	1	1	1	1	1	1	1	1
proS		Proline--tRNA ligase	172	172	1	11	3678				1703	1703	1703		1	1	1	1	1	1	1	1	1	1	1	1	1	1	1	1	1	1	1	1	1	1	1	1	1	1	1	1	1	1	1	1	1	1	1
menH		2-succinyl-6-hydroxy-2,4-cyclohexadiene-1-carboxylate synthase	172	172	1	11	4048				803	803	803		1	1	1	1	1	1	1	1	1	1	1	1	1	1	1	1	1	1	1	1	1	1	1	1	1	1	1	1	1	1	1	1	1	1	1
yrrK		Putative pre-16S rRNA nuclease	172	172	1	11	3087				428	428	428		1	1	1	1	1	1	1	1	1	1	1	1	1	1	1	1	1	1	1	1	1	1	1	1	1	1	1	1	1	1	1	1	1	1	1
czcD_2		Cadmium, cobalt and zinc/H(+)-K(+) antiporter	172	172	1	11	3801				977	980	977		1	1	1	1	1	1	1	1	1	1	1	1	1	1	1	1	1	1	1	1	1	1	1	1	1	1	1	1	1	1	1	1	1	1	1
group_5073		hypothetical protein	172	172	1	11	1379				1514	1514	1514		1	1	1	1	1	1	1	1	1	1	1	1	1	1	1	1	1	1	1	1	1	1	1	1	1	1	1	1	1	1	1	1	1	1	1
opuCD		Carnitine transport permease protein OpuCD	172	172	1	11	5657				695	695	695		1	1	1	1	1	1	1	1	1	1	1	1	1	1	1	1	1	1	1	1	1	1	1	1	1	1	1	1	1	1	1	1	1	1	1
galK		Galactokinase	172	177	1.03	11	1153				920	920	920		1	1	1	1	1	1	1	1	1	1	1	1	1	1	1	1	1	1	1	1	1	1	1	1	1	1	1	1	1	1	1	1	1	1	1
isdB		Iron-regulated surface determinant protein B	172	172	1	11	3955				1925	1961	1936		1	1	1	1	1	1	1	1	1	1	1	1	1	1	1	1	1	1	1	1	1	1	1	1	1	1	1	1	1	1	1	1	1	1	1
hrcA		Heat-inducible transcription repressor HrcA	172	172	1	11	3120				977	977	977		1	1	1	1	1	1	1	1	1	1	1	1	1	1	1	1	1	1	1	1	1	1	1	1	1	1	1	1	1	1	1	1	1	1	1
group_5085		hypothetical protein	172	172	1	11	3007				413	413	413		1	1	1	1	1	1	1	1	1	1	1	1	1	1	1	1	1	1	1	1	1	1	1	1	1	1	1	1	1	1	1	1	1	1	1
lysS		Lysine--tRNA ligase	172	172	1	12	15				1487	1487	1487		1	1	1	1	1	1	1	1	1	1	1	1	1	1	1	1	1	1	1	1	1	1	1	1	1	1	1	1	1	1	1	1	1	1	1
lrgB		Antiholin-like protein LrgB	172	172	1	11	4610				701	701	701		1	1	1	1	1	1	1	1	1	1	1	1	1	1	1	1	1	1	1	1	1	1	1	1	1	1	1	1	1	1	1	1	1	1	1
rpsZ		30S ribosomal protein S14 type Z	172	172	1	11	117				185	185	185		1	1	1	1	1	1	1	1	1	1	1	1	1	1	1	1	1	1	1	1	1	1	1	1	1	1	1	1	1	1	1	1	1	1	1
ypdA		Sensor histidine kinase YpdA	172	172	1	11	4613				1754	1754	1754		1	1	1	1	1	1	1	1	1	1	1	1	1	1	1	1	1	1	1	1	1	1	1	1	1	1	1	1	1	1	1	1	1	1	1
group_5092		hypothetical protein	172	172	1	11	4329				782	782	782		1	1	1	1	1	1	1	1	1	1	1	1	1	1	1	1	1	1	1	1	1	1	1	1	1	1	1	1	1	1	1	1	1	1	1
typA		GTP-binding protein TypA/BipA	172	172	1	11	3979				1847	1847	1847		1	1	1	1	1	1	1	1	1	1	1	1	1	1	1	1	1	1	1	1	1	1	1	1	1	1	1	1	1	1	1	1	1	1	1
rnpA		Ribonuclease P protein component	172	172	1	11	4926				347	347	347		1	1	1	1	1	1	1	1	1	1	1	1	1	1	1	1	1	1	1	1	1	1	1	1	1	1	1	1	1	1	1	1	1	1	1
frr		Ribosome-recycling factor	172	172	1	11	3682				554	554	554		1	1	1	1	1	1	1	1	1	1	1	1	1	1	1	1	1	1	1	1	1	1	1	1	1	1	1	1	1	1	1	1	1	1	1
isdG_2		Heme oxygenase (staphylobilin-producing) 1	172	172	1	11	3948				323	323	323		1	1	1	1	1	1	1	1	1	1	1	1	1	1	1	1	1	1	1	1	1	1	1	1	1	1	1	1	1	1	1	1	1	1	1
menA		1,4-dihydroxy-2-naphthoate octaprenyltransferase	172	172	1	11	4051				938	938	938		1	1	1	1	1	1	1	1	1	1	1	1	1	1	1	1	1	1	1	1	1	1	1	1	1	1	1	1	1	1	1	1	1	1	1
group_5098		hypothetical protein	172	172	1	11	3129				989	989	989		1	1	1	1	1	1	1	1	1	1	1	1	1	1	1	1	1	1	1	1	1	1	1	1	1	1	1	1	1	1	1	1	1	1	1
coaE		Dephospho-CoA kinase	172	172	1	11	3025				623	623	623		1	1	1	1	1	1	1	1	1	1	1	1	1	1	1	1	1	1	1	1	1	1	1	1	1	1	1	1	1	1	1	1	1	1	1
group_5102		Putative universal stress protein	172	172	1	11	3001				500	500	500		1	1	1	1	1	1	1	1	1	1	1	1	1	1	1	1	1	1	1	1	1	1	1	1	1	1	1	1	1	1	1	1	1	1	1
ald2		Alanine dehydrogenase 2	172	172	1	11	3002				1118	1118	1118		1	1	1	1	1	1	1	1	1	1	1	1	1	1	1	1	1	1	1	1	1	1	1	1	1	1	1	1	1	1	1	1	1	1	1
group_5106		hypothetical protein	172	172	1	11	3512				1265	1265	1265		1	1	1	1	1	1	1	1	1	1	1	1	1	1	1	1	1	1	1	1	1	1	1	1	1	1	1	1	1	1	1	1	1	1	1
dnaJ		Chaperone protein DnaJ	172	172	1	11	3123				1139	1139	1139		1	1	1	1	1	1	1	1	1	1	1	1	1	1	1	1	1	1	1	1	1	1	1	1	1	1	1	1	1	1	1	1	1	1	1
dprA		hypothetical protein	172	172	1	11	3692				536	872	737		1	1	1	1	1	1	1	1	1	1	1	1	1	1	1	1	1	1	1	1	1	1	1	1	1	1	1	1	1	1	1	1	1	1	1
sodA		Superoxide dismutase [Mn/Fe] 1	172	172	1	11	3149				599	599	599		1	1	1	1	1	1	1	1	1	1	1	1	1	1	1	1	1	1	1	1	1	1	1	1	1	1	1	1	1	1	1	1	1	1	1
hemL1		Glutamate-1-semialdehyde 2,1-aminomutase 1	172	172	1	11	3045				1286	1286	1286		1	1	1	1	1	1	1	1	1	1	1	1	1	1	1	1	1	1	1	1	1	1	1	1	1	1	1	1	1	1	1	1	1	1	1
rplR		50S ribosomal protein L18	172	172	1	11	113				359	359	359		1	1	1	1	1	1	1	1	1	1	1	1	1	1	1	1	1	1	1	1	1	1	1	1	1	1	1	1	1	1	1	1	1	1	1
tarL		Teichoic acid ribitol-phosphate polymerase TarL	172	172	1	11	4617				1685	1688	1687		1	1	1	1	1	1	1	1	1	1	1	1	1	1	1	1	1	1	1	1	1	1	1	1	1	1	1	1	1	1	1	1	1	1	1
group_5117		putative protein	172	172	1	11	3717				1646	1646	1646		1	1	1	1	1	1	1	1	1	1	1	1	1	1	1	1	1	1	1	1	1	1	1	1	1	1	1	1	1	1	1	1	1	1	1
rpsI		30S ribosomal protein S9	172	172	1	11	93				398	398	398		1	1	1	1	1	1	1	1	1	1	1	1	1	1	1	1	1	1	1	1	1	1	1	1	1	1	1	1	1	1	1	1	1	1	1
group_5120		hypothetical protein	172	172	1	11	4931				353	353	353		1	1	1	1	1	1	1	1	1	1	1	1	1	1	1	1	1	1	1	1	1	1	1	1	1	1	1	1	1	1	1	1	1	1	1
hslU		ATP-dependent protease ATPase subunit HslU	172	172	1	11	3687				1403	1403	1403		1	1	1	1	1	1	1	1	1	1	1	1	1	1	1	1	1	1	1	1	1	1	1	1	1	1	1	1	1	1	1	1	1	1	1
rpoC		DNA-directed RNA polymerase subunit beta'	172	172	1	11	1016				3623	3623	3623		1	1	1	1	1	1	1	1	1	1	1	1	1	1	1	1	1	1	1	1	1	1	1	1	1	1	1	1	1	1	1	1	1	1	1
group_5123		hypothetical protein	172	172	1	11	3509				827	827	827		1	1	1	1	1	1	1	1	1	1	1	1	1	1	1	1	1	1	1	1	1	1	1	1	1	1	1	1	1	1	1	1	1	1	1
mtlF		Mannitol-specific phosphotransferase enzyme IIA component	172	172	1	11	3794				434	434	434		1	1	1	1	1	1	1	1	1	1	1	1	1	1	1	1	1	1	1	1	1	1	1	1	1	1	1	1	1	1	1	1	1	1	1
aspS		Aspartate--tRNA ligase	172	172	1	11	3074				1766	1766	1766		1	1	1	1	1	1	1	1	1	1	1	1	1	1	1	1	1	1	1	1	1	1	1	1	1	1	1	1	1	1	1	1	1	1	1
group_5130		Putative 2-hydroxyacid dehydrogenase	172	172	1	11	5881				953	953	953		1	1	1	1	1	1	1	1	1	1	1	1	1	1	1	1	1	1	1	1	1	1	1	1	1	1	1	1	1	1	1	1	1	1	1
accD		Acetyl-coenzyme A carboxylase carboxyl transferase subunit beta	172	172	1	11	3013				857	857	857		1	1	1	1	1	1	1	1	1	1	1	1	1	1	1	1	1	1	1	1	1	1	1	1	1	1	1	1	1	1	1	1	1	1	1
ytpA		Phospholipase YtpA	172	172	1	11	2832				827	827	827		1	1	1	1	1	1	1	1	1	1	1	1	1	1	1	1	1	1	1	1	1	1	1	1	1	1	1	1	1	1	1	1	1	1	1
hslO		33 kDa chaperonin	172	172	1	12	21				881	881	881		1	1	1	1	1	1	1	1	1	1	1	1	1	1	1	1	1	1	1	1	1	1	1	1	1	1	1	1	1	1	1	1	1	1	1
lytM		Glycyl-glycine endopeptidase LytM	172	172	1	11	4594				950	950	950		1	1	1	1	1	1	1	1	1	1	1	1	1	1	1	1	1	1	1	1	1	1	1	1	1	1	1	1	1	1	1	1	1	1	1
walK		Sensor protein kinase WalK	172	172	1	11	4905				1826	1826	1826		1	1	1	1	1	1	1	1	1	1	1	1	1	1	1	1	1	1	1	1	1	1	1	1	1	1	1	1	1	1	1	1	1	1	1
copA		Copper-exporting P-type ATPase	172	172	1	11	5120				2408	2408	2408		1	1	1	1	1	1	1	1	1	1	1	1	1	1	1	1	1	1	1	1	1	1	1	1	1	1	1	1	1	1	1	1	1	1	1
bshA		N-acetyl-alpha-D-glucosaminyl L-malate synthase	172	172	1	11	3294				1142	1142	1142		1	1	1	1	1	1	1	1	1	1	1	1	1	1	1	1	1	1	1	1	1	1	1	1	1	1	1	1	1	1	1	1	1	1	1
guaA		GMP synthase [glutamine-hydrolyzing]	172	172	1	11	4425				1541	1541	1541		1	1	1	1	1	1	1	1	1	1	1	1	1	1	1	1	1	1	1	1	1	1	1	1	1	1	1	1	1	1	1	1	1	1	1
nrdF		Ribonucleoside-diphosphate reductase subunit beta	172	172	1	11	1390				971	971	971		1	1	1	1	1	1	1	1	1	1	1	1	1	1	1	1	1	1	1	1	1	1	1	1	1	1	1	1	1	1	1	1	1	1	1
dps		General stress protein 20U	172	172	1	11	3808				443	443	443		1	1	1	1	1	1	1	1	1	1	1	1	1	1	1	1	1	1	1	1	1	1	1	1	1	1	1	1	1	1	1	1	1	1	1
metP_1		Methionine import system permease protein MetP	172	172	1	11	4335				659	659	659		1	1	1	1	1	1	1	1	1	1	1	1	1	1	1	1	1	1	1	1	1	1	1	1	1	1	1	1	1	1	1	1	1	1	1
treR_1		HTH-type transcriptional regulator TreR	172	172	1	11	4322				728	728	728		1	1	1	1	1	1	1	1	1	1	1	1	1	1	1	1	1	1	1	1	1	1	1	1	1	1	1	1	1	1	1	1	1	1	1
def		Peptide deformylase	172	172	1	11	3998				551	551	551		1	1	1	1	1	1	1	1	1	1	1	1	1	1	1	1	1	1	1	1	1	1	1	1	1	1	1	1	1	1	1	1	1	1	1
guaC		GMP reductase	172	172	1	11	3428				977	977	977		1	1	1	1	1	1	1	1	1	1	1	1	1	1	1	1	1	1	1	1	1	1	1	1	1	1	1	1	1	1	1	1	1	1	1
odh		Opine dehydrogenase	172	172	1	11	5884				1082	1082	1082		1	1	1	1	1	1	1	1	1	1	1	1	1	1	1	1	1	1	1	1	1	1	1	1	1	1	1	1	1	1	1	1	1	1	1
group_5155		hypothetical protein	172	172	1	11	5150				1043	1043	1043		1	1	1	1	1	1	1	1	1	1	1	1	1	1	1	1	1	1	1	1	1	1	1	1	1	1	1	1	1	1	1	1	1	1	1
rot		HTH-type transcriptional regulator rot	172	172	1	11	2833				401	401	401		1	1	1	1	1	1	1	1	1	1	1	1	1	1	1	1	1	1	1	1	1	1	1	1	1	1	1	1	1	1	1	1	1	1	1
efp		Elongation factor P	172	172	1	11	3172				557	557	557		1	1	1	1	1	1	1	1	1	1	1	1	1	1	1	1	1	1	1	1	1	1	1	1	1	1	1	1	1	1	1	1	1	1	1
group_516		hypothetical protein	172	172	1	11	3425				236	236	236		1	1	1	1	1	1	1	1	1	1	1	1	1	1	1	1	1	1	1	1	1	1	1	1	1	1	1	1	1	1	1	1	1	1	1
ktrB_1		Ktr system potassium uptake protein B	172	172	1	11	4067				1358	1358	1358		1	1	1	1	1	1	1	1	1	1	1	1	1	1	1	1	1	1	1	1	1	1	1	1	1	1	1	1	1	1	1	1	1	1	1
bmrA		Multidrug resistance ABC transporter ATP-binding/permease protein BmrA	172	172	1	11	1259				1727	1727	1727		1	1	1	1	1	1	1	1	1	1	1	1	1	1	1	1	1	1	1	1	1	1	1	1	1	1	1	1	1	1	1	1	1	1	1
hemH		Ferrochelatase	172	172	1	11	2711				923	923	923		1	1	1	1	1	1	1	1	1	1	1	1	1	1	1	1	1	1	1	1	1	1	1	1	1	1	1	1	1	1	1	1	1	1	1
group_5165		hypothetical protein	172	172	1	11	4178				1040	1040	1040		1	1	1	1	1	1	1	1	1	1	1	1	1	1	1	1	1	1	1	1	1	1	1	1	1	1	1	1	1	1	1	1	1	1	1
ydaP		Putative thiamine pyrophosphate-containing protein YdaP	172	172	1	11	5143				1739	1739	1739		1	1	1	1	1	1	1	1	1	1	1	1	1	1	1	1	1	1	1	1	1	1	1	1	1	1	1	1	1	1	1	1	1	1	1
cggR		Central glycolytic genes regulator	172	172	1	11	1430				1013	1013	1013		1	1	1	1	1	1	1	1	1	1	1	1	1	1	1	1	1	1	1	1	1	1	1	1	1	1	1	1	1	1	1	1	1	1	1
yhdG		putative amino acid permease YhdG	172	172	1	11	5069				1448	1448	1448		1	1	1	1	1	1	1	1	1	1	1	1	1	1	1	1	1	1	1	1	1	1	1	1	1	1	1	1	1	1	1	1	1	1	1
pyrB		Aspartate carbamoyltransferase	172	172	1	11	3745				881	881	881		1	1	1	1	1	1	1	1	1	1	1	1	1	1	1	1	1	1	1	1	1	1	1	1	1	1	1	1	1	1	1	1	1	1	1
femB		Aminoacyltransferase FemB	172	172	1	11	3387				1259	1259	1259		1	1	1	1	1	1	1	1	1	1	1	1	1	1	1	1	1	1	1	1	1	1	1	1	1	1	1	1	1	1	1	1	1	1	1
gltS		Sodium/glutamate symporter	172	172	1	11	5836				1208	1208	1208		1	1	1	1	1	1	1	1	1	1	1	1	1	1	1	1	1	1	1	1	1	1	1	1	1	1	1	1	1	1	1	1	1	1	1
pdhC_2		Dihydrolipoyllysine-residue acetyltransferase component of pyruvate dehydrogenase complex	172	172	1	11	3994				1292	1292	1292		1	1	1	1	1	1	1	1	1	1	1	1	1	1	1	1	1	1	1	1	1	1	1	1	1	1	1	1	1	1	1	1	1	1	1
spxA		Regulatory protein Spx	172	172	1	11	4095				395	395	395		1	1	1	1	1	1	1	1	1	1	1	1	1	1	1	1	1	1	1	1	1	1	1	1	1	1	1	1	1	1	1	1	1	1	1
msrR		Regulatory protein MsrR	172	172	1	11	3402				983	983	983		1	1	1	1	1	1	1	1	1	1	1	1	1	1	1	1	1	1	1	1	1	1	1	1	1	1	1	1	1	1	1	1	1	1	1
trpF		N-(5'-phosphoribosyl)anthranilate isomerase	172	172	1	11	3391				470	635	633		1	1	1	1	1	1	1	1	1	1	1	1	1	1	1	1	1	1	1	1	1	1	1	1	1	1	1	1	1	1	1	1	1	1	1
group_5180		hypothetical protein	172	172	1	11	3503				215	215	215		1	1	1	1	1	1	1	1	1	1	1	1	1	1	1	1	1	1	1	1	1	1	1	1	1	1	1	1	1	1	1	1	1	1	1
fabI		Enoyl-[acyl-carrier-protein] reductase [NADPH] FabI	172	172	1	11	4081				770	770	770		1	1	1	1	1	1	1	1	1	1	1	1	1	1	1	1	1	1	1	1	1	1	1	1	1	1	1	1	1	1	1	1	1	1	1
group_5183		Putative transport protein	172	172	1	11	4080				1085	1085	1085		1	1	1	1	1	1	1	1	1	1	1	1	1	1	1	1	1	1	1	1	1	1	1	1	1	1	1	1	1	1	1	1	1	1	1
sufU		Zinc-dependent sulfurtransferase SufU	172	172	1	11	4187				464	464	464		1	1	1	1	1	1	1	1	1	1	1	1	1	1	1	1	1	1	1	1	1	1	1	1	1	1	1	1	1	1	1	1	1	1	1
yfcJ		putative MFS-type transporter YfcJ	172	172	1	11	146				1211	1211	1211		1	1	1	1	1	1	1	1	1	1	1	1	1	1	1	1	1	1	1	1	1	1	1	1	1	1	1	1	1	1	1	1	1	1	1
guaB		Inosine-5'-monophosphate dehydrogenase	172	172	1	11	4426				1466	1466	1466		1	1	1	1	1	1	1	1	1	1	1	1	1	1	1	1	1	1	1	1	1	1	1	1	1	1	1	1	1	1	1	1	1	1	1
nrdD		Anaerobic ribonucleoside-triphosphate reductase	172	172	1	11	5053				1850	1850	1850		1	1	1	1	1	1	1	1	1	1	1	1	1	1	1	1	1	1	1	1	1	1	1	1	1	1	1	1	1	1	1	1	1	1	1
murT		Lipid II isoglutaminyl synthase (glutamine-hydrolyzing) subunit MurT	172	172	1	11	1974				1313	1313	1313		1	1	1	1	1	1	1	1	1	1	1	1	1	1	1	1	1	1	1	1	1	1	1	1	1	1	1	1	1	1	1	1	1	1	1
ychF		Ribosome-binding ATPase YchF	172	172	1	11	4456				1097	1097	1097		1	1	1	1	1	1	1	1	1	1	1	1	1	1	1	1	1	1	1	1	1	1	1	1	1	1	1	1	1	1	1	1	1	1	1
ldh2		L-lactate dehydrogenase 2	172	172	1	11	5070				959	959	959		1	1	1	1	1	1	1	1	1	1	1	1	1	1	1	1	1	1	1	1	1	1	1	1	1	1	1	1	1	1	1	1	1	1	1
yutF		Acid sugar phosphatase	172	172	1	11	4169				779	779	779		1	1	1	1	1	1	1	1	1	1	1	1	1	1	1	1	1	1	1	1	1	1	1	1	1	1	1	1	1	1	1	1	1	1	1
alsT		Amino-acid carrier protein AlsT	172	172	1	11	3408				1460	1460	1460		1	1	1	1	1	1	1	1	1	1	1	1	1	1	1	1	1	1	1	1	1	1	1	1	1	1	1	1	1	1	1	1	1	1	1
parC		DNA topoisomerase 4 subunit A	172	172	1	11	3410				2402	2402	2402		1	1	1	1	1	1	1	1	1	1	1	1	1	1	1	1	1	1	1	1	1	1	1	1	1	1	1	1	1	1	1	1	1	1	1
trpS		Tryptophan--tRNA ligase	172	172	1	11	4096				989	989	989		1	1	1	1	1	1	1	1	1	1	1	1	1	1	1	1	1	1	1	1	1	1	1	1	1	1	1	1	1	1	1	1	1	1	1
wbpI		UDP-2,3-diacetamido-2,3-dideoxy-D-glucuronate 2-epimerase	172	172	1	11	4748				1124	1124	1124		1	1	1	1	1	1	1	1	1	1	1	1	1	1	1	1	1	1	1	1	1	1	1	1	1	1	1	1	1	1	1	1	1	1	1
ligA		DNA ligase	172	172	1	11	1986				2003	2003	2003		1	1	1	1	1	1	1	1	1	1	1	1	1	1	1	1	1	1	1	1	1	1	1	1	1	1	1	1	1	1	1	1	1	1	1
ymdB		2',3'-cyclic-nucleotide 2'-phosphodiesterase	172	172	1	11	3502				797	797	797		1	1	1	1	1	1	1	1	1	1	1	1	1	1	1	1	1	1	1	1	1	1	1	1	1	1	1	1	1	1	1	1	1	1	1
ypjD		putative protein YpjD	172	172	1	11	3293				317	317	317		1	1	1	1	1	1	1	1	1	1	1	1	1	1	1	1	1	1	1	1	1	1	1	1	1	1	1	1	1	1	1	1	1	1	1
msrA1		Peptide methionine sulfoxide reductase MsrA 1	172	172	1	11	3403				509	509	509		1	1	1	1	1	1	1	1	1	1	1	1	1	1	1	1	1	1	1	1	1	1	1	1	1	1	1	1	1	1	1	1	1	1	1
prkC		Serine/threonine-protein kinase PrkC	172	172	1	11	3723				1994	1994	1994		1	1	1	1	1	1	1	1	1	1	1	1	1	1	1	1	1	1	1	1	1	1	1	1	1	1	1	1	1	1	1	1	1	1	1
mntB_1		Manganese transport system ATP-binding protein MntB	172	172	1	11	1249				743	746	743		1	1	1	1	1	1	1	1	1	1	1	1	1	1	1	1	1	1	1	1	1	1	1	1	1	1	1	1	1	1	1	1	1	1	1
ctaB2		Protoheme IX farnesyltransferase 2	172	172	1	11	3973				911	911	911		1	1	1	1	1	1	1	1	1	1	1	1	1	1	1	1	1	1	1	1	1	1	1	1	1	1	1	1	1	1	1	1	1	1	1
ugtP		Processive diacylglycerol beta-glucosyltransferase	172	172	1	11	4073				1175	1175	1175		1	1	1	1	1	1	1	1	1	1	1	1	1	1	1	1	1	1	1	1	1	1	1	1	1	1	1	1	1	1	1	1	1	1	1
nreC		Oxygen regulatory protein NreC	172	172	1	11	5732				653	653	653		1	1	1	1	1	1	1	1	1	1	1	1	1	1	1	1	1	1	1	1	1	1	1	1	1	1	1	1	1	1	1	1	1	1	1
hemB		Delta-aminolevulinic acid dehydratase	172	172	1	11	3044				974	974	974		1	1	1	1	1	1	1	1	1	1	1	1	1	1	1	1	1	1	1	1	1	1	1	1	1	1	1	1	1	1	1	1	1	1	1
purB		Adenylosuccinate lyase	172	172	1	11	1990				1295	1295	1295		1	1	1	1	1	1	1	1	1	1	1	1	1	1	1	1	1	1	1	1	1	1	1	1	1	1	1	1	1	1	1	1	1	1	1
group_5221		putative protein	172	172	1	11	3718				374	374	374		1	1	1	1	1	1	1	1	1	1	1	1	1	1	1	1	1	1	1	1	1	1	1	1	1	1	1	1	1	1	1	1	1	1	1
yifK		putative transport protein YifK	172	172	1	11	5868				1379	1379	1379		1	1	1	1	1	1	1	1	1	1	1	1	1	1	1	1	1	1	1	1	1	1	1	1	1	1	1	1	1	1	1	1	1	1	1
acsA_1		Acetyl-coenzyme A synthetase	172	172	1	11	2869				1706	1706	1706		1	1	1	1	1	1	1	1	1	1	1	1	1	1	1	1	1	1	1	1	1	1	1	1	1	1	1	1	1	1	1	1	1	1	1
group_5225		hypothetical protein	172	172	1	11	1406				641	641	641		1	1	1	1	1	1	1	1	1	1	1	1	1	1	1	1	1	1	1	1	1	1	1	1	1	1	1	1	1	1	1	1	1	1	1
pyk		Pyruvate kinase	172	172	1	11	3016				1757	1757	1757		1	1	1	1	1	1	1	1	1	1	1	1	1	1	1	1	1	1	1	1	1	1	1	1	1	1	1	1	1	1	1	1	1	1	1
group_5228		hypothetical protein	172	172	1	11	5180				677	680	677		1	1	1	1	1	1	1	1	1	1	1	1	1	1	1	1	1	1	1	1	1	1	1	1	1	1	1	1	1	1	1	1	1	1	1
yfiZ_1		putative siderophore transport system permease protein YfiZ	172	172	1	11	4803				995	995	995		1	1	1	1	1	1	1	1	1	1	1	1	1	1	1	1	1	1	1	1	1	1	1	1	1	1	1	1	1	1	1	1	1	1	1
group_5232		hypothetical protein	172	172	1	11	3091				1268	1268	1268		1	1	1	1	1	1	1	1	1	1	1	1	1	1	1	1	1	1	1	1	1	1	1	1	1	1	1	1	1	1	1	1	1	1	1
gcvT		Aminomethyltransferase	172	172	1	11	3164				1091	1091	1091		1	1	1	1	1	1	1	1	1	1	1	1	1	1	1	1	1	1	1	1	1	1	1	1	1	1	1	1	1	1	1	1	1	1	1
group_5236		hypothetical protein	172	172	1	11	3812				350	350	350		1	1	1	1	1	1	1	1	1	1	1	1	1	1	1	1	1	1	1	1	1	1	1	1	1	1	1	1	1	1	1	1	1	1	1
luxS		S-ribosylhomocysteine lyase	172	172	1	11	3813				470	470	470		1	1	1	1	1	1	1	1	1	1	1	1	1	1	1	1	1	1	1	1	1	1	1	1	1	1	1	1	1	1	1	1	1	1	1
rplQ		50S ribosomal protein L17	172	172	1	11	101				368	368	368		1	1	1	1	1	1	1	1	1	1	1	1	1	1	1	1	1	1	1	1	1	1	1	1	1	1	1	1	1	1	1	1	1	1	1
plc		1-phosphatidylinositol phosphodiesterase	172	172	1	11	4824				986	986	986		1	1	1	1	1	1	1	1	1	1	1	1	1	1	1	1	1	1	1	1	1	1	1	1	1	1	1	1	1	1	1	1	1	1	1
hprK		HPr kinase/phosphorylase	172	172	1	11	1418				932	932	932		1	1	1	1	1	1	1	1	1	1	1	1	1	1	1	1	1	1	1	1	1	1	1	1	1	1	1	1	1	1	1	1	1	1	1
cspA_1		Cold shock protein CspA	172	172	1	11	3361				200	200	200		1	1	1	1	1	1	1	1	1	1	1	1	1	1	1	1	1	1	1	1	1	1	1	1	1	1	1	1	1	1	1	1	1	1	1
prfA		Peptide chain release factor 1	172	172	1	11	3829				1076	1076	1076		1	1	1	1	1	1	1	1	1	1	1	1	1	1	1	1	1	1	1	1	1	1	1	1	1	1	1	1	1	1	1	1	1	1	1
tarJ		Ribulose-5-phosphate reductase 1	172	172	1	11	4618				1025	1025	1025		1	1	1	1	1	1	1	1	1	1	1	1	1	1	1	1	1	1	1	1	1	1	1	1	1	1	1	1	1	1	1	1	1	1	1
garL		5-keto-4-deoxy-D-glucarate aldolase	172	172	1	11	4794				776	779	778		1	1	1	1	1	1	1	1	1	1	1	1	1	1	1	1	1	1	1	1	1	1	1	1	1	1	1	1	1	1	1	1	1	1	1
era		GTPase Era	172	172	1	11	3135				899	899	899		1	1	1	1	1	1	1	1	1	1	1	1	1	1	1	1	1	1	1	1	1	1	1	1	1	1	1	1	1	1	1	1	1	1	1
sbnB		N-((2S)-2-amino-2-carboxyethyl)-L-glutamate dehydrogenase	172	172	1	11	4800				1010	1010	1010		1	1	1	1	1	1	1	1	1	1	1	1	1	1	1	1	1	1	1	1	1	1	1	1	1	1	1	1	1	1	1	1	1	1	1
zur		Zinc-specific metallo-regulatory protein	172	172	1	11	3148				410	410	410		1	1	1	1	1	1	1	1	1	1	1	1	1	1	1	1	1	1	1	1	1	1	1	1	1	1	1	1	1	1	1	1	1	1	1
group_5253		hypothetical protein	172	172	1	11	3816				671	671	671		1	1	1	1	1	1	1	1	1	1	1	1	1	1	1	1	1	1	1	1	1	1	1	1	1	1	1	1	1	1	1	1	1	1	1
rpsJ		30S ribosomal protein S10	172	172	1	11	131				308	308	308		1	1	1	1	1	1	1	1	1	1	1	1	1	1	1	1	1	1	1	1	1	1	1	1	1	1	1	1	1	1	1	1	1	1	1
glpT		Glycerol-3-phosphate transporter	172	172	1	11	4485				1358	1358	1358		1	1	1	1	1	1	1	1	1	1	1	1	1	1	1	1	1	1	1	1	1	1	1	1	1	1	1	1	1	1	1	1	1	1	1
atpD		ATP synthase subunit beta	172	172	1	11	3845				1412	1412	1412		1	1	1	1	1	1	1	1	1	1	1	1	1	1	1	1	1	1	1	1	1	1	1	1	1	1	1	1	1	1	1	1	1	1	1
group_5258		hypothetical protein	172	172	1	11	5796				2105	2105	2105		1	1	1	1	1	1	1	1	1	1	1	1	1	1	1	1	1	1	1	1	1	1	1	1	1	1	1	1	1	1	1	1	1	1	1
rpsA		30S ribosomal protein S1	172	172	1	11	3276				1175	1175	1175		1	1	1	1	1	1	1	1	1	1	1	1	1	1	1	1	1	1	1	1	1	1	1	1	1	1	1	1	1	1	1	1	1	1	1
trxB		Thioredoxin reductase	172	172	1	11	1422				935	935	935		1	1	1	1	1	1	1	1	1	1	1	1	1	1	1	1	1	1	1	1	1	1	1	1	1	1	1	1	1	1	1	1	1	1	1
group_5263		hypothetical protein	172	172	1	11	1421				1439	1439	1439		1	1	1	1	1	1	1	1	1	1	1	1	1	1	1	1	1	1	1	1	1	1	1	1	1	1	1	1	1	1	1	1	1	1	1
rpsM		30S ribosomal protein S13	172	172	1	11	104				365	365	365		1	1	1	1	1	1	1	1	1	1	1	1	1	1	1	1	1	1	1	1	1	1	1	1	1	1	1	1	1	1	1	1	1	1	1
group_5266		hypothetical protein	172	172	1	11	1270				1067	1067	1067		1	1	1	1	1	1	1	1	1	1	1	1	1	1	1	1	1	1	1	1	1	1	1	1	1	1	1	1	1	1	1	1	1	1	1
sarX		HTH-type transcriptional regulator SarX	172	172	1	11	1289				425	425	425		1	1	1	1	1	1	1	1	1	1	1	1	1	1	1	1	1	1	1	1	1	1	1	1	1	1	1	1	1	1	1	1	1	1	1
murG		UDP-N-acetylglucosamine--N-acetylmuramyl-(pentapeptide) pyrophosphoryl-undecaprenol N-acetylglucosamine transferase	172	172	1	11	3341				1070	1070	1070		1	1	1	1	1	1	1	1	1	1	1	1	1	1	1	1	1	1	1	1	1	1	1	1	1	1	1	1	1	1	1	1	1	1	1
fumC		Fumarate hydratase class II	172	172	1	11	2691				1385	1385	1385		1	1	1	1	1	1	1	1	1	1	1	1	1	1	1	1	1	1	1	1	1	1	1	1	1	1	1	1	1	1	1	1	1	1	1
rarD		Protein RarD	172	172	1	11	4946				908	908	908		1	1	1	1	1	1	1	1	1	1	1	1	1	1	1	1	1	1	1	1	1	1	1	1	1	1	1	1	1	1	1	1	1	1	1
group_5281		hypothetical protein	172	172	1	11	3807				413	413	413		1	1	1	1	1	1	1	1	1	1	1	1	1	1	1	1	1	1	1	1	1	1	1	1	1	1	1	1	1	1	1	1	1	1	1
farB_1		Fatty acid resistance protein FarB	172	172	1	11	5693				1439	1439	1439		1	1	1	1	1	1	1	1	1	1	1	1	1	1	1	1	1	1	1	1	1	1	1	1	1	1	1	1	1	1	1	1	1	1	1
group_5285		hypothetical protein	172	172	1	11	5818				1055	1055	1055		1	1	1	1	1	1	1	1	1	1	1	1	1	1	1	1	1	1	1	1	1	1	1	1	1	1	1	1	1	1	1	1	1	1	1
group_5287		hypothetical protein	172	172	1	11	4650				1763	1763	1763		1	1	1	1	1	1	1	1	1	1	1	1	1	1	1	1	1	1	1	1	1	1	1	1	1	1	1	1	1	1	1	1	1	1	1
group_5288		Putative aldehyde dehydrogenase	172	172	1	11	3825				1427	1427	1427		1	1	1	1	1	1	1	1	1	1	1	1	1	1	1	1	1	1	1	1	1	1	1	1	1	1	1	1	1	1	1	1	1	1	1
frdB		Fumarate reductase iron-sulfur subunit	172	172	1	11	3935				815	815	815		1	1	1	1	1	1	1	1	1	1	1	1	1	1	1	1	1	1	1	1	1	1	1	1	1	1	1	1	1	1	1	1	1	1	1
menD		2-succinyl-5-enolpyruvyl-6-hydroxy-3-cyclohexene-1-carboxylate synthase	172	172	1	11	4049				1673	1673	1673		1	1	1	1	1	1	1	1	1	1	1	1	1	1	1	1	1	1	1	1	1	1	1	1	1	1	1	1	1	1	1	1	1	1	1
hchA		Protein/nucleic acid deglycase HchA	172	172	1	11	1024				878	878	878		1	1	1	1	1	1	1	1	1	1	1	1	1	1	1	1	1	1	1	1	1	1	1	1	1	1	1	1	1	1	1	1	1	1	1
isdF		putative heme-iron transport system permease protein IsdF	172	172	1	11	3950				968	968	968		1	1	1	1	1	1	1	1	1	1	1	1	1	1	1	1	1	1	1	1	1	1	1	1	1	1	1	1	1	1	1	1	1	1	1
lpd3		Dihydrolipoyl dehydrogenase	172	172	1	11	3183				1421	1421	1421		1	1	1	1	1	1	1	1	1	1	1	1	1	1	1	1	1	1	1	1	1	1	1	1	1	1	1	1	1	1	1	1	1	1	1
mvaS		Hydroxymethylglutaryl-CoA synthase	172	172	1	11	5135				1166	1166	1166		1	1	1	1	1	1	1	1	1	1	1	1	1	1	1	1	1	1	1	1	1	1	1	1	1	1	1	1	1	1	1	1	1	1	1
cntF		Metal-staphylopine import system ATP-binding protein CntF	172	172	1	11	5637				749	749	749		1	1	1	1	1	1	1	1	1	1	1	1	1	1	1	1	1	1	1	1	1	1	1	1	1	1	1	1	1	1	1	1	1	1	1
group_5299		hypothetical protein	172	172	1	11	5104				587	587	587		1	1	1	1	1	1	1	1	1	1	1	1	1	1	1	1	1	1	1	1	1	1	1	1	1	1	1	1	1	1	1	1	1	1	1
pyrF		Orotidine 5'-phosphate decarboxylase	172	172	1	11	3741				692	692	692		1	1	1	1	1	1	1	1	1	1	1	1	1	1	1	1	1	1	1	1	1	1	1	1	1	1	1	1	1	1	1	1	1	1	1
group_5303		hypothetical protein	172	172	1	11	5720				452	452	452		1	1	1	1	1	1	1	1	1	1	1	1	1	1	1	1	1	1	1	1	1	1	1	1	1	1	1	1	1	1	1	1	1	1	1
ywiB		putative beta-barrel protein YwiB	172	172	1	11	1198				416	416	416		1	1	1	1	1	1	1	1	1	1	1	1	1	1	1	1	1	1	1	1	1	1	1	1	1	1	1	1	1	1	1	1	1	1	1
nreB		Oxygen sensor histidine kinase NreB	172	172	1	11	5721				1034	1034	1034		1	1	1	1	1	1	1	1	1	1	1	1	1	1	1	1	1	1	1	1	1	1	1	1	1	1	1	1	1	1	1	1	1	1	1
group_5311		hypothetical protein	172	172	1	11	5038				455	455	455		1	1	1	1	1	1	1	1	1	1	1	1	1	1	1	1	1	1	1	1	1	1	1	1	1	1	1	1	1	1	1	1	1	1	1
fabH		3-oxoacyl-[acyl-carrier-protein] synthase 3	172	172	1	11	4112				941	941	941		1	1	1	1	1	1	1	1	1	1	1	1	1	1	1	1	1	1	1	1	1	1	1	1	1	1	1	1	1	1	1	1	1	1	1
cmk		Cytidylate kinase	172	172	1	11	3275				659	659	659		1	1	1	1	1	1	1	1	1	1	1	1	1	1	1	1	1	1	1	1	1	1	1	1	1	1	1	1	1	1	1	1	1	1	1
potB		Spermidine/putrescine transport system permease protein PotB	172	172	1	11	3989				797	797	797		1	1	1	1	1	1	1	1	1	1	1	1	1	1	1	1	1	1	1	1	1	1	1	1	1	1	1	1	1	1	1	1	1	1	1
lysC		Aspartokinase	172	172	1	11	3370				1205	1205	1205		1	1	1	1	1	1	1	1	1	1	1	1	1	1	1	1	1	1	1	1	1	1	1	1	1	1	1	1	1	1	1	1	1	1	1
group_5320		hypothetical protein	172	172	1	11	4515				1361	1361	1361		1	1	1	1	1	1	1	1	1	1	1	1	1	1	1	1	1	1	1	1	1	1	1	1	1	1	1	1	1	1	1	1	1	1	1
crr		PTS system glucose-specific EIIA component	172	172	1	11	3337				500	500	500		1	1	1	1	1	1	1	1	1	1	1	1	1	1	1	1	1	1	1	1	1	1	1	1	1	1	1	1	1	1	1	1	1	1	1
scpA		Segregation and condensation protein A	172	172	1	11	3208				755	755	755		1	1	1	1	1	1	1	1	1	1	1	1	1	1	1	1	1	1	1	1	1	1	1	1	1	1	1	1	1	1	1	1	1	1	1
metK		S-adenosylmethionine synthase	172	172	1	11	2805				1193	1196	1195		1	1	1	1	1	1	1	1	1	1	1	1	1	1	1	1	1	1	1	1	1	1	1	1	1	1	1	1	1	1	1	1	1	1	1
fadN		putative 3-hydroxyacyl-CoA dehydrogenase	172	172	1	11	4643				2261	2261	2261		1	1	1	1	1	1	1	1	1	1	1	1	1	1	1	1	1	1	1	1	1	1	1	1	1	1	1	1	1	1	1	1	1	1	1
fadA		3-ketoacyl-CoA thiolase	172	172	1	11	4645				1184	1184	1184		1	1	1	1	1	1	1	1	1	1	1	1	1	1	1	1	1	1	1	1	1	1	1	1	1	1	1	1	1	1	1	1	1	1	1
brnQ_3		Branched-chain amino acid transport system 2 carrier protein	172	172	1	11	3356				1343	1343	1343		1	1	1	1	1	1	1	1	1	1	1	1	1	1	1	1	1	1	1	1	1	1	1	1	1	1	1	1	1	1	1	1	1	1	1
group_533		hypothetical protein	172	172	1	11	4782				812	1430	1426		1	1	1	1	1	1	1	1	1	1	1	1	1	1	1	1	1	1	1	1	1	1	1	1	1	1	1	1	1	1	1	1	1	1	1
ydjZ		TVP38/TMEM64 family inner membrane protein YdjZ	172	172	1	11	4133				575	575	575		1	1	1	1	1	1	1	1	1	1	1	1	1	1	1	1	1	1	1	1	1	1	1	1	1	1	1	1	1	1	1	1	1	1	1
ackA		Acetate kinase	172	172	1	11	3000				1202	1202	1202		1	1	1	1	1	1	1	1	1	1	1	1	1	1	1	1	1	1	1	1	1	1	1	1	1	1	1	1	1	1	1	1	1	1	1
glmU		Bifunctional protein GlmU	172	172	1	12	35				1352	1352	1352		1	1	1	1	1	1	1	1	1	1	1	1	1	1	1	1	1	1	1	1	1	1	1	1	1	1	1	1	1	1	1	1	1	1	1
birA		Bifunctional ligase/repressor BirA	172	172	1	11	3296				971	971	971		1	1	1	1	1	1	1	1	1	1	1	1	1	1	1	1	1	1	1	1	1	1	1	1	1	1	1	1	1	1	1	1	1	1	1
group_5337		hypothetical protein	172	172	1	11	5102				230	230	230		1	1	1	1	1	1	1	1	1	1	1	1	1	1	1	1	1	1	1	1	1	1	1	1	1	1	1	1	1	1	1	1	1	1	1
group_5338		hypothetical protein	172	172	1	11	4479				995	995	995		1	1	1	1	1	1	1	1	1	1	1	1	1	1	1	1	1	1	1	1	1	1	1	1	1	1	1	1	1	1	1	1	1	1	1
rihA		Pyrimidine-specific ribonucleoside hydrolase RihA	172	172	1	11	4632				935	935	935		1	1	1	1	1	1	1	1	1	1	1	1	1	1	1	1	1	1	1	1	1	1	1	1	1	1	1	1	1	1	1	1	1	1	1
cdr		Coenzyme A disulfide reductase	172	172	1	11	4126				1316	1316	1316		1	1	1	1	1	1	1	1	1	1	1	1	1	1	1	1	1	1	1	1	1	1	1	1	1	1	1	1	1	1	1	1	1	1	1
group_5341		hypothetical protein	172	172	1	11	3847				233	233	233		1	1	1	1	1	1	1	1	1	1	1	1	1	1	1	1	1	1	1	1	1	1	1	1	1	1	1	1	1	1	1	1	1	1	1
lctP_1		L-lactate permease	172	172	1	11	4807				1592	1592	1592		1	1	1	1	1	1	1	1	1	1	1	1	1	1	1	1	1	1	1	1	1	1	1	1	1	1	1	1	1	1	1	1	1	1	1
group_5344		hypothetical protein	172	172	1	11	5149				203	203	203		1	1	1	1	1	1	1	1	1	1	1	1	1	1	1	1	1	1	1	1	1	1	1	1	1	1	1	1	1	1	1	1	1	1	1
rqcH		Rqc2 RqcH	172	172	1	11	3737				1697	1697	1697		1	1	1	1	1	1	1	1	1	1	1	1	1	1	1	1	1	1	1	1	1	1	1	1	1	1	1	1	1	1	1	1	1	1	1
nos		Nitric oxide synthase oxygenase	172	172	1	11	1998				1076	1076	1076		1	1	1	1	1	1	1	1	1	1	1	1	1	1	1	1	1	1	1	1	1	1	1	1	1	1	1	1	1	1	1	1	1	1	1
group_535		hypothetical protein	172	172	1	11	4768				1226	1544	1532		1	1	1	1	1	1	1	1	1	1	1	1	1	1	1	1	1	1	1	1	1	1	1	1	1	1	1	1	1	1	1	1	1	1	1
atpH		ATP synthase subunit delta	172	172	1	11	3842				539	539	539		1	1	1	1	1	1	1	1	1	1	1	1	1	1	1	1	1	1	1	1	1	1	1	1	1	1	1	1	1	1	1	1	1	1	1
abgB		p-aminobenzoyl-glutamate hydrolase subunit B	172	172	1	11	3814				1184	1184	1184		1	1	1	1	1	1	1	1	1	1	1	1	1	1	1	1	1	1	1	1	1	1	1	1	1	1	1	1	1	1	1	1	1	1	1
tarA		N-acetylglucosaminyldiphosphoundecaprenol N-acetyl-beta-D-mannosaminyltransferase	172	172	1	11	1252				764	764	764		1	1	1	1	1	1	1	1	1	1	1	1	1	1	1	1	1	1	1	1	1	1	1	1	1	1	1	1	1	1	1	1	1	1	1
feoB		Fe(2+) transporter FeoB	172	172	1	11	5129				1994	1994	1994		1	1	1	1	1	1	1	1	1	1	1	1	1	1	1	1	1	1	1	1	1	1	1	1	1	1	1	1	1	1	1	1	1	1	1
engB		putative GTP-binding protein EngB	172	172	1	11	3039				590	590	590		1	1	1	1	1	1	1	1	1	1	1	1	1	1	1	1	1	1	1	1	1	1	1	1	1	1	1	1	1	1	1	1	1	1	1
catE_1		Catechol-2,3-dioxygenase	172	172	1	11	5162				806	806	806		1	1	1	1	1	1	1	1	1	1	1	1	1	1	1	1	1	1	1	1	1	1	1	1	1	1	1	1	1	1	1	1	1	1	1
group_5358		hypothetical protein	172	172	1	11	4217				203	203	203		1	1	1	1	1	1	1	1	1	1	1	1	1	1	1	1	1	1	1	1	1	1	1	1	1	1	1	1	1	1	1	1	1	1	1
rutD		putative protein	172	172	1	11	1204				800	800	800		1	1	1	1	1	1	1	1	1	1	1	1	1	1	1	1	1	1	1	1	1	1	1	1	1	1	1	1	1	1	1	1	1	1	1
alsS		Acetolactate synthase	172	172	1	11	85				1664	1664	1664		1	1	1	1	1	1	1	1	1	1	1	1	1	1	1	1	1	1	1	1	1	1	1	1	1	1	1	1	1	1	1	1	1	1	1
bfmBAB		2-oxoisovalerate dehydrogenase subunit beta	172	172	1	11	3185				983	983	983		1	1	1	1	1	1	1	1	1	1	1	1	1	1	1	1	1	1	1	1	1	1	1	1	1	1	1	1	1	1	1	1	1	1	1
addA		ATP-dependent helicase/nuclease subunit A	172	172	1	11	4129				3653	3653	3653		1	1	1	1	1	1	1	1	1	1	1	1	1	1	1	1	1	1	1	1	1	1	1	1	1	1	1	1	1	1	1	1	1	1	1
yhfS		Putative acetyl-CoA C-acetyltransferase YhfS	172	177	1.03	11	1086				1139	1139	1139		1	1	1	1	1	1	1	1	1	1	1	1	1	1	1	1	1	1	1	1	1	1	1	1	1	1	1	1	1	1	1	1	1	1	1
pepA_2		Cytosol aminopeptidase	172	172	1	11	4155				1475	1475	1475		1	1	1	1	1	1	1	1	1	1	1	1	1	1	1	1	1	1	1	1	1	1	1	1	1	1	1	1	1	1	1	1	1	1	1
ywqE_2		Tyrosine-protein phosphatase YwqE	172	172	1	11	4984				767	767	767		1	1	1	1	1	1	1	1	1	1	1	1	1	1	1	1	1	1	1	1	1	1	1	1	1	1	1	1	1	1	1	1	1	1	1
potD		Spermidine/putrescine-binding periplasmic protein	172	172	1	11	3987				1073	1073	1073		1	1	1	1	1	1	1	1	1	1	1	1	1	1	1	1	1	1	1	1	1	1	1	1	1	1	1	1	1	1	1	1	1	1	1
graR_1		Response regulator protein GraR	172	172	1	11	5042				665	665	665		1	1	1	1	1	1	1	1	1	1	1	1	1	1	1	1	1	1	1	1	1	1	1	1	1	1	1	1	1	1	1	1	1	1	1
leuB		3-isopropylmalate dehydrogenase	172	172	1	11	1454				1046	1046	1046		1	1	1	1	1	1	1	1	1	1	1	1	1	1	1	1	1	1	1	1	1	1	1	1	1	1	1	1	1	1	1	1	1	1	1
group_5377		hypothetical protein	172	172	1	11	4175				827	827	827		1	1	1	1	1	1	1	1	1	1	1	1	1	1	1	1	1	1	1	1	1	1	1	1	1	1	1	1	1	1	1	1	1	1	1
pncB2		Nicotinate phosphoribosyltransferase pncB2	172	172	1	11	1997				1469	1469	1469		1	1	1	1	1	1	1	1	1	1	1	1	1	1	1	1	1	1	1	1	1	1	1	1	1	1	1	1	1	1	1	1	1	1	1
group_5379		hypothetical protein	172	172	1	11	5706				467	467	467		1	1	1	1	1	1	1	1	1	1	1	1	1	1	1	1	1	1	1	1	1	1	1	1	1	1	1	1	1	1	1	1	1	1	1
proP		Proline/betaine transporter	172	177	1.03	11	1082				1400	1400	1400		1	1	1	1	1	1	1	1	1	1	1	1	1	1	1	1	1	1	1	1	1	1	1	1	1	1	1	1	1	1	1	1	1	1	1
glcU_1		putative glucose uptake protein GlcU	172	172	1	11	4599				881	881	881		1	1	1	1	1	1	1	1	1	1	1	1	1	1	1	1	1	1	1	1	1	1	1	1	1	1	1	1	1	1	1	1	1	1	1
lcfB		Long-chain-fatty-acid--CoA ligase	172	172	1	11	4641				1505	1505	1505		1	1	1	1	1	1	1	1	1	1	1	1	1	1	1	1	1	1	1	1	1	1	1	1	1	1	1	1	1	1	1	1	1	1	1
dkgA		2,5-diketo-D-gluconic acid reductase A	172	172	1	11	1360				839	839	839		1	1	1	1	1	1	1	1	1	1	1	1	1	1	1	1	1	1	1	1	1	1	1	1	1	1	1	1	1	1	1	1	1	1	1
pchA		Salicylate biosynthesis isochorismate synthase	172	172	1	11	4050				1361	1361	1361		1	1	1	1	1	1	1	1	1	1	1	1	1	1	1	1	1	1	1	1	1	1	1	1	1	1	1	1	1	1	1	1	1	1	1
mntH_1		Divalent metal cation transporter MntH	172	172	1	11	3099				1229	1232	1229		1	1	1	1	1	1	1	1	1	1	1	1	1	1	1	1	1	1	1	1	1	1	1	1	1	1	1	1	1	1	1	1	1	1	1
ltaA		putative glycolipid permease LtaA	172	172	1	11	4074				1190	1190	1190		1	1	1	1	1	1	1	1	1	1	1	1	1	1	1	1	1	1	1	1	1	1	1	1	1	1	1	1	1	1	1	1	1	1	1
group_5395		hypothetical protein	172	172	1	11	5831				419	419	419		1	1	1	1	1	1	1	1	1	1	1	1	1	1	1	1	1	1	1	1	1	1	1	1	1	1	1	1	1	1	1	1	1	1	1
phnE_2		Phosphate-import permease protein PhnE	172	172	1	11	4772				815	815	815		1	1	1	1	1	1	1	1	1	1	1	1	1	1	1	1	1	1	1	1	1	1	1	1	1	1	1	1	1	1	1	1	1	1	1
dltA		D-alanine--D-alanyl carrier protein ligase	172	172	1	11	4165				1457	1457	1457		1	1	1	1	1	1	1	1	1	1	1	1	1	1	1	1	1	1	1	1	1	1	1	1	1	1	1	1	1	1	1	1	1	1	1
group_5400		hypothetical protein	172	172	1	11	3102				269	269	269		1	1	1	1	1	1	1	1	1	1	1	1	1	1	1	1	1	1	1	1	1	1	1	1	1	1	1	1	1	1	1	1	1	1	1
ftnA		Bacterial non-heme ferritin	172	172	1	11	1975				500	500	500		1	1	1	1	1	1	1	1	1	1	1	1	1	1	1	1	1	1	1	1	1	1	1	1	1	1	1	1	1	1	1	1	1	1	1
bglK		Beta-glucoside kinase	172	172	1	11	4518				860	860	860		1	1	1	1	1	1	1	1	1	1	1	1	1	1	1	1	1	1	1	1	1	1	1	1	1	1	1	1	1	1	1	1	1	1	1
group_5406		hypothetical protein	172	172	1	11	5139				218	218	218		1	1	1	1	1	1	1	1	1	1	1	1	1	1	1	1	1	1	1	1	1	1	1	1	1	1	1	1	1	1	1	1	1	1	1
group_5407		hypothetical protein	172	172	1	11	2002				1097	1097	1097		1	1	1	1	1	1	1	1	1	1	1	1	1	1	1	1	1	1	1	1	1	1	1	1	1	1	1	1	1	1	1	1	1	1	1
nrtD		Nitrate import ATP-binding protein NrtD	172	172	1	11	4711				710	740	739		1	1	1	1	1	1	1	1	1	1	1	1	1	1	1	1	1	1	1	1	1	1	1	1	1	1	1	1	1	1	1	1	1	1	1
smc		Chromosome partition protein Smc	172	172	1	11	3709				3566	3566	3566		1	1	1	1	1	1	1	1	1	1	1	1	1	1	1	1	1	1	1	1	1	1	1	1	1	1	1	1	1	1	1	1	1	1	1
group_5411		hypothetical protein	172	172	1	11	4688				1055	1055	1055		1	1	1	1	1	1	1	1	1	1	1	1	1	1	1	1	1	1	1	1	1	1	1	1	1	1	1	1	1	1	1	1	1	1	1
nagB_1		Glucosamine-6-phosphate deaminase	172	177	1.03	11	1073				758	758	758		1	1	1	1	1	1	1	1	1	1	1	1	1	1	1	1	1	1	1	1	1	1	1	1	1	1	1	1	1	1	1	1	1	1	1
group_5418		hypothetical protein	172	172	1	11	3511				1286	1286	1286		1	1	1	1	1	1	1	1	1	1	1	1	1	1	1	1	1	1	1	1	1	1	1	1	1	1	1	1	1	1	1	1	1	1	1
group_542		hypothetical protein	172	172	1	11	4710				971	1031	973		1	1	1	1	1	1	1	1	1	1	1	1	1	1	1	1	1	1	1	1	1	1	1	1	1	1	1	1	1	1	1	1	1	1	1
group_5420		hypothetical protein	172	172	1	11	3342				614	614	614		1	1	1	1	1	1	1	1	1	1	1	1	1	1	1	1	1	1	1	1	1	1	1	1	1	1	1	1	1	1	1	1	1	1	1
qoxD		Quinol oxidase subunit 4	172	172	1	11	4033				290	290	290		1	1	1	1	1	1	1	1	1	1	1	1	1	1	1	1	1	1	1	1	1	1	1	1	1	1	1	1	1	1	1	1	1	1	1
group_5423		hypothetical protein	172	172	1	11	135				887	887	887		1	1	1	1	1	1	1	1	1	1	1	1	1	1	1	1	1	1	1	1	1	1	1	1	1	1	1	1	1	1	1	1	1	1	1
stp		Serine/threonine phosphatase stp	172	172	1	11	3724				743	743	743		1	1	1	1	1	1	1	1	1	1	1	1	1	1	1	1	1	1	1	1	1	1	1	1	1	1	1	1	1	1	1	1	1	1	1
fni		Isopentenyl-diphosphate delta-isomerase	172	172	1	11	5835				1049	1049	1049		1	1	1	1	1	1	1	1	1	1	1	1	1	1	1	1	1	1	1	1	1	1	1	1	1	1	1	1	1	1	1	1	1	1	1
argB		Acetylglutamate kinase	172	172	1	11	4701				764	770	765		1	1	1	1	1	1	1	1	1	1	1	1	1	1	1	1	1	1	1	1	1	1	1	1	1	1	1	1	1	1	1	1	1	1	1
group_5432		hypothetical protein	172	172	1	11	3999				218	218	218		1	1	1	1	1	1	1	1	1	1	1	1	1	1	1	1	1	1	1	1	1	1	1	1	1	1	1	1	1	1	1	1	1	1	1
group_5433		hypothetical protein	172	172	1	11	51				1757	1757	1757		1	1	1	1	1	1	1	1	1	1	1	1	1	1	1	1	1	1	1	1	1	1	1	1	1	1	1	1	1	1	1	1	1	1	1
yjbK		Putative triphosphatase YjbK	172	172	1	11	4088				593	593	593		1	1	1	1	1	1	1	1	1	1	1	1	1	1	1	1	1	1	1	1	1	1	1	1	1	1	1	1	1	1	1	1	1	1	1
aldH1		4,4'-diaponeurosporen-aldehyde dehydrogenase	172	172	1	11	2005				1379	1379	1379		1	1	1	1	1	1	1	1	1	1	1	1	1	1	1	1	1	1	1	1	1	1	1	1	1	1	1	1	1	1	1	1	1	1	1
group_5437		Putative lipid kinase	172	172	1	11	1384				917	917	917		1	1	1	1	1	1	1	1	1	1	1	1	1	1	1	1	1	1	1	1	1	1	1	1	1	1	1	1	1	1	1	1	1	1	1
msrA2		Peptide methionine sulfoxide reductase MsrA 2	172	172	1	11	3335				533	533	533		1	1	1	1	1	1	1	1	1	1	1	1	1	1	1	1	1	1	1	1	1	1	1	1	1	1	1	1	1	1	1	1	1	1	1
group_5442		hypothetical protein	172	172	1	11	4712				512	512	512		1	1	1	1	1	1	1	1	1	1	1	1	1	1	1	1	1	1	1	1	1	1	1	1	1	1	1	1	1	1	1	1	1	1	1
group_5443		Putative pyridoxal phosphate-dependent acyltransferase	172	172	1	11	1023				1187	1187	1187		1	1	1	1	1	1	1	1	1	1	1	1	1	1	1	1	1	1	1	1	1	1	1	1	1	1	1	1	1	1	1	1	1	1	1
moaE		Molybdopterin synthase catalytic subunit	172	172	1	11	151				446	446	446		1	1	1	1	1	1	1	1	1	1	1	1	1	1	1	1	1	1	1	1	1	1	1	1	1	1	1	1	1	1	1	1	1	1	1
rpsP		30S ribosomal protein S16	172	172	1	11	3705				275	275	275		1	1	1	1	1	1	1	1	1	1	1	1	1	1	1	1	1	1	1	1	1	1	1	1	1	1	1	1	1	1	1	1	1	1	1
group_5447		hypothetical protein	172	172	1	11	4210				539	539	539		1	1	1	1	1	1	1	1	1	1	1	1	1	1	1	1	1	1	1	1	1	1	1	1	1	1	1	1	1	1	1	1	1	1	1
group_5448		putative hydrolase	172	172	1	11	5093				830	830	830		1	1	1	1	1	1	1	1	1	1	1	1	1	1	1	1	1	1	1	1	1	1	1	1	1	1	1	1	1	1	1	1	1	1	1
cntK		Histidine racemase	172	172	1	11	5630				821	821	821		1	1	1	1	1	1	1	1	1	1	1	1	1	1	1	1	1	1	1	1	1	1	1	1	1	1	1	1	1	1	1	1	1	1	1
nfuA		Fe/S biogenesis protein NfuA	172	172	1	11	4161				242	242	242		1	1	1	1	1	1	1	1	1	1	1	1	1	1	1	1	1	1	1	1	1	1	1	1	1	1	1	1	1	1	1	1	1	1	1
asd		Aspartate-semialdehyde dehydrogenase	172	172	1	11	3369				989	989	989		1	1	1	1	1	1	1	1	1	1	1	1	1	1	1	1	1	1	1	1	1	1	1	1	1	1	1	1	1	1	1	1	1	1	1
dapX		putative N-acetyl-LL-diaminopimelate aminotransferase	172	172	1	11	4041				1154	1154	1154		1	1	1	1	1	1	1	1	1	1	1	1	1	1	1	1	1	1	1	1	1	1	1	1	1	1	1	1	1	1	1	1	1	1	1
group_5456		hypothetical protein	172	172	1	11	4040				1010	1010	1010		1	1	1	1	1	1	1	1	1	1	1	1	1	1	1	1	1	1	1	1	1	1	1	1	1	1	1	1	1	1	1	1	1	1	1
group_5457		hypothetical protein	172	172	1	11	4708				1034	1034	1034		1	1	1	1	1	1	1	1	1	1	1	1	1	1	1	1	1	1	1	1	1	1	1	1	1	1	1	1	1	1	1	1	1	1	1
group_5458		DegV domain-containing protein	172	172	1	11	1407				866	866	866		1	1	1	1	1	1	1	1	1	1	1	1	1	1	1	1	1	1	1	1	1	1	1	1	1	1	1	1	1	1	1	1	1	1	1
group_5459		hypothetical protein	172	172	1	11	4588				902	902	902		1	1	1	1	1	1	1	1	1	1	1	1	1	1	1	1	1	1	1	1	1	1	1	1	1	1	1	1	1	1	1	1	1	1	1
group_546		hypothetical protein	172	172	1	11	4631				656	2096	1930		1	1	1	1	1	1	1	1	1	1	1	1	1	1	1	1	1	1	1	1	1	1	1	1	1	1	1	1	1	1	1	1	1	1	1
murE		UDP-N-acetylmuramoyl-L-alanyl-D-glutamate--L-lysine ligase	172	172	1	11	4072				1481	1484	1483		1	1	1	1	1	1	1	1	1	1	1	1	1	1	1	1	1	1	1	1	1	1	1	1	1	1	1	1	1	1	1	1	1	1	1
group_5461		hypothetical protein	172	172	1	11	4191				851	851	851		1	1	1	1	1	1	1	1	1	1	1	1	1	1	1	1	1	1	1	1	1	1	1	1	1	1	1	1	1	1	1	1	1	1	1
rluD_2		Ribosomal large subunit pseudouridine synthase D	172	172	1	11	2692				821	821	821		1	1	1	1	1	1	1	1	1	1	1	1	1	1	1	1	1	1	1	1	1	1	1	1	1	1	1	1	1	1	1	1	1	1	1
hepT		Heptaprenyl diphosphate synthase component 2	172	172	1	11	3282				959	959	959		1	1	1	1	1	1	1	1	1	1	1	1	1	1	1	1	1	1	1	1	1	1	1	1	1	1	1	1	1	1	1	1	1	1	1
pheT		Phenylalanine--tRNA ligase beta subunit	172	172	1	11	3945				2402	2402	2402		1	1	1	1	1	1	1	1	1	1	1	1	1	1	1	1	1	1	1	1	1	1	1	1	1	1	1	1	1	1	1	1	1	1	1
group_5471		hypothetical protein	172	172	1	11	4321				524	524	524		1	1	1	1	1	1	1	1	1	1	1	1	1	1	1	1	1	1	1	1	1	1	1	1	1	1	1	1	1	1	1	1	1	1	1
group_5472		hypothetical protein	172	172	1	11	1415				236	236	236		1	1	1	1	1	1	1	1	1	1	1	1	1	1	1	1	1	1	1	1	1	1	1	1	1	1	1	1	1	1	1	1	1	1	1
fabD		Malonyl CoA-acyl carrier protein transacylase	172	172	1	11	3713				926	926	926		1	1	1	1	1	1	1	1	1	1	1	1	1	1	1	1	1	1	1	1	1	1	1	1	1	1	1	1	1	1	1	1	1	1	1
cysJ		Sulfite reductase [NADPH] flavoprotein alpha-component	172	172	1	11	5050				1880	1880	1880		1	1	1	1	1	1	1	1	1	1	1	1	1	1	1	1	1	1	1	1	1	1	1	1	1	1	1	1	1	1	1	1	1	1	1
fpgS		Folylpolyglutamate synthase	172	172	1	11	3049				1271	1271	1271		1	1	1	1	1	1	1	1	1	1	1	1	1	1	1	1	1	1	1	1	1	1	1	1	1	1	1	1	1	1	1	1	1	1	1
mleN_1		Malate-2H(+)/Na(+)-lactate antiporter	172	172	1	11	5857				1295	1313	1310		1	1	1	1	1	1	1	1	1	1	1	1	1	1	1	1	1	1	1	1	1	1	1	1	1	1	1	1	1	1	1	1	1	1	1
ftsY		Signal recognition particle receptor FtsY	172	172	1	11	3708				1250	1250	1250		1	1	1	1	1	1	1	1	1	1	1	1	1	1	1	1	1	1	1	1	1	1	1	1	1	1	1	1	1	1	1	1	1	1	1
group_5480		Putative 5'(3')-deoxyribonucleotidase	172	172	1	11	1382				542	548	542		1	1	1	1	1	1	1	1	1	1	1	1	1	1	1	1	1	1	1	1	1	1	1	1	1	1	1	1	1	1	1	1	1	1	1
purM		Phosphoribosylformylglycinamidine cyclo-ligase	172	172	1	11	4019				1028	1028	1028		1	1	1	1	1	1	1	1	1	1	1	1	1	1	1	1	1	1	1	1	1	1	1	1	1	1	1	1	1	1	1	1	1	1	1
purF		Amidophosphoribosyltransferase	172	172	1	11	4020				1484	1484	1484		1	1	1	1	1	1	1	1	1	1	1	1	1	1	1	1	1	1	1	1	1	1	1	1	1	1	1	1	1	1	1	1	1	1	1
pxpA		5-oxoprolinase subunit A	172	172	1	11	3098				752	752	752		1	1	1	1	1	1	1	1	1	1	1	1	1	1	1	1	1	1	1	1	1	1	1	1	1	1	1	1	1	1	1	1	1	1	1
group_5487		hypothetical protein	172	172	1	11	5151				680	680	680		1	1	1	1	1	1	1	1	1	1	1	1	1	1	1	1	1	1	1	1	1	1	1	1	1	1	1	1	1	1	1	1	1	1	1
mhqR		HTH-type transcriptional regulator MhqR	172	172	1	11	5164				434	434	434		1	1	1	1	1	1	1	1	1	1	1	1	1	1	1	1	1	1	1	1	1	1	1	1	1	1	1	1	1	1	1	1	1	1	1
rlmCD		23S rRNA (uracil-C(5))-methyltransferase RlmCD	172	172	1	11	1979				1361	1361	1361		1	1	1	1	1	1	1	1	1	1	1	1	1	1	1	1	1	1	1	1	1	1	1	1	1	1	1	1	1	1	1	1	1	1	1
rihB		Pyrimidine-specific ribonucleoside hydrolase RihB	172	172	1	11	163				941	941	941		1	1	1	1	1	1	1	1	1	1	1	1	1	1	1	1	1	1	1	1	1	1	1	1	1	1	1	1	1	1	1	1	1	1	1
hisB		Imidazoleglycerol-phosphate dehydratase	172	172	1	11	4965				578	578	578		1	1	1	1	1	1	1	1	1	1	1	1	1	1	1	1	1	1	1	1	1	1	1	1	1	1	1	1	1	1	1	1	1	1	1
acsA_2		Acetyl-coenzyme A synthetase	172	172	1	11	5063				1598	1619	1603		1	1	1	1	1	1	1	1	1	1	1	1	1	1	1	1	1	1	1	1	1	1	1	1	1	1	1	1	1	1	1	1	1	1	1
group_5496		hypothetical protein	172	172	1	11	3674				284	284	284		1	1	1	1	1	1	1	1	1	1	1	1	1	1	1	1	1	1	1	1	1	1	1	1	1	1	1	1	1	1	1	1	1	1	1
ribD		Riboflavin biosynthesis protein RibD	172	172	1	11	2826				1031	1043	1036		1	1	1	1	1	1	1	1	1	1	1	1	1	1	1	1	1	1	1	1	1	1	1	1	1	1	1	1	1	1	1	1	1	1	1
group_5498		hypothetical protein	172	172	1	11	4036				470	470	470		1	1	1	1	1	1	1	1	1	1	1	1	1	1	1	1	1	1	1	1	1	1	1	1	1	1	1	1	1	1	1	1	1	1	1
tarF		Teichoic acid glycerol-phosphate transferase	172	172	1	11	4620				1169	1169	1169		1	1	1	1	1	1	1	1	1	1	1	1	1	1	1	1	1	1	1	1	1	1	1	1	1	1	1	1	1	1	1	1	1	1	1
group_5500		hypothetical protein	172	172	1	11	4332				269	269	269		1	1	1	1	1	1	1	1	1	1	1	1	1	1	1	1	1	1	1	1	1	1	1	1	1	1	1	1	1	1	1	1	1	1	1
group_5501		hypothetical protein	172	172	1	11	3971				1037	1037	1037		1	1	1	1	1	1	1	1	1	1	1	1	1	1	1	1	1	1	1	1	1	1	1	1	1	1	1	1	1	1	1	1	1	1	1
fdhD		Sulfur carrier protein FdhD	172	172	1	11	160				797	797	797		1	1	1	1	1	1	1	1	1	1	1	1	1	1	1	1	1	1	1	1	1	1	1	1	1	1	1	1	1	1	1	1	1	1	1
group_5504		Putative phosphoesterase	172	172	1	11	4076				509	509	509		1	1	1	1	1	1	1	1	1	1	1	1	1	1	1	1	1	1	1	1	1	1	1	1	1	1	1	1	1	1	1	1	1	1	1
yeeD		Putative sulfur carrier protein YeeD	172	172	1	11	1469				224	224	224		1	1	1	1	1	1	1	1	1	1	1	1	1	1	1	1	1	1	1	1	1	1	1	1	1	1	1	1	1	1	1	1	1	1	1
group_5510		Putative bifunctional exonuclease/endonuclease protein	172	172	1	11	1976				554	554	554		1	1	1	1	1	1	1	1	1	1	1	1	1	1	1	1	1	1	1	1	1	1	1	1	1	1	1	1	1	1	1	1	1	1	1
xseB		Exodeoxyribonuclease 7 small subunit	172	172	1	11	3178				230	230	230		1	1	1	1	1	1	1	1	1	1	1	1	1	1	1	1	1	1	1	1	1	1	1	1	1	1	1	1	1	1	1	1	1	1	1
purS		Phosphoribosylformylglycinamidine synthase subunit PurS	172	172	1	11	4023				263	263	263		1	1	1	1	1	1	1	1	1	1	1	1	1	1	1	1	1	1	1	1	1	1	1	1	1	1	1	1	1	1	1	1	1	1	1
rpsN2		Alternate 30S ribosomal protein S14	172	172	1	11	3429				269	269	269		1	1	1	1	1	1	1	1	1	1	1	1	1	1	1	1	1	1	1	1	1	1	1	1	1	1	1	1	1	1	1	1	1	1	1
tpx		Thiol peroxidase	172	172	1	11	2998				494	494	494		1	1	1	1	1	1	1	1	1	1	1	1	1	1	1	1	1	1	1	1	1	1	1	1	1	1	1	1	1	1	1	1	1	1	1
gyrA		DNA gyrase subunit A	172	172	1	11	4919				2660	2669	2666		1	1	1	1	1	1	1	1	1	1	1	1	1	1	1	1	1	1	1	1	1	1	1	1	1	1	1	1	1	1	1	1	1	1	1
group_5520		Isoleucine 2-epimerase	172	172	1	11	5068				1337	1337	1337		1	1	1	1	1	1	1	1	1	1	1	1	1	1	1	1	1	1	1	1	1	1	1	1	1	1	1	1	1	1	1	1	1	1	1
malL		Oligo-1,6-glucosidase	172	172	1	11	3195				1649	1649	1649		1	1	1	1	1	1	1	1	1	1	1	1	1	1	1	1	1	1	1	1	1	1	1	1	1	1	1	1	1	1	1	1	1	1	1
group_5523		Soluble hydrogenase 42 kDa subunit	172	172	1	11	2880				1157	1160	1157		1	1	1	1	1	1	1	1	1	1	1	1	1	1	1	1	1	1	1	1	1	1	1	1	1	1	1	1	1	1	1	1	1	1	1
group_5524		hypothetical protein	172	172	1	11	4066				1514	1514	1514		1	1	1	1	1	1	1	1	1	1	1	1	1	1	1	1	1	1	1	1	1	1	1	1	1	1	1	1	1	1	1	1	1	1	1
group_5525		hypothetical protein	172	172	1	11	4467				620	629	628		1	1	1	1	1	1	1	1	1	1	1	1	1	1	1	1	1	1	1	1	1	1	1	1	1	1	1	1	1	1	1	1	1	1	1
rsbW		Serine-protein kinase RsbW	172	172	1	11	3755				479	479	479		1	1	1	1	1	1	1	1	1	1	1	1	1	1	1	1	1	1	1	1	1	1	1	1	1	1	1	1	1	1	1	1	1	1	1
group_5527		hypothetical protein	172	172	1	11	4158				236	236	236		1	1	1	1	1	1	1	1	1	1	1	1	1	1	1	1	1	1	1	1	1	1	1	1	1	1	1	1	1	1	1	1	1	1	1
ywlC		Threonylcarbamoyl-AMP synthase	172	172	1	11	3831				1046	1046	1046		1	1	1	1	1	1	1	1	1	1	1	1	1	1	1	1	1	1	1	1	1	1	1	1	1	1	1	1	1	1	1	1	1	1	1
group_5529		hypothetical protein	172	172	1	11	5018				2951	2981	2980		1	1	1	1	1	1	1	1	1	1	1	1	1	1	1	1	1	1	1	1	1	1	1	1	1	1	1	1	1	1	1	1	1	1	1
tsaD		tRNA N6-adenosine threonylcarbamoyltransferase	172	172	1	11	1464				1025	1025	1025		1	1	1	1	1	1	1	1	1	1	1	1	1	1	1	1	1	1	1	1	1	1	1	1	1	1	1	1	1	1	1	1	1	1	1
mrcA		Penicillin-binding protein 1A	172	172	1	11	2873				905	905	905		1	1	1	1	1	1	1	1	1	1	1	1	1	1	1	1	1	1	1	1	1	1	1	1	1	1	1	1	1	1	1	1	1	1	1
group_5532		hypothetical protein	172	172	1	11	3805				230	230	230		1	1	1	1	1	1	1	1	1	1	1	1	1	1	1	1	1	1	1	1	1	1	1	1	1	1	1	1	1	1	1	1	1	1	1
group_5533		hypothetical protein	172	172	1	11	3483				1238	1241	1238		1	1	1	1	1	1	1	1	1	1	1	1	1	1	1	1	1	1	1	1	1	1	1	1	1	1	1	1	1	1	1	1	1	1	1
pbpH		Penicillin-binding protein H	172	172	1	11	3150				2075	2075	2075		1	1	1	1	1	1	1	1	1	1	1	1	1	1	1	1	1	1	1	1	1	1	1	1	1	1	1	1	1	1	1	1	1	1	1
feuB		Iron-uptake system permease protein FeuB	172	172	1	11	1264				1004	1004	1004		1	1	1	1	1	1	1	1	1	1	1	1	1	1	1	1	1	1	1	1	1	1	1	1	1	1	1	1	1	1	1	1	1	1	1
group_5538		putative protein	172	172	1	11	2006				1028	1028	1028		1	1	1	1	1	1	1	1	1	1	1	1	1	1	1	1	1	1	1	1	1	1	1	1	1	1	1	1	1	1	1	1	1	1	1
glvR		HTH-type transcriptional regulator GlvR	172	172	1	11	5859				764	764	764		1	1	1	1	1	1	1	1	1	1	1	1	1	1	1	1	1	1	1	1	1	1	1	1	1	1	1	1	1	1	1	1	1	1	1
group_5541		hypothetical protein	172	172	1	11	5858				506	506	506		1	1	1	1	1	1	1	1	1	1	1	1	1	1	1	1	1	1	1	1	1	1	1	1	1	1	1	1	1	1	1	1	1	1	1
xpt		Xanthine phosphoribosyltransferase	172	172	1	11	4428				578	578	578		1	1	1	1	1	1	1	1	1	1	1	1	1	1	1	1	1	1	1	1	1	1	1	1	1	1	1	1	1	1	1	1	1	1	1
trpB		Tryptophan synthase beta chain	172	172	1	11	3390				1214	1214	1214		1	1	1	1	1	1	1	1	1	1	1	1	1	1	1	1	1	1	1	1	1	1	1	1	1	1	1	1	1	1	1	1	1	1	1
rpsQ		30S ribosomal protein S17	172	172	1	11	121				263	263	263		1	1	1	1	1	1	1	1	1	1	1	1	1	1	1	1	1	1	1	1	1	1	1	1	1	1	1	1	1	1	1	1	1	1	1
ispE		4-diphosphocytidyl-2-C-methyl-D-erythritol kinase	172	172	1	12	39				848	848	848		1	1	1	1	1	1	1	1	1	1	1	1	1	1	1	1	1	1	1	1	1	1	1	1	1	1	1	1	1	1	1	1	1	1	1
mutY		Adenine DNA glycosylase	172	172	1	11	1924				1037	1037	1037		1	1	1	1	1	1	1	1	1	1	1	1	1	1	1	1	1	1	1	1	1	1	1	1	1	1	1	1	1	1	1	1	1	1	1
group_5554		putative acetyl-CoA acyltransferase	172	172	1	11	4465				1181	1181	1181		1	1	1	1	1	1	1	1	1	1	1	1	1	1	1	1	1	1	1	1	1	1	1	1	1	1	1	1	1	1	1	1	1	1	1
leuS		Leucine--tRNA ligase	172	172	1	11	2837				2417	2417	2417		1	1	1	1	1	1	1	1	1	1	1	1	1	1	1	1	1	1	1	1	1	1	1	1	1	1	1	1	1	1	1	1	1	1	1
lytR		Sensory transduction protein LytR	172	172	1	11	4612				740	740	740		1	1	1	1	1	1	1	1	1	1	1	1	1	1	1	1	1	1	1	1	1	1	1	1	1	1	1	1	1	1	1	1	1	1	1
dtd3		D-aminoacyl-tRNA deacylase	172	172	1	12	11				773	773	773		1	1	1	1	1	1	1	1	1	1	1	1	1	1	1	1	1	1	1	1	1	1	1	1	1	1	1	1	1	1	1	1	1	1	1
group_5558		hypothetical protein	172	172	1	11	4064				218	218	218		1	1	1	1	1	1	1	1	1	1	1	1	1	1	1	1	1	1	1	1	1	1	1	1	1	1	1	1	1	1	1	1	1	1	1
group_5559		putative CtpA-like serine protease	172	172	1	11	3339				1490	1490	1490		1	1	1	1	1	1	1	1	1	1	1	1	1	1	1	1	1	1	1	1	1	1	1	1	1	1	1	1	1	1	1	1	1	1	1
sarS		HTH-type transcriptional regulator SarS	172	172	1	11	4805				752	752	752		1	1	1	1	1	1	1	1	1	1	1	1	1	1	1	1	1	1	1	1	1	1	1	1	1	1	1	1	1	1	1	1	1	1	1
tcyP		L-cystine uptake protein TcyP	172	172	1	11	4432				1388	1388	1388		1	1	1	1	1	1	1	1	1	1	1	1	1	1	1	1	1	1	1	1	1	1	1	1	1	1	1	1	1	1	1	1	1	1	1
group_5564		hypothetical protein	172	172	1	11	3169				218	218	218		1	1	1	1	1	1	1	1	1	1	1	1	1	1	1	1	1	1	1	1	1	1	1	1	1	1	1	1	1	1	1	1	1	1	1
yghA		putative oxidoreductase YghA	172	172	1	11	5855				881	881	881		1	1	1	1	1	1	1	1	1	1	1	1	1	1	1	1	1	1	1	1	1	1	1	1	1	1	1	1	1	1	1	1	1	1	1
COQ5		2-methoxy-6-polyprenyl-1,4-benzoquinol methylase, mitochondrial	172	172	1	11	4603				761	761	761		1	1	1	1	1	1	1	1	1	1	1	1	1	1	1	1	1	1	1	1	1	1	1	1	1	1	1	1	1	1	1	1	1	1	1
group_5569		hypothetical protein	172	172	1	11	2012				557	557	557		1	1	1	1	1	1	1	1	1	1	1	1	1	1	1	1	1	1	1	1	1	1	1	1	1	1	1	1	1	1	1	1	1	1	1
rbgA		Ribosome biogenesis GTPase A	172	172	1	11	3700				884	884	884		1	1	1	1	1	1	1	1	1	1	1	1	1	1	1	1	1	1	1	1	1	1	1	1	1	1	1	1	1	1	1	1	1	1	1
folD		Bifunctional protein FolD protein	172	172	1	11	4027				860	860	860		1	1	1	1	1	1	1	1	1	1	1	1	1	1	1	1	1	1	1	1	1	1	1	1	1	1	1	1	1	1	1	1	1	1	1
yccX		Acylphosphatase	172	172	1	11	3359				269	269	269		1	1	1	1	1	1	1	1	1	1	1	1	1	1	1	1	1	1	1	1	1	1	1	1	1	1	1	1	1	1	1	1	1	1	1
epsL		putative sugar transferase EpsL	172	172	1	11	4738				557	557	557		1	1	1	1	1	1	1	1	1	1	1	1	1	1	1	1	1	1	1	1	1	1	1	1	1	1	1	1	1	1	1	1	1	1	1
mrnC		Mini-ribonuclease 3	172	172	1	11	1004				404	404	404		1	1	1	1	1	1	1	1	1	1	1	1	1	1	1	1	1	1	1	1	1	1	1	1	1	1	1	1	1	1	1	1	1	1	1
ureF		Urease accessory protein UreF	172	172	1	11	171				689	689	689		1	1	1	1	1	1	1	1	1	1	1	1	1	1	1	1	1	1	1	1	1	1	1	1	1	1	1	1	1	1	1	1	1	1	1
metQ_1		putative D-methionine-binding lipoprotein MetQ	172	172	1	11	4334				842	842	842		1	1	1	1	1	1	1	1	1	1	1	1	1	1	1	1	1	1	1	1	1	1	1	1	1	1	1	1	1	1	1	1	1	1	1
menG		Demethylmenaquinone methyltransferase	172	172	1	11	3281				725	725	725		1	1	1	1	1	1	1	1	1	1	1	1	1	1	1	1	1	1	1	1	1	1	1	1	1	1	1	1	1	1	1	1	1	1	1
group_5582		putative peptidase	172	172	1	11	3003				1055	1055	1055		1	1	1	1	1	1	1	1	1	1	1	1	1	1	1	1	1	1	1	1	1	1	1	1	1	1	1	1	1	1	1	1	1	1	1
alr1_1		Alanine racemase 1	172	172	1	11	3364				1085	1085	1085		1	1	1	1	1	1	1	1	1	1	1	1	1	1	1	1	1	1	1	1	1	1	1	1	1	1	1	1	1	1	1	1	1	1	1
scmP_3		N-acetylcysteine deacetylase	172	172	1	11	3365				1151	1151	1151		1	1	1	1	1	1	1	1	1	1	1	1	1	1	1	1	1	1	1	1	1	1	1	1	1	1	1	1	1	1	1	1	1	1	1
group_5588		hypothetical protein	172	172	1	11	3353				203	203	203		1	1	1	1	1	1	1	1	1	1	1	1	1	1	1	1	1	1	1	1	1	1	1	1	1	1	1	1	1	1	1	1	1	1	1
group_559	brnQ_2	Branched-chain amino acid transport system 2 carrier protein	172	172	1	11	4532				956	1310	1253		1	1	1	1	1	1	1	1	1	1	1	1	1	1	1	1	1	1	1	1	1	1	1	1	1	1	1	1	1	1	1	1	1	1	1
srtA		Sortase A	172	172	1	11	5155				620	620	620		1	1	1	1	1	1	1	1	1	1	1	1	1	1	1	1	1	1	1	1	1	1	1	1	1	1	1	1	1	1	1	1	1	1	1
serA		D-3-phosphoglycerate dehydrogenase	172	172	1	11	2879				1604	1604	1604		1	1	1	1	1	1	1	1	1	1	1	1	1	1	1	1	1	1	1	1	1	1	1	1	1	1	1	1	1	1	1	1	1	1	1
bglA		Aryl-phospho-beta-D-glucosidase BglA	172	172	1	11	4606				1436	1436	1436		1	1	1	1	1	1	1	1	1	1	1	1	1	1	1	1	1	1	1	1	1	1	1	1	1	1	1	1	1	1	1	1	1	1	1
group_5594		putative transcriptional regulatory protein	172	172	1	11	1291				716	716	716		1	1	1	1	1	1	1	1	1	1	1	1	1	1	1	1	1	1	1	1	1	1	1	1	1	1	1	1	1	1	1	1	1	1	1
ribU		Riboflavin transporter RibU	172	172	1	11	3268				545	545	545		1	1	1	1	1	1	1	1	1	1	1	1	1	1	1	1	1	1	1	1	1	1	1	1	1	1	1	1	1	1	1	1	1	1	1
catE_2		Catechol-2,3-dioxygenase	172	172	1	11	3867				797	797	797		1	1	1	1	1	1	1	1	1	1	1	1	1	1	1	1	1	1	1	1	1	1	1	1	1	1	1	1	1	1	1	1	1	1	1
group_5598		hypothetical protein	172	172	1	11	5091				1340	1346	1344		1	1	1	1	1	1	1	1	1	1	1	1	1	1	1	1	1	1	1	1	1	1	1	1	1	1	1	1	1	1	1	1	1	1	1
rsmC		Ribosomal RNA small subunit methyltransferase C	172	172	1	11	1014				608	608	608		1	1	1	1	1	1	1	1	1	1	1	1	1	1	1	1	1	1	1	1	1	1	1	1	1	1	1	1	1	1	1	1	1	1	1
group_5602		hypothetical protein	172	172	1	11	5081				449	449	449		1	1	1	1	1	1	1	1	1	1	1	1	1	1	1	1	1	1	1	1	1	1	1	1	1	1	1	1	1	1	1	1	1	1	1
group_5603		hypothetical protein	172	172	1	11	3340				509	509	509		1	1	1	1	1	1	1	1	1	1	1	1	1	1	1	1	1	1	1	1	1	1	1	1	1	1	1	1	1	1	1	1	1	1	1
ahpF		Alkyl hydroperoxide reductase subunit F	172	172	1	11	4435				1523	1523	1523		1	1	1	1	1	1	1	1	1	1	1	1	1	1	1	1	1	1	1	1	1	1	1	1	1	1	1	1	1	1	1	1	1	1	1
group_5606		hypothetical protein	172	172	1	11	3833				524	524	524		1	1	1	1	1	1	1	1	1	1	1	1	1	1	1	1	1	1	1	1	1	1	1	1	1	1	1	1	1	1	1	1	1	1	1
mutM		Formamidopyrimidine-DNA glycosylase	172	172	1	11	3024				872	872	872		1	1	1	1	1	1	1	1	1	1	1	1	1	1	1	1	1	1	1	1	1	1	1	1	1	1	1	1	1	1	1	1	1	1	1
yycJ		Putative metallo-hydrolase YycJ	172	172	1	11	4902				791	800	797		1	1	1	1	1	1	1	1	1	1	1	1	1	1	1	1	1	1	1	1	1	1	1	1	1	1	1	1	1	1	1	1	1	1	1
group_5611		hypothetical protein	172	172	1	11	5145				410	410	410		1	1	1	1	1	1	1	1	1	1	1	1	1	1	1	1	1	1	1	1	1	1	1	1	1	1	1	1	1	1	1	1	1	1	1
pstA		Phosphate transport system permease protein PstA	172	172	1	11	3375				917	917	917		1	1	1	1	1	1	1	1	1	1	1	1	1	1	1	1	1	1	1	1	1	1	1	1	1	1	1	1	1	1	1	1	1	1	1
iolG		Inositol 2-dehydrogenase/D-chiro-inositol 3-dehydrogenase	172	172	1	11	4659				1040	1040	1040		1	1	1	1	1	1	1	1	1	1	1	1	1	1	1	1	1	1	1	1	1	1	1	1	1	1	1	1	1	1	1	1	1	1	1
rimI		[Ribosomal protein S18]-alanine N-acetyltransferase	172	172	1	11	1463				464	464	464		1	1	1	1	1	1	1	1	1	1	1	1	1	1	1	1	1	1	1	1	1	1	1	1	1	1	1	1	1	1	1	1	1	1	1
ddl		D-alanine--D-alanine ligase	172	172	1	11	3773				1070	1070	1070		1	1	1	1	1	1	1	1	1	1	1	1	1	1	1	1	1	1	1	1	1	1	1	1	1	1	1	1	1	1	1	1	1	1	1
uvrA		UvrABC system protein A	172	172	1	11	1417				2828	2846	2844		1	1	1	1	1	1	1	1	1	1	1	1	1	1	1	1	1	1	1	1	1	1	1	1	1	1	1	1	1	1	1	1	1	1	1
tarJ'		Ribulose-5-phosphate reductase 2	172	172	1	11	4622				1025	1025	1025		1	1	1	1	1	1	1	1	1	1	1	1	1	1	1	1	1	1	1	1	1	1	1	1	1	1	1	1	1	1	1	1	1	1	1
pgi		Glucose-6-phosphate isomerase	172	172	1	11	4134				1331	1331	1331		1	1	1	1	1	1	1	1	1	1	1	1	1	1	1	1	1	1	1	1	1	1	1	1	1	1	1	1	1	1	1	1	1	1	1
purH		Bifunctional purine biosynthesis protein PurH	172	172	1	11	4017				1478	1478	1478		1	1	1	1	1	1	1	1	1	1	1	1	1	1	1	1	1	1	1	1	1	1	1	1	1	1	1	1	1	1	1	1	1	1	1
pbuE		Purine efflux pump PbuE	172	172	1	11	5649				1184	1190	1186		1	1	1	1	1	1	1	1	1	1	1	1	1	1	1	1	1	1	1	1	1	1	1	1	1	1	1	1	1	1	1	1	1	1	1
mccB		Cystathionine gamma-lyase	172	172	1	11	4337				1142	1142	1142		1	1	1	1	1	1	1	1	1	1	1	1	1	1	1	1	1	1	1	1	1	1	1	1	1	1	1	1	1	1	1	1	1	1	1
group_5627		hypothetical protein	172	172	1	11	5235				266	266	266		1	1	1	1	1	1	1	1	1	1	1	1	1	1	1	1	1	1	1	1	1	1	1	1	1	1	1	1	1	1	1	1	1	1	1
group_5628		hypothetical protein	172	172	1	11	2015				740	740	740		1	1	1	1	1	1	1	1	1	1	1	1	1	1	1	1	1	1	1	1	1	1	1	1	1	1	1	1	1	1	1	1	1	1	1
oxyR		Hydrogen peroxide-inducible genes activator	172	172	1	11	1324				866	866	866		1	1	1	1	1	1	1	1	1	1	1	1	1	1	1	1	1	1	1	1	1	1	1	1	1	1	1	1	1	1	1	1	1	1	1
feuC		Iron-uptake system permease protein FeuC	172	172	1	11	1265				1016	1016	1016		1	1	1	1	1	1	1	1	1	1	1	1	1	1	1	1	1	1	1	1	1	1	1	1	1	1	1	1	1	1	1	1	1	1	1
xerC_2		Tyrosine recombinase XerC	172	172	1	11	3689				896	896	896		1	1	1	1	1	1	1	1	1	1	1	1	1	1	1	1	1	1	1	1	1	1	1	1	1	1	1	1	1	1	1	1	1	1	1
ccpA		Catabolite control protein A	172	172	1	11	2866				989	989	989		1	1	1	1	1	1	1	1	1	1	1	1	1	1	1	1	1	1	1	1	1	1	1	1	1	1	1	1	1	1	1	1	1	1	1
pepF1_2		Oligoendopeptidase F, plasmid	172	172	1	11	3378				1814	1814	1814		1	1	1	1	1	1	1	1	1	1	1	1	1	1	1	1	1	1	1	1	1	1	1	1	1	1	1	1	1	1	1	1	1	1	1
ytkD		Putative 8-oxo-dGTP diphosphatase YtkD	172	172	1	11	2802				479	479	479		1	1	1	1	1	1	1	1	1	1	1	1	1	1	1	1	1	1	1	1	1	1	1	1	1	1	1	1	1	1	1	1	1	1	1
panC		Pantothenate synthetase	172	172	1	11	5074				851	851	851		1	1	1	1	1	1	1	1	1	1	1	1	1	1	1	1	1	1	1	1	1	1	1	1	1	1	1	1	1	1	1	1	1	1	1
nupC_1		Nucleoside permease NupC	172	172	1	11	4521				743	1220	1167		1	1	1	1	1	1	1	1	1	1	1	1	1	1	1	1	1	1	1	1	1	1	1	1	1	1	1	1	1	1	1	1	1	1	1
salA		Iron-sulfur cluster carrier protein	172	172	1	11	38				1064	1064	1064		1	1	1	1	1	1	1	1	1	1	1	1	1	1	1	1	1	1	1	1	1	1	1	1	1	1	1	1	1	1	1	1	1	1	1
liaR		Transcriptional regulatory protein LiaR	172	172	1	11	2694				623	623	623		1	1	1	1	1	1	1	1	1	1	1	1	1	1	1	1	1	1	1	1	1	1	1	1	1	1	1	1	1	1	1	1	1	1	1
mhqA_3		Putative ring-cleaving dioxygenase MhqA	172	172	1	11	5165				959	968	961		1	1	1	1	1	1	1	1	1	1	1	1	1	1	1	1	1	1	1	1	1	1	1	1	1	1	1	1	1	1	1	1	1	1	1
yqeH		putative protein YqeH	172	172	1	11	3105				1100	1100	1100		1	1	1	1	1	1	1	1	1	1	1	1	1	1	1	1	1	1	1	1	1	1	1	1	1	1	1	1	1	1	1	1	1	1	1
dltC		D-alanyl carrier protein	172	172	1	11	4163				236	236	236		1	1	1	1	1	1	1	1	1	1	1	1	1	1	1	1	1	1	1	1	1	1	1	1	1	1	1	1	1	1	1	1	1	1	1
cpnA		Cyclopentanol dehydrogenase	172	172	1	11	5095				704	704	704		1	1	1	1	1	1	1	1	1	1	1	1	1	1	1	1	1	1	1	1	1	1	1	1	1	1	1	1	1	1	1	1	1	1	1
nanE		Putative N-acetylmannosamine-6-phosphate 2-epimerase	172	172	1	11	4516				668	668	668		1	1	1	1	1	1	1	1	1	1	1	1	1	1	1	1	1	1	1	1	1	1	1	1	1	1	1	1	1	1	1	1	1	1	1
yfnB		Putative HAD-hydrolase YfnB	172	172	1	11	3886				686	686	686		1	1	1	1	1	1	1	1	1	1	1	1	1	1	1	1	1	1	1	1	1	1	1	1	1	1	1	1	1	1	1	1	1	1	1
coaW		Type II pantothenate kinase	172	172	1	11	3817				803	803	803		1	1	1	1	1	1	1	1	1	1	1	1	1	1	1	1	1	1	1	1	1	1	1	1	1	1	1	1	1	1	1	1	1	1	1
rsmG		Ribosomal RNA small subunit methyltransferase G	172	172	1	11	4929				719	719	719		1	1	1	1	1	1	1	1	1	1	1	1	1	1	1	1	1	1	1	1	1	1	1	1	1	1	1	1	1	1	1	1	1	1	1
purE		N5-carboxyaminoimidazole ribonucleotide mutase	172	172	1	11	4026				482	482	482		1	1	1	1	1	1	1	1	1	1	1	1	1	1	1	1	1	1	1	1	1	1	1	1	1	1	1	1	1	1	1	1	1	1	1
group_566		Lipoate--protein ligase 2	172	172	1	11	4494				1022	1022	1022		1	1	1	1	1	1	1	1	1	1	1	1	1	1	1	1	1	1	1	1	1	1	1	1	1	1	1	1	1	1	1	1	1	1	1
rpsS		30S ribosomal protein S19	172	172	1	11	126				278	278	278		1	1	1	1	1	1	1	1	1	1	1	1	1	1	1	1	1	1	1	1	1	1	1	1	1	1	1	1	1	1	1	1	1	1	1
group_5662		hypothetical protein	172	172	1	11	45				260	260	260		1	1	1	1	1	1	1	1	1	1	1	1	1	1	1	1	1	1	1	1	1	1	1	1	1	1	1	1	1	1	1	1	1	1	1
btuD_3		Vitamin B12 import ATP-binding protein BtuD	172	172	1	11	2018				896	896	896		1	1	1	1	1	1	1	1	1	1	1	1	1	1	1	1	1	1	1	1	1	1	1	1	1	1	1	1	1	1	1	1	1	1	1
group_5666		hypothetical protein	172	172	1	11	3821				521	521	521		1	1	1	1	1	1	1	1	1	1	1	1	1	1	1	1	1	1	1	1	1	1	1	1	1	1	1	1	1	1	1	1	1	1	1
group_5667		Farnesyl diphosphate synthase	172	172	1	11	3179				881	881	881		1	1	1	1	1	1	1	1	1	1	1	1	1	1	1	1	1	1	1	1	1	1	1	1	1	1	1	1	1	1	1	1	1	1	1
aldC_1		Alpha-acetolactate decarboxylase	172	172	1	11	5071				704	704	704		1	1	1	1	1	1	1	1	1	1	1	1	1	1	1	1	1	1	1	1	1	1	1	1	1	1	1	1	1	1	1	1	1	1	1
group_567		hypothetical protein	172	172	1	11	4448				368	368	368		1	1	1	1	1	1	1	1	1	1	1	1	1	1	1	1	1	1	1	1	1	1	1	1	1	1	1	1	1	1	1	1	1	1	1
arcD		Arginine/ornithine antiporter	172	172	1	11	5032				1430	1430	1430		1	1	1	1	1	1	1	1	1	1	1	1	1	1	1	1	1	1	1	1	1	1	1	1	1	1	1	1	1	1	1	1	1	1	1
ulaA		Ascorbate-specific PTS system EIIC component	172	172	1	11	4492				1343	1346	1345		1	1	1	1	1	1	1	1	1	1	1	1	1	1	1	1	1	1	1	1	1	1	1	1	1	1	1	1	1	1	1	1	1	1	1
group_5672		hypothetical protein	172	172	1	11	1286				644	644	644		1	1	1	1	1	1	1	1	1	1	1	1	1	1	1	1	1	1	1	1	1	1	1	1	1	1	1	1	1	1	1	1	1	1	1
group_5673		hypothetical protein	172	172	1	11	3977				275	275	275		1	1	1	1	1	1	1	1	1	1	1	1	1	1	1	1	1	1	1	1	1	1	1	1	1	1	1	1	1	1	1	1	1	1	1
group_5674		hypothetical protein	172	172	1	11	3043				668	668	668		1	1	1	1	1	1	1	1	1	1	1	1	1	1	1	1	1	1	1	1	1	1	1	1	1	1	1	1	1	1	1	1	1	1	1
rsmB		Ribosomal RNA small subunit methyltransferase B	172	172	1	11	3726				1307	1307	1307		1	1	1	1	1	1	1	1	1	1	1	1	1	1	1	1	1	1	1	1	1	1	1	1	1	1	1	1	1	1	1	1	1	1	1
azoR		FMN-dependent NADH-azoreductase	172	172	1	11	4666				626	626	626		1	1	1	1	1	1	1	1	1	1	1	1	1	1	1	1	1	1	1	1	1	1	1	1	1	1	1	1	1	1	1	1	1	1	1
dnaB		Replication initiation and membrane attachment protein	172	172	1	11	3028				1400	1400	1400		1	1	1	1	1	1	1	1	1	1	1	1	1	1	1	1	1	1	1	1	1	1	1	1	1	1	1	1	1	1	1	1	1	1	1
metG		Methionine--tRNA ligase	172	172	1	12	10				1973	1973	1973		1	1	1	1	1	1	1	1	1	1	1	1	1	1	1	1	1	1	1	1	1	1	1	1	1	1	1	1	1	1	1	1	1	1	1
group_5681		hypothetical protein	172	172	1	11	3109				584	584	584		1	1	1	1	1	1	1	1	1	1	1	1	1	1	1	1	1	1	1	1	1	1	1	1	1	1	1	1	1	1	1	1	1	1	1
group_5685		hypothetical protein	172	172	1	11	4216				236	236	236		1	1	1	1	1	1	1	1	1	1	1	1	1	1	1	1	1	1	1	1	1	1	1	1	1	1	1	1	1	1	1	1	1	1	1
group_5686		hypothetical protein	172	172	1	11	4342				674	674	674		1	1	1	1	1	1	1	1	1	1	1	1	1	1	1	1	1	1	1	1	1	1	1	1	1	1	1	1	1	1	1	1	1	1	1
cdaR		CdaA regulatory protein CdaR	172	172	1	11	3789				932	932	932		1	1	1	1	1	1	1	1	1	1	1	1	1	1	1	1	1	1	1	1	1	1	1	1	1	1	1	1	1	1	1	1	1	1	1
malP		PTS system maltose-specific EIICB component	172	172	1	11	5860				1604	1604	1604		1	1	1	1	1	1	1	1	1	1	1	1	1	1	1	1	1	1	1	1	1	1	1	1	1	1	1	1	1	1	1	1	1	1	1
yheS		putative ABC transporter ATP-binding protein YheS	172	172	1	11	1466				1928	1928	1928		1	1	1	1	1	1	1	1	1	1	1	1	1	1	1	1	1	1	1	1	1	1	1	1	1	1	1	1	1	1	1	1	1	1	1
rlmI		Ribosomal RNA large subunit methyltransferase I	172	172	1	11	4008				1172	1172	1172		1	1	1	1	1	1	1	1	1	1	1	1	1	1	1	1	1	1	1	1	1	1	1	1	1	1	1	1	1	1	1	1	1	1	1
trpG_2		Anthranilate synthase component 2	172	172	1	11	1370				593	593	593		1	1	1	1	1	1	1	1	1	1	1	1	1	1	1	1	1	1	1	1	1	1	1	1	1	1	1	1	1	1	1	1	1	1	1
group_5693		N-acetylmuramoyl-L-alanine amidase domain-containing protein	172	172	1	11	5017				1859	1859	1859		1	1	1	1	1	1	1	1	1	1	1	1	1	1	1	1	1	1	1	1	1	1	1	1	1	1	1	1	1	1	1	1	1	1	1
group_5694		hypothetical protein	172	172	1	11	1205				506	506	506		1	1	1	1	1	1	1	1	1	1	1	1	1	1	1	1	1	1	1	1	1	1	1	1	1	1	1	1	1	1	1	1	1	1	1
group_5696		hypothetical protein	172	172	1	11	3972				461	461	461		1	1	1	1	1	1	1	1	1	1	1	1	1	1	1	1	1	1	1	1	1	1	1	1	1	1	1	1	1	1	1	1	1	1	1
group_5697		hypothetical protein	172	172	1	11	3862				293	293	293		1	1	1	1	1	1	1	1	1	1	1	1	1	1	1	1	1	1	1	1	1	1	1	1	1	1	1	1	1	1	1	1	1	1	1
yjbM		GTP pyrophosphokinase YjbM	172	172	1	11	4086				635	635	635		1	1	1	1	1	1	1	1	1	1	1	1	1	1	1	1	1	1	1	1	1	1	1	1	1	1	1	1	1	1	1	1	1	1	1
yjdJ		putative protein YjdJ	172	172	1	11	5163				284	284	284		1	1	1	1	1	1	1	1	1	1	1	1	1	1	1	1	1	1	1	1	1	1	1	1	1	1	1	1	1	1	1	1	1	1	1
group_5701		1,4-dihydroxy-2-naphthoyl-CoA hydrolase	172	172	1	11	3414				467	467	467		1	1	1	1	1	1	1	1	1	1	1	1	1	1	1	1	1	1	1	1	1	1	1	1	1	1	1	1	1	1	1	1	1	1	1
group_5703		hypothetical protein	172	172	1	11	3080				1013	1013	1013		1	1	1	1	1	1	1	1	1	1	1	1	1	1	1	1	1	1	1	1	1	1	1	1	1	1	1	1	1	1	1	1	1	1	1
groS		10 kDa chaperonin	172	172	1	11	1488				284	284	284		1	1	1	1	1	1	1	1	1	1	1	1	1	1	1	1	1	1	1	1	1	1	1	1	1	1	1	1	1	1	1	1	1	1	1
cysA		Sulfate/thiosulfate import ATP-binding protein CysA	172	172	1	11	157				605	605	605		1	1	1	1	1	1	1	1	1	1	1	1	1	1	1	1	1	1	1	1	1	1	1	1	1	1	1	1	1	1	1	1	1	1	1
group_5710		hypothetical protein	172	172	1	11	4179				314	314	314		1	1	1	1	1	1	1	1	1	1	1	1	1	1	1	1	1	1	1	1	1	1	1	1	1	1	1	1	1	1	1	1	1	1	1
ribE		Riboflavin synthase	172	172	1	11	2828				632	632	632		1	1	1	1	1	1	1	1	1	1	1	1	1	1	1	1	1	1	1	1	1	1	1	1	1	1	1	1	1	1	1	1	1	1	1
group_5712		hypothetical protein	172	172	1	11	3433				314	314	314		1	1	1	1	1	1	1	1	1	1	1	1	1	1	1	1	1	1	1	1	1	1	1	1	1	1	1	1	1	1	1	1	1	1	1
group_5714		hypothetical protein	172	172	1	11	2009				173	173	173		1	1	1	1	1	1	1	1	1	1	1	1	1	1	1	1	1	1	1	1	1	1	1	1	1	1	1	1	1	1	1	1	1	1	1
group_5716		hypothetical protein	172	172	1	11	1992				323	326	325		1	1	1	1	1	1	1	1	1	1	1	1	1	1	1	1	1	1	1	1	1	1	1	1	1	1	1	1	1	1	1	1	1	1	1
rsgA		Small ribosomal subunit biogenesis GTPase RsgA	172	172	1	11	3722				875	875	875		1	1	1	1	1	1	1	1	1	1	1	1	1	1	1	1	1	1	1	1	1	1	1	1	1	1	1	1	1	1	1	1	1	1	1
bdbD		Disulfide bond formation protein D	172	172	1	11	5701				599	599	599		1	1	1	1	1	1	1	1	1	1	1	1	1	1	1	1	1	1	1	1	1	1	1	1	1	1	1	1	1	1	1	1	1	1	1
opuCA		Carnitine transport ATP-binding protein OpuCA	172	172	1	11	5654				1226	1226	1226		1	1	1	1	1	1	1	1	1	1	1	1	1	1	1	1	1	1	1	1	1	1	1	1	1	1	1	1	1	1	1	1	1	1	1
accB_1		Biotin carboxyl carrier protein of acetyl-CoA carboxylase	172	172	1	11	3173				464	464	464		1	1	1	1	1	1	1	1	1	1	1	1	1	1	1	1	1	1	1	1	1	1	1	1	1	1	1	1	1	1	1	1	1	1	1
tilS		tRNA(Ile)-lysidine synthase	172	172	1	12	24				1295	1295	1295		1	1	1	1	1	1	1	1	1	1	1	1	1	1	1	1	1	1	1	1	1	1	1	1	1	1	1	1	1	1	1	1	1	1	1
metC		Cystathionine beta-lyase MetC	172	172	1	11	4461				1160	1160	1160		1	1	1	1	1	1	1	1	1	1	1	1	1	1	1	1	1	1	1	1	1	1	1	1	1	1	1	1	1	1	1	1	1	1	1
gpsA		Glycerol-3-phosphate dehydrogenase [NAD(P)+]	172	172	1	11	3278				998	998	998		1	1	1	1	1	1	1	1	1	1	1	1	1	1	1	1	1	1	1	1	1	1	1	1	1	1	1	1	1	1	1	1	1	1	1
menF		Isochorismate synthase MenF	172	172	1	11	1371				1151	1151	1151		1	1	1	1	1	1	1	1	1	1	1	1	1	1	1	1	1	1	1	1	1	1	1	1	1	1	1	1	1	1	1	1	1	1	1
group_5736		hypothetical protein	172	172	1	11	5825				551	554	553		1	1	1	1	1	1	1	1	1	1	1	1	1	1	1	1	1	1	1	1	1	1	1	1	1	1	1	1	1	1	1	1	1	1	1
group_5738		hypothetical protein	172	172	1	11	3421				467	467	467		1	1	1	1	1	1	1	1	1	1	1	1	1	1	1	1	1	1	1	1	1	1	1	1	1	1	1	1	1	1	1	1	1	1	1
pitA		L-methionine sulfoximine/L-methionine sulfone acetyltransferase	172	172	1	11	5154				491	491	491		1	1	1	1	1	1	1	1	1	1	1	1	1	1	1	1	1	1	1	1	1	1	1	1	1	1	1	1	1	1	1	1	1	1	1
group_5740		putative protein	172	172	1	11	4653				968	968	968		1	1	1	1	1	1	1	1	1	1	1	1	1	1	1	1	1	1	1	1	1	1	1	1	1	1	1	1	1	1	1	1	1	1	1
tcyB		L-cystine transport system permease protein TcyB	172	172	1	11	5695				728	728	728		1	1	1	1	1	1	1	1	1	1	1	1	1	1	1	1	1	1	1	1	1	1	1	1	1	1	1	1	1	1	1	1	1	1	1
dhaL		PTS-dependent dihydroxyacetone kinase, ADP-binding subunit DhaL	172	172	1	11	1267				584	584	584		1	1	1	1	1	1	1	1	1	1	1	1	1	1	1	1	1	1	1	1	1	1	1	1	1	1	1	1	1	1	1	1	1	1	1
tsaE		tRNA threonylcarbamoyladenosine biosynthesis protein TsaE	172	172	1	11	1461				494	494	494		1	1	1	1	1	1	1	1	1	1	1	1	1	1	1	1	1	1	1	1	1	1	1	1	1	1	1	1	1	1	1	1	1	1	1
ytnP		putative quorum-quenching lactonase YtnP	172	172	1	11	2852				842	842	842		1	1	1	1	1	1	1	1	1	1	1	1	1	1	1	1	1	1	1	1	1	1	1	1	1	1	1	1	1	1	1	1	1	1	1
rbsK		Ribokinase	172	172	1	11	4601				914	914	914		1	1	1	1	1	1	1	1	1	1	1	1	1	1	1	1	1	1	1	1	1	1	1	1	1	1	1	1	1	1	1	1	1	1	1
group_5748		hypothetical protein	172	172	1	11	4152				1154	1154	1154		1	1	1	1	1	1	1	1	1	1	1	1	1	1	1	1	1	1	1	1	1	1	1	1	1	1	1	1	1	1	1	1	1	1	1
ssuC		Putative aliphatic sulfonates transport permease protein SsuC	172	172	1	11	4709				761	761	761		1	1	1	1	1	1	1	1	1	1	1	1	1	1	1	1	1	1	1	1	1	1	1	1	1	1	1	1	1	1	1	1	1	1	1
yhaP		putative protein YhaP	172	172	1	11	5843				1232	1232	1232		1	1	1	1	1	1	1	1	1	1	1	1	1	1	1	1	1	1	1	1	1	1	1	1	1	1	1	1	1	1	1	1	1	1	1
group_5752		hypothetical protein	172	172	1	11	3983				614	614	614		1	1	1	1	1	1	1	1	1	1	1	1	1	1	1	1	1	1	1	1	1	1	1	1	1	1	1	1	1	1	1	1	1	1	1
hemW		Heme chaperone HemW	172	172	1	11	3119				1157	1157	1157		1	1	1	1	1	1	1	1	1	1	1	1	1	1	1	1	1	1	1	1	1	1	1	1	1	1	1	1	1	1	1	1	1	1	1
group_5755		hypothetical protein	172	172	1	11	4084				854	854	854		1	1	1	1	1	1	1	1	1	1	1	1	1	1	1	1	1	1	1	1	1	1	1	1	1	1	1	1	1	1	1	1	1	1	1
gsiA		Glutathione import ATP-binding protein GsiA	172	172	1	11	4672				1592	1592	1592		1	1	1	1	1	1	1	1	1	1	1	1	1	1	1	1	1	1	1	1	1	1	1	1	1	1	1	1	1	1	1	1	1	1	1
group_5757		hypothetical protein	172	172	1	11	1007				569	569	569		1	1	1	1	1	1	1	1	1	1	1	1	1	1	1	1	1	1	1	1	1	1	1	1	1	1	1	1	1	1	1	1	1	1	1
group_576		hypothetical protein	172	172	1	11	5089				296	296	296		1	1	1	1	1	1	1	1	1	1	1	1	1	1	1	1	1	1	1	1	1	1	1	1	1	1	1	1	1	1	1	1	1	1	1
pepT_1		Peptidase T	172	172	1	11	3190				1133	1133	1133		1	1	1	1	1	1	1	1	1	1	1	1	1	1	1	1	1	1	1	1	1	1	1	1	1	1	1	1	1	1	1	1	1	1	1
yabA		Initiation-control protein YabA	172	172	1	12	6				347	347	347		1	1	1	1	1	1	1	1	1	1	1	1	1	1	1	1	1	1	1	1	1	1	1	1	1	1	1	1	1	1	1	1	1	1	1
group_5763		hypothetical protein	172	172	1	11	4328				1112	1112	1112		1	1	1	1	1	1	1	1	1	1	1	1	1	1	1	1	1	1	1	1	1	1	1	1	1	1	1	1	1	1	1	1	1	1	1
mepA		Multidrug export protein MepA	172	172	1	11	4487				1355	1355	1355		1	1	1	1	1	1	1	1	1	1	1	1	1	1	1	1	1	1	1	1	1	1	1	1	1	1	1	1	1	1	1	1	1	1	1
cpdA_1		3',5'-cyclic adenosine monophosphate phosphodiesterase CpdA	172	172	1	11	5665				806	806	806		1	1	1	1	1	1	1	1	1	1	1	1	1	1	1	1	1	1	1	1	1	1	1	1	1	1	1	1	1	1	1	1	1	1	1
tarB		Teichoic acid glycerol-phosphate primase	172	172	1	11	1255				1103	1103	1103		1	1	1	1	1	1	1	1	1	1	1	1	1	1	1	1	1	1	1	1	1	1	1	1	1	1	1	1	1	1	1	1	1	1	1
group_5769		hypothetical protein	172	172	1	11	3738				401	401	401		1	1	1	1	1	1	1	1	1	1	1	1	1	1	1	1	1	1	1	1	1	1	1	1	1	1	1	1	1	1	1	1	1	1	1
group_577		hypothetical protein	172	172	1	11	5015				1883	1907	1902		1	1	1	1	1	1	1	1	1	1	1	1	1	1	1	1	1	1	1	1	1	1	1	1	1	1	1	1	1	1	1	1	1	1	1
group_5770		hypothetical protein	172	172	1	11	3967				389	389	389		1	1	1	1	1	1	1	1	1	1	1	1	1	1	1	1	1	1	1	1	1	1	1	1	1	1	1	1	1	1	1	1	1	1	1
rnr		Ribonuclease R	172	172	1	11	1439				2357	2372	2371		1	1	1	1	1	1	1	1	1	1	1	1	1	1	1	1	1	1	1	1	1	1	1	1	1	1	1	1	1	1	1	1	1	1	1
group_5772		hypothetical protein	172	172	1	11	5131				170	170	170		1	1	1	1	1	1	1	1	1	1	1	1	1	1	1	1	1	1	1	1	1	1	1	1	1	1	1	1	1	1	1	1	1	1	1
group_5773		hypothetical protein	172	172	1	11	1343				1553	1553	1553		1	1	1	1	1	1	1	1	1	1	1	1	1	1	1	1	1	1	1	1	1	1	1	1	1	1	1	1	1	1	1	1	1	1	1
ileS		Isoleucine--tRNA ligase	172	172	1	11	3868				2753	2753	2753		1	1	1	1	1	1	1	1	1	1	1	1	1	1	1	1	1	1	1	1	1	1	1	1	1	1	1	1	1	1	1	1	1	1	1
metN2		Methionine import ATP-binding protein MetN 2	172	172	1	11	4199				1025	1025	1025		1	1	1	1	1	1	1	1	1	1	1	1	1	1	1	1	1	1	1	1	1	1	1	1	1	1	1	1	1	1	1	1	1	1	1
group_5777		hypothetical protein	172	172	1	11	4904				1334	1334	1334		1	1	1	1	1	1	1	1	1	1	1	1	1	1	1	1	1	1	1	1	1	1	1	1	1	1	1	1	1	1	1	1	1	1	1
group_5779		hypothetical protein	172	172	1	11	3054				473	473	473		1	1	1	1	1	1	1	1	1	1	1	1	1	1	1	1	1	1	1	1	1	1	1	1	1	1	1	1	1	1	1	1	1	1	1
ysdC_1		Putative aminopeptidase YsdC	172	172	1	11	5646				1076	1076	1076		1	1	1	1	1	1	1	1	1	1	1	1	1	1	1	1	1	1	1	1	1	1	1	1	1	1	1	1	1	1	1	1	1	1	1
sasA		Adaptive-response sensory-kinase SasA	172	172	1	11	3021				1664	1664	1664		1	1	1	1	1	1	1	1	1	1	1	1	1	1	1	1	1	1	1	1	1	1	1	1	1	1	1	1	1	1	1	1	1	1	1
glpP		Glycerol uptake operon antiterminator regulatory protein	172	172	1	11	3492				533	533	533		1	1	1	1	1	1	1	1	1	1	1	1	1	1	1	1	1	1	1	1	1	1	1	1	1	1	1	1	1	1	1	1	1	1	1
ykoD_2		Putative HMP/thiamine import ATP-binding protein YkoD	172	172	1	11	4014				1400	1400	1400		1	1	1	1	1	1	1	1	1	1	1	1	1	1	1	1	1	1	1	1	1	1	1	1	1	1	1	1	1	1	1	1	1	1	1
purK		N5-carboxyaminoimidazole ribonucleotide synthase	172	172	1	11	4025				1124	1124	1124		1	1	1	1	1	1	1	1	1	1	1	1	1	1	1	1	1	1	1	1	1	1	1	1	1	1	1	1	1	1	1	1	1	1	1
rnhB		Ribonuclease HII	172	172	1	11	3698				767	767	767		1	1	1	1	1	1	1	1	1	1	1	1	1	1	1	1	1	1	1	1	1	1	1	1	1	1	1	1	1	1	1	1	1	1	1
modB		Molybdenum transport system permease protein ModB	172	172	1	11	158				671	671	671		1	1	1	1	1	1	1	1	1	1	1	1	1	1	1	1	1	1	1	1	1	1	1	1	1	1	1	1	1	1	1	1	1	1	1
asp1		Accessory Sec system protein Asp1	172	172	1	11	5007				1358	1553	1531		1	1	1	1	1	1	1	1	1	1	1	1	1	1	1	1	1	1	1	1	1	1	1	1	1	1	1	1	1	1	1	1	1	1	1
nrnA		Bifunctional oligoribonuclease and PAP phosphatase NrnA	172	172	1	11	3010				941	941	941		1	1	1	1	1	1	1	1	1	1	1	1	1	1	1	1	1	1	1	1	1	1	1	1	1	1	1	1	1	1	1	1	1	1	1
queA		S-adenosylmethionine:tRNA ribosyltransferase-isomerase	172	172	1	11	3064				1025	1025	1025		1	1	1	1	1	1	1	1	1	1	1	1	1	1	1	1	1	1	1	1	1	1	1	1	1	1	1	1	1	1	1	1	1	1	1
nudF		ADP-ribose pyrophosphatase	172	172	1	11	3204				542	542	542		1	1	1	1	1	1	1	1	1	1	1	1	1	1	1	1	1	1	1	1	1	1	1	1	1	1	1	1	1	1	1	1	1	1	1
phaB		Acetoacetyl-CoA reductase	172	172	1	11	3510				704	704	704		1	1	1	1	1	1	1	1	1	1	1	1	1	1	1	1	1	1	1	1	1	1	1	1	1	1	1	1	1	1	1	1	1	1	1
group_5808		hypothetical protein	172	172	1	11	5153				170	170	170		1	1	1	1	1	1	1	1	1	1	1	1	1	1	1	1	1	1	1	1	1	1	1	1	1	1	1	1	1	1	1	1	1	1	1
group_581		hypothetical protein	172	172	1	11	4997				674	692	690		1	1	1	1	1	1	1	1	1	1	1	1	1	1	1	1	1	1	1	1	1	1	1	1	1	1	1	1	1	1	1	1	1	1	1
group_5810		hypothetical protein	172	172	1	11	5866				185	185	185		1	1	1	1	1	1	1	1	1	1	1	1	1	1	1	1	1	1	1	1	1	1	1	1	1	1	1	1	1	1	1	1	1	1	1
nusB		Transcription antitermination protein NusB	172	172	1	11	3176				389	389	389		1	1	1	1	1	1	1	1	1	1	1	1	1	1	1	1	1	1	1	1	1	1	1	1	1	1	1	1	1	1	1	1	1	1	1
bcp		Putative peroxiredoxin bcp	172	172	1	11	1919				455	455	455		1	1	1	1	1	1	1	1	1	1	1	1	1	1	1	1	1	1	1	1	1	1	1	1	1	1	1	1	1	1	1	1	1	1	1
group_5816		hypothetical protein	172	172	1	11	1429			Hypothetical protein with no hits to refseq/uniprot/clusters/cdd/tigrfams/pfam overlapping another protein with hits	629	629	629		1	1	1	1	1	1	1	1	1	1	1	1	1	1	1	1	1	1	1	1	1	1	1	1	1	1	1	1	1	1	1	1	1	1	1
group_5817		hypothetical protein	172	172	1	11	3068				2273	2273	2273		1	1	1	1	1	1	1	1	1	1	1	1	1	1	1	1	1	1	1	1	1	1	1	1	1	1	1	1	1	1	1	1	1	1	1
truB		tRNA pseudouridine synthase B	172	172	1	11	3670				917	917	917		1	1	1	1	1	1	1	1	1	1	1	1	1	1	1	1	1	1	1	1	1	1	1	1	1	1	1	1	1	1	1	1	1	1	1
group_5820		hypothetical protein	172	172	1	11	1934				161	161	161		1	1	1	1	1	1	1	1	1	1	1	1	1	1	1	1	1	1	1	1	1	1	1	1	1	1	1	1	1	1	1	1	1	1	1
tsaB		tRNA threonylcarbamoyladenosine biosynthesis protein TsaB	172	172	1	11	1462				662	662	662		1	1	1	1	1	1	1	1	1	1	1	1	1	1	1	1	1	1	1	1	1	1	1	1	1	1	1	1	1	1	1	1	1	1	1
ywqE_1		Tyrosine-protein phosphatase YwqE	172	172	1	11	4752				764	764	764		1	1	1	1	1	1	1	1	1	1	1	1	1	1	1	1	1	1	1	1	1	1	1	1	1	1	1	1	1	1	1	1	1	1	1
group_5827		hypothetical protein	172	172	1	11	5054				536	536	536		1	1	1	1	1	1	1	1	1	1	1	1	1	1	1	1	1	1	1	1	1	1	1	1	1	1	1	1	1	1	1	1	1	1	1
bioY		Biotin transporter BioY	172	172	1	11	162				554	554	554		1	1	1	1	1	1	1	1	1	1	1	1	1	1	1	1	1	1	1	1	1	1	1	1	1	1	1	1	1	1	1	1	1	1	1
pcrB		Heptaprenylglyceryl phosphate synthase	172	172	1	11	1988				692	692	692		1	1	1	1	1	1	1	1	1	1	1	1	1	1	1	1	1	1	1	1	1	1	1	1	1	1	1	1	1	1	1	1	1	1	1
kdpD		Sensor protein KdpD	172	172	1	11	3769				2657	2657	2657		1	1	1	1	1	1	1	1	1	1	1	1	1	1	1	1	1	1	1	1	1	1	1	1	1	1	1	1	1	1	1	1	1	1	1
hdfR_2		HTH-type transcriptional regulator HdfR	172	172	1	11	4327				884	884	884		1	1	1	1	1	1	1	1	1	1	1	1	1	1	1	1	1	1	1	1	1	1	1	1	1	1	1	1	1	1	1	1	1	1	1
carA_1		Caffeate CoA-transferase	172	172	1	11	4640				1562	1562	1562		1	1	1	1	1	1	1	1	1	1	1	1	1	1	1	1	1	1	1	1	1	1	1	1	1	1	1	1	1	1	1	1	1	1	1
hisC_1		Histidinol-phosphate aminotransferase	172	172	1	11	4964				1013	1013	1013		1	1	1	1	1	1	1	1	1	1	1	1	1	1	1	1	1	1	1	1	1	1	1	1	1	1	1	1	1	1	1	1	1	1	1
cinA		Putative competence-damage inducible protein	172	172	1	11	3506				1151	1151	1151		1	1	1	1	1	1	1	1	1	1	1	1	1	1	1	1	1	1	1	1	1	1	1	1	1	1	1	1	1	1	1	1	1	1	1
ywtE		5-amino-6-(5-phospho-D-ribitylamino)uracil phosphatase YwtE	172	177	1.03	11	1033				869	869	869		1	1	1	1	1	1	1	1	1	1	1	1	1	1	1	1	1	1	1	1	1	1	1	1	1	1	1	1	1	1	1	1	1	1	1
pspB		Putative phosphoserine phosphatase 2	172	172	1	11	4215				581	584	581		1	1	1	1	1	1	1	1	1	1	1	1	1	1	1	1	1	1	1	1	1	1	1	1	1	1	1	1	1	1	1	1	1	1	1
plsX		Phosphate acyltransferase	172	172	1	11	3714				986	986	986		1	1	1	1	1	1	1	1	1	1	1	1	1	1	1	1	1	1	1	1	1	1	1	1	1	1	1	1	1	1	1	1	1	1	1
group_5850		hypothetical protein	172	172	1	11	3036				929	929	929		1	1	1	1	1	1	1	1	1	1	1	1	1	1	1	1	1	1	1	1	1	1	1	1	1	1	1	1	1	1	1	1	1	1	1
gatD_1		Galactitol 1-phosphate 5-dehydrogenase	172	172	1	11	4624				1043	1043	1043		1	1	1	1	1	1	1	1	1	1	1	1	1	1	1	1	1	1	1	1	1	1	1	1	1	1	1	1	1	1	1	1	1	1	1
icaD		Poly-beta-1,6-N-acetyl-D-glucosamine synthesis protein IcaD	172	172	1	11	4979				305	305	305		1	1	1	1	1	1	1	1	1	1	1	1	1	1	1	1	1	1	1	1	1	1	1	1	1	1	1	1	1	1	1	1	1	1	1
group_5854		hypothetical protein	172	172	1	11	1968				386	386	386		1	1	1	1	1	1	1	1	1	1	1	1	1	1	1	1	1	1	1	1	1	1	1	1	1	1	1	1	1	1	1	1	1	1	1
hxlB		3-hexulose-6-phosphate isomerase	172	177	1.03	11	1075				548	548	548		1	1	1	1	1	1	1	1	1	1	1	1	1	1	1	1	1	1	1	1	1	1	1	1	1	1	1	1	1	1	1	1	1	1	1
group_586		hypothetical protein	172	172	1	11	4948				464	464	464		1	1	1	1	1	1	1	1	1	1	1	1	1	1	1	1	1	1	1	1	1	1	1	1	1	1	1	1	1	1	1	1	1	1	1
yafV		Omega-amidase YafV	172	172	1	11	1483				785	785	785		1	1	1	1	1	1	1	1	1	1	1	1	1	1	1	1	1	1	1	1	1	1	1	1	1	1	1	1	1	1	1	1	1	1	1
oppD_2		Oligopeptide transport ATP-binding protein OppD	172	172	1	11	4107				1082	1082	1082		1	1	1	1	1	1	1	1	1	1	1	1	1	1	1	1	1	1	1	1	1	1	1	1	1	1	1	1	1	1	1	1	1	1	1
nrgA		Ammonium transporter	172	172	1	11	1470				1250	1250	1250		1	1	1	1	1	1	1	1	1	1	1	1	1	1	1	1	1	1	1	1	1	1	1	1	1	1	1	1	1	1	1	1	1	1	1
group_5866		hypothetical protein	172	172	1	11	4912				923	923	923		1	1	1	1	1	1	1	1	1	1	1	1	1	1	1	1	1	1	1	1	1	1	1	1	1	1	1	1	1	1	1	1	1	1	1
group_5868		hypothetical protein	172	172	1	11	3309				332	332	332		1	1	1	1	1	1	1	1	1	1	1	1	1	1	1	1	1	1	1	1	1	1	1	1	1	1	1	1	1	1	1	1	1	1	1
group_5869		hypothetical protein	172	172	1	11	46				1370	1370	1370		1	1	1	1	1	1	1	1	1	1	1	1	1	1	1	1	1	1	1	1	1	1	1	1	1	1	1	1	1	1	1	1	1	1	1
ampR		HTH-type transcriptional activator AmpR	172	172	1	11	4121				869	869	869		1	1	1	1	1	1	1	1	1	1	1	1	1	1	1	1	1	1	1	1	1	1	1	1	1	1	1	1	1	1	1	1	1	1	1
ybaK		Cys-tRNA(Pro)/Cys-tRNA(Cys) deacylase YbaK	172	172	1	11	1351				482	482	482		1	1	1	1	1	1	1	1	1	1	1	1	1	1	1	1	1	1	1	1	1	1	1	1	1	1	1	1	1	1	1	1	1	1	1
group_5874		hypothetical protein	172	172	1	11	2825				1502	1502	1502		1	1	1	1	1	1	1	1	1	1	1	1	1	1	1	1	1	1	1	1	1	1	1	1	1	1	1	1	1	1	1	1	1	1	1
bcrA_1		Bacitracin transport ATP-binding protein BcrA	172	172	1	11	5172				695	695	695		1	1	1	1	1	1	1	1	1	1	1	1	1	1	1	1	1	1	1	1	1	1	1	1	1	1	1	1	1	1	1	1	1	1	1
group_5877		hypothetical protein	172	172	1	11	4808				473	473	473		1	1	1	1	1	1	1	1	1	1	1	1	1	1	1	1	1	1	1	1	1	1	1	1	1	1	1	1	1	1	1	1	1	1	1
ymcA		putative protein YmcA	172	172	1	11	3497				365	365	365		1	1	1	1	1	1	1	1	1	1	1	1	1	1	1	1	1	1	1	1	1	1	1	1	1	1	1	1	1	1	1	1	1	1	1
nixA		Nickel transporter NixA	172	172	1	11	4943				890	1016	1014		1	1	1	1	1	1	1	1	1	1	1	1	1	1	1	1	1	1	1	1	1	1	1	1	1	1	1	1	1	1	1	1	1	1	1
cycA_1		D-serine/D-alanine/glycine transporter	172	172	1	11	3017				1361	1361	1361		1	1	1	1	1	1	1	1	1	1	1	1	1	1	1	1	1	1	1	1	1	1	1	1	1	1	1	1	1	1	1	1	1	1	1
cidA		Holin-like protein CidA	172	172	1	11	5141				395	395	395		1	1	1	1	1	1	1	1	1	1	1	1	1	1	1	1	1	1	1	1	1	1	1	1	1	1	1	1	1	1	1	1	1	1	1
spo0J		Stage 0 sporulation protein J	172	172	1	11	4459				845	845	845		1	1	1	1	1	1	1	1	1	1	1	1	1	1	1	1	1	1	1	1	1	1	1	1	1	1	1	1	1	1	1	1	1	1	1
group_5891		hypothetical protein	172	172	1	11	5829				638	638	638		1	1	1	1	1	1	1	1	1	1	1	1	1	1	1	1	1	1	1	1	1	1	1	1	1	1	1	1	1	1	1	1	1	1	1
mobA		putative molybdenum cofactor guanylyltransferase	172	172	1	11	149				599	599	599		1	1	1	1	1	1	1	1	1	1	1	1	1	1	1	1	1	1	1	1	1	1	1	1	1	1	1	1	1	1	1	1	1	1	1
group_5895		hypothetical protein	172	172	1	11	137				908	908	908		1	1	1	1	1	1	1	1	1	1	1	1	1	1	1	1	1	1	1	1	1	1	1	1	1	1	1	1	1	1	1	1	1	1	1
rplGA		putative ribosomal protein YlxQ	172	172	1	11	3673				317	317	317		1	1	1	1	1	1	1	1	1	1	1	1	1	1	1	1	1	1	1	1	1	1	1	1	1	1	1	1	1	1	1	1	1	1	1
group_5898		Polyphenol oxidase	172	172	1	11	3874				791	791	791		1	1	1	1	1	1	1	1	1	1	1	1	1	1	1	1	1	1	1	1	1	1	1	1	1	1	1	1	1	1	1	1	1	1	1
group_5899		hypothetical protein	172	172	1	11	5865				188	191	188		1	1	1	1	1	1	1	1	1	1	1	1	1	1	1	1	1	1	1	1	1	1	1	1	1	1	1	1	1	1	1	1	1	1	1
mtlD		Mannitol-1-phosphate 5-dehydrogenase	172	172	1	11	3793				1106	1106	1106		1	1	1	1	1	1	1	1	1	1	1	1	1	1	1	1	1	1	1	1	1	1	1	1	1	1	1	1	1	1	1	1	1	1	1
frmB		S-formylglutathione hydrolase	172	172	1	11	5037				761	761	761		1	1	1	1	1	1	1	1	1	1	1	1	1	1	1	1	1	1	1	1	1	1	1	1	1	1	1	1	1	1	1	1	1	1	1
group_5903		hypothetical protein	172	172	1	11	5882				491	500	496		1	1	1	1	1	1	1	1	1	1	1	1	1	1	1	1	1	1	1	1	1	1	1	1	1	1	1	1	1	1	1	1	1	1	1
tarI2		Ribitol-5-phosphate cytidylyltransferase 2	172	172	1	11	4623				716	716	716		1	1	1	1	1	1	1	1	1	1	1	1	1	1	1	1	1	1	1	1	1	1	1	1	1	1	1	1	1	1	1	1	1	1	1
group_5906		hypothetical protein	172	172	1	11	2999				947	947	947		1	1	1	1	1	1	1	1	1	1	1	1	1	1	1	1	1	1	1	1	1	1	1	1	1	1	1	1	1	1	1	1	1	1	1
rlmB		Putative TrmH family tRNA/rRNA methyltransferase	172	172	1	11	3947				740	740	740		1	1	1	1	1	1	1	1	1	1	1	1	1	1	1	1	1	1	1	1	1	1	1	1	1	1	1	1	1	1	1	1	1	1	1
group_5909		hypothetical protein	172	172	1	11	54				1976	1976	1976		1	1	1	1	1	1	1	1	1	1	1	1	1	1	1	1	1	1	1	1	1	1	1	1	1	1	1	1	1	1	1	1	1	1	1
scrB		Sucrose-6-phosphate hydrolase	172	172	1	11	1472				1484	1493	1484		1	1	1	1	1	1	1	1	1	1	1	1	1	1	1	1	1	1	1	1	1	1	1	1	1	1	1	1	1	1	1	1	1	1	1
group_5912		hypothetical protein	172	172	1	11	2856				857	863	857		1	1	1	1	1	1	1	1	1	1	1	1	1	1	1	1	1	1	1	1	1	1	1	1	1	1	1	1	1	1	1	1	1	1	1
argO		Arginine exporter protein ArgO	172	172	1	11	4214				617	617	617		1	1	1	1	1	1	1	1	1	1	1	1	1	1	1	1	1	1	1	1	1	1	1	1	1	1	1	1	1	1	1	1	1	1	1
group_5914		hypothetical protein	172	172	1	11	2812				302	302	302		1	1	1	1	1	1	1	1	1	1	1	1	1	1	1	1	1	1	1	1	1	1	1	1	1	1	1	1	1	1	1	1	1	1	1
wecC		UDP-N-acetyl-D-mannosamine dehydrogenase	172	172	1	11	4736				1262	1262	1262		1	1	1	1	1	1	1	1	1	1	1	1	1	1	1	1	1	1	1	1	1	1	1	1	1	1	1	1	1	1	1	1	1	1	1
recO		DNA repair protein RecO	172	172	1	11	3136				746	746	746		1	1	1	1	1	1	1	1	1	1	1	1	1	1	1	1	1	1	1	1	1	1	1	1	1	1	1	1	1	1	1	1	1	1	1
accB_2		Biotin carboxyl carrier protein of acetyl-CoA carboxylase	172	172	1	11	3096				449	449	449		1	1	1	1	1	1	1	1	1	1	1	1	1	1	1	1	1	1	1	1	1	1	1	1	1	1	1	1	1	1	1	1	1	1	1
group_5921		hypothetical protein	172	172	1	11	2690				395	395	395		1	1	1	1	1	1	1	1	1	1	1	1	1	1	1	1	1	1	1	1	1	1	1	1	1	1	1	1	1	1	1	1	1	1	1
group_5922		hypothetical protein	172	172	1	11	2708				1223	1223	1223		1	1	1	1	1	1	1	1	1	1	1	1	1	1	1	1	1	1	1	1	1	1	1	1	1	1	1	1	1	1	1	1	1	1	1
mrpC		Na(+)/H(+) antiporter subunit C	172	172	1	11	1238				344	344	344		1	1	1	1	1	1	1	1	1	1	1	1	1	1	1	1	1	1	1	1	1	1	1	1	1	1	1	1	1	1	1	1	1	1	1
pip		Proline iminopeptidase	172	172	1	11	1207				788	788	788		1	1	1	1	1	1	1	1	1	1	1	1	1	1	1	1	1	1	1	1	1	1	1	1	1	1	1	1	1	1	1	1	1	1	1
btuF		Vitamin B12-binding protein	172	172	1	11	1201				887	887	887		1	1	1	1	1	1	1	1	1	1	1	1	1	1	1	1	1	1	1	1	1	1	1	1	1	1	1	1	1	1	1	1	1	1	1
group_5929		hypothetical protein	172	172	1	11	2011				842	842	842		1	1	1	1	1	1	1	1	1	1	1	1	1	1	1	1	1	1	1	1	1	1	1	1	1	1	1	1	1	1	1	1	1	1	1
ribH		6,7-dimethyl-8-ribityllumazine synthase	172	172	1	11	2830				464	464	464		1	1	1	1	1	1	1	1	1	1	1	1	1	1	1	1	1	1	1	1	1	1	1	1	1	1	1	1	1	1	1	1	1	1	1
lgt		Phosphatidylglycerol--prolipoprotein diacylglyceryl transferase	172	172	1	11	1419				839	842	839		1	1	1	1	1	1	1	1	1	1	1	1	1	1	1	1	1	1	1	1	1	1	1	1	1	1	1	1	1	1	1	1	1	1	1
group_5933		hypothetical protein	172	172	1	11	1409				674	674	674		1	1	1	1	1	1	1	1	1	1	1	1	1	1	1	1	1	1	1	1	1	1	1	1	1	1	1	1	1	1	1	1	1	1	1
group_5934		putative amino-acid ABC transporter-binding protein	172	172	1	11	5694				779	779	779		1	1	1	1	1	1	1	1	1	1	1	1	1	1	1	1	1	1	1	1	1	1	1	1	1	1	1	1	1	1	1	1	1	1	1
group_5937		D-arabitol-phosphate dehydrogenase	172	172	1	11	4626				1055	1055	1055		1	1	1	1	1	1	1	1	1	1	1	1	1	1	1	1	1	1	1	1	1	1	1	1	1	1	1	1	1	1	1	1	1	1	1
est_2		Carboxylesterase	172	172	1	11	4341				734	734	734		1	1	1	1	1	1	1	1	1	1	1	1	1	1	1	1	1	1	1	1	1	1	1	1	1	1	1	1	1	1	1	1	1	1	1
group_5939		hypothetical protein	172	172	1	11	4742				1205	1205	1205		1	1	1	1	1	1	1	1	1	1	1	1	1	1	1	1	1	1	1	1	1	1	1	1	1	1	1	1	1	1	1	1	1	1	1
comEA		ComE operon protein 1	172	172	1	11	3112				677	677	677		1	1	1	1	1	1	1	1	1	1	1	1	1	1	1	1	1	1	1	1	1	1	1	1	1	1	1	1	1	1	1	1	1	1	1
tdk		Thymidine kinase	172	172	1	11	3828				599	599	599		1	1	1	1	1	1	1	1	1	1	1	1	1	1	1	1	1	1	1	1	1	1	1	1	1	1	1	1	1	1	1	1	1	1	1
sbnF		2-[(L-alanin-3-ylcarbamoyl)methyl]-3-(2-aminoethylcarbamoyl)-2-hydroxypropanoate synthase	172	172	1	11	4795				1778	1778	1778		1	1	1	1	1	1	1	1	1	1	1	1	1	1	1	1	1	1	1	1	1	1	1	1	1	1	1	1	1	1	1	1	1	1	1
truA		tRNA pseudouridine synthase A	172	172	1	11	95				794	803	802		1	1	1	1	1	1	1	1	1	1	1	1	1	1	1	1	1	1	1	1	1	1	1	1	1	1	1	1	1	1	1	1	1	1	1
yfmC_1		Fe(3+)-citrate-binding protein YfmC	172	172	1	11	49				983	983	983		1	1	1	1	1	1	1	1	1	1	1	1	1	1	1	1	1	1	1	1	1	1	1	1	1	1	1	1	1	1	1	1	1	1	1
group_5948		hypothetical protein	172	172	1	11	4343				362	362	362		1	1	1	1	1	1	1	1	1	1	1	1	1	1	1	1	1	1	1	1	1	1	1	1	1	1	1	1	1	1	1	1	1	1	1
yfhP		putative protein YfhP	172	172	1	11	1925				977	977	977		1	1	1	1	1	1	1	1	1	1	1	1	1	1	1	1	1	1	1	1	1	1	1	1	1	1	1	1	1	1	1	1	1	1	1
group_5953		hypothetical protein	172	172	1	11	5673				386	386	386		1	1	1	1	1	1	1	1	1	1	1	1	1	1	1	1	1	1	1	1	1	1	1	1	1	1	1	1	1	1	1	1	1	1	1
polX		DNA polymerase/3'-5' exonuclease PolX	172	172	1	11	3941				1712	1712	1712		1	1	1	1	1	1	1	1	1	1	1	1	1	1	1	1	1	1	1	1	1	1	1	1	1	1	1	1	1	1	1	1	1	1	1
opuBA		Choline transport ATP-binding protein OpuBA	172	172	1	11	1378				977	977	977		1	1	1	1	1	1	1	1	1	1	1	1	1	1	1	1	1	1	1	1	1	1	1	1	1	1	1	1	1	1	1	1	1	1	1
group_5958		Monoacylglycerol lipase	172	172	1	11	3488				914	917	916		1	1	1	1	1	1	1	1	1	1	1	1	1	1	1	1	1	1	1	1	1	1	1	1	1	1	1	1	1	1	1	1	1	1	1
acr1		putative oxidoreductase	172	172	1	11	3201				737	755	754		1	1	1	1	1	1	1	1	1	1	1	1	1	1	1	1	1	1	1	1	1	1	1	1	1	1	1	1	1	1	1	1	1	1	1
acuC		Acetoin utilization protein AcuC	172	172	1	11	2867				1169	1169	1169		1	1	1	1	1	1	1	1	1	1	1	1	1	1	1	1	1	1	1	1	1	1	1	1	1	1	1	1	1	1	1	1	1	1	1
group_5961		hypothetical protein	172	172	1	11	5653				599	599	599		1	1	1	1	1	1	1	1	1	1	1	1	1	1	1	1	1	1	1	1	1	1	1	1	1	1	1	1	1	1	1	1	1	1	1
rsmE		Ribosomal RNA small subunit methyltransferase E	172	172	1	11	3125				752	752	752		1	1	1	1	1	1	1	1	1	1	1	1	1	1	1	1	1	1	1	1	1	1	1	1	1	1	1	1	1	1	1	1	1	1	1
group_5966		hypothetical protein	172	172	1	11	3046				1067	1067	1067		1	1	1	1	1	1	1	1	1	1	1	1	1	1	1	1	1	1	1	1	1	1	1	1	1	1	1	1	1	1	1	1	1	1	1
isaA		putative transglycosylase IsaA	172	172	1	11	5106				701	701	701		1	1	1	1	1	1	1	1	1	1	1	1	1	1	1	1	1	1	1	1	1	1	1	1	1	1	1	1	1	1	1	1	1	1	1
scmP_4		N-acetylcysteine deacetylase	172	172	1	11	1022				1175	1175	1175		1	1	1	1	1	1	1	1	1	1	1	1	1	1	1	1	1	1	1	1	1	1	1	1	1	1	1	1	1	1	1	1	1	1	1
group_5970		2-dehydropantoate 2-reductase	172	172	1	11	5072				860	860	860		1	1	1	1	1	1	1	1	1	1	1	1	1	1	1	1	1	1	1	1	1	1	1	1	1	1	1	1	1	1	1	1	1	1	1
group_5971		hypothetical protein	172	172	1	11	1194				476	476	476		1	1	1	1	1	1	1	1	1	1	1	1	1	1	1	1	1	1	1	1	1	1	1	1	1	1	1	1	1	1	1	1	1	1	1
group_5976		hypothetical protein	172	177	1.03	11	1108				167	167	167		1	1	1	1	1	1	1	1	1	1	1	1	1	1	1	1	1	1	1	1	1	1	1	1	1	1	1	1	1	1	1	1	1	1	1
scpB		Segregation and condensation protein B	172	172	1	11	3209				542	542	542		1	1	1	1	1	1	1	1	1	1	1	1	1	1	1	1	1	1	1	1	1	1	1	1	1	1	1	1	1	1	1	1	1	1	1
group_5984		Putative esterase	172	172	1	11	4153				374	374	374		1	1	1	1	1	1	1	1	1	1	1	1	1	1	1	1	1	1	1	1	1	1	1	1	1	1	1	1	1	1	1	1	1	1	1
nasD		Nitrite reductase [NAD(P)H]	172	172	1	11	5713				2405	2405	2405		1	1	1	1	1	1	1	1	1	1	1	1	1	1	1	1	1	1	1	1	1	1	1	1	1	1	1	1	1	1	1	1	1	1	1
rpmF		50S ribosomal protein L32	172	172	1	11	3962				173	173	173		1	1	1	1	1	1	1	1	1	1	1	1	1	1	1	1	1	1	1	1	1	1	1	1	1	1	1	1	1	1	1	1	1	1	1
gtfA_1		UDP-N-acetylglucosamine--peptide N-acetylglucosaminyltransferase GtfA subunit	172	172	1	11	5012				1508	1508	1508		1	1	1	1	1	1	1	1	1	1	1	1	1	1	1	1	1	1	1	1	1	1	1	1	1	1	1	1	1	1	1	1	1	1	1
hisA		1-(5-phosphoribosyl)-5-[(5-phosphoribosylamino)methylideneamino] imidazole-4-carboxamide isomerase	172	172	1	11	4967				704	704	704		1	1	1	1	1	1	1	1	1	1	1	1	1	1	1	1	1	1	1	1	1	1	1	1	1	1	1	1	1	1	1	1	1	1	1
group_5991		hypothetical protein	172	172	1	11	3942				521	521	521		1	1	1	1	1	1	1	1	1	1	1	1	1	1	1	1	1	1	1	1	1	1	1	1	1	1	1	1	1	1	1	1	1	1	1
hisC_2		Histidinol-phosphate aminotransferase	172	172	1	11	1380				1058	1058	1058		1	1	1	1	1	1	1	1	1	1	1	1	1	1	1	1	1	1	1	1	1	1	1	1	1	1	1	1	1	1	1	1	1	1	1
cvfB		Conserved virulence factor B	172	172	1	11	3372				902	902	902		1	1	1	1	1	1	1	1	1	1	1	1	1	1	1	1	1	1	1	1	1	1	1	1	1	1	1	1	1	1	1	1	1	1	1
ponA		Penicillin-binding protein 1A/1B	172	172	1	11	3302				2150	2183	2179		1	1	1	1	1	1	1	1	1	1	1	1	1	1	1	1	1	1	1	1	1	1	1	1	1	1	1	1	1	1	1	1	1	1	1
yrrB		TPR repeat-containing protein YrrB	172	172	1	11	3083				668	668	668		1	1	1	1	1	1	1	1	1	1	1	1	1	1	1	1	1	1	1	1	1	1	1	1	1	1	1	1	1	1	1	1	1	1	1
group_6000		hypothetical protein	172	172	1	11	4219				188	188	188		1	1	1	1	1	1	1	1	1	1	1	1	1	1	1	1	1	1	1	1	1	1	1	1	1	1	1	1	1	1	1	1	1	1	1
prmA		Ribosomal protein L11 methyltransferase	172	172	1	11	3124				938	938	938		1	1	1	1	1	1	1	1	1	1	1	1	1	1	1	1	1	1	1	1	1	1	1	1	1	1	1	1	1	1	1	1	1	1	1
group_6005		hypothetical protein	172	172	1	11	2688				152	152	152		1	1	1	1	1	1	1	1	1	1	1	1	1	1	1	1	1	1	1	1	1	1	1	1	1	1	1	1	1	1	1	1	1	1	1
thiD		Hydroxymethylpyrimidine/phosphomethylpyrimidine kinase	172	172	1	11	3855				830	830	830		1	1	1	1	1	1	1	1	1	1	1	1	1	1	1	1	1	1	1	1	1	1	1	1	1	1	1	1	1	1	1	1	1	1	1
group_6007		Putative flavoprotein monooxygenase	172	172	1	11	5090				1106	1106	1106		1	1	1	1	1	1	1	1	1	1	1	1	1	1	1	1	1	1	1	1	1	1	1	1	1	1	1	1	1	1	1	1	1	1	1
pyrP		Uracil permease	172	172	1	11	3746				1307	1328	1310		1	1	1	1	1	1	1	1	1	1	1	1	1	1	1	1	1	1	1	1	1	1	1	1	1	1	1	1	1	1	1	1	1	1	1
yxdL		ABC transporter ATP-binding protein YxdL	172	172	1	11	5044				755	755	755		1	1	1	1	1	1	1	1	1	1	1	1	1	1	1	1	1	1	1	1	1	1	1	1	1	1	1	1	1	1	1	1	1	1	1
group_6010		hypothetical protein	172	172	1	11	156				1004	1004	1004		1	1	1	1	1	1	1	1	1	1	1	1	1	1	1	1	1	1	1	1	1	1	1	1	1	1	1	1	1	1	1	1	1	1	1
pnbA		Para-nitrobenzyl esterase	172	172	1	11	5651				1352	1352	1352		1	1	1	1	1	1	1	1	1	1	1	1	1	1	1	1	1	1	1	1	1	1	1	1	1	1	1	1	1	1	1	1	1	1	1
yqgN		putative protein YqgN	172	172	1	11	3152				593	593	593		1	1	1	1	1	1	1	1	1	1	1	1	1	1	1	1	1	1	1	1	1	1	1	1	1	1	1	1	1	1	1	1	1	1	1
mleN_2		Malate-2H(+)/Na(+)-lactate antiporter	172	172	1	11	5885				1397	1400	1397		1	1	1	1	1	1	1	1	1	1	1	1	1	1	1	1	1	1	1	1	1	1	1	1	1	1	1	1	1	1	1	1	1	1	1
rluB		Ribosomal large subunit pseudouridine synthase B	172	172	1	11	3210				737	737	737		1	1	1	1	1	1	1	1	1	1	1	1	1	1	1	1	1	1	1	1	1	1	1	1	1	1	1	1	1	1	1	1	1	1	1
group_605		putative HTH-type transcriptional regulator	172	172	1	11	145				368	440	437		1	1	1	1	1	1	1	1	1	1	1	1	1	1	1	1	1	1	1	1	1	1	1	1	1	1	1	1	1	1	1	1	1	1	1
group_607		hypothetical protein	172	172	1	11	143				251	251	251		1	1	1	1	1	1	1	1	1	1	1	1	1	1	1	1	1	1	1	1	1	1	1	1	1	1	1	1	1	1	1	1	1	1	1
adhR		HTH-type transcriptional regulator AdhR	172	172	1	11	75				416	416	416		1	1	1	1	1	1	1	1	1	1	1	1	1	1	1	1	1	1	1	1	1	1	1	1	1	1	1	1	1	1	1	1	1	1	1
group_614		putative lipoprotein	172	172	1	11	5810				614	629	618		1	1	1	1	1	1	1	1	1	1	1	1	1	1	1	1	1	1	1	1	1	1	1	1	1	1	1	1	1	1	1	1	1	1	1
paiA		Spermidine/spermine N(1)-acetyltransferase	172	172	1	11	5809				515	515	515		1	1	1	1	1	1	1	1	1	1	1	1	1	1	1	1	1	1	1	1	1	1	1	1	1	1	1	1	1	1	1	1	1	1	1
group_618		hypothetical protein	172	172	1	11	5797				383	383	383		1	1	1	1	1	1	1	1	1	1	1	1	1	1	1	1	1	1	1	1	1	1	1	1	1	1	1	1	1	1	1	1	1	1	1
group_62		hypothetical protein	172	179	1.05	11	3792				122	7448	7003		1	1	1	1	1	1	1	1	1	1	1	1	1	1	1	1	1	1	1	1	1	1	1	1	1	1	1	1	1	1	1	1	1	1	1
group_620		hypothetical protein	172	172	1	11	5794				233	356	354		1	1	1	1	1	1	1	1	1	1	1	1	1	1	1	1	1	1	1	1	1	1	1	1	1	1	1	1	1	1	1	1	1	1	1
ytmI		putative N-acetyltransferase YtmI	172	172	1	11	5710				536	536	536		1	1	1	1	1	1	1	1	1	1	1	1	1	1	1	1	1	1	1	1	1	1	1	1	1	1	1	1	1	1	1	1	1	1	1
hlgC		Gamma-hemolysin component C	172	172	1	11	5684				917	947	946		1	1	1	1	1	1	1	1	1	1	1	1	1	1	1	1	1	1	1	1	1	1	1	1	1	1	1	1	1	1	1	1	1	1	1
group_632		putative oxidoreductase	172	172	1	11	5619				695	695	695		1	1	1	1	1	1	1	1	1	1	1	1	1	1	1	1	1	1	1	1	1	1	1	1	1	1	1	1	1	1	1	1	1	1	1
group_635		hypothetical protein	172	172	1	11	3290				455	617	589		1	1	1	1	1	1	1	1	1	1	1	1	1	1	1	1	1	1	1	1	1	1	1	1	1	1	1	1	1	1	1	1	1	1	1
group_650		hypothetical protein	172	172	1	11	3765				479	479	479		1	1	1	1	1	1	1	1	1	1	1	1	1	1	1	1	1	1	1	1	1	1	1	1	1	1	1	1	1	1	1	1	1	1	1
kdpC		Potassium-transporting ATPase KdpC subunit	172	172	1	11	3766				560	560	560		1	1	1	1	1	1	1	1	1	1	1	1	1	1	1	1	1	1	1	1	1	1	1	1	1	1	1	1	1	1	1	1	1	1	1
group_652		hypothetical protein	172	172	1	11	3815				635	1193	1176		1	1	1	1	1	1	1	1	1	1	1	1	1	1	1	1	1	1	1	1	1	1	1	1	1	1	1	1	1	1	1	1	1	1	1
isdH		Iron-regulated surface determinant protein H	172	172	1	11	2871				836	2687	2472		1	1	1	1	1	1	1	1	1	1	1	1	1	1	1	1	1	1	1	1	1	1	1	1	1	1	1	1	1	1	1	1	1	1	1
acuA		Acetoin utilization protein AcuA	172	172	1	11	2868				632	632	632		1	1	1	1	1	1	1	1	1	1	1	1	1	1	1	1	1	1	1	1	1	1	1	1	1	1	1	1	1	1	1	1	1	1	1
mutS_2		DNA mismatch repair protein MutS	172	172	1	11	1465				1052	1610	1606		1	1	1	1	1	1	1	1	1	1	1	1	1	1	1	1	1	1	1	1	1	1	1	1	1	1	1	1	1	1	1	1	1	1	1
yfiZ_2		putative siderophore transport system permease protein YfiZ	172	172	1	11	48				917	1031	1030		1	1	1	1	1	1	1	1	1	1	1	1	1	1	1	1	1	1	1	1	1	1	1	1	1	1	1	1	1	1	1	1	1	1	1
group_685		hypothetical protein	172	172	1	11	2794				995	995	995		1	1	1	1	1	1	1	1	1	1	1	1	1	1	1	1	1	1	1	1	1	1	1	1	1	1	1	1	1	1	1	1	1	1	1
menE_1		2-succinylbenzoate--CoA ligase	172	172	1	11	2799				1478	1478	1478		1	1	1	1	1	1	1	1	1	1	1	1	1	1	1	1	1	1	1	1	1	1	1	1	1	1	1	1	1	1	1	1	1	1	1
menC		o-succinylbenzoate synthase	172	172	1	11	2800				1001	1001	1001		1	1	1	1	1	1	1	1	1	1	1	1	1	1	1	1	1	1	1	1	1	1	1	1	1	1	1	1	1	1	1	1	1	1	1
arsB		Arsenical pump membrane protein	172	172	1	11	2823				1292	1292	1292		1	1	1	1	1	1	1	1	1	1	1	1	1	1	1	1	1	1	1	1	1	1	1	1	1	1	1	1	1	1	1	1	1	1	1
group_692		hypothetical protein	172	172	1	11	2824				314	314	314		1	1	1	1	1	1	1	1	1	1	1	1	1	1	1	1	1	1	1	1	1	1	1	1	1	1	1	1	1	1	1	1	1	1	1
group_719		hypothetical protein	172	172	1	11	5888				743	752	743		1	1	1	1	1	1	1	1	1	1	1	1	1	1	1	1	1	1	1	1	1	1	1	1	1	1	1	1	1	1	1	1	1	1	1
gph		Phosphoglycolate phosphatase	172	177	1.03	11	1078				647	647	647		1	1	1	1	1	1	1	1	1	1	1	1	1	1	1	1	1	1	1	1	1	1	1	1	1	1	1	1	1	1	1	1	1	1	1
group_760		hypothetical protein	172	177	1.03	11	1090				365	365	365		1	1	1	1	1	1	1	1	1	1	1	1	1	1	1	1	1	1	1	1	1	1	1	1	1	1	1	1	1	1	1	1	1	1	1
tagX		Putative glycosyltransferase TagX	172	172	1	11	1256				1061	1061	1061		1	1	1	1	1	1	1	1	1	1	1	1	1	1	1	1	1	1	1	1	1	1	1	1	1	1	1	1	1	1	1	1	1	1	1
group_777		hypothetical protein	172	172	1	11	1258				1070	1295	1292		1	1	1	1	1	1	1	1	1	1	1	1	1	1	1	1	1	1	1	1	1	1	1	1	1	1	1	1	1	1	1	1	1	1	1
fepC		Ferric enterobactin transport ATP-binding protein FepC	172	172	1	11	1263				428	797	794		1	1	1	1	1	1	1	1	1	1	1	1	1	1	1	1	1	1	1	1	1	1	1	1	1	1	1	1	1	1	1	1	1	1	1
group_786		hypothetical protein	172	172	1	11	1348				422	422	422		1	1	1	1	1	1	1	1	1	1	1	1	1	1	1	1	1	1	1	1	1	1	1	1	1	1	1	1	1	1	1	1	1	1	1
group_790		hypothetical protein	172	172	1	11	1365				440	440	440		1	1	1	1	1	1	1	1	1	1	1	1	1	1	1	1	1	1	1	1	1	1	1	1	1	1	1	1	1	1	1	1	1	1	1
yclN		Petrobactin import system permease protein YclN	172	172	1	11	1391				971	1013	998		1	1	1	1	1	1	1	1	1	1	1	1	1	1	1	1	1	1	1	1	1	1	1	1	1	1	1	1	1	1	1	1	1	1	1
yclP		Petrobactin import ATP-binding protein YclP	172	172	1	11	1393				761	761	761		1	1	1	1	1	1	1	1	1	1	1	1	1	1	1	1	1	1	1	1	1	1	1	1	1	1	1	1	1	1	1	1	1	1	1
pepT_2		Peptidase T	172	172	1	11	1401				1001	1226	1201		1	1	1	1	1	1	1	1	1	1	1	1	1	1	1	1	1	1	1	1	1	1	1	1	1	1	1	1	1	1	1	1	1	1	1
comFA		ComF operon protein 1	172	172	1	11	1408				1082	1082	1082		1	1	1	1	1	1	1	1	1	1	1	1	1	1	1	1	1	1	1	1	1	1	1	1	1	1	1	1	1	1	1	1	1	1	1
group_800		Epimerase family protein	172	172	1	11	1427				869	902	876		1	1	1	1	1	1	1	1	1	1	1	1	1	1	1	1	1	1	1	1	1	1	1	1	1	1	1	1	1	1	1	1	1	1	1
est_1		Carboxylesterase	172	172	1	11	1438				740	740	740		1	1	1	1	1	1	1	1	1	1	1	1	1	1	1	1	1	1	1	1	1	1	1	1	1	1	1	1	1	1	1	1	1	1	1
group_803		hypothetical protein	172	172	1	11	4222				218	218	218		1	1	1	1	1	1	1	1	1	1	1	1	1	1	1	1	1	1	1	1	1	1	1	1	1	1	1	1	1	1	1	1	1	1	1
group_806		hypothetical protein	172	172	1	11	4174				1319	1319	1319		1	1	1	1	1	1	1	1	1	1	1	1	1	1	1	1	1	1	1	1	1	1	1	1	1	1	1	1	1	1	1	1	1	1	1
group_809		hypothetical protein	172	172	1	11	4170				434	434	434		1	1	1	1	1	1	1	1	1	1	1	1	1	1	1	1	1	1	1	1	1	1	1	1	1	1	1	1	1	1	1	1	1	1	1
ghrB_1		Glyoxylate/hydroxypyruvate reductase B	172	172	1	11	4168				500	959	956		1	1	1	1	1	1	1	1	1	1	1	1	1	1	1	1	1	1	1	1	1	1	1	1	1	1	1	1	1	1	1	1	1	1	1
group_812		hypothetical protein	172	172	1	11	4127				389	389	389		1	1	1	1	1	1	1	1	1	1	1	1	1	1	1	1	1	1	1	1	1	1	1	1	1	1	1	1	1	1	1	1	1	1	1
group_819		hypothetical protein	172	172	1	11	4078				758	758	758		1	1	1	1	1	1	1	1	1	1	1	1	1	1	1	1	1	1	1	1	1	1	1	1	1	1	1	1	1	1	1	1	1	1	1
group_823		hypothetical protein	172	172	1	11	4054				116	116	116		1	1	1	1	1	1	1	1	1	1	1	1	1	1	1	1	1	1	1	1	1	1	1	1	1	1	1	1	1	1	1	1	1	1	1
group_824		Acetyltransferase	172	172	1	11	4037				428	434	433		1	1	1	1	1	1	1	1	1	1	1	1	1	1	1	1	1	1	1	1	1	1	1	1	1	1	1	1	1	1	1	1	1	1	1
tagU_2		Polyisoprenyl-teichoic acid--peptidoglycan teichoic acid transferase TagU	172	172	1	11	4035				1217	1226	1219		1	1	1	1	1	1	1	1	1	1	1	1	1	1	1	1	1	1	1	1	1	1	1	1	1	1	1	1	1	1	1	1	1	1	1
qoxC		Quinol oxidase subunit 3	172	172	1	11	4032				605	2576	627		1	1	1	1	1	1	1	1	1	1	1	1	1	1	1	1	1	1	1	1	1	1	1	1	1	1	1	1	1	1	1	1	1	1	1
group_830		hypothetical protein	172	172	1	11	3992				275	275	275		1	1	1	1	1	1	1	1	1	1	1	1	1	1	1	1	1	1	1	1	1	1	1	1	1	1	1	1	1	1	1	1	1	1	1
group_831		hypothetical protein	172	172	1	11	3985				419	419	419		1	1	1	1	1	1	1	1	1	1	1	1	1	1	1	1	1	1	1	1	1	1	1	1	1	1	1	1	1	1	1	1	1	1	1
group_832		hypothetical protein	172	172	1	11	3969				926	929	926		1	1	1	1	1	1	1	1	1	1	1	1	1	1	1	1	1	1	1	1	1	1	1	1	1	1	1	1	1	1	1	1	1	1	1
rnhC		Ribonuclease HIII	172	172	1	11	3944				938	989	943		1	1	1	1	1	1	1	1	1	1	1	1	1	1	1	1	1	1	1	1	1	1	1	1	1	1	1	1	1	1	1	1	1	1	1
group_846		hypothetical protein	172	172	1	11	3889				188	197	188		1	1	1	1	1	1	1	1	1	1	1	1	1	1	1	1	1	1	1	1	1	1	1	1	1	1	1	1	1	1	1	1	1	1	1
group_847		hypothetical protein	172	172	1	11	3871				290	290	290		1	1	1	1	1	1	1	1	1	1	1	1	1	1	1	1	1	1	1	1	1	1	1	1	1	1	1	1	1	1	1	1	1	1	1
group_848		hypothetical protein	172	172	1	11	3870				656	806	802		1	1	1	1	1	1	1	1	1	1	1	1	1	1	1	1	1	1	1	1	1	1	1	1	1	1	1	1	1	1	1	1	1	1	1
group_851		hypothetical protein	172	172	1	11	3739				212	212	212		1	1	1	1	1	1	1	1	1	1	1	1	1	1	1	1	1	1	1	1	1	1	1	1	1	1	1	1	1	1	1	1	1	1	1
group_852		hypothetical protein	172	172	1	11	3729				203	302	273		1	1	1	1	1	1	1	1	1	1	1	1	1	1	1	1	1	1	1	1	1	1	1	1	1	1	1	1	1	1	1	1	1	1	1
group_855		Putative zinc metalloprotease	172	172	1	11	3679				821	1286	1283		1	1	1	1	1	1	1	1	1	1	1	1	1	1	1	1	1	1	1	1	1	1	1	1	1	1	1	1	1	1	1	1	1	1	1
rnj2		Ribonuclease J 2	172	172	1	11	3666				767	1724	1668		1	1	1	1	1	1	1	1	1	1	1	1	1	1	1	1	1	1	1	1	1	1	1	1	1	1	1	1	1	1	1	1	1	1	1
hfq		RNA-binding protein Hfq	172	172	1	11	3486				233	233	233		1	1	1	1	1	1	1	1	1	1	1	1	1	1	1	1	1	1	1	1	1	1	1	1	1	1	1	1	1	1	1	1	1	1	1
cls_1		Cardiolipin synthase	172	172	1	11	3450				1481	1517	1506		1	1	1	1	1	1	1	1	1	1	1	1	1	1	1	1	1	1	1	1	1	1	1	1	1	1	1	1	1	1	1	1	1	1	1
trpC		Indole-3-glycerol phosphate synthase	172	172	1	11	3393				782	782	782		1	1	1	1	1	1	1	1	1	1	1	1	1	1	1	1	1	1	1	1	1	1	1	1	1	1	1	1	1	1	1	1	1	1	1
group_880		hypothetical protein	172	172	1	11	3380				290	344	343		1	1	1	1	1	1	1	1	1	1	1	1	1	1	1	1	1	1	1	1	1	1	1	1	1	1	1	1	1	1	1	1	1	1	1
dapA		4-hydroxy-tetrahydrodipicolinate synthase	172	172	1	11	3368				887	887	887		1	1	1	1	1	1	1	1	1	1	1	1	1	1	1	1	1	1	1	1	1	1	1	1	1	1	1	1	1	1	1	1	1	1	1
rhaS_1		HTH-type transcriptional activator RhaS	172	172	1	11	4816				2237	2237	2237		1	1	1	1	1	1	1	1	1	1	1	1	1	1	1	1	1	1	1	1	1	1	1	1	1	1	1	1	1	1	1	1	1	1	1
group_901		Oleate hydratase	172	172	1	11	4811				1775	1775	1775		1	1	1	1	1	1	1	1	1	1	1	1	1	1	1	1	1	1	1	1	1	1	1	1	1	1	1	1	1	1	1	1	1	1	1
sbnC		Staphyloferrin B synthase	172	172	1	11	4799				1754	1754	1754		1	1	1	1	1	1	1	1	1	1	1	1	1	1	1	1	1	1	1	1	1	1	1	1	1	1	1	1	1	1	1	1	1	1	1
ywqD_1		Tyrosine-protein kinase YwqD	172	172	1	11	4753				686	686	686		1	1	1	1	1	1	1	1	1	1	1	1	1	1	1	1	1	1	1	1	1	1	1	1	1	1	1	1	1	1	1	1	1	1	1
rocD2_1		Ornithine aminotransferase 2	172	172	1	11	4697				1184	1184	1184		1	1	1	1	1	1	1	1	1	1	1	1	1	1	1	1	1	1	1	1	1	1	1	1	1	1	1	1	1	1	1	1	1	1	1
group_919		PTS system EIIBC component	172	172	1	11	4686				860	1454	1450		1	1	1	1	1	1	1	1	1	1	1	1	1	1	1	1	1	1	1	1	1	1	1	1	1	1	1	1	1	1	1	1	1	1	1
scn_1		Staphylococcal complement inhibitor	172	172	1	11	4649				344	344	344		1	1	1	1	1	1	1	1	1	1	1	1	1	1	1	1	1	1	1	1	1	1	1	1	1	1	1	1	1	1	1	1	1	1	1
nikA		Nickel-binding protein NikA	172	172	1	11	4638				794	1475	1471		1	1	1	1	1	1	1	1	1	1	1	1	1	1	1	1	1	1	1	1	1	1	1	1	1	1	1	1	1	1	1	1	1	1	1
scdA		Iron-sulfur cluster repair protein ScdA	172	172	1	11	4615				674	674	674		1	1	1	1	1	1	1	1	1	1	1	1	1	1	1	1	1	1	1	1	1	1	1	1	1	1	1	1	1	1	1	1	1	1	1
group_930		hypothetical protein	172	172	1	11	4592				641	920	916		1	1	1	1	1	1	1	1	1	1	1	1	1	1	1	1	1	1	1	1	1	1	1	1	1	1	1	1	1	1	1	1	1	1	1
group_936		hypothetical protein	172	172	1	11	4535				398	398	398		1	1	1	1	1	1	1	1	1	1	1	1	1	1	1	1	1	1	1	1	1	1	1	1	1	1	1	1	1	1	1	1	1	1	1
group_942		putative oxidoreductase	172	172	1	11	4500				1199	1214	1202		1	1	1	1	1	1	1	1	1	1	1	1	1	1	1	1	1	1	1	1	1	1	1	1	1	1	1	1	1	1	1	1	1	1	1
group_943		hypothetical protein	172	172	1	11	4499				1001	1067	1001		1	1	1	1	1	1	1	1	1	1	1	1	1	1	1	1	1	1	1	1	1	1	1	1	1	1	1	1	1	1	1	1	1	1	1
group_945		hypothetical protein	172	172	1	11	4491				284	284	284		1	1	1	1	1	1	1	1	1	1	1	1	1	1	1	1	1	1	1	1	1	1	1	1	1	1	1	1	1	1	1	1	1	1	1
ydaF		Putative ribosomal N-acetyltransferase YdaF	172	172	1	11	4478				545	545	545		1	1	1	1	1	1	1	1	1	1	1	1	1	1	1	1	1	1	1	1	1	1	1	1	1	1	1	1	1	1	1	1	1	1	1
efeN		putative deferrochelatase/peroxidase EfeN	172	172	1	11	4476				875	1229	1226		1	1	1	1	1	1	1	1	1	1	1	1	1	1	1	1	1	1	1	1	1	1	1	1	1	1	1	1	1	1	1	1	1	1	1
mscS		Small-conductance mechanosensitive channel	172	172	1	11	4458				881	881	881		1	1	1	1	1	1	1	1	1	1	1	1	1	1	1	1	1	1	1	1	1	1	1	1	1	1	1	1	1	1	1	1	1	1	1
group_960		putative protein	172	172	1	11	4431				956	956	956		1	1	1	1	1	1	1	1	1	1	1	1	1	1	1	1	1	1	1	1	1	1	1	1	1	1	1	1	1	1	1	1	1	1	1
group_961		hypothetical protein	172	172	1	11	4429				407	440	414		1	1	1	1	1	1	1	1	1	1	1	1	1	1	1	1	1	1	1	1	1	1	1	1	1	1	1	1	1	1	1	1	1	1	1
xylB		Xylulose kinase	172	172	1	11	5181				1553	1553	1553		1	1	1	1	1	1	1	1	1	1	1	1	1	1	1	1	1	1	1	1	1	1	1	1	1	1	1	1	1	1	1	1	1	1	1
group_971		hypothetical protein	172	172	1	11	5179				731	764	760		1	1	1	1	1	1	1	1	1	1	1	1	1	1	1	1	1	1	1	1	1	1	1	1	1	1	1	1	1	1	1	1	1	1	1
group_973		hypothetical protein	172	172	1	11	5177				329	416	415		1	1	1	1	1	1	1	1	1	1	1	1	1	1	1	1	1	1	1	1	1	1	1	1	1	1	1	1	1	1	1	1	1	1	1
ybiV		Sugar phosphatase YbiV	172	172	1	11	5158				800	803	800		1	1	1	1	1	1	1	1	1	1	1	1	1	1	1	1	1	1	1	1	1	1	1	1	1	1	1	1	1	1	1	1	1	1	1
group_977		hypothetical protein	172	172	1	11	5146				344	356	353		1	1	1	1	1	1	1	1	1	1	1	1	1	1	1	1	1	1	1	1	1	1	1	1	1	1	1	1	1	1	1	1	1	1	1
mvaA		3-hydroxy-3-methylglutaryl-coenzyme A reductase	172	172	1	11	5136				1277	1280	1277		1	1	1	1	1	1	1	1	1	1	1	1	1	1	1	1	1	1	1	1	1	1	1	1	1	1	1	1	1	1	1	1	1	1	1
ogt		Methylated-DNA--protein-cysteine methyltransferase	172	172	1	11	5133				521	521	521		1	1	1	1	1	1	1	1	1	1	1	1	1	1	1	1	1	1	1	1	1	1	1	1	1	1	1	1	1	1	1	1	1	1	1
group_980		Putative acetyltransferase	172	172	1	11	5122				599	599	599		1	1	1	1	1	1	1	1	1	1	1	1	1	1	1	1	1	1	1	1	1	1	1	1	1	1	1	1	1	1	1	1	1	1	1
copZ		Copper chaperone CopZ	172	172	1	11	5119				206	206	206		1	1	1	1	1	1	1	1	1	1	1	1	1	1	1	1	1	1	1	1	1	1	1	1	1	1	1	1	1	1	1	1	1	1	1
crtN		4,4'-diapophytoene desaturase (4,4'-diaponeurosporene-forming)	172	172	1	11	5115				1490	1508	1507		1	1	1	1	1	1	1	1	1	1	1	1	1	1	1	1	1	1	1	1	1	1	1	1	1	1	1	1	1	1	1	1	1	1	1
crtQ		4,4'-diaponeurosporenoate glycosyltransferase	172	172	1	11	5113				1127	1127	1127		1	1	1	1	1	1	1	1	1	1	1	1	1	1	1	1	1	1	1	1	1	1	1	1	1	1	1	1	1	1	1	1	1	1	1
group_984		hypothetical protein	172	172	1	11	5111				242	497	495		1	1	1	1	1	1	1	1	1	1	1	1	1	1	1	1	1	1	1	1	1	1	1	1	1	1	1	1	1	1	1	1	1	1	1
group_988		hypothetical protein	172	172	1	11	5099				299	299	299		1	1	1	1	1	1	1	1	1	1	1	1	1	1	1	1	1	1	1	1	1	1	1	1	1	1	1	1	1	1	1	1	1	1	1
group_990		hypothetical protein	172	172	1	11	5092				890	890	890		1	1	1	1	1	1	1	1	1	1	1	1	1	1	1	1	1	1	1	1	1	1	1	1	1	1	1	1	1	1	1	1	1	1	1
group_991		hypothetical protein	172	172	1	11	5087				221	278	260		1	1	1	1	1	1	1	1	1	1	1	1	1	1	1	1	1	1	1	1	1	1	1	1	1	1	1	1	1	1	1	1	1	1	1
group_992		hypothetical protein	172	172	1	11	5084				275	275	275		1	1	1	1	1	1	1	1	1	1	1	1	1	1	1	1	1	1	1	1	1	1	1	1	1	1	1	1	1	1	1	1	1	1	1
group_995		hypothetical protein	172	172	1	11	5067				416	416	416		1	1	1	1	1	1	1	1	1	1	1	1	1	1	1	1	1	1	1	1	1	1	1	1	1	1	1	1	1	1	1	1	1	1	1
fda		Fructose-bisphosphate aldolase class 1	172	172	1	11	5066				866	890	889		1	1	1	1	1	1	1	1	1	1	1	1	1	1	1	1	1	1	1	1	1	1	1	1	1	1	1	1	1	1	1	1	1	1	1
isdG_1		Heme oxygenase (staphylobilin-producing)	172	172	1	11	5061				443	443	443		1	1	1	1	1	1	1	1	1	1	1	1	1	1	1	1	1	1	1	1	1	1	1	1	1	1	1	1	1	1	1	1	1	1	1
group_999		hypothetical protein	172	172	1	11	5041				200	200	200		1	1	1	1	1	1	1	1	1	1	1	1	1	1	1	1	1	1	1	1	1	1	1	1	1	1	1	1	1	1	1	1	1	1	1
panS		Pantothenate precursors transporter PanS	171	171	1	11	5863				536	917	874		1	1	1	1	1	1	1	1	1	1	1	1	1	1	1	1	1	1	1	1	1	1	1	1	1	1	1	1	1	1	1	1	1	1	1
topB		DNA topoisomerase 3	171	171	1	11	134				1400	2135	2113		1	1	1	0	1	1	1	1	1	1	1	1	1	1	1	1	1	1	1	1	1	1	1	1	1	1	1	1	1	1	1	1	1	1	1
nudG		CTP pyrophosphohydrolase	171	171	1	11	5242				392	392	392		1	1	1	0	1	1	1	1	1	1	1	1	1	1	1	1	1	1	1	1	1	1	1	1	1	1	1	1	1	1	1	1	1	1	1
bepA		Beta-barrel assembly-enhancing protease	171	171	1	11	3289				302	1244	1233		1	1	1	1	1	1	1	1	1	1	1	1	1	1	1	1	1	1	1	1	1	1	1	1	1	1	1	1	1	1	1	1	1	1	1
gmuF		putative mannose-6-phosphate isomerase GmuF	171	171	1	11	3804				269	938	934		1	1	1	1	1	1	1	1	1	1	1	1	1	1	1	1	1	1	1	1	1	1	1	1	1	1	1	1	1	1	1	1	1	1	1
group_1172		hypothetical protein	171	171	1	11	1970				671	986	983		1	1	1	1	1	1	1	1	1	1	1	1	1	1	1	1	1	1	1	1	1	1	1	1	1	1	1	1	1	1	1	1	1	1	1
sdcS		Sodium-dependent dicarboxylate transporter SdcS	171	171	1	11	2001				1298	1562	1484		1	1	1	1	1	1	1	1	1	1	1	1	1	1	1	1	1	1	1	1	1	1	1	1	1	1	1	1	1	1	1	1	1	1	1
group_1198		hypothetical protein	171	171	1	11	2014				446	563	550		1	1	1	1	1	1	1	1	1	1	1	1	1	1	1	1	1	1	1	1	1	1	1	1	1	1	1	1	1	1	1	1	1	1	1
arlR		Response regulator ArlR	171	171	1	11	3343				302	659	653		1	1	1	1	1	1	1	1	1	1	1	1	1	1	1	1	1	1	1	0	1	1	1	1	1	1	1	1	1	1	1	1	1	1	1
mrpB		Na(+)/H(+) antiporter subunit B	171	171	1	11	1237				425	425	425		1	1	1	1	1	1	1	1	1	1	1	1	1	1	1	1	1	1	1	1	1	1	1	1	1	1	1	1	1	1	1	1	1	1	1
group_1391		Acetyltransferase	171	171	1	11	1332				542	542	542		1	1	1	1	1	1	1	1	1	1	1	1	1	1	1	1	1	1	1	1	1	1	1	1	1	1	1	1	1	1	0	1	1	1	1
uppP		Undecaprenyl-diphosphatase	171	171	1	11	1336				875	899	875		1	1	1	1	1	1	1	1	1	1	1	1	1	1	1	1	1	1	1	1	1	1	1	1	1	1	1	1	1	1	0	1	1	1	1
dppE		Dipeptide-binding protein DppE	171	171	1	11	4103				1655	1655	1655		1	1	1	0	1	1	1	1	1	1	1	1	1	1	1	1	1	1	1	1	1	1	1	1	1	1	1	1	1	1	1	1	1	1	1
oppD_1		Oligopeptide transport ATP-binding protein OppD	171	171	1	11	4101				641	986	983		1	1	1	0	1	1	1	1	1	1	1	1	1	1	1	1	1	1	1	1	1	1	1	1	1	1	1	1	1	1	1	1	1	1	1
gsiC		Glutathione transport system permease protein GsiC	171	171	1	11	4098				650	962	927		1	1	1	0	1	1	1	1	1	1	1	1	1	1	1	1	1	1	1	1	1	1	1	1	1	1	1	1	1	1	1	1	1	1	1
group_1483		hypothetical protein	171	171	1	11	3440				410	854	851		1	1	1	1	1	1	1	1	1	1	1	1	1	1	1	1	1	1	1	1	1	1	1	1	1	1	1	1	1	1	1	1	1	1	1
group_1497		Putative transport protein	171	171	1	11	3406				1148	1208	1155		1	1	1	1	1	1	1	1	1	1	1	1	1	1	1	1	1	1	1	1	1	1	1	1	1	1	1	1	1	1	1	1	1	1	1
trpE		Anthranilate synthase component 1	171	171	1	11	3396				1406	1406	1406		1	1	1	1	1	1	1	1	1	1	1	1	1	1	1	1	1	1	1	1	1	1	1	1	1	1	1	1	1	1	1	1	1	1	1
group_185		hypothetical protein	171	171	1	11	3100				821	1220	1160		1	1	1	0	1	1	1	1	1	1	1	1	1	1	1	1	1	1	1	1	1	1	1	1	1	1	1	1	1	1	1	1	1	1	1
odhB		Dihydrolipoyllysine-residue succinyltransferase component of 2-oxoglutarate dehydrogenase complex	171	171	1	11	3348				1268	1271	1268		1	1	1	1	1	1	1	1	1	1	1	1	1	1	1	1	1	1	1	0	1	1	1	1	1	1	1	1	1	1	1	1	1	1	1
group_215		putative oxidoreductase	171	171	1	11	4141				257	1127	1061		1	1	1	1	1	1	1	1	0	1	1	1	1	1	1	1	1	1	1	1	1	1	1	1	1	1	1	1	1	1	1	1	1	1	1
dppC		Dipeptide transport system permease protein DppC	171	171	1	11	4097				881	881	881		1	1	1	0	1	1	1	1	1	1	1	1	1	1	1	1	1	1	1	1	1	1	1	1	1	1	1	1	1	1	1	1	1	1	1
sspC		Staphostatin B	171	171	1	11	4046				329	329	329		1	1	1	1	1	1	1	1	1	1	1	1	1	1	1	1	1	1	1	1	1	1	1	1	1	1	1	1	1	1	1	1	1	1	1
rluD_1		Ribosomal large subunit pseudouridine synthase D	171	171	1	11	3748				917	917	917		1	1	1	1	1	1	1	1	1	1	1	1	1	1	1	1	1	1	1	1	1	1	1	1	1	1	1	1	1	1	1	1	1	1	1
group_2273		hypothetical protein	171	171	1	11	4662				1268	1268	1268		1	1	1	1	1	1	1	1	1	1	1	1	1	1	1	1	1	1	1	1	1	1	1	1	1	1	1	1	1	1	1	1	1	1	1
tarS		Poly(ribitol-phosphate) beta-N-acetylglucosaminyltransferase TarS	171	171	1	11	4616				851	1724	1709		1	1	1	1	1	1	1	1	1	1	1	1	1	1	1	1	1	1	1	1	1	1	1	1	1	1	0	1	1	1	1	1	1	1	1
group_2291		Isatin hydrolase	171	171	1	11	4464				752	752	752		1	1	1	1	1	1	1	1	1	1	1	1	1	1	1	1	1	1	1	1	1	1	1	1	1	1	1	1	1	1	1	1	1	1	1
ywqD_2		Tyrosine-protein kinase YwqD	171	171	1	11	4983				692	692	692		1	1	1	1	1	1	1	1	1	1	1	1	1	1	1	1	1	1	1	1	1	1	1	1	1	1	1	1	1	1	1	1	1	1	1
nth_1		Endonuclease III	171	171	1	11	3300				659	659	659		1	1	1	1	1	1	1	1	1	1	1	1	1	1	1	1	1	1	1	1	1	1	1	1	1	1	1	1	1	1	1	1	1	1	1
icaA		Poly-beta-1,6-N-acetyl-D-glucosamine synthase	171	171	1	11	4980				572	1238	1226		1	1	1	1	1	1	1	1	1	1	1	1	1	1	1	1	1	1	1	1	1	1	1	1	1	1	1	1	1	1	1	1	1	1	1
deoC2		Deoxyribose-phosphate aldolase 2	171	171	1	11	3810				662	662	662		1	1	1	1	1	1	1	1	1	1	1	1	1	1	1	1	1	1	1	1	1	1	1	1	1	1	1	1	1	1	1	1	1	1	1
group_2413		hypothetical protein	171	171	1	11	2682				1061	1061	1061		1	1	1	1	1	1	1	1	1	1	1	1	1	1	1	1	1	1	1	1	1	1	1	1	1	1	1	1	1	1	1	1	1	1	1
mltF		Membrane-bound lytic murein transglycosylase F	171	171	1	11	2683				1457	1457	1457		1	1	1	1	1	1	1	1	1	1	1	1	1	1	1	1	1	1	1	1	1	1	1	1	1	1	1	1	1	1	1	1	1	1	1
tcyC_2		L-cystine import ATP-binding protein TcyC	171	171	1	11	2684				728	728	728		1	1	1	1	1	1	1	1	1	1	1	1	1	1	1	1	1	1	1	1	1	1	1	1	1	1	1	1	1	1	1	1	1	1	1
queG		Epoxyqueuosine reductase	171	171	1	11	2685				1127	1127	1127		1	1	1	1	1	1	1	1	1	1	1	1	1	1	1	1	1	1	1	1	1	1	1	1	1	1	1	1	1	1	1	1	1	1	1
trmL		tRNA (cytidine(34)-2'-O)-methyltransferase	171	171	1	11	2686				470	470	470		1	1	1	1	1	1	1	1	1	1	1	1	1	1	1	1	1	1	1	1	1	1	1	1	1	1	1	1	1	1	1	1	1	1	1
group_2510		hypothetical protein	171	171	1	11	2820				224	224	224		1	1	1	1	1	1	1	1	1	1	1	1	1	1	1	1	1	1	1	1	1	1	1	1	1	1	1	1	1	1	1	1	1	1	1
group_331		hypothetical protein	171	171	1	11	4004				227	233	232		1	1	1	1	1	1	0	1	1	1	1	1	1	1	1	1	1	1	1	1	1	1	1	1	1	1	1	1	1	1	1	1	1	1	1
ydfJ		Membrane protein YdfJ	171	171	1	11	5126				2237	2489	2487		1	1	1	1	1	1	1	1	1	1	1	1	1	1	0	1	1	1	1	1	1	1	1	1	1	1	1	1	1	1	1	1	1	1	1
rhaS_2		HTH-type transcriptional activator RhaS	171	171	1	11	5887				1562	1955	1952		1	1	1	1	1	1	1	1	1	1	1	1	1	1	1	1	1	1	1	1	1	1	1	1	1	1	1	1	1	1	1	1	1	1	1
lacF		PTS system lactose-specific EIIA component	171	171	1	11	64				311	311	311		1	1	1	0	1	1	1	1	1	1	1	1	1	1	1	1	1	1	1	1	1	1	1	1	1	1	1	1	1	1	1	1	1	1	1
rplE		50S ribosomal protein L5	171	171	1	11	118				539	539	539		1	1	1	1	1	1	1	1	1	1	1	1	1	1	1	1	1	1	1	1	1	1	1	1	1	1	1	1	1	1	1	1	1	1	1
rplO		50S ribosomal protein L15	171	171	1	11	110				440	440	440		1	1	1	1	1	1	1	1	1	1	1	0	1	1	1	1	1	1	1	1	1	1	1	1	1	1	1	1	1	1	1	1	1	1	1
rpmD		50S ribosomal protein L30	171	171	1	11	111				179	179	179		1	1	1	1	1	1	1	1	1	1	1	1	1	1	0	1	1	1	1	1	1	1	1	1	1	1	1	1	1	1	1	1	1	1	1
nnrD		ADP-dependent (S)-NAD(P)H-hydrate dehydratase	171	171	1	11	4918				812	812	812		1	1	1	1	1	1	1	1	1	1	1	1	1	1	1	1	1	1	1	1	1	1	1	1	1	1	1	1	1	1	1	1	1	1	1
dnaC		Replicative DNA helicase	171	171	1	11	4908				1400	1400	1400		1	1	1	0	1	1	1	1	1	1	1	1	1	1	1	1	1	1	1	1	1	1	1	1	1	1	1	1	1	1	1	1	1	1	1
group_3995		hypothetical protein	171	171	1	11	132				389	389	389		1	1	1	0	1	1	1	1	1	1	1	1	1	1	1	1	1	1	1	1	1	1	1	1	1	1	1	1	1	1	1	1	1	1	1
udk		Uridine kinase	171	171	1	11	3092				623	623	623		1	1	1	0	1	1	1	1	1	1	1	1	1	1	1	1	1	1	1	1	1	1	1	1	1	1	1	1	1	1	1	1	1	1	1
sarR		HTH-type transcriptional regulator SarR	171	171	1	11	5890				347	347	347		1	1	1	1	1	1	1	1	1	1	1	1	1	1	1	1	1	1	1	1	1	1	1	1	1	1	1	1	1	1	1	1	1	1	1
infA		Translation initiation factor IF-1	171	171	1	11	107				218	218	218		1	1	1	1	1	1	1	1	1	1	1	1	1	1	1	1	1	1	1	1	1	1	1	1	1	1	1	1	1	1	1	1	1	1	1
rpoA		DNA-directed RNA polymerase subunit alpha	171	171	1	11	102				944	944	944		1	1	1	0	1	1	1	1	1	1	1	1	1	1	1	1	1	1	1	1	1	1	1	1	1	1	1	1	1	1	1	1	1	1	1
group_4016		hypothetical protein	171	171	1	11	3196				866	866	866		1	1	1	0	1	1	1	1	1	1	1	1	1	1	1	1	1	1	1	1	1	1	1	1	1	1	1	1	1	1	1	1	1	1	1
rplM		50S ribosomal protein L13	171	171	1	11	94				437	437	437		1	1	1	1	1	1	1	1	1	1	1	0	1	1	1	1	1	1	1	1	1	1	1	1	1	1	1	1	1	1	1	1	1	1	1
ybbH_3		putative HTH-type transcriptional regulator YbbH	171	171	1	11	5869				872	872	872		1	1	1	1	1	1	1	1	1	1	1	1	1	1	1	1	1	1	1	1	1	1	1	1	1	1	1	1	1	1	1	1	1	1	1
ypdF		Aminopeptidase YpdF	171	171	1	11	3171				1061	1061	1061		0	1	1	1	1	1	1	1	1	1	1	1	1	1	1	1	1	1	1	1	1	1	1	1	1	1	1	1	1	1	1	1	1	1	1
serS		Serine--tRNA ligase	171	171	1	11	4916				1286	1286	1286		1	1	1	1	1	1	1	1	1	1	1	1	1	1	1	1	1	1	1	1	1	1	1	1	1	1	1	1	1	1	1	1	1	1	1
miaB		tRNA-2-methylthio-N(6)-dimethylallyladenosine synthase	171	171	1	11	3498				1544	1544	1544		1	1	1	1	1	1	1	1	1	1	1	1	1	1	1	1	1	1	1	1	1	1	1	1	1	1	1	1	1	1	1	1	1	1	1
recD2		ATP-dependent RecD-like DNA helicase	171	171	1	11	3084				2477	2477	2477		1	1	1	1	1	1	1	1	1	1	1	1	1	1	1	1	1	1	1	1	1	1	1	1	1	1	1	1	1	1	1	1	1	1	1
group_4158		hypothetical protein	171	171	1	11	1327				689	689	689		1	1	1	1	1	1	1	1	1	1	1	1	1	1	1	1	1	1	1	1	1	1	1	1	1	1	1	1	1	1	0	1	1	1	1
group_4199		hypothetical protein	171	171	1	11	1206				716	716	716		1	1	1	1	1	1	1	1	1	1	1	1	1	1	1	1	1	1	1	1	1	1	1	1	1	1	1	1	1	1	1	1	1	1	1
glcT		GlcA/glcB genes antiterminator	171	171	1	11	3407				851	851	851		1	1	1	1	1	1	1	1	1	1	1	1	1	1	1	1	1	1	1	1	1	1	1	1	1	1	1	1	1	1	1	1	1	1	1
zntB		Zinc transport protein ZntB	171	171	1	11	5833				947	947	947		1	1	1	1	1	1	1	1	1	1	1	1	1	1	1	1	1	1	1	1	1	1	1	1	1	1	1	1	1	1	1	1	1	1	1
cdd		Cytidine deaminase	171	171	1	11	3134				404	404	404		1	1	1	0	1	1	1	1	1	1	1	1	1	1	1	1	1	1	1	1	1	1	1	1	1	1	1	1	1	1	1	1	1	1	1
proC		Pyrroline-5-carboxylate reductase	171	171	1	11	3200				812	815	814		1	1	1	1	1	1	1	1	1	1	1	1	1	1	1	1	1	1	1	1	1	1	1	1	1	1	1	1	1	1	1	1	1	1	1
gntT		High-affinity gluconate transporter	171	171	1	11	5182				1358	1358	1358		1	1	1	1	1	1	1	1	1	1	1	1	1	1	1	1	1	1	1	1	1	1	1	1	1	1	1	1	1	1	1	1	1	1	1
parE		DNA topoisomerase 4 subunit B	171	171	1	11	3411				1991	1991	1991		1	0	1	1	1	1	1	1	1	1	1	1	1	1	1	1	1	1	1	1	1	1	1	1	1	1	1	1	1	1	1	1	1	1	1
ydhF		Oxidoreductase YdhF	171	171	1	11	1341				908	908	908		1	1	1	1	1	1	1	1	1	1	1	1	1	1	1	1	1	1	1	1	1	1	1	1	1	1	1	1	1	1	0	1	1	1	1
lacE		PTS system lactose-specific EIICB component	171	171	1	11	63				1712	1712	1712		1	1	1	1	1	1	1	1	1	1	1	1	1	1	0	1	1	1	1	1	1	1	1	1	1	1	1	1	1	1	1	1	1	1	1
farB_2		Fatty acid resistance protein FarB	171	171	1	11	39				395	1442	1325		1	1	1	1	1	1	1	1	1	1	1	1	1	1	1	1	1	1	1	1	1	1	1	1	1	1	1	1	1	1	1	1	1	1	1
group_4469		hypothetical protein	171	171	1	11	1335				683	683	683		1	1	1	1	1	1	1	1	1	1	1	1	1	1	1	1	1	1	1	1	1	1	1	1	1	1	1	1	1	1	0	1	1	1	1
lacB		Galactose-6-phosphate isomerase subunit LacB	171	171	1	11	68				515	515	515		1	1	1	1	1	1	1	1	1	1	1	1	1	1	0	1	1	1	1	1	1	1	1	1	1	1	1	1	1	1	1	1	1	1	1
flp		Protein flp	171	171	1	11	5661				1109	1517	1494		1	1	1	1	1	1	1	1	1	1	1	1	1	1	1	1	1	1	1	1	1	1	1	1	1	1	1	1	1	1	1	1	1	1	1
group_4744		hypothetical protein	171	171	1	11	5700				359	362	361		1	1	1	1	1	1	1	1	1	1	1	1	1	1	1	1	1	1	1	1	1	1	1	1	1	1	1	1	1	1	1	1	1	1	1
nucH		Thermonuclease	171	171	1	11	3442				533	533	533		1	1	1	1	1	1	1	1	1	1	1	1	1	1	1	1	1	1	1	1	1	1	1	1	1	1	1	1	1	1	1	1	1	1	1
group_4782		hypothetical protein	171	171	1	11	2017				680	680	680		1	1	1	1	1	1	1	1	1	1	1	1	1	1	1	1	1	1	1	1	1	1	1	1	1	1	1	1	1	1	1	1	1	1	1
group_4786		hypothetical protein	171	171	1	11	5666				656	656	656		1	1	1	1	1	1	1	1	1	1	1	1	1	1	1	1	1	1	1	1	1	1	1	1	1	1	1	1	1	1	1	1	1	1	1
hdfR_1		HTH-type transcriptional regulator HdfR	171	171	1	11	5851				884	884	884		1	1	1	1	1	1	1	1	1	1	1	1	1	1	0	1	1	1	1	1	1	1	1	1	1	1	1	1	1	1	1	1	1	1	1
odhA		2-oxoglutarate dehydrogenase E1 component	171	171	1	11	3347				2798	2798	2798		1	1	1	1	1	1	1	1	1	1	1	1	1	1	1	1	1	1	1	0	1	1	1	1	1	1	1	1	1	1	1	1	1	1	1
glpF		Glycerol uptake facilitator protein	171	171	1	11	3491				818	818	818		1	1	1	1	1	1	1	1	1	1	1	1	1	1	0	1	1	1	1	1	1	1	1	1	1	1	1	1	1	1	1	1	1	1	1
femA_3		Aminoacyltransferase FemA	171	171	1	11	3388				1262	1262	1262		1	1	1	1	1	1	1	1	1	1	1	1	1	1	1	1	1	1	1	1	0	1	1	1	1	1	1	1	1	1	1	1	1	1	1
rplU		50S ribosomal protein L21	171	171	1	11	3057				308	308	308		1	1	1	0	1	1	1	1	1	1	1	1	1	1	1	1	1	1	1	1	1	1	1	1	1	1	1	1	1	1	1	1	1	1	1
group_4996		Putative cytokinin riboside 5'-monophosphate phosphoribohydrolase	171	171	1	11	1333				566	566	566		1	1	1	1	1	1	1	1	1	1	1	1	1	1	1	1	1	1	1	1	1	1	1	1	1	1	1	1	1	1	0	1	1	1	1
lipM		Octanoyltransferase LipM	171	171	1	11	3168				830	830	830		1	1	1	0	1	1	1	1	1	1	1	1	1	1	1	1	1	1	1	1	1	1	1	1	1	1	1	1	1	1	1	1	1	1	1
group_5039		hypothetical protein	171	171	1	11	4777				737	740	739		1	1	1	1	1	1	1	1	1	1	1	1	1	1	1	1	1	1	1	1	1	1	1	1	1	1	1	1	1	1	1	1	1	1	1
mgt		Monofunctional glycosyltransferase	171	171	1	11	1930				809	809	809		1	1	1	1	1	1	1	1	1	1	1	1	1	1	1	1	1	1	1	1	1	1	1	1	1	1	1	1	1	1	1	1	1	1	1
group_506		hypothetical protein	171	171	1	11	4057				245	248	245		1	1	1	1	1	1	1	1	0	1	1	1	1	1	1	1	1	1	1	1	1	1	1	1	1	1	1	1	1	1	1	1	1	1	1
group_509		hypothetical protein	171	171	1	11	3701				1742	2606	2550		1	1	1	0	1	1	1	1	1	1	1	1	1	1	1	1	1	1	1	1	1	1	1	1	1	1	1	1	1	1	1	1	1	1	1
bcrA_2		Bacitracin transport ATP-binding protein BcrA	171	171	1	11	2016				872	872	872		1	1	1	1	1	1	1	1	1	1	1	1	1	1	1	1	1	1	1	1	1	1	1	1	1	1	1	1	1	1	1	1	1	1	1
auaG		Aurachin C monooxygenase/isomerase	171	171	1	11	5879				1124	1124	1124		1	1	1	1	1	1	1	1	1	1	1	1	1	1	1	1	1	1	1	1	1	1	1	1	1	1	1	1	1	1	1	1	1	1	1
mgrA		HTH-type transcriptional regulator MgrA	171	171	1	11	1339				443	443	443		1	1	1	1	1	1	1	1	1	1	1	1	1	1	1	1	1	1	1	1	1	1	1	1	1	1	1	1	1	1	0	1	1	1	1
recN		DNA repair protein RecN	171	171	1	11	3181				1679	1679	1679		1	1	1	1	1	1	1	1	1	1	1	1	1	1	1	1	1	1	1	1	1	1	1	1	1	1	1	1	1	1	1	1	1	1	1
icd		Isocitrate dehydrogenase [NADP]	171	171	1	11	3019				1268	1268	1268		1	1	1	1	1	1	1	1	1	1	1	1	1	1	1	1	1	1	1	1	1	1	1	1	1	1	1	1	1	1	1	1	1	1	1
hutI		Imidazolonepropionase	171	171	1	11	5853				1238	1238	1238		1	1	1	1	1	1	1	1	1	1	1	1	1	1	0	1	1	1	1	1	1	1	1	1	1	1	1	1	1	1	1	1	1	1	1
group_5272		hypothetical protein	171	171	1	11	3053				284	284	284		1	1	1	0	1	1	1	1	1	1	1	1	1	1	1	1	1	1	1	1	1	1	1	1	1	1	1	1	1	1	1	1	1	1	1
bcr_1		Bicyclomycin resistance protein	171	171	1	11	5668				1211	1211	1211		1	1	1	1	1	1	1	1	1	1	1	1	1	1	1	1	1	1	1	1	1	1	1	1	1	1	1	1	1	1	1	1	1	1	1
orr		Ornithine racemase	171	171	1	11	50				1070	1070	1070		1	1	1	1	1	1	1	1	1	1	1	1	1	1	1	1	1	1	1	1	1	1	1	1	1	1	1	1	1	1	1	1	1	1	1
group_5313		Putative multidrug export ATP-binding/permease protein	171	171	1	11	1338				1673	1673	1673		1	1	1	1	1	1	1	1	1	1	1	1	1	1	1	1	1	1	1	1	1	1	1	1	1	1	1	1	1	1	0	1	1	1	1
recQ_1		ATP-dependent DNA helicase RecQ	171	171	1	11	3271				1379	1379	1379		1	1	1	1	1	1	1	1	1	1	1	1	1	1	1	1	1	1	1	1	1	1	1	1	1	1	1	1	1	1	1	1	1	1	1
group_5348		hypothetical protein	171	171	1	11	3022				1487	1487	1487		1	1	1	1	1	1	1	1	1	1	1	1	1	1	1	1	1	1	1	1	1	1	1	1	1	1	1	1	1	1	1	1	1	1	1
group_5402		hypothetical protein	171	171	1	11	1331				299	299	299		1	1	1	1	1	1	1	1	1	1	1	1	1	1	1	1	1	1	1	1	1	1	1	1	1	1	1	1	1	1	0	1	1	1	1
yajO		1-deoxyxylulose-5-phosphate synthase YajO	171	171	1	11	3203				908	908	908		1	1	1	0	1	1	1	1	1	1	1	1	1	1	1	1	1	1	1	1	1	1	1	1	1	1	1	1	1	1	1	1	1	1	1
sbnD		Staphyloferrin B transporter	171	171	1	11	4797				1172	1172	1172		1	1	1	1	1	1	1	1	1	1	1	1	1	1	1	1	1	1	1	1	1	1	1	1	1	1	1	1	1	1	1	1	1	1	1
group_5438		DegV domain-containing protein	171	171	1	11	3334				839	839	839		1	1	1	1	1	1	1	1	1	1	1	1	1	1	1	1	1	1	1	1	1	1	1	1	1	1	1	1	1	1	1	1	1	1	1
gtfA_2		UDP-N-acetylglucosamine--peptide N-acetylglucosaminyltransferase GtfA subunit	171	176	1.03	11	1064				1490	1490	1490		1	1	1	1	1	1	1	1	1	1	1	1	1	1	1	1	1	1	1	1	1	1	1	1	1	1	1	1	1	1	1	1	1	1	1
aroE		Shikimate dehydrogenase (NADP(+))	171	171	1	11	3106				806	806	806		1	1	1	0	1	1	1	1	1	1	1	1	1	1	1	1	1	1	1	1	1	1	1	1	1	1	1	1	1	1	1	1	1	1	1
group_550		hypothetical protein	171	171	1	11	4590				896	1166	1161		1	1	1	1	1	1	1	1	1	1	1	1	1	1	1	1	1	1	1	1	1	1	1	1	1	1	1	1	1	1	1	1	1	1	1
dnaG		DNA primase	171	171	1	11	3140				1799	1817	1811		1	1	1	1	1	1	1	1	1	1	1	1	1	1	1	1	1	1	1	1	1	1	1	1	1	1	1	1	1	1	1	1	1	1	1
ysdC_2		Putative aminopeptidase YsdC	171	171	1	11	3398				1031	1031	1031		1	1	1	1	1	1	1	1	1	1	1	1	1	1	1	1	1	1	1	1	1	1	1	1	1	1	1	1	1	1	1	1	1	1	1
narH		Respiratory nitrate reductase 1 beta chain	171	171	1	11	5717				1559	1559	1559		1	1	1	1	1	1	1	1	1	1	1	1	1	1	1	1	1	1	1	1	1	1	1	1	1	1	1	1	1	1	1	1	1	1	1
hutU		Urocanate hydratase	171	171	1	11	5852				1661	1661	1661		1	1	1	1	1	1	1	1	1	1	1	1	1	1	0	1	1	1	1	1	1	1	1	1	1	1	1	1	1	1	1	1	1	1	1
cydD		ATP-binding/permease protein CydD	171	171	1	11	1337				1631	1631	1631		1	1	1	1	1	1	1	1	1	1	1	1	1	1	1	1	1	1	1	1	1	1	1	1	1	1	1	1	1	1	0	1	1	1	1
deoC1		Deoxyribose-phosphate aldolase 1	171	171	1	11	4774				662	662	662		1	1	1	1	1	1	1	1	1	1	1	1	1	1	1	1	1	1	1	1	1	1	1	1	1	1	1	1	1	1	1	1	1	1	1
group_5650		hypothetical protein	171	171	1	11	3056				530	530	530		1	1	1	1	1	1	1	1	1	1	1	1	1	1	1	1	1	1	1	1	1	1	1	1	1	1	1	1	1	1	1	1	1	1	1
group_5683		Putative NAD(P)H nitroreductase	171	171	1	11	5160				671	671	671		1	1	1	1	0	1	1	1	1	1	1	1	1	1	1	1	1	1	1	1	1	1	1	1	1	1	1	1	1	1	1	1	1	1	1
group_5699		putative oxidoreductase/MSMEI_2347	171	171	1	11	74				848	848	848		1	1	1	1	1	1	1	1	1	1	1	1	1	1	0	1	1	1	1	1	1	1	1	1	1	1	1	1	1	1	1	1	1	1	1
infC		Translation initiation factor IF-3	171	171	1	11	3032				560	560	560		1	1	1	1	1	1	1	1	1	1	1	1	1	1	1	1	1	1	1	1	1	1	1	1	1	1	1	1	1	1	1	1	1	1	1
nagA		N-acetylglucosamine-6-phosphate deacetylase	171	171	1	11	1356				1181	1181	1181		1	1	1	1	1	1	1	1	1	1	1	1	1	1	1	1	1	1	1	1	1	1	1	1	1	1	1	1	1	1	1	1	1	1	1
sbcD		Nuclease SbcCD subunit D	171	171	1	11	3419				1121	1121	1121		1	1	1	1	1	1	1	1	1	1	1	0	1	1	1	1	1	1	1	1	1	1	1	1	1	1	1	1	1	1	1	1	1	1	1
group_5822		hypothetical protein	171	171	1	11	5889				326	326	326		1	1	1	1	1	1	1	1	1	1	1	1	1	1	1	1	1	1	1	1	1	1	1	1	1	1	1	1	1	1	1	1	1	1	1
group_585		Lactonase drp35	171	171	1	11	4953				974	974	974		1	1	1	1	1	1	1	1	1	1	1	1	1	1	1	1	1	1	1	1	1	1	1	1	1	1	1	1	1	1	1	1	1	1	1
hutG		Formimidoylglutamase	171	171	1	11	5849				935	935	935		1	1	1	1	1	1	1	1	1	1	1	1	1	1	0	1	1	1	1	1	1	1	1	1	1	1	1	1	1	1	1	1	1	1	1
mnaA_1		UDP-N-acetylglucosamine 2-epimerase	171	171	1	11	4719				1145	1145	1145		1	1	1	1	1	1	1	1	1	1	1	1	1	1	1	1	1	1	1	1	1	1	1	1	1	1	1	1	1	1	1	1	1	1	1
group_5951		hypothetical protein	171	171	1	11	3399				1091	1091	1091		1	1	1	1	1	1	1	1	1	1	1	1	1	1	1	1	1	1	1	1	1	1	1	1	1	1	1	1	1	1	1	1	1	1	1
fruA		PTS system fructose-specific EIIABC component	171	171	1	11	1355				1958	1970	1958		1	1	1	1	1	1	1	1	1	1	1	1	1	1	1	1	1	1	1	1	1	1	1	1	1	1	1	1	1	1	1	1	1	1	1
group_682		hypothetical protein	171	171	1	11	53				611	1193	1170		1	1	1	1	1	1	1	1	1	1	1	1	1	1	1	1	1	1	1	1	1	1	1	1	1	1	1	1	1	1	1	1	1	1	1
group_780		hypothetical protein	171	171	1	11	1328				443	443	443		1	1	1	1	1	1	1	1	1	1	1	1	1	1	1	1	1	1	1	1	1	1	1	1	1	1	1	1	1	1	0	1	1	1	1
group_782		hypothetical protein	171	171	1	11	1334				401	458	445		1	1	1	1	1	1	1	1	1	1	1	1	1	1	1	1	1	1	1	1	1	1	1	1	1	1	1	1	1	1	0	1	1	1	1
yciC_1		Putative metal chaperone YciC	171	171	1	11	1340				926	926	926		1	1	1	1	1	1	1	1	1	1	1	1	1	1	1	1	1	1	1	1	1	1	1	1	1	1	1	1	1	1	0	1	1	1	1
appA		Oligopeptide-binding protein AppA	171	171	1	11	4102				266	1715	1554		1	1	1	0	1	1	1	1	1	1	1	1	1	1	1	1	1	1	1	1	1	1	1	1	1	1	1	1	1	1	1	1	1	1	1
oppF_1		Oligopeptide transport ATP-binding protein OppF	171	171	1	11	4099				980	980	980		1	1	1	0	1	1	1	1	1	1	1	1	1	1	1	1	1	1	1	1	1	1	1	1	1	1	1	1	1	1	1	1	1	1	1
group_820		hypothetical protein	171	171	1	11	4059				194	320	319		1	1	1	1	1	1	1	1	1	1	1	1	1	1	1	1	1	1	1	1	1	1	1	1	1	1	1	1	1	1	1	1	1	1	1
mutL		DNA mismatch repair protein MutL	171	171	1	11	3494				1166	2009	1954		1	1	1	1	1	1	1	1	1	1	1	1	1	1	1	1	1	1	1	1	1	1	1	1	1	1	1	1	1	1	1	1	1	1	1
fcl		GDP-L-fucose synthase	171	171	1	11	4737				887	887	887		1	1	1	1	1	1	1	1	1	1	1	1	1	1	1	1	1	1	1	1	1	1	1	1	1	1	1	1	1	1	1	1	1	1	1
group_948		NAD(P)H-dependent FAD/FMN reductase	171	171	1	11	4480				353	566	542		1	0	1	1	1	1	1	1	1	1	1	1	1	1	1	1	1	1	1	1	1	1	1	1	1	1	1	1	1	1	1	1	1	1	1
group_1126		hypothetical protein	170	170	1	11	5233	9	16		308	308	308		1	1	1	1	1	1	1	1	1	1	1	1	1	1	1	0	0	1	1	1	1	1	1	1	1	1	1	1	1	1	1	1	1	1	1
ywpJ		Phosphatase YwpJ	170	170	1	11	3799	34	6		209	857	834		1	1	1	1	1	1	1	1	1	1	1	1	1	1	1	0	0	1	1	1	1	1	1	1	1	1	1	1	1	1	1	1	1	1	1
group_1397		hypothetical protein	170	170	1	11	1345	49	1		284	284	284		1	1	1	1	1	1	1	1	1	1	1	1	1	1	1	0	0	1	1	1	1	1	1	1	1	1	1	1	1	1	1	1	1	1	1
bshC		Putative cysteine ligase BshC	170	170	1	11	3884	136	1		1595	1613	1612		1	1	1	1	1	1	1	1	1	1	1	1	1	1	1	1	1	1	1	1	1	1	1	1	1	1	1	1	1	1	1	1	1	1	1
group_1589		hypothetical protein	170	170	1	11	5124	85	1		485	548	547		1	1	1	1	1	1	1	1	1	1	1	1	1	1	1	0	0	1	1	1	1	1	1	1	1	1	1	1	1	1	1	1	1	1	1
group_2177		hypothetical protein	170	170	1	11	1346	49	2		617	617	617		1	1	1	1	1	1	1	1	1	1	1	1	1	1	1	0	0	1	1	1	1	1	1	1	1	1	1	1	1	1	1	1	1	1	1
group_2230		hypothetical protein	170	170	1	11	3443	12	6		188	188	188		1	1	1	1	1	1	1	1	1	1	1	1	1	1	1	1	1	1	1	1	1	1	1	1	1	1	1	1	1	1	1	1	1	1	1
mdrP		Na(+), Li(+), K(+)/H(+) antiporter	170	170	1	11	4705	28	1		1250	1250	1250		1	1	1	1	1	1	1	1	1	1	1	1	1	1	1	0	0	1	1	1	1	1	1	1	1	1	1	1	1	1	1	1	1	1	1
group_2302		hypothetical protein	170	170	1	11	5121	168	1		191	191	191		1	1	1	1	1	1	1	1	1	1	1	1	1	1	1	1	1	0	1	0	1	1	1	1	1	1	1	1	1	1	1	1	1	1	1
group_2329		hypothetical protein	170	170	1	11	5844	133	1		326	326	326		1	1	1	1	1	1	1	1	1	1	1	1	1	1	1	0	0	1	1	1	1	1	1	1	1	1	1	1	1	1	1	1	1	1	1
group_2443		hypothetical protein	170	170	1	11	4379	1	692		308	308	308		1	1	1	1	1	0	0	1	1	1	1	1	1	1	1	1	1	1	1	1	1	1	1	1	1	1	1	1	1	1	1	1	1	1	1
group_2798		putative hydrolase	170	170	1	11	80	24	2		815	824	815		1	1	1	1	1	1	1	1	1	1	1	1	1	1	1	0	0	1	1	1	1	1	1	1	1	1	1	1	1	1	1	1	1	1	1
group_315		hypothetical protein	170	170	1	11	1230	1	968		560	929	926		1	1	1	1	1	1	1	1	1	1	1	1	1	1	1	1	1	1	1	1	1	1	1	1	1	1	1	1	1	1	1	1	1	1	1
group_339		hypothetical protein	170	170	1	11	4881	2	260		602	602	602		1	1	1	1	1	1	1	1	1	1	1	1	1	1	1	0	0	1	1	1	1	1	1	1	1	1	1	1	1	1	1	1	1	1	1
group_390		hypothetical protein	170	170	1	11	79	24	6		854	854	854		1	1	1	1	1	1	1	1	1	1	1	1	1	1	1	0	0	1	1	1	1	1	1	1	1	1	1	1	1	1	1	1	1	1	1
mneS		Manganese efflux system protein MneS	170	170	1	11	5690	21	2		866	866	866		1	1	1	1	1	1	1	1	1	1	1	1	1	1	1	0	0	1	1	1	1	1	1	1	1	1	1	1	1	1	1	1	1	1	1
hlgA		Gamma-hemolysin component A	170	170	1	11	5685	21	6		965	965	965		1	1	1	1	1	1	1	1	1	1	1	1	1	1	1	1	1	0	1	0	1	1	1	1	1	1	1	1	1	1	1	1	1	1	1
aldA		Putative aldehyde dehydrogenase AldA	170	170	1	11	4716	319	3		1487	1487	1487		1	1	1	1	1	1	1	1	1	1	1	1	1	1	1	1	1	1	1	1	1	1	1	1	1	1	1	1	1	1	1	1	1	1	1
yehR		putative lipoprotein YehR	170	170	1	11	5642	32	1		455	455	455		1	1	1	1	1	1	1	1	1	1	1	1	1	1	1	1	1	1	1	1	1	1	1	1	1	1	1	1	1	1	1	1	1	1	1
panE		2-dehydropantoate 2-reductase	170	170	1	11	5659	139	1		935	935	935		1	1	1	1	1	1	1	1	1	1	1	1	1	1	1	0	0	1	1	1	1	1	1	1	1	1	1	1	1	1	1	1	1	1	1
czcD_1		Cadmium, cobalt and zinc/H(+)-K(+) antiporter	170	170	1	11	4714	319	6		959	959	959		1	1	1	1	1	1	1	1	1	1	1	1	1	1	1	1	1	1	1	1	1	1	1	1	1	1	1	1	1	1	1	1	1	1	1
bioK		L-Lysine--8-amino-7-oxononanoate transaminase	170	170	1	11	5678	166	1		1358	1358	1358		1	1	1	1	1	1	1	1	1	1	1	1	1	1	1	0	0	1	1	1	1	1	1	1	1	1	1	1	1	1	1	1	1	1	1
spa		Immunoglobulin G-binding protein A	170	170	1	11	4806	127	1		1454	1562	1508		1	1	1	0	1	1	1	1	1	1	1	1	1	1	1	1	1	1	1	1	1	1	1	1	1	1	1	1	1	1	1	1	1	1	1
group_531		hypothetical protein	170	170	1	11	4791	67	4		626	638	627		1	1	1	1	1	1	1	1	1	1	1	1	1	1	1	0	0	1	1	1	1	1	1	1	1	1	1	1	1	1	1	1	1	1	1
ggt		Glutathione hydrolase proenzyme	170	170	1	11	4668	25	4		2006	2006	2006		1	1	1	1	1	1	1	1	1	1	1	1	1	1	1	0	0	1	1	1	1	1	1	1	1	1	1	1	1	1	1	1	1	1	1
group_551		hypothetical protein	170	170	1	11	4589	64	4		722	1724	1426		1	1	1	1	1	1	1	1	1	1	1	1	1	1	1	1	1	1	1	1	1	1	1	1	1	1	1	1	1	1	1	1	1	1	1
group_5652		hypothetical protein	170	170	1	11	5667	129	1		473	473	473		1	1	1	1	1	1	1	1	1	1	1	1	1	1	1	0	0	1	1	1	1	1	1	1	1	1	1	1	1	1	1	1	1	1	1
ybaN		Inner membrane protein YbaN	170	170	1	11	4717	319	2		383	383	383		1	1	1	1	1	1	1	1	1	1	1	1	1	1	1	1	1	1	1	1	1	1	1	1	1	1	1	1	1	1	1	1	1	1	1
menE_2		2-succinylbenzoate--CoA ligase	170	175	1.03	11	1084				1376	1376	1376		1	1	1	1	1	1	1	1	1	1	1	1	1	1	1	0	0	1	1	1	1	1	1	1	1	1	1	1	1	1	1	1	1	1	1
isdI		Heme oxygenase (staphylobilin-producing) 2	170	170	1	11	4718	319	1		326	326	326		1	1	1	1	1	1	1	1	1	1	1	1	1	1	1	1	1	1	1	1	1	1	1	1	1	1	1	1	1	1	1	1	1	1	1
group_85		hypothetical protein	170	170	1	11	3162	18	1		323	497	387		1	1	1	1	1	1	1	1	1	1	1	1	1	1	1	1	1	1	1	1	1	1	1	1	1	1	1	1	1	1	1	1	1	1	1
trpG_1		Anthranilate synthase component 2	170	170	1	11	3395	38	1		566	566	566		1	1	1	1	1	1	1	1	1	1	1	1	1	1	1	0	0	1	1	1	1	1	1	1	1	1	1	1	1	1	1	1	1	1	1
group_957		hypothetical protein	170	170	1	11	4444	101	1		362	572	570		1	1	1	1	1	1	1	1	1	1	1	1	1	1	1	0	0	1	1	1	1	1	1	1	1	1	1	1	1	1	1	1	1	1	1
nfrA		NADPH-dependent oxidoreductase	170	170	1	11	4433	179	1		755	806	757		1	1	1	1	1	1	1	1	1	1	1	1	1	1	1	1	1	0	1	0	1	1	1	1	1	1	1	1	1	1	1	1	1	1	1
group_962		hypothetical protein	170	170	1	11	4423	8	15		410	728	671		1	1	1	1	1	1	1	1	1	1	1	1	1	1	1	0	0	1	1	1	1	1	1	1	1	1	1	1	1	1	1	1	1	1	1
group_986		hypothetical protein	170	170	1	11	5100	95	2		383	821	777		1	1	1	1	1	1	1	1	0	1	1	1	1	1	1	1	1	1	1	1	1	1	1	1	1	1	1	1	1	1	1	1	1	1	1
group_989		hypothetical protein	170	170	1	11	5096	195	1		461	557	553		1	1	1	1	1	1	1	1	1	1	1	1	1	1	1	0	0	1	1	1	1	1	1	1	1	1	1	1	1	1	1	1	1	1	1
recX		Regulatory protein RecX	169	169	1	11	1929	112	4		548	818	814		1	1	1	1	1	1	1	0	0	1	1	1	1	1	1	1	1	1	1	1	1	1	1	1	1	1	1	1	1	1	1	1	1	1	1
leuC		3-isopropylmalate dehydratase large subunit	169	169	1	11	1453	111	1		269	1370	1337		0	1	1	1	1	1	1	1	1	1	1	1	1	1	1	1	1	1	1	1	1	1	1	1	1	1	1	1	1	1	1	1	1	1	1
mnhD1_2		Na(+)/H(+) antiporter subunit D1	169	169	1	11	1239	11	1		1484	1496	1494		1	1	1	1	1	1	1	1	1	1	1	1	1	1	1	1	1	1	1	1	1	1	1	1	1	1	1	1	1	1	1	1	1	1	1
group_1377		hypothetical protein	169	169	1	11	1242	11	6		437	437	437		1	1	1	1	1	1	1	1	1	1	1	1	1	1	1	1	1	1	1	1	1	1	1	1	1	1	1	1	1	1	1	1	1	1	1
graR_2		Response regulator protein GraR	169	169	1	11	1277	17	4		575	674	669		1	1	1	1	1	1	1	1	1	1	1	1	1	1	1	1	1	1	1	1	0	1	0	1	1	1	1	1	1	1	1	0	1	1	1
group_1455		hypothetical protein	169	169	1	11	3980	46	2		191	191	191		1	1	1	1	1	1	1	1	1	1	1	1	1	1	1	1	1	1	1	1	1	1	1	1	1	1	1	1	1	1	1	1	1	1	1
comGC		ComG operon protein 3	169	169	1	11	3159	18	4		152	311	310		1	1	1	1	1	1	1	1	1	1	1	1	1	1	1	1	1	1	1	1	1	1	1	1	1	1	1	1	1	1	1	1	1	1	1
group_1885		hypothetical protein	169	169	1	11	4349	192	1		314	407	324		1	1	1	0	1	1	1	1	1	1	1	1	1	1	1	0	0	1	1	1	1	1	1	1	1	1	1	1	1	1	1	1	1	1	1
group_195		hypothetical protein	169	169	1	11	4360	1	661		806	1328	1309		1	1	1	0	1	1	1	1	1	1	1	1	1	1	1	0	0	1	1	1	1	1	1	1	1	1	1	1	1	1	1	1	1	1	1
trpD2		Anthranilate phosphoribosyltransferase 2	169	169	1	11	3394	38	4		242	998	909		1	1	1	1	1	1	1	1	1	1	1	1	1	1	1	1	1	1	1	1	1	1	1	1	1	1	1	1	1	1	1	1	1	1	1
nhaK_2		Sodium, potassium, lithium and rubidium/H(+) antiporter	169	169	1	11	1245	11	5		2042	2042	2042		1	1	1	1	1	1	1	1	1	1	1	1	1	1	1	1	1	1	1	1	1	1	1	1	1	1	1	1	1	1	1	1	1	1	1
mrpF		Na(+)/H(+) antiporter subunit F	169	169	1	11	1241	11	7		302	302	302		1	1	1	1	1	1	1	1	1	1	1	1	1	1	1	1	1	1	1	1	1	1	1	1	1	1	1	1	1	1	1	1	1	1	1
mrpE		Na(+)/H(+) antiporter subunit E	169	169	1	11	1240	11	8		482	482	482		1	1	1	1	1	1	1	1	1	1	1	1	1	1	1	1	1	1	1	1	1	1	1	1	1	1	1	1	1	1	1	1	1	1	1
ettA		Energy-dependent translational throttle protein EttA	169	169	1	11	1376	102	2		1343	1877	1870		1	1	1	1	0	1	1	1	1	1	1	1	1	1	1	1	1	1	1	1	1	1	1	1	1	1	1	1	1	1	1	1	1	1	1
group_921		hypothetical protein	169	169	1	11	4684	193	1		281	281	281		1	1	1	0	1	1	1	1	1	1	1	1	1	1	1	0	0	1	1	1	1	1	1	1	1	1	1	1	1	1	1	1	1	1	1
group_993		hypothetical protein	169	169	1	11	5079	118	2		371	587	562		1	1	1	1	1	1	1	1	1	1	1	1	1	1	1	0	0	1	1	1	1	1	1	1	1	1	1	1	1	1	1	1	1	1	1
sirC		Precorrin-2 dehydrogenase	169	169	1	11	5051	155	1		605	608	605		1	1	1	0	1	1	1	1	1	1	1	1	1	1	1	0	0	1	1	1	1	1	1	1	1	1	1	1	1	1	1	1	1	1	1
group_1386		hypothetical protein	168	168	1	11	1323	39	3		206	644	641		1	1	1	1	1	1	1	1	1	1	1	1	1	1	1	1	1	1	1	1	1	1	1	1	1	1	1	1	1	1	1	1	1	1	1
narG		Respiratory nitrate reductase 1 alpha chain	168	168	1	11	5716	47	3		1403	3689	3675		1	1	1	1	1	1	1	1	1	1	1	1	1	1	1	1	1	1	1	1	1	1	1	1	1	1	1	1	1	1	1	1	1	1	1
group_1774		hypothetical protein	168	168	1	11	3331	167	1		437	437	437		1	1	1	1	1	1	1	1	1	1	1	1	1	1	1	1	1	1	1	1	1	1	1	1	1	1	1	1	1	1	1	1	1	1	1
group_1776		queuosine precursor transporter	168	168	1	11	3324	1	889		671	704	700		1	1	1	1	1	1	1	1	1	1	1	1	1	1	1	1	1	1	1	1	1	1	1	1	1	1	1	1	1	1	1	1	1	1	1
lpl2_2		putative lipoprotein	168	168	1	11	4369	1	666		221	815	791		1	1	1	1	1	0	0	1	1	1	1	1	1	1	1	0	0	1	1	1	1	1	1	1	1	1	1	1	1	1	1	1	1	1	1
mrpA		Na(+)/H(+) antiporter subunit A	168	168	1	11	1236	1	964		1637	2402	2397		0	1	1	1	1	1	1	1	1	1	1	1	1	1	1	1	1	1	1	1	1	1	1	1	1	1	1	1	1	1	1	1	1	1	1
group_5275		hypothetical protein	168	168	1	11	3329	1	886		251	251	251		1	1	1	1	1	1	1	1	1	1	1	1	1	1	1	1	1	1	1	1	1	1	1	1	1	1	1	1	1	1	1	1	1	1	1
saeR		Response regulator SaeR	168	168	1	11	1363	120	1		401	686	684		1	1	1	1	1	1	1	1	1	1	1	1	1	1	1	1	1	1	1	1	1	1	1	1	1	1	1	1	1	1	1	1	1	1	1
qoxB		putative quinol oxidase subunit 1	168	168	1	11	4031	173	1		1988	1988	1988		1	1	1	1	1	1	1	0	0	1	1	1	0	0	1	1	1	1	1	1	1	1	1	1	1	1	1	1	1	1	1	1	1	1	1
focA		putative formate transporter 1	168	168	1	11	4533	74	5		599	824	822		1	1	1	1	1	1	1	1	1	1	1	1	1	1	1	1	1	1	1	1	1	1	1	1	1	1	1	1	1	1	1	1	1	1	1
group_1036		hypothetical protein	167	167	1	11	3160	18	3		362	434	433		1	1	1	1	1	1	1	1	1	1	1	1	1	1	1	1	1	1	1	1	1	1	1	1	1	1	1	1	1	1	1	1	1	1	1
group_1628		hypothetical protein	167	167	1	11	3052	31	4		554	686	641		1	1	1	1	1	1	1	1	1	1	1	1	1	1	1	1	1	1	1	1	1	1	1	1	1	1	1	1	1	1	1	1	1	1	1
group_1648		hypothetical protein	165	165	1	11	3161	18	2		110	299	297		1	1	1	1	1	1	1	1	1	1	1	1	1	1	1	1	1	1	1	1	1	1	1	1	1	1	1	1	1	1	1	1	1	1	1
mgtE		Magnesium transporter MgtE	165	165	1	11	4083	77	2		323	1385	1190		1	1	1	1	1	1	1	1	1	1	1	1	1	1	1	1	1	1	1	1	1	1	1	1	1	1	1	1	1	1	1	1	1	1	1
asp2		Accessory Sec system protein Asp2	164	164	1	11	5008	1	431		1325	1571	1569		1	1	1	1	1	1	1	1	1	1	1	1	1	1	1	1	1	1	1	1	1	1	1	1	1	1	1	1	1	1	1	1	1	1	1
group_468		hypothetical protein	164	164	1	11	5805	76	2		335	401	348		0	0	0	1	1	1	1	1	1	0	0	1	0	0	0	1	1	1	1	1	1	1	1	1	1	1	1	1	1	1	1	1	1	1	1
ribBA		Riboflavin biosynthesis protein RibBA	164	164	1	11	2829	350	1		920	1181	1156		0	0	0	1	1	1	1	1	1	0	0	1	0	0	0	1	1	1	1	1	1	1	1	1	1	1	1	1	1	1	1	1	1	1	1
arlS		Signal transduction histidine-protein kinase ArlS	164	164	1	11	3345	114	2		806	1355	1347		0	1	0	1	1	1	1	1	1	0	0	1	0	0	0	1	1	1	1	0	1	1	1	1	1	1	1	1	1	1	1	1	1	1	1
group_716		hypothetical protein	164	164	1	11	4486	175	1		305	440	424		0	0	0	1	1	1	1	1	1	0	0	1	0	0	0	1	1	1	1	1	1	1	1	1	1	1	1	1	1	1	1	1	1	1	1
dtpT		Di-/tripeptide transporter	164	164	1	11	1385	23	5		1217	1505	1503		1	1	1	1	1	1	1	1	1	1	1	1	1	1	1	1	1	1	1	1	1	1	1	1	1	1	1	1	1	1	1	1	1	1	1
moaC		Cyclic pyranopterin monophosphate synthase	163	163	1	11	154	132	1		494	494	494		0	0	0	0	1	1	1	1	1	0	0	1	0	0	0	1	1	1	1	1	1	1	1	1	1	1	1	1	1	1	1	1	1	1	1
[truncated: 4,021 more rows]
[truncated: 137 more columns]

## Sheet: Table S5
Rerence_Isolate	Queried_Isolate	SNPs	PT_Reference	ST_Compared	ST_Com	PT_Comp
57-0	100-0	1340	57	5	840	100
57-0	100-1	1677	57	5	840	100
57-0	101-0	901	57	5	5	101
57-0	101-1	886	57	5	5	101
57-0	101-19	41683	57	5	45	101
57-0	101-2	885	57	5	5	101
57-0	101-3	896	57	5	5	101
57-0	101-4	851	57	5	5	101
57-0	101-5	896	57	5	5	101
57-0	101-6	826	57	5	5	101
57-0	101-7	833	57	5	5	101
57-0	101-8	832	57	5	5	101
57-0	102-0	623	57	5	5	102
57-0	102-1	581	57	5	5	102
57-0	102-10	420	57	5	5	102
57-0	102-11	588	57	5	5	102
57-0	102-12	613	57	5	5	102
57-0	102-13	559	57	5	5	102
57-0	102-14	620	57	5	5	102
57-0	102-15	600	57	5	5	102
57-0	102-16	610	57	5	5	102
57-0	102-17	624	57	5	5	102
57-0	102-18	584	57	5	5	102
57-0	102-19	616	57	5	5	102
57-0	102-20	621	57	5	5	102
57-0	102-21	606	57	5	5	102
57-0	102-22	608	57	5	5	102
57-0	102-23	614	57	5	5	102
57-0	102-24	620	57	5	5	102
57-0	102-25	580	57	5	5	102
57-0	102-26	616	57	5	5	102
57-0	102-4	569	57	5	5	102
57-0	102-5	576	57	5	5	102
57-0	102-6	593	57	5	5	102
57-0	102-7	614	57	5	5	102
57-0	102-8	588	57	5	5	102
57-0	102-9	605	57	5	5	102
57-0	104-0	1739	57	5	5	104
57-0	104-1	1702	57	5	5	104
57-0	104-10	1738	57	5	5	104
57-0	104-11	1738	57	5	5	104
57-0	104-12	1639	57	5	5	104
57-0	104-13	1736	57	5	5	104
57-0	104-14	1587	57	5	5	104
57-0	104-15	1719	57	5	5	104
57-0	104-16	1792	57	5	5	104
57-0	104-17	1791	57	5	5	104
57-0	104-18	1746	57	5	5	104
57-0	104-19	1646	57	5	5	104
57-0	104-2	1721	57	5	5	104
57-0	104-20	1781	57	5	5	104
57-0	104-21	1480	57	5	5	104
57-0	104-22	1751	57	5	5	104
57-0	104-23	1659	57	5	5	104
57-0	104-24	1724	57	5	5	104
57-0	104-25	1738	57	5	5	104
57-0	104-26	1765	57	5	5	104
57-0	104-4	1739	57	5	5	104
57-0	104-5	1604	57	5	5	104
57-0	104-6	1660	57	5	5	104
57-0	104-7	1649	57	5	5	104
57-0	104-8	1741	57	5	5	104
57-0	104-9	1739	57	5	5	104
57-0	105-3	717	57	5	5	105
57-0	106-0	2371	57	5	5	106
57-0	106-1	2407	57	5	5	106
57-0	106-10	2395	57	5	5	106
57-0	106-11	2328	57	5	5	106
57-0	106-12	2363	57	5	5	106
57-0	106-13	2402	57	5	5	106
57-0	106-14	2379	57	5	5	106
57-0	106-15	2405	57	5	5	106
57-0	106-16	2445	57	5	5	106
57-0	106-17	2318	57	5	5	106
57-0	106-19	2200	57	5	5	106
57-0	106-2	2344	57	5	5	106
57-0	106-20	2255	57	5	5	106
57-0	106-21	2403	57	5	5	106
57-0	106-3	2404	57	5	5	106
57-0	106-4	2319	57	5	5	106
57-0	106-5	2403	57	5	5	106
57-0	106-6	2290	57	5	5	106
57-0	106-7	2100	57	5	5	106
57-0	106-8	2430	57	5	5	106
57-0	106-9	2331	57	5	5	106
57-0	107-0	982	57	5	3390	107
57-0	107-1	979	57	5	3390	107
57-0	107-2	991	57	5	3390	107
57-0	107-3	989	57	5	3390	107
57-0	107-4	995	57	5	3390	107
57-0	111-1.1	42071	57	5	45	111
57-0	111-1.2	42049	57	5	45	111
57-0	114-9	17389	57	5	8	114
57-0	119-0	32648	57	5	59	119
57-0	119-0.2	32701	57	5	59	119
57-0	119-10	38859	57	5	30	119
57-0	119-10.2	38869	57	5	30	119
57-0	119-11	38719	57	5	30	119
57-0	119-6	39237	57	5	30	119
57-0	119-7	38885	57	5	30	119
57-0	119-7.2	38864	57	5	30	119
57-0	119-8	38737	57	5	30	119
57-0	119-8.3	38663	57	5	30	119
57-0	119-9	38874	57	5	30	119
57-0	129-0	1668	57	5	1866	129
57-0	129-1	1657	57	5	1866	129
57-0	201-0	611	57	5	5	201
57-0	201-1	682	57	5	5	201
57-0	201-11	690	57	5	5	201
57-0	201-12	642	57	5	5	201
57-0	201-12.2	630	57	5	5	201
57-0	201-14.2	630	57	5	5	201
57-0	201-14	653	57	5	5	201
57-0	201-15	645	57	5	5	201
57-0	201-17	636	57	5	5	201
57-0	201-2	670	57	5	5	201
57-0	201-3	641	57	5	5	201
57-0	201-4	632	57	5	5	201
57-0	201-6	631	57	5	5	201
57-0	201-7	701	57	5	5	201
57-0	201-9	681	57	5	5	201
57-0	201-9.2	500	57	5	5	201
57-0	203-10	666	57	5	5	203
57-0	203-12	838	57	5	5	203
57-0	203-13	542	57	5	5	203
57-0	203-14	572	57	5	5	203
57-0	203-15	668	57	5	5	203
57-0	203-16	552	57	5	5	203
57-0	203-17	774	57	5	5	203
57-0	203-18	799	57	5	5	203
57-0	203-19	660	57	5	5	203
57-0	203-20	582	57	5	5	203
57-0	203-9	790	57	5	5	203
57-0	204-15	1350	57	5	5	204
57-0	207-0	42409	57	5	45	207
57-0	207-1	41869	57	5	45	207
57-0	207-10	41870	57	5	45	207
57-0	207-11	42335	57	5	45	207
57-0	207-12	42306	57	5	45	207
57-0	207-14	41962	57	5	45	207
57-0	207-16	41887	57	5	45	207
57-0	207-17	41916	57	5	45	207
57-0	207-2	40702	57	5	45	207
57-0	207-3	41860	57	5	45	207
57-0	207-4	41146	57	5	45	207
57-0	207-5	41513	57	5	45	207
57-0	207-6	41820	57	5	45	207
57-0	207-7	41517	57	5	45	207
57-0	207-8	41070	57	5	45	207
57-0	207-9	42345	57	5	45	207
57-0	210-0	1432	57	5	5	210
57-0	210-6	1508	57	5	5	210
57-0	86-0	17534	57	5	8	86
57-0	86-10	17642	57	5	8	86
57-0	86-2	17505	57	5	8	86
57-0	86-7	17726	57	5	8	86
57-0	86-7.2	17646	57	5	8	86
57-0	95-0	17870	57	5	15	95
57-0	97-2	1304	57	5	5	97
86-0	100-0	16461	86	8	840	100
86-0	100-1	16878	86	8	840	100
86-0	101-0	17864	86	8	5	101
86-0	101-1	17834	86	8	5	101
86-0	101-19	41599	86	8	45	101
86-0	101-2	17816	86	8	5	101
86-0	101-3	17784	86	8	5	101
86-0	101-4	17025	86	8	5	101
86-0	101-5	17628	86	8	5	101
86-0	101-6	16572	86	8	5	101
86-0	101-7	16891	86	8	5	101
86-0	101-8	17126	86	8	5	101
86-0	102-0	17703	86	8	5	102
86-0	102-1	16445	86	8	5	102
86-0	102-10	17123	86	8	5	102
86-0	102-11	16890	86	8	5	102
86-0	102-12	17363	86	8	5	102
86-0	102-13	16558	86	8	5	102
86-0	102-14	17680	86	8	5	102
86-0	102-15	17307	86	8	5	102
86-0	102-16	17953	86	8	5	102
86-0	102-17	18047	86	8	5	102
86-0	102-18	17416	86	8	5	102
86-0	102-19	17620	86	8	5	102
86-0	102-20	17663	86	8	5	102
86-0	102-21	17350	86	8	5	102
86-0	102-22	17244	86	8	5	102
86-0	102-23	17536	86	8	5	102
86-0	102-24	17678	86	8	5	102
86-0	102-25	16847	86	8	5	102
86-0	102-26	17539	86	8	5	102
86-0	102-4	17329	86	8	5	102
86-0	102-5	16909	86	8	5	102
86-0	102-6	17092	86	8	5	102
86-0	102-7	17682	86	8	5	102
86-0	102-8	17014	86	8	5	102
86-0	102-9	17276	86	8	5	102
86-0	104-0	17497	86	8	5	104
86-0	104-1	17349	86	8	5	104
86-0	104-10	17561	86	8	5	104
86-0	104-11	17516	86	8	5	104
86-0	104-12	16509	86	8	5	104
86-0	104-13	17524	86	8	5	104
86-0	104-14	16414	86	8	5	104
86-0	104-15	17504	86	8	5	104
86-0	104-16	17637	86	8	5	104
86-0	104-17	17578	86	8	5	104
86-0	104-18	17537	86	8	5	104
86-0	104-19	17168	86	8	5	104
86-0	104-2	17460	86	8	5	104
86-0	104-20	17606	86	8	5	104
86-0	104-21	17145	86	8	5	104
86-0	104-22	17528	86	8	5	104
86-0	104-23	16820	86	8	5	104
86-0	104-24	17496	86	8	5	104
86-0	104-25	17517	86	8	5	104
86-0	104-26	17512	86	8	5	104
86-0	104-4	17559	86	8	5	104
86-0	104-5	16445	86	8	5	104
86-0	104-6	17041	86	8	5	104
86-0	104-7	17216	86	8	5	104
86-0	104-8	17533	86	8	5	104
86-0	104-9	17500	86	8	5	104
86-0	105-3	17839	86	8	5	105
86-0	106-0	17838	86	8	5	106
86-0	106-1	17898	86	8	5	106
86-0	106-10	17841	86	8	5	106
86-0	106-11	17456	86	8	5	106
86-0	106-12	17540	86	8	5	106
86-0	106-13	17899	86	8	5	106
86-0	106-14	17905	86	8	5	106
86-0	106-15	17955	86	8	5	106
86-0	106-16	17973	86	8	5	106
86-0	106-17	17653	86	8	5	106
86-0	106-19	16574	86	8	5	106
86-0	106-2	17426	86	8	5	106
86-0	106-20	16705	86	8	5	106
86-0	106-21	17876	86	8	5	106
86-0	106-3	17660	86	8	5	106
86-0	106-4	17208	86	8	5	106
86-0	106-5	17904	86	8	5	106
86-0	106-6	17567	86	8	5	106
86-0	106-7	17687	86	8	5	106
86-0	106-8	17982	86	8	5	106
86-0	106-9	17283	86	8	5	106
86-0	107-0	17432	86	8	3390	107
86-0	107-1	17501	86	8	3390	107
86-0	107-2	17592	86	8	3390	107
86-0	107-3	17527	86	8	3390	107
86-0	107-4	17582	86	8	3390	107
86-0	111-1.1	42159	86	8	45	111
86-0	111-1.2	42104	86	8	45	111
86-0	114-9	1050	86	8	8	114
86-0	119-0	32977	86	8	59	119
86-0	119-0.2	33035	86	8	59	119
86-0	119-10	38711	86	8	30	119
86-0	119-10.2	38692	86	8	30	119
86-0	119-11	38528	86	8	30	119
86-0	119-6	39012	86	8	30	119
86-0	119-7	38662	86	8	30	119
86-0	119-7.2	38687	86	8	30	119
86-0	119-8	38566	86	8	30	119
86-0	119-8.3	38478	86	8	30	119
86-0	119-9	38654	86	8	30	119
86-0	129-0	17602	86	8	1866	129
86-0	129-1	17536	86	8	1866	129
86-0	201-0	17841	86	8	5	201
86-0	201-1	18062	86	8	5	201
86-0	201-11	18222	86	8	5	201
86-0	201-12	18045	86	8	5	201
86-0	201-12.2	18002	86	8	5	201
86-0	201-14.2	18009	86	8	5	201
86-0	201-14	18151	86	8	5	201
86-0	201-15	18039	86	8	5	201
86-0	201-17	18024	86	8	5	201
86-0	201-2	18054	86	8	5	201
86-0	201-3	18050	86	8	5	201
86-0	201-4	17884	86	8	5	201
86-0	201-6	17990	86	8	5	201
86-0	201-7	18211	86	8	5	201
86-0	201-9	18073	86	8	5	201
86-0	201-9.2	17588	86	8	5	201
86-0	203-10	17928	86	8	5	203
86-0	203-12	17681	86	8	5	203
86-0	203-13	17678	86	8	5	203
86-0	203-14	17665	86	8	5	203
86-0	203-15	17920	86	8	5	203
86-0	203-16	17881	86	8	5	203
86-0	203-17	17696	86	8	5	203
86-0	203-18	17719	86	8	5	203
86-0	203-19	17760	86	8	5	203
86-0	203-20	17817	86	8	5	203
86-0	203-9	17825	86	8	5	203
86-0	204-15	17816	86	8	5	204
86-0	207-0	42327	86	8	45	207
86-0	207-1	41815	86	8	45	207
86-0	207-10	41814	86	8	45	207
86-0	207-11	42260	86	8	45	207
86-0	207-12	42255	86	8	45	207
86-0	207-14	41920	86	8	45	207
86-0	207-16	41860	86	8	45	207
86-0	207-17	41865	86	8	45	207
86-0	207-2	40637	86	8	45	207
86-0	207-3	41762	86	8	45	207
86-0	207-4	41034	86	8	45	207
86-0	207-5	41409	86	8	45	207
86-0	207-6	41757	86	8	45	207
86-0	207-7	41440	86	8	45	207
86-0	207-8	40970	86	8	45	207
86-0	207-9	42316	86	8	45	207
86-0	210-0	17695	86	8	5	210
86-0	210-6	17937	86	8	5	210
86-0	57-0	17613	86	8	5	57
86-0	86-10	28	86	8	8	86
86-0	86-2	10	86	8	8	86
86-0	86-7	18	86	8	8	86
86-0	86-7.2	16	86	8	8	86
86-0	95-0	15240	86	8	15	95
86-0	97-2	17809	86	8	5	97
86-10	86-10.2	22	86	8	8	86
86-7	86-7.2	4	86	8	8	86
95-0	100-0	16465	95	15	840	100
95-0	100-1	16756	95	15	840	100
95-0	101-0	17760	95	15	5	101
95-0	101-1	17796	95	15	5	101
95-0	101-19	41667	95	15	45	101
95-0	101-2	17780	95	15	5	101
95-0	101-3	17720	95	15	5	101
95-0	101-4	17216	95	15	5	101
95-0	101-5	17608	95	15	5	101
95-0	101-6	16883	95	15	5	101
95-0	101-7	17034	95	15	5	101
95-0	101-8	17293	95	15	5	101
95-0	102-0	17349	95	15	5	102
95-0	102-1	16416	95	15	5	102
95-0	102-10	17184	95	15	5	102
95-0	102-11	16771	95	15	5	102
95-0	102-12	17124	95	15	5	102
95-0	102-13	16431	95	15	5	102
95-0	102-14	17361	95	15	5	102
95-0	102-15	17056	95	15	5	102
95-0	102-16	17746	95	15	5	102
95-0	102-17	17842	95	15	5	102
95-0	102-18	17096	95	15	5	102
95-0	102-19	17521	95	15	5	102
95-0	102-20	17331	95	15	5	102
95-0	102-21	17299	95	15	5	102
95-0	102-22	17011	95	15	5	102
95-0	102-23	17239	95	15	5	102
95-0	102-24	17355	95	15	5	102
95-0	102-25	16683	95	15	5	102
95-0	102-26	17253	95	15	5	102
95-0	102-4	17024	95	15	5	102
95-0	102-5	16760	95	15	5	102
95-0	102-6	16926	95	15	5	102
95-0	102-7	17356	95	15	5	102
95-0	102-8	16861	95	15	5	102
95-0	102-9	17060	95	15	5	102
95-0	104-0	17242	95	15	5	104
95-0	104-1	17078	95	15	5	104
95-0	104-10	17293	95	15	5	104
95-0	104-11	17248	95	15	5	104
95-0	104-12	16514	95	15	5	104
95-0	104-13	17254	95	15	5	104
95-0	104-14	16454	95	15	5	104
95-0	104-15	17219	95	15	5	104
95-0	104-16	17359	95	15	5	104
95-0	104-17	17285	95	15	5	104
95-0	104-18	17264	95	15	5	104
95-0	104-19	16921	95	15	5	104
95-0	104-2	17181	95	15	5	104
95-0	104-20	17327	95	15	5	104
95-0	104-21	16853	95	15	5	104
95-0	104-22	17244	95	15	5	104
95-0	104-23	16725	95	15	5	104
95-0	104-24	17248	95	15	5	104
95-0	104-25	17231	95	15	5	104
95-0	104-26	17314	95	15	5	104
95-0	104-4	17307	95	15	5	104
95-0	104-5	16449	95	15	5	104
95-0	104-6	16917	95	15	5	104
95-0	104-7	16960	95	15	5	104
95-0	104-8	17253	95	15	5	104
95-0	104-9	17229	95	15	5	104
95-0	105-3	17322	95	15	5	105
95-0	106-0	17735	95	15	5	106
95-0	106-1	17804	95	15	5	106
95-0	106-10	17747	95	15	5	106
95-0	106-11	17448	95	15	5	106
95-0	106-12	17537	95	15	5	106
95-0	106-13	17790	95	15	5	106
95-0	106-14	17772	95	15	5	106
95-0	106-15	17805	95	15	5	106
95-0	106-16	17854	95	15	5	106
95-0	106-17	17573	95	15	5	106
95-0	106-19	16770	95	15	5	106
95-0	106-2	17477	95	15	5	106
95-0	106-20	16880	95	15	5	106
95-0	106-21	17766	95	15	5	106
95-0	106-3	17605	95	15	5	106
95-0	106-4	17293	95	15	5	106
95-0	106-5	17785	95	15	5	106
95-0	106-6	17502	95	15	5	106
95-0	106-7	17829	95	15	5	106
95-0	106-8	17866	95	15	5	106
95-0	106-9	17305	95	15	5	106
95-0	107-0	17185	95	15	3390	107
95-0	107-1	17232	95	15	3390	107
95-0	107-2	17324	95	15	3390	107
95-0	107-3	17241	95	15	3390	107
95-0	107-4	17277	95	15	3390	107
95-0	111-1.1	41972	95	15	45	111
95-0	111-1.2	41883	95	15	45	111
95-0	114-9	15760	95	15	8	114
95-0	119-0	33267	95	15	59	119
95-0	119-0.2	33305	95	15	59	119
95-0	119-10	39061	95	15	30	119
95-0	119-10.2	39044	95	15	30	119
95-0	119-11	38875	95	15	30	119
95-0	119-6	39362	95	15	30	119
95-0	119-7	39058	95	15	30	119
95-0	119-7.2	39059	95	15	30	119
95-0	119-8	38928	95	15	30	119
95-0	119-8.3	38817	95	15	30	119
95-0	119-9	39066	95	15	30	119
95-0	129-0	17477	95	15	1866	129
95-0	129-1	17400	95	15	1866	129
95-0	201-0	17842	95	15	5	201
95-0	201-1	18075	95	15	5	201
95-0	201-11	18232	95	15	5	201
95-0	201-12	17879	95	15	5	201
95-0	201-12.2	18032	95	15	5	201
95-0	201-14.2	18023	95	15	5	201
95-0	201-14	17954	95	15	5	201
95-0	201-15	17841	95	15	5	201
95-0	201-17	17842	95	15	5	201
95-0	201-2	18091	95	15	5	201
95-0	201-3	18043	95	15	5	201
95-0	201-4	17926	95	15	5	201
95-0	201-6	17824	95	15	5	201
95-0	201-7	18245	95	15	5	201
95-0	201-9	18075	95	15	5	201
95-0	201-9.2	17975	95	15	5	201
95-0	203-10	17989	95	15	5	203
95-0	203-12	17762	95	15	5	203
95-0	203-13	17765	95	15	5	203
95-0	203-14	17759	95	15	5	203
95-0	203-15	17963	95	15	5	203
95-0	203-16	17918	95	15	5	203
95-0	203-17	17868	95	15	5	203
95-0	203-18	17822	95	15	5	203
95-0	203-19	17995	95	15	5	203
95-0	203-20	17976	95	15	5	203
95-0	203-9	18016	95	15	5	203
95-0	204-15	16959	95	15	5	204
95-0	207-0	42281	95	15	45	207
95-0	207-1	41826	95	15	45	207
95-0	207-10	41815	95	15	45	207
95-0	207-11	42181	95	15	45	207
95-0	207-12	42200	95	15	45	207
95-0	207-14	41895	95	15	45	207
95-0	207-16	41831	95	15	45	207
95-0	207-17	41876	95	15	45	207
95-0	207-2	40704	95	15	45	207
95-0	207-3	41807	95	15	45	207
95-0	207-4	41115	95	15	45	207
95-0	207-5	41435	95	15	45	207
95-0	207-6	41759	95	15	45	207
95-0	207-7	41448	95	15	45	207
95-0	207-8	40985	95	15	45	207
95-0	207-9	42258	95	15	45	207
95-0	210-0	17001	95	15	5	210
95-0	210-6	17177	95	15	5	210
95-0	57-0	17900	95	15	5	57
95-0	86-0	15315	95	15	8	86
95-0	86-10	15419	95	15	8	86
95-0	86-2	15271	95	15	8	86
95-0	86-7	15498	95	15	8	86
95-0	86-7.2	15421	95	15	8	86
95-0	97-2	17692	95	15	5	97
97-2	100-0	1348	97	5	840	100
97-2	100-1	2169	97	5	840	100
97-2	101-0	1463	97	5	5	101
97-2	101-1	1456	97	5	5	101
97-2	101-19	42264	97	5	45	101
97-2	101-2	1451	97	5	5	101
97-2	101-3	1455	97	5	5	101
97-2	101-4	1421	97	5	5	101
97-2	101-5	1447	97	5	5	101
97-2	101-6	1412	97	5	5	101
97-2	101-7	1422	97	5	5	101
97-2	101-8	1420	97	5	5	101
97-2	102-0	1133	97	5	5	102
97-2	102-1	1088	97	5	5	102
97-2	102-10	681	97	5	5	102
97-2	102-11	1093	97	5	5	102
97-2	102-12	1117	97	5	5	102
97-2	102-13	1028	97	5	5	102
97-2	102-14	1113	97	5	5	102
97-2	102-15	1065	97	5	5	102
97-2	102-16	1405	97	5	5	102
97-2	102-17	1429	97	5	5	102
97-2	102-18	1057	97	5	5	102
97-2	102-19	1406	97	5	5	102
97-2	102-20	1123	97	5	5	102
97-2	102-21	1405	97	5	5	102
97-2	102-22	1114	97	5	5	102
97-2	102-23	1117	97	5	5	102
97-2	102-24	1088	97	5	5	102
97-2	102-25	1092	97	5	5	102
97-2	102-26	1111	97	5	5	102
97-2	102-4	1046	97	5	5	102
97-2	102-5	1084	97	5	5	102
97-2	102-6	1101	97	5	5	102
97-2	102-7	1114	97	5	5	102
97-2	102-8	1098	97	5	5	102
97-2	102-9	1104	97	5	5	102
97-2	104-0	2035	97	5	5	104
97-2	104-1	2008	97	5	5	104
97-2	104-10	2048	97	5	5	104
97-2	104-11	2037	97	5	5	104
97-2	104-12	1972	97	5	5	104
97-2	104-13	2046	97	5	5	104
97-2	104-14	1955	97	5	5	104
97-2	104-15	2030	97	5	5	104
97-2	104-16	2100	97	5	5	104
97-2	104-17	2087	97	5	5	104
97-2	104-18	2053	97	5	5	104
97-2	104-19	1939	97	5	5	104
97-2	104-2	2015	97	5	5	104
97-2	104-20	2069	97	5	5	104
97-2	104-21	1918	97	5	5	104
97-2	104-22	2052	97	5	5	104
97-2	104-23	2002	97	5	5	104
97-2	104-24	2040	97	5	5	104
97-2	104-25	2041	97	5	5	104
97-2	104-26	2069	97	5	5	104
97-2	104-4	2054	97	5	5	104
97-2	104-5	1947	97	5	5	104
97-2	104-6	2007	97	5	5	104
97-2	104-7	1955	97	5	5	104
97-2	104-8	2060	97	5	5	104
97-2	104-9	2037	97	5	5	104
97-2	105-3	1490	97	5	5	105
97-2	106-0	2754	97	5	5	106
97-2	106-1	2767	97	5	5	106
97-2	106-10	2750	97	5	5	106
97-2	106-11	2720	97	5	5	106
97-2	106-12	2748	97	5	5	106
97-2	106-13	2766	97	5	5	106
97-2	106-14	2760	97	5	5	106
97-2	106-15	2770	97	5	5	106
97-2	106-16	2800	97	5	5	106
97-2	106-17	2671	97	5	5	106
97-2	106-19	2577	97	5	5	106
97-2	106-2	2720	97	5	5	106
97-2	106-20	2639	97	5	5	106
97-2	106-21	2767	97	5	5	106
97-2	106-3	2763	97	5	5	106
97-2	106-4	2702	97	5	5	106
97-2	106-5	2753	97	5	5	106
97-2	106-6	2632	97	5	5	106
97-2	106-7	1904	97	5	5	106
97-2	106-8	2793	97	5	5	106
97-2	106-9	2704	97	5	5	106
97-2	107-0	1822	97	5	3390	107
97-2	107-1	1790	97	5	3390	107
97-2	107-2	1826	97	5	3390	107
97-2	107-3	1832	97	5	3390	107
97-2	107-4	1831	97	5	3390	107
97-2	111-1.1	42708	97	5	45	111
97-2	111-1.2	42688	97	5	45	111
97-2	114-9	17360	97	5	8	114
97-2	119-0	32683	97	5	59	119
97-2	119-0.2	32731	97	5	59	119
97-2	119-10	39032	97	5	30	119
97-2	119-10.2	39038	97	5	30	119
97-2	119-11	38893	97	5	30	119
97-2	119-6	39391	97	5	30	119
97-2	119-7	39039	97	5	30	119
97-2	119-7.2	39015	97	5	30	119
97-2	119-8	38897	97	5	30	119
97-2	119-8.3	38826	97	5	30	119
97-2	119-9	39039	97	5	30	119
97-2	129-0	2243	97	5	1866	129
97-2	129-1	2232	97	5	1866	129
97-2	201-0	1490	97	5	5	201
97-2	201-1	1555	97	5	5	201
97-2	201-11	1566	97	5	5	201
97-2	201-12	1412	97	5	5	201
97-2	201-12.2	1488	97	5	5	201
97-2	201-14.2	1483	97	5	5	201
97-2	201-14	1433	97	5	5	201
97-2	201-15	1413	97	5	5	201
97-2	201-17	1398	97	5	5	201
97-2	201-2	1540	97	5	5	201
97-2	201-3	1503	97	5	5	201
97-2	201-4	1493	97	5	5	201
97-2	201-6	1400	97	5	5	201
97-2	201-7	1588	97	5	5	201
97-2	201-9	1550	97	5	5	201
97-2	201-9.2	1149	97	5	5	201
97-2	203-10	1115	97	5	5	203
97-2	203-12	1119	97	5	5	203
97-2	203-13	1044	97	5	5	203
97-2	203-14	1072	97	5	5	203
97-2	203-15	1110	97	5	5	203
97-2	203-16	1058	97	5	5	203
97-2	203-17	1168	97	5	5	203
97-2	203-18	1114	97	5	5	203
97-2	203-19	1177	97	5	5	203
97-2	203-20	1127	97	5	5	203
97-2	203-9	1178	97	5	5	203
97-2	204-15	1280	97	5	5	204
97-2	207-0	42994	97	5	45	207
97-2	207-1	42441	97	5	45	207
97-2	207-10	42459	97	5	45	207
97-2	207-11	42909	97	5	45	207
97-2	207-12	42881	97	5	45	207
97-2	207-14	42558	97	5	45	207
97-2	207-16	42477	97	5	45	207
97-2	207-17	42502	97	5	45	207
97-2	207-2	41286	97	5	45	207
97-2	207-3	42429	97	5	45	207
97-2	207-4	41733	97	5	45	207
97-2	207-5	42094	97	5	45	207
97-2	207-6	42409	97	5	45	207
97-2	207-7	42113	97	5	45	207
97-2	207-8	41633	97	5	45	207
97-2	207-9	42931	97	5	45	207
97-2	210-0	1578	97	5	5	210
97-2	210-6	1643	97	5	5	210
97-2	57-0	1722	97	5	5	57
97-2	86-0	17858	97	5	8	86
97-2	86-10	17994	97	5	8	86
97-2	86-2	17840	97	5	8	86
97-2	86-7	18045	97	5	8	86
97-2	86-7.2	17955	97	5	8	86
97-2	95-0	17631	97	5	15	95
100-0	100-1	25	100	840	840	100
100-0	101-0	1187	100	840	5	101
100-0	101-1	1176	100	840	5	101
100-0	101-19	41009	100	840	45	101
100-0	101-2	1176	100	840	5	101
100-0	101-3	1182	100	840	5	101
100-0	101-4	1123	100	840	5	101
100-0	101-5	1165	100	840	5	101
100-0	101-6	1109	100	840	5	101
100-0	101-7	1127	100	840	5	101
100-0	101-8	1133	100	840	5	101
100-0	102-0	824	100	840	5	102
100-0	102-1	782	100	840	5	102
100-0	102-10	834	100	840	5	102
100-0	102-11	800	100	840	5	102
100-0	102-12	816	100	840	5	102
100-0	102-13	770	100	840	5	102
100-0	102-14	824	100	840	5	102
100-0	102-15	810	100	840	5	102
100-0	102-16	1154	100	840	5	102
100-0	102-17	1169	100	840	5	102
100-0	102-18	802	100	840	5	102
100-0	102-19	1152	100	840	5	102
100-0	102-20	823	100	840	5	102
100-0	102-21	1142	100	840	5	102
100-0	102-22	818	100	840	5	102
100-0	102-23	827	100	840	5	102
100-0	102-24	830	100	840	5	102
100-0	102-25	801	100	840	5	102
100-0	102-26	819	100	840	5	102
100-0	102-4	785	100	840	5	102
100-0	102-5	796	100	840	5	102
100-0	102-6	803	100	840	5	102
100-0	102-7	821	100	840	5	102
100-0	102-8	811	100	840	5	102
100-0	102-9	816	100	840	5	102
100-0	104-0	1326	100	840	5	104
100-0	104-1	1315	100	840	5	104
100-0	104-10	1330	100	840	5	104
100-0	104-11	1327	100	840	5	104
100-0	104-12	1294	100	840	5	104
100-0	104-13	1324	100	840	5	104
100-0	104-14	1280	100	840	5	104
100-0	104-15	1321	100	840	5	104
100-0	104-16	1346	100	840	5	104
100-0	104-17	1329	100	840	5	104
100-0	104-18	1325	100	840	5	104
100-0	104-19	1287	100	840	5	104
100-0	104-2	1320	100	840	5	104
100-0	104-20	1335	100	840	5	104
100-0	104-21	1245	100	840	5	104
100-0	104-22	1331	100	840	5	104
100-0	104-23	1302	100	840	5	104
100-0	104-24	1327	100	840	5	104
100-0	104-25	1327	100	840	5	104
100-0	104-26	1344	100	840	5	104
100-0	104-4	1333	100	840	5	104
100-0	104-5	1275	100	840	5	104
100-0	104-6	1307	100	840	5	104
100-0	104-7	1291	100	840	5	104
100-0	104-8	1328	100	840	5	104
100-0	104-9	1323	100	840	5	104
100-0	105-3	1442	100	840	5	105
100-0	106-0	1297	100	840	5	106
100-0	106-1	1294	100	840	5	106
100-0	106-10	1292	100	840	5	106
100-0	106-11	1271	100	840	5	106
100-0	106-12	1281	100	840	5	106
100-0	106-13	1291	100	840	5	106
100-0	106-14	1285	100	840	5	106
100-0	106-15	1300	100	840	5	106
100-0	106-16	1298	100	840	5	106
100-0	106-17	1280	100	840	5	106
100-0	106-19	1256	100	840	5	106
100-0	106-2	1275	100	840	5	106
100-0	106-20	1257	100	840	5	106
100-0	106-21	1304	100	840	5	106
100-0	106-3	1279	100	840	5	106
100-0	106-4	1260	100	840	5	106
100-0	106-5	1291	100	840	5	106
100-0	106-6	1265	100	840	5	106
100-0	106-7	1312	100	840	5	106
100-0	106-8	1300	100	840	5	106
100-0	106-9	1277	100	840	5	106
100-0	107-0	933	100	840	3390	107
100-0	107-1	922	100	840	3390	107
100-0	107-2	930	100	840	3390	107
100-0	107-3	926	100	840	3390	107
100-0	107-4	933	100	840	3390	107
100-0	111-1.1	41055	100	840	45	111
100-0	111-1.2	41019	100	840	45	111
100-0	114-9	17200	100	840	8	114
100-0	119-0	32103	100	840	59	119
100-0	119-0.2	32139	100	840	59	119
100-0	119-10	38296	100	840	30	119
100-0	119-10.2	38314	100	840	30	119
100-0	119-11	38157	100	840	30	119
100-0	119-6	38678	100	840	30	119
100-0	119-7	38340	100	840	30	119
100-0	119-7.2	38295	100	840	30	119
100-0	119-8	38189	100	840	30	119
100-0	119-8.3	38120	100	840	30	119
100-0	119-9	38342	100	840	30	119
100-0	129-0	745	100	840	1866	129
100-0	129-1	739	100	840	1866	129
100-0	201-0	1478	100	840	5	201
100-0	201-1	1539	100	840	5	201
100-0	201-11	1545	100	840	5	201
100-0	201-12	1184	100	840	5	201
100-0	201-12.2	1495	100	840	5	201
100-0	201-14.2	1491	100	840	5	201
100-0	201-14	1199	100	840	5	201
100-0	201-15	1188	100	840	5	201
100-0	201-17	1184	100	840	5	201
100-0	201-2	1542	100	840	5	201
100-0	201-3	1494	100	840	5	201
100-0	201-4	1479	100	840	5	201
100-0	201-6	1173	100	840	5	201
100-0	201-7	1550	100	840	5	201
100-0	201-9	1539	100	840	5	201
100-0	201-9.2	1547	100	840	5	201
100-0	203-10	1591	100	840	5	203
100-0	203-12	1631	100	840	5	203
100-0	203-13	1562	100	840	5	203
100-0	203-14	1556	100	840	5	203
100-0	203-15	1601	100	840	5	203
100-0	203-16	1590	100	840	5	203
100-0	203-17	1645	100	840	5	203
100-0	203-18	1644	100	840	5	203
100-0	203-19	1510	100	840	5	203
100-0	203-20	1587	100	840	5	203
100-0	203-9	1672	100	840	5	203
100-0	204-15	1184	100	840	5	204
100-0	207-0	41639	100	840	45	207
100-0	207-1	41165	100	840	45	207
100-0	207-10	41159	100	840	45	207
100-0	207-11	41584	100	840	45	207
100-0	207-12	41569	100	840	45	207
100-0	207-14	41257	100	840	45	207
100-0	207-16	41182	100	840	45	207
100-0	207-17	41201	100	840	45	207
100-0	207-2	40033	100	840	45	207
100-0	207-3	41158	100	840	45	207
100-0	207-4	40481	100	840	45	207
100-0	207-5	40805	100	840	45	207
100-0	207-6	41128	100	840	45	207
100-0	207-7	40841	100	840	45	207
100-0	207-8	40401	100	840	45	207
100-0	207-9	41603	100	840	45	207
100-0	210-0	1178	100	840	5	210
100-0	210-6	1225	100	840	5	210
100-0	57-0	1427	100	840	5	57
100-0	86-0	16926	100	840	8	86
100-0	86-10	17010	100	840	8	86
100-0	86-2	16889	100	840	8	86
100-0	86-7	17077	100	840	8	86
100-0	86-7.2	17016	100	840	8	86
100-0	95-0	16804	100	840	15	95
100-0	97-2	1403	100	840	5	97
101-0	100-0	1111	101	5	840	100
101-0	100-1	1857	101	5	840	100
101-0	101-1	7	101	5	5	101
101-0	101-19	42009	101	5	45	101
101-0	101-2	6	101	5	5	101
101-0	101-3	8	101	5	5	101
101-0	101-4	6	101	5	5	101
101-0	101-5	8	101	5	5	101
101-0	101-6	7	101	5	5	101
101-0	101-7	5	101	5	5	101
101-0	101-8	5	101	5	5	101
101-0	102-0	671	101	5	5	102
101-0	102-1	636	101	5	5	102
101-0	102-10	393	101	5	5	102
101-0	102-11	646	101	5	5	102
101-0	102-12	668	101	5	5	102
101-0	102-13	627	101	5	5	102
101-0	102-14	670	101	5	5	102
101-0	102-15	655	101	5	5	102
101-0	102-16	905	101	5	5	102
101-0	102-17	930	101	5	5	102
101-0	102-18	622	101	5	5	102
101-0	102-19	912	101	5	5	102
101-0	102-20	669	101	5	5	102
101-0	102-21	899	101	5	5	102
101-0	102-22	665	101	5	5	102
101-0	102-23	670	101	5	5	102
101-0	102-24	682	101	5	5	102
101-0	102-25	639	101	5	5	102
101-0	102-26	661	101	5	5	102
101-0	102-4	617	101	5	5	102
101-0	102-5	635	101	5	5	102
101-0	102-6	658	101	5	5	102
101-0	102-7	668	101	5	5	102
101-0	102-8	655	101	5	5	102
101-0	102-9	656	101	5	5	102
101-0	104-0	1850	101	5	5	104
101-0	104-1	1837	101	5	5	104
101-0	104-10	1867	101	5	5	104
101-0	104-11	1857	101	5	5	104
101-0	104-12	1768	101	5	5	104
101-0	104-13	1864	101	5	5	104
101-0	104-14	1755	101	5	5	104
101-0	104-15	1853	101	5	5	104
101-0	104-16	1906	101	5	5	104
101-0	104-17	1889	101	5	5	104
101-0	104-18	1865	101	5	5	104
101-0	104-19	1780	101	5	5	104
101-0	104-2	1842	101	5	5	104
101-0	104-20	1880	101	5	5	104
101-0	104-21	1761	101	5	5	104
101-0	104-22	1858	101	5	5	104
101-0	104-23	1801	101	5	5	104
101-0	104-24	1858	101	5	5	104
101-0	104-25	1865	101	5	5	104
101-0	104-26	1884	101	5	5	104
101-0	104-4	1866	101	5	5	104
101-0	104-5	1753	101	5	5	104
101-0	104-6	1830	101	5	5	104
101-0	104-7	1787	101	5	5	104
101-0	104-8	1869	101	5	5	104
101-0	104-9	1864	101	5	5	104
101-0	105-3	994	101	5	5	105
101-0	106-0	2360	101	5	5	106
101-0	106-1	2385	101	5	5	106
101-0	106-10	2368	101	5	5	106
101-0	106-11	2323	101	5	5	106
101-0	106-12	2344	101	5	5	106
101-0	106-13	2373	101	5	5	106
101-0	106-14	2375	101	5	5	106
101-0	106-15	2384	101	5	5	106
101-0	106-16	2400	101	5	5	106
101-0	106-17	2281	101	5	5	106
101-0	106-19	2216	101	5	5	106
101-0	106-2	2329	101	5	5	106
101-0	106-20	2250	101	5	5	106
101-0	106-21	2378	101	5	5	106
101-0	106-3	2375	101	5	5	106
101-0	106-4	2314	101	5	5	106
101-0	106-5	2375	101	5	5	106
101-0	106-6	2273	101	5	5	106
101-0	106-7	1750	101	5	5	106
101-0	106-8	2393	101	5	5	106
101-0	106-9	2330	101	5	5	106
101-0	107-0	1510	101	5	3390	107
101-0	107-1	1489	101	5	3390	107
101-0	107-2	1523	101	5	3390	107
101-0	107-3	1516	101	5	3390	107
101-0	107-4	1523	101	5	3390	107
101-0	111-1.1	42500	101	5	45	111
101-0	111-1.2	42469	101	5	45	111
101-0	114-9	17246	101	5	8	114
101-0	119-0	32582	101	5	59	119
101-0	119-0.2	32617	101	5	59	119
101-0	119-10	38940	101	5	30	119
101-0	119-10.2	38979	101	5	30	119
101-0	119-11	38820	101	5	30	119
101-0	119-6	39315	101	5	30	119
101-0	119-7	38963	101	5	30	119
101-0	119-7.2	38928	101	5	30	119
101-0	119-8	38829	101	5	30	119
101-0	119-8.3	38741	101	5	30	119
101-0	119-9	38962	101	5	30	119
101-0	129-0	1878	101	5	1866	129
101-0	129-1	1872	101	5	1866	129
101-0	201-0	913	101	5	5	201
101-0	201-1	999	101	5	5	201
101-0	201-11	1006	101	5	5	201
101-0	201-12	962	101	5	5	201
101-0	201-12.2	926	101	5	5	201
101-0	201-14.2	936	101	5	5	201
101-0	201-14	987	101	5	5	201
101-0	201-15	971	101	5	5	201
101-0	201-17	941	101	5	5	201
101-0	201-2	967	101	5	5	201
101-0	201-3	942	101	5	5	201
101-0	201-4	920	101	5	5	201
101-0	201-6	950	101	5	5	201
101-0	201-7	1022	101	5	5	201
101-0	201-9	974	101	5	5	201
101-0	201-9.2	729	101	5	5	201
101-0	203-10	957	101	5	5	203
101-0	203-12	889	101	5	5	203
101-0	203-13	801	101	5	5	203
101-0	203-14	836	101	5	5	203
101-0	203-15	952	101	5	5	203
101-0	203-16	822	101	5	5	203
101-0	203-17	810	101	5	5	203
101-0	203-18	857	101	5	5	203
101-0	203-19	932	101	5	5	203
101-0	203-20	827	101	5	5	203
101-0	203-9	825	101	5	5	203
101-0	204-15	1125	101	5	5	204
101-0	207-0	42724	101	5	45	207
101-0	207-1	42177	101	5	45	207
101-0	207-10	42185	101	5	45	207
101-0	207-11	42650	101	5	45	207
101-0	207-12	42628	101	5	45	207
101-0	207-14	42285	101	5	45	207
101-0	207-16	42198	101	5	45	207
101-0	207-17	42250	101	5	45	207
101-0	207-2	41036	101	5	45	207
101-0	207-3	42164	101	5	45	207
101-0	207-4	41462	101	5	45	207
101-0	207-5	41822	101	5	45	207
101-0	207-6	42131	101	5	45	207
101-0	207-7	41859	101	5	45	207
101-0	207-8	41366	101	5	45	207
101-0	207-9	42680	101	5	45	207
101-0	210-0	1544	101	5	5	210
101-0	210-6	1595	101	5	5	210
101-0	57-0	1266	101	5	5	57
101-0	86-0	17827	101	5	8	86
101-0	86-10	17941	101	5	8	86
101-0	86-2	17802	101	5	8	86
101-0	86-7	18029	101	5	8	86
101-0	86-7.2	17933	101	5	8	86
101-0	95-0	17626	101	5	15	95
101-0	97-2	1458	101	5	5	97
101-19	100-0	39377	101	45	840	100
101-19	100-1	40677	101	45	840	100
101-19	101-0	42024	101	45	5	101
101-19	101-1	42039	101	45	5	101
101-19	101-2	41902	101	45	5	101
101-19	101-3	41784	101	45	5	101
101-19	101-4	40114	101	45	5	101
101-19	101-5	41597	101	45	5	101
101-19	101-6	38857	101	45	5	101
101-19	101-7	39519	101	45	5	101
101-19	101-8	40194	101	45	5	101
101-19	102-0	41683	101	45	5	102
101-19	102-1	38728	101	45	5	102
101-19	102-10	40890	101	45	5	102
101-19	102-11	39505	101	45	5	102
101-19	102-12	40833	101	45	5	102
101-19	102-13	38462	101	45	5	102
101-19	102-14	41631	101	45	5	102
101-19	102-15	40707	101	45	5	102
101-19	102-16	41566	101	45	5	102
101-19	102-17	41827	101	45	5	102
101-19	102-18	40652	101	45	5	102
101-19	102-19	40932	101	45	5	102
101-19	102-20	41527	101	45	5	102
101-19	102-21	40149	101	45	5	102
101-19	102-22	40471	101	45	5	102
101-19	102-23	41318	101	45	5	102
101-19	102-24	41566	101	45	5	102
101-19	102-25	39096	101	45	5	102
101-19	102-26	41238	101	45	5	102
101-19	102-4	40450	101	45	5	102
101-19	102-5	39520	101	45	5	102
[truncated: 2,607 more rows]

## Sheet: Table S6
Gene_symbol	Class	Subclass	MRSA-1369	86-0	86-2	95-0	97-2	100-0	100-1	111-1	111-1.2	86-7.2	86-7	105-3	86-10.2	86-10	114-9	119-0.2	119-0	129-0	119-6	129-1	119-7.2	119-7.3	119-7	119-7.4	119-7.5	119-7.6	119-7.7	119-7.8	119-7.9	119-8.1	119-8.2	119-8.3	119-8.4	119-9	119-10.2	119-10	119-11.2	119-11	57-0	101-0	101-1	101-2	101-3	101-4	101-5	101-6	101-7
[truncated: 39 more rows]
[truncated: 125 more columns]

[truncated: 2 more sheets: Table S7, Table S8]
